# Supplementary material for: Tandem Pd-catalyzed annulation/coupling of acetylenic enamines with aryl triflates
Source: Royal Society of Chemistry journal article supplement (doi:10.1039/d3cc00671a), 2023-01-01
Supplement: d3cc00671a1.pdf [file d3cc00671a1.pdf]

## Supporting Information

### **Tandem Pd-catalyzed annulation/coupling of acetylenic enamines with aryl triflates.**

Aleksandra Błocka, Jakub Ostapko and Wojciech Chaładaj\*

*Institute of Organic Chemistry Polish Academy of Sciences  
Kasprzaka 44/52, 01-224 Warsaw, Poland*

e-mail: wojciech.chaladaj@icho.edu.pl

## Table of contents

|                                                                                                                                                                           |     |
|---------------------------------------------------------------------------------------------------------------------------------------------------------------------------|-----|
| Table of contents .....                                                                                                                                                   | 2   |
| General Information .....                                                                                                                                                 | 3   |
| Evaluation of reaction conditions for Pd-catalyzed cyclization/coupling of 1-(2-methyl-1-phenylhept-1-en-6-yn-1-yl)pyrrolidine with phenyl trifluoromethanesulfonate..... | 4   |
| General procedure for substrates synthesis – ketone and enamines.....                                                                                                     | 8   |
| General procedure for Pd-catalyzed cyclization/coupling of acetylenic enamines and aryl triflates .....                                                                   | 11  |
| Kinetic profiles for the reaction of various enamines with phenyl triflate.....                                                                                           | 23  |
| Kinetic profiles for the reaction of <b>3</b> with electronically varied aryl triflates. ....                                                                             | 24  |
| Structure elucidation of compound <b>4</b> .....                                                                                                                          | 25  |
| Computational studies .....                                                                                                                                               | 27  |
| Copies of <sup>1</sup> H and <sup>13</sup> C{ <sup>1</sup> H} NMR spectra of isolated compounds.....                                                                      | 93  |
| References.....                                                                                                                                                           | 142 |

## General Information

All the manipulations were performed in a nitrogen-filled glovebox or under an argon atmosphere using Schlenk techniques, unless mentioned otherwise. Flash chromatography was performed using Merck silica gel 60 (230-400 mesh). TLC analysis of reaction mixtures was performed on Merck silica gel 60 F254 TLC plates and visualized with cerium molybdate stain (Hanessian's stain).  $^1\text{H}$ ,  $^{13}\text{C}$  { $^1\text{H}$ }, and  $^{19}\text{F}$  NMR spectra were recorded with a Bruker AV 400 spectrometer.  $^1\text{H}$  and  $^{13}\text{C}$  chemical shifts are given in ppm relative to TMS. The solvent signals were used as references ( $\text{CDCl}_3$   $\delta_{\text{H}} = 7.26$  ppm,  $\delta_{\text{C}} = 77.0$  ppm) and the chemical shift converted to the TMS scale. Coupling constants (J) are reported in Hz, and the following abbreviations were used to denote multiplets: s = singlet, d = doublet, t = triplet, q = quartet, quint = quintet, m = multiplet (denotes complex pattern), dd = doublet of doublets, dt = doublet of triplets and br = broad signal. Infrared spectra were recorded with a Jasco FTIR-6200 spectrometer. Electron ionization high-resolution mass spectra (EI-HR) were recorded with an Autospec Premier (Waters Inc) mass spectrometer using the narrow-range high-voltage scan technique with low-boiling perfluorokerosene (PFK) as internal standard. Samples were introduced by using a heated direct insertion probe. Electrospray ionization high-resolution mass spectra (ESI-HR) were recorded with MALDISynapt G2-S HDMS (Waters Inc) mass spectrometer equipped with an electrospray ion source and q-TOF type mass analyzer. ESI-MS spectra were recorded in the positive ion mode (the source parameters: capillary voltage 3.15 kV, sampling cone 25 V, source temperature 120 °C, desolvation temperature 150 °C). GC analyses were performed on Agilent 9890B Gas Chromatograph equipped with FID detector and INERTCAP 5MS/Sil (30 m, 0.32 mm ID, 0.50  $\mu\text{m}$  df) The following temperature program was used: 100 °C (2 min), 20 °C/min to 310 °C (2 min). Unless otherwise noted, all commercially available compounds (ABCR, Acros, Fluorochem, TCI, Sigma-Aldrich, Strem) were used as received. Phosphine ligands were purchased from Aldrich,  $\text{Pd}(\text{OAc})_2$  was purchased Strem. Precatalyst RuPhos Pd G3 was prepared following Buchwald's procedure,<sup>1</sup> and showed similar reactivity to the commercial sample purchased from Strem.

## Evaluation of reaction conditions for Pd-catalyzed cyclization/coupling of 1-(2-methyl-1-phenylhept-1-en-6-yn-1-yl)pyrrolidine with phenyl trifluoromethanesulfonate.

**General procedure for evaluation of reaction conditions:** In a glovebox, to a 4-mL screw-capped vial containing catalyst (typically 5 mol%) following reagents were added: 1-(2-methyl-1-phenylhept-1-en-6-yn-1-yl)pyrrolidine (25.3 mg, 0.100 mmol), phenyl trifluoromethanesulfonate (32.0 mg, 0.150 mmol), base (0.150 mmol) and solvent (0.25 ml or 0.5 ml). Then, magnetic stirring bar was placed and the vial was sealed with a cap containing a PTFE septum. The reaction mixture was stirred at 50 or 80 °C for 24 h and then cooled to room temperature. The mixture was diluted with MTBE (2 mL) quenched with sat. aqueous NH<sub>4</sub>Cl (0.5 mL) and mesitylene (25 μl) was added as a internal standard. An aliquot (200 μl) of the organic layer was diluted with MTBE and analyzed by GC.

**Table S1. Effect of catalyst**

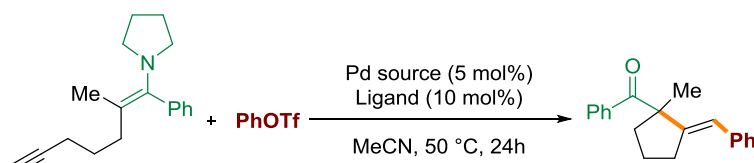

| Entry | Palladium source     | Ligand                                            | Yield |
|-------|----------------------|---------------------------------------------------|-------|
| 1     | Pd(dba) <sub>2</sub> | XPhos                                             | 0%    |
| 2     | Pd(dba) <sub>2</sub> | RuPhos                                            | 47%   |
| 3     | Pd(dba) <sub>2</sub> | APhos                                             | 0%    |
| 4     | Pd(dba) <sub>2</sub> | SPhos                                             | 0%    |
| 5     | Pd(dba) <sub>2</sub> | DavePhos                                          | 38%   |
| 6     | Pd(dba) <sub>2</sub> | XantPhos                                          | 0%    |
| 7     | Pd(dba) <sub>2</sub> | CyJohnPhos                                        | 0%    |
| 8     | Pd(dba) <sub>2</sub> | JackiePhos                                        | 0%    |
| 9     | Pd(dba) <sub>2</sub> | DPEPhos                                           | 0%    |
| 10    | Pd(dba) <sub>2</sub> | MonoPhos                                          | 0%    |
| 11    | Pd(dba) <sub>2</sub> | PPh <sub>3</sub>                                  | 0%    |
| 12    | Pd(dba) <sub>2</sub> | PCy <sub>3</sub>                                  | 0%    |
| 13    | Pd(dba) <sub>2</sub> | P(o-tol) <sub>3</sub>                             | 0%    |
| 14    | Pd(dba) <sub>2</sub> | DPPF                                              | 0%    |
| 15    | Pd(dba) <sub>2</sub> | DPPM                                              | 0%    |
| 16    | Pd(dba) <sub>2</sub> | DPPP                                              | 0%    |
| 17    | Pd(dba) <sub>2</sub> | DPPPy                                             | 0%    |
| 18    | Pd(dba) <sub>2</sub> | t-BuXPhos                                         | 0%    |
| 19    | Pd(dba) <sub>2</sub> | BrettPhos                                         | 0%    |
| 20    | Pd(dba) <sub>2</sub> | (R)-BINAP                                         | 0%    |
| 21    | Pd(dba) <sub>2</sub> | (R)-tol-BINAP                                     | 0%    |
| 22    | Pd(dba) <sub>2</sub> | (R)-DM-BINAP                                      | 0%    |
| 23    | Pd(dba) <sub>2</sub> | (R)-SEGPhos 0%                                    | 0%    |
| 24    | Pd(dba) <sub>2</sub> | (R)-(-)-DTBM-SEGPhos                              | 0%    |
| 25    | Pd(dba) <sub>2</sub> | (R,S)-O PINAP                                     | 0%    |
| 26    | Pd(dba) <sub>2</sub> | (R,R)-DACH-phenyl                                 | 0%    |
| 27    | Pd(dba) <sub>2</sub> | (S)-5,5-(Dimethyl)-i-Pr-PHOX                      | 0%    |
| 28    | Pd(dba) <sub>2</sub> | (1S,2S)-(2-Amino-1-phenylpropyl)diphenylphosphine | 0%    |



|    |                                    |                       |     |
|----|------------------------------------|-----------------------|-----|
| 29 | Pd(PPh <sub>3</sub> ) <sub>4</sub> | XPhos                 | 0%  |
| 30 | Pd(PPh <sub>3</sub> ) <sub>4</sub> | RuPhos                | 13% |
| 31 | Pd(PPh <sub>3</sub> ) <sub>4</sub> | APhos                 | 0%  |
| 32 | Pd(PPh <sub>3</sub> ) <sub>4</sub> | SPhos                 | 10% |
| 33 | Pd(PPh <sub>3</sub> ) <sub>4</sub> | DavePhos              | 23% |
| 34 | Pd(PPh <sub>3</sub> ) <sub>4</sub> | t-BuXPhos             | 4%  |
| 35 | Pd(PPh <sub>3</sub> ) <sub>4</sub> | CyJohnPhos            | 0%  |
| 36 | Pd(PPh <sub>3</sub> ) <sub>4</sub> | JackiePhos            | 4%  |
| 37 | Pd(PPh <sub>3</sub> ) <sub>4</sub> | DPEPhos               | 4%  |
| 38 | Pd(PPh <sub>3</sub> ) <sub>4</sub> | MonoPhos              | 0%  |
| 39 | Pd(PPh <sub>3</sub> ) <sub>4</sub> | PPh <sub>3</sub>      | 0%  |
| 40 | Pd(PPh <sub>3</sub> ) <sub>4</sub> | PCy <sub>3</sub>      | 0%  |
| 41 | Pd(PPh <sub>3</sub> ) <sub>4</sub> | P(o-tol) <sub>3</sub> | 0%  |
| 42 | Pd(PPh <sub>3</sub> ) <sub>4</sub> | BINAP                 | 0%  |
| 43 | RuPhos PdG3                        | —                     | 19% |
| 44 | DavePhos PdG3                      | —                     | 10% |

<sup>a</sup>Conditions: L (10 mol%), Pd(dba)<sub>2</sub> or Pd(PPh<sub>3</sub>)<sub>4</sub> (5 mol%), 1-(2-methyl-1-phenylhept-1-en-6-yn-1-yl)pyrrolidine (0.100 mmol, 1 equiv.), phenylmethanesulphonate (0.150 mmol, 1.5 equiv.), MeCN (0.5 mL), 50°C, 24h. <sup>b</sup>Yield was determined by GC with mesitylene as an internal standard.

**Table S2. Effect of solvent.**

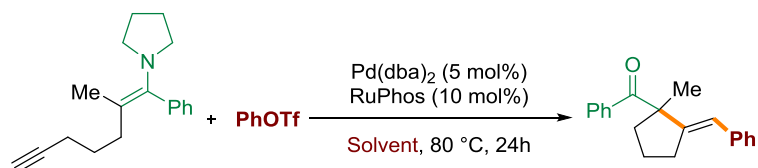

| Entry | Solvent | Yield |
|-------|---------|-------|
| 1     | THF     | 16%   |
| 2     | DMF     | 4%    |
| 3     | NMP     | 5%    |
| 4     | DMSO    | 9%    |
| 5     | DCM     | 37%   |
| 6     | Acetone | 79%   |
| 7     | DMPU    | 8%    |
| 8     | Dioxane | 56%   |
| 9     | AcOEt   | 17%   |
| 10    | MeCN    | 65%   |

<sup>a</sup>Conditions: RuPhos (10 mol%), Pd(dba)<sub>2</sub> (5 mol%), 1-(2-methyl-1-phenylhept-1-en-6-yn-1-yl)pyrrolidine (0.100 mmol, 1 equiv.), phenylmethanesulphonate (0.150 mmol, 1.5 equiv.), solvent (0.5 mL), 80°C, 24h. <sup>b</sup>Yield was determined by GC with mesitylene as an internal standard.

**Table S3. Effect of base/additive.**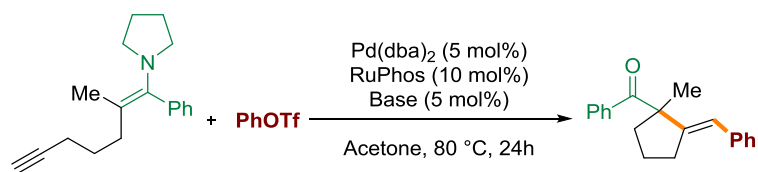

| Entry | Base                     | Yield      |
|-------|--------------------------|------------|
| 1     | $\text{Cs}_2\text{CO}_3$ | 34%        |
| 2     | $\text{CsF}$             | 14%        |
| 3     | $\text{K}_2\text{CO}_3$  | 11%        |
| 4     | $\text{Li}_2\text{CO}_3$ | 16%        |
| 5     | t-BuOLi                  | 11%        |
| 6     | $\text{BaCO}_3$          | 16%        |
| 7     | DMAP                     | 6%         |
| 8     | KHMDS                    | 77%        |
| 9     | <b>NaHMDS</b>            | <b>90%</b> |
| 10    | LiHMDS                   | 85%        |
| 11    | AcONa                    | 21%        |
| 12    | $\text{K}_3\text{PO}_4$  | 10%        |

<sup>a</sup>Conditions: RuPhos (10 mol%),  $\text{Pd(dba)}_2$  (5 mol%), 1-(2-methyl-1-phenylhept-1-en-6-yn-1-yl)pyrrolidine (0.100 mmol, 1 equiv.), phenylmethanesulphonate (0.150 mmol, 1.5 equiv.), acetone (0.25 mL), base (5 mol%), 80°C, 24h. <sup>b</sup>Yield was determined by GC with mesitylene as an internal standard.

**Table S4. Effect of NaHMDS in various solvents.**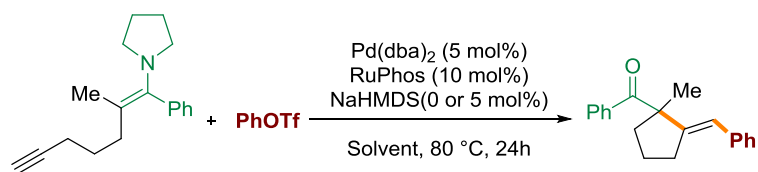

| Entry | Solvent | NaHMDS | Yield |
|-------|---------|--------|-------|
| 1     | Acetone | -      | 79%   |
| 2     | Acetone | 5 mol% | 90%   |
| 3     | MeCN    | -      | 65%   |
| 4     | MeCN    | 5 mol% | 79%   |
| 5     | Dioxane | -      | 56%   |
| 6     | Dioxane | 5 mol% | 65%   |
| 7     | DCM     | -      | 37%   |
| 8     | DCM     | 5 mol% | 48%   |

<sup>a</sup>Conditions: RuPhos (10 mol%),  $\text{Pd(dba)}_2$  (5 mol%), 1-(2-methyl-1-phenylhept-1-en-6-yn-1-yl)pyrrolidine (0.100 mmol, 1 equiv.), phenylmethanesulphonate (0.150 mmol, 1.5 equiv.), acetone (0.25 mL), NaHMDS (0 or 5 mol%), 80°C, 24h. <sup>b</sup>Yield was determined by GC with mesitylene as an internal standard.

### **Comment on influence of NaHMDS on reactivity.**

The positive impact of NaHMDS on the reaction performance is not fully understood, however some conclusions can be drawn. One can consider that added base could neutralize traces of acids (e.g. HCl) present in crude enamine. From this perspective, however, detrimental effect of other tested bases is unclear. Generally, presence of bases, in particular in greater amounts favors Sonogashira coupling. Furthermore, crude enamine was shown by NMR to be acceptably pure (e.g. no parent ketone was present) and elemental analysis shown no chlorine in a sample of crude enamine (which excludes traces of HCl). Furthermore enamine purified by Kugelrohr distillation showed similar reactivity (also positive effect of NaHMDS) to a crude substrate. Hydrolysis of enamine and reaction of the resulting ketone under strongly basic conditions can also be ruled out. The reaction is carried out under anhydrous conditions, which excludes hydrolysis. Moreover ketone **1** was independently shown to be uncreative under variety of conditions tested, including presence of NaHMDS. It's probable that acetone (solvent) can directly react with strong base triggering aldol-type reaction. If this side reaction has influence on the reactivity of enamine, the effect should be specific only to reactions run in acetone. In fact addition of enamine is also beneficial in other solvent, including acetonitrile, but also dioxane and dichloromethane, both lacking sufficiently C-H acidic centers.

It could be speculated that NaHMDS can modulate reactivity and/or stability of the palladium catalyst before its reaction towards weakly coordinating alkynes moiety. Reversible coordination of organic base to Pd-centre (dissociation facilitated by steric hindrance) was postulated to enable efficient Buchwald-Hartwig reaction of aryl triflates with weakly binding amines (e.g. secondary aryl amines).<sup>2,3</sup>

## General procedure for substrates synthesis – ketone and enamines

### General procedure for the synthesis of acetylenic ketones

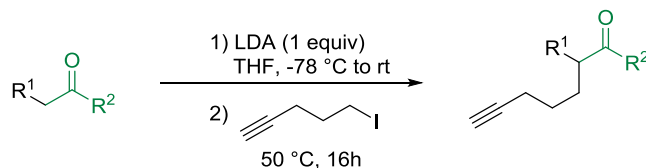

Solution of diisopropyl amine (1.70 g, 16.5 mmol) in THF (100 ml) was cooled to -78 °C, then n-BuLi (6 mL, 2.5M in hexanes, 15 mmol) was added dropwise and mixture was allowed to reach slowly room temperature, left for 30 min. Next ketone (15 mmol) was added at -78 °C, mixture was again allowed to reach room temperature and 5-iodopent-1-yne (12 mmol) was added dropwise. Reaction was carried out overnight (16h) at 50 °C, cooled to room temperature, quenched with 50 ml of sat. aqueous NH<sub>4</sub>Cl, washed with Et<sub>2</sub>O and extracted with Et<sub>2</sub>O (3 x 50 ml). Combined organic phases were dried over Na<sub>2</sub>SO<sub>4</sub>, filtered and concentrated. Crude ketone was purified via column chromatography.

#### 2-methyl-1-phenylhept-6-yn-1-one

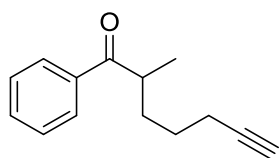

Prepared under general conditions in reaction of propiophenone (2.02 g, 15.1 mmol) and 5-iodopent-1-yne (2.33 g, 12.0 mmol). Product was isolated after column chromatography as pale yellow oil (2.09 g, 10.4 mmol, 87%). <sup>1</sup>H NMR (400 MHz, CDCl<sub>3</sub>) δ 7.98 – 7.93 (m, 2H), 7.58 – 7.52 (m, 1H), 7.49 – 7.43 (m, 2H), 3.54 – 3.45 (m, 1H), 2.19 (td, *J* = 6.8, 2.6 Hz, 2H), 1.97 – 1.88 (m, 2H), 1.63 – 1.51 (m, 3H), 1.21 (d, *J* = 6.9 Hz, 3H). <sup>13</sup>C NMR (101 MHz, CDCl<sub>3</sub>) δ 203.9, 136.6, 132.9, 128.6, 128.2, 84.0, 68.6, 40.1, 32.6, 26.2, 18.5, 17.3. HRMS (ESI): *m/z* calcd for C<sub>14</sub>H<sub>16</sub>ONa 223.1009; found 223.1011.

#### 2-ethyl-1-phenylhept-6-yn-1-one

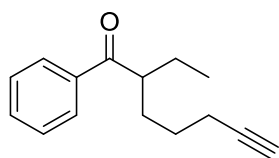

Prepared under general conditions in reaction of phenyl-1-butan-1-one (2.22 g, 15.0 mmol) and 5-iodopent-1-yne (2.33 g, 12.0 mmol). Product was isolated after column chromatography as pale yellow oil (1.47 g, 6.9 mmol, 57%). <sup>1</sup>H NMR (400 MHz, CDCl<sub>3</sub>) δ 7.98 – 7.93 (m, 2H), 7.58 – 7.52 (m, 1H), 7.51 – 7.42 (m, 2H), 3.39 (tt, *J* = 7.7, 5.5 Hz, 1H), 2.16 (td, *J* = 7.0, 2.6 Hz, 2H), 1.92 (t, *J* = 2.7 Hz, 1H), 1.90 – 1.74 (m, 2H), 1.71 – 1.44 (m, 4H), 0.88 (t, *J* = 7.4 Hz, 3H). <sup>13</sup>C NMR (101 MHz, CDCl<sub>3</sub>) δ 204.0, 137.6, 132.9, 128.6, 128.1, 84.0, 68.5, 47.1, 30.7, 26.3, 25.4, 18.5, 11.7. HRMS (ESI): *m/z* calcd for C<sub>15</sub>H<sub>18</sub>ONa 237.1255; found 237.1254.

#### 1-(4-fluorophenyl)-2-methylhept-6-yn-1-one

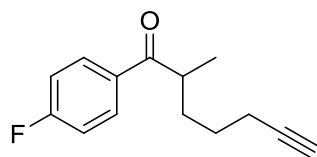

Prepared under general conditions in reaction of 1-(4-fluorophenyl)propan-1-one (2.29 g, 15.0 mmol) and 5-iodopent-1-yne (2.33 g, 12.0 mmol). Product was isolated after column chromatography as pale yellow oil (675 mg, 3.09, 26%). <sup>1</sup>H NMR (400 MHz, CDCl<sub>3</sub>) δ 8.01 – 7.95 (m, 2H), 7.17 – 7.09 (m, 2H), 3.49 – 3.39 (m, 1H), 2.19 (td, *J* = 6.9, 2.6 Hz, 2H), 1.97 – 1.87 (m, 2H), 1.63 – 1.49 (m, 3H), 1.20 (d, *J* = 6.9 Hz, 3H). <sup>13</sup>C NMR (101 MHz, CDCl<sub>3</sub>) δ 202.3, 166.9, 164.4, 132.9, 130.9, 130.8, 115.8, 115.6, 84.0, 68.6, 40.1, 32.5, 26.2, 18.4, 17.3. HRMS (ESI): *m/z* calcd for C<sub>14</sub>H<sub>15</sub>FONa 241.1005; found 241.1007.

### 2-methyl-1-(p-tolyl)hept-6-yn-1-one

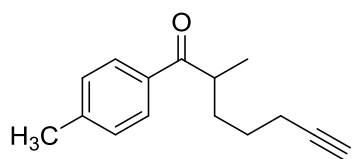

Prepared under general conditions in reaction of 1-(p-tolyl)propan-1-one (2.22 g, 15.0 mmol) and 5-iodopent-1-yne (2.33 g, 12.0 mmol). Product was isolated after column chromatography as pale yellow oil (790 mg, 3.69 mmol, 31%). <sup>1</sup>H NMR (400 MHz, CDCl<sub>3</sub>) δ 7.88 – 7.83 (m, 2H), 7.29 – 7.23 (m, 2H), 3.51 – 3.41 (m, 1H), 2.41 (s, 3H), 2.22 – 2.13 (m, 2H), 1.96 – 1.86 (m, 2H), 1.62 – 1.49 (m, 3H), 1.19 (d, *J* = 6.9 Hz, 3H). <sup>13</sup>C NMR (101 MHz, CDCl<sub>3</sub>) δ 203.6, 143.6, 134.1, 129.3, 128.4, 84.1, 68.5, 40.0, 32.7, 26.3, 21.6, 18.5, 17.4. HRMS (ESI): *m/z* calcd for C<sub>15</sub>H<sub>18</sub>ONa 237.1255; found 237.1257.

### 1-(4-methoxyphenyl)-2-methylhept-6-yn-1-one

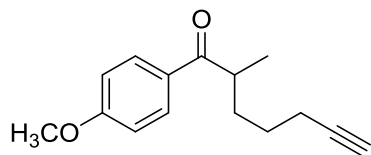

Prepared under general conditions in reaction of 1-(4-methoxyphenyl)propan-1-one (2.46 g, 15.0 mmol) and 5-iodopent-1-yne (2.33 g, 12.0 mmol). Product was isolated after column chromatography as pale yellow oil (1.13 g, 4.91 mmol, 41%). <sup>1</sup>H NMR (400 MHz, CDCl<sub>3</sub>) δ 7.97 – 7.92 (m, 2H), 6.96 – 6.90 (m, 2H), 3.86 (s, 3H), 3.45 (h, *J* = 6.6 Hz, 1H), 2.18 (td, *J* = 6.8, 2.6 Hz, 2H), 1.96 – 1.84 (m, 2H), 1.60 – 1.49 (m, 3H), 1.19 (d, *J* = 6.8 Hz, 3H). <sup>13</sup>C NMR (101 MHz, CDCl<sub>3</sub>) δ 202.5, 163.4, 130.5, 129.6, 113.8, 84.1, 68.5, 55.4, 39.7, 32.7, 26.3, 18.5, 17.5. HRMS (ESI): *m/z* calcd for C<sub>15</sub>H<sub>18</sub>O<sub>2</sub>Na 253.1204; found 253.1202.

### 2-isopropyl-1-phenylhept-6-yn-1-one

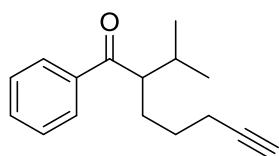

Prepared under general conditions in reaction of 3-methyl-1-phenylbutan-1-one (2.43 g, 15 mmol) and 5-iodopent-1-yne (2.33 g, 12.0 mmol). Product was isolated after column chromatography as pale yellow oil (1.99 g, 8.72 mmol, 73%). <sup>1</sup>H NMR (400 MHz, CDCl<sub>3</sub>) δ 7.97 – 7.92 (m, 2H), 7.58 – 7.52 (m, 1H), 7.49 – 7.43 (m, 2H), 3.28 (ddd, *J* = 10.0, 6.5, 3.4 Hz, 1H), 2.15 (tdd, *J* = 7.0, 2.7, 1.0 Hz, 2H), 2.04 (dt, *J* = 13.5, 6.7 Hz, 1H), 1.97 – 1.86 (m, 2H), 1.69 (dddd, *J* = 13.5, 10.7, 5.8, 3.4 Hz, 1H), 1.53 – 1.32 (m, 2H), 0.93 (dd, *J* = 11.6, 6.8 Hz, 6H). <sup>13</sup>C NMR (101 MHz, CDCl<sub>3</sub>) δ 204.2, 138.3, 132.8, 128.6, 128.1, 84.1, 68.5, 52.0, 30.7, 27.7, 26.6, 21.3, 19.3, 18.6. HRMS (ESI): *m/z* calcd for C<sub>16</sub>H<sub>20</sub>ONa 251.1412; found 251.1413.

### 2-methoxy-1-phenylhept-6-yn-1-one

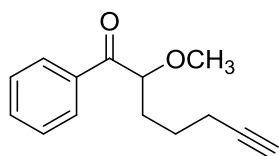

Prepared under general conditions in reaction of 2-methoxy-1-phenylethan-1-one (2.25 g, 15.0 mmol) and 5-iodopent-1-yne (2.33 g, 12.0 mmol). Product was isolated after column chromatography on silica gel as oil (1.17g, 5.41 mmol, 45%). <sup>1</sup>H NMR (400 MHz, CDCl<sub>3</sub>) δ 8.08 – 8.02 (m, 2H), 7.61 – 7.53 (m, 1H), 7.49 – 7.42 (m, 2H), 4.48 (dd, *J* = 8.2, 4.7 Hz, 1H), 3.36 (s, 3H), 2.28 – 2.17 (m, 2H), 2.00 – 1.84 (m, 3H), 1.77 – 1.63 (m, 2H). <sup>13</sup>C NMR (101 MHz, CDCl<sub>3</sub>) δ 200.3, 135.0, 133.4, 128.7, 128.6, 84.2, 83.7, 68.8, 57.7, 31.8, 24.4, 18.0. HRMS (ESI): *m/z* calcd for C<sub>14</sub>H<sub>16</sub>O<sub>2</sub>Na 239.1048; found 239.1051.

### 4-methylnon-8-yn-3-one

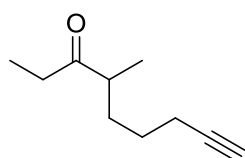

Prepared under general conditions in reaction of pentan-3-one (1.29 g, 15.0 mmol) and 5-iodopent-1-yne (2.33 g, 12.0 mmol). Product was isolated as oil after column chromatography on silica gel (1.11 g, 7.29, 61%). <sup>1</sup>H NMR (400 MHz, CDCl<sub>3</sub>) δ 2.59 – 2.49 (m, 1H), 2.49 – 2.38 (m, 1H), 2.23 – 2.10 (m, 2H), 1.81 – 1.66 (m, 1H), 1.57 – 1.35 (m, 4H), 1.13 – 0.98 (m, 6H). <sup>13</sup>C NMR (101 MHz, CDCl<sub>3</sub>) δ 214.9, 68.5, 45.6, 34.2, 32.0, 31.7, 26.1, 18.4, 16.4, 7.8. HRMS (ESI): *m/z* calcd for C<sub>10</sub>H<sub>16</sub>ONa 175.1099; found 175.1098.

### 1,2-diphenylethan-1-one

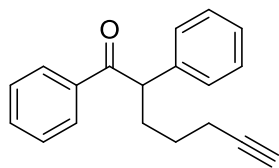

Prepared in reaction of 1,2-diphenylethan-1-one (3.92 g, 20.0 mmol) and 5-iodopent-1-yne (3.50 g, 18.0 mmol) under general conditions. Product was isolated as yellow solid after column chromatography on silica gel (1.45 g, 5.53 mmol, 31%)  $^1\text{H}$  NMR (500 MHz,  $\text{CDCl}_3$ )  $\delta$  8.00 – 7.95 (m, 2H), 7.50 – 7.44 (m, 1H), 7.41 – 7.26 (m, 5H), 7.22 – 7.16 (m, 1H), 4.59 (t,  $J = 7.3$  Hz, 1H), 2.35 – 2.24 (m, 1H), 2.21 (td,  $J = 7.2, 2.5$  Hz, 2H), 2.04 – 1.92 (m, 2H), 1.62 – 1.42 (m, 2H).  $^{13}\text{C}$  NMR (126 MHz,  $\text{CDCl}_3$ )  $\delta$  199.5, 139.3, 136.7, 132.8, 128.9, 128.6, 128.4, 128.1, 127.0, 84.0, 68.6, 53.1, 33.0, 26.4, 18.4. HRMS (EI):  $m/z$  calcd for  $\text{C}_{19}\text{H}_{18}\text{O}$  262.1436; found 262.1438.

### Synthesis of 1-(2-methyl-1-phenylhept-1-en-6-yn-1-yl)pyrrolidine (3). General procedure for the synthesis of acetylenic enamines.

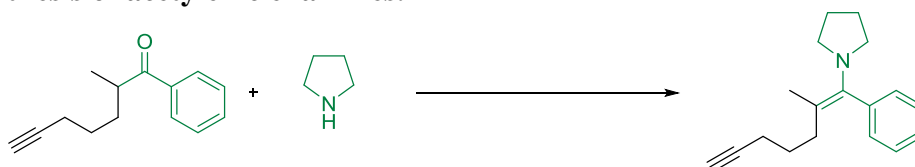

To solution of 2-methyl-1-phenylhept-6-yn-1-one **1** (1.00 g, 5.0 mmol, 1.0 equiv) and pyrrolidine (1.78 g, 25 mmol, 5.0 equiv) in 50 ml toluene at 0 °C,  $\text{TiCl}_4$  (5 ml, 5.0 mmol, 1.0 M solution in toluene) was added dropwise, then ice bath was removed, reaction was allowed to reach room temperature and ran overnight. Next mixture was diluted with 200 ml of  $\text{Et}_2\text{O}$  and filtered through 5G funnel to remove all precipitated  $\text{TiO}_2$ , concentrated and dried under reduced pressure to provide crude **3** (1.27, 5.0 mmol, quant). Enamine was formed as a 1:2 mixture of *E/Z* isomers. Dry product was used without any further purification.  $^1\text{H}$  NMR (400 MHz, Chloroform-*d*)  $\delta$  7.34 – 7.28 (m, 2H), 7.26 – 7.21 (m, 1H), 7.11 – 7.06 (m, 2H), 2.87 – 2.77 (m, 4H), 2.48 – 2.42 (m,  $\frac{1}{3} \cdot 1\text{H}$ ), 2.28 (td,  $J = 7.3, 2.7$  Hz,  $\frac{1}{3} \cdot 1\text{H}$ ), 2.02 – 1.96 (m,  $\frac{2}{3} \cdot 2\text{H}$ ), 1.95 – 1.89 (m,  $\frac{2}{3} \cdot 2\text{H}$ ), 1.86 (s,  $\frac{2}{3} \cdot 3\text{H}$ ), 1.83 (t,  $J = 2.7$  Hz, 1H), 1.79 – 1.70 (m, 5H), 1.62 – 1.53 (m,  $\frac{2}{3} \cdot 2\text{H}$ ), 1.48 (s,  $\frac{1}{3} \cdot 3\text{H}$ );  $^{13}\text{C}$  NMR (101 MHz,  $\text{CDCl}_3$ )  $\delta$  major isomer: 142.9, 138.8, 129.5, 127.71, 126.5, 121.2, 84.5, 68.0, 51.0, 33.7, 27.8, 24.9, 18.0, 17.2; minor isomer: 142.2, 138.8, 129.6, 127.67, 126.4, 123.9, 84.8, 68.1, 51.3, 32.1, 27.1, 24.8, 18.4, 18.3;

No chlorine in crude enamine **3** was detected by elemental analysis. No significant amount of ketone **1** in crude enamine **3** was detected by  $^1\text{H}$  NMR.

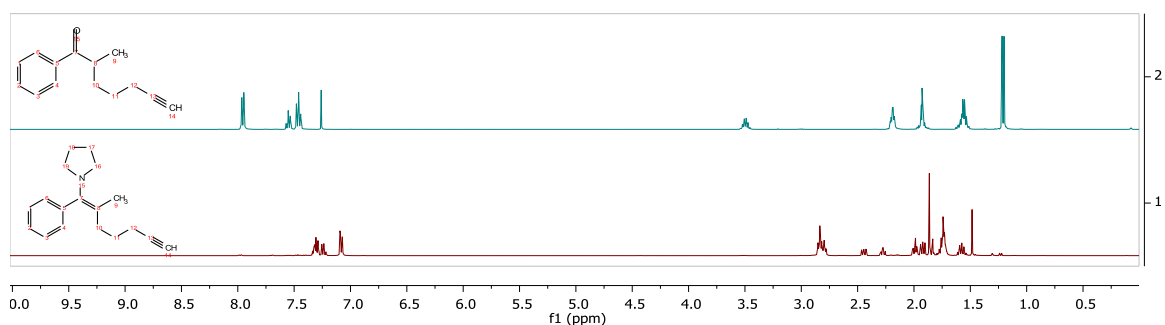

## General procedure for Pd-catalyzed cyclization/coupling of acetylenic enamines and aryl triflates

In a glovebox, to a 4-mL screw-capped vial containing Pd(dba)<sub>2</sub> (11.5 mg, 20 μmol, 5 mol%) and RuPhos (18.7 mg, 40 μmol, 10 mol%) following reagents were added: crude acetylenic enamine (0.400 mmol, 1 equiv), aryl trifluoromethanesulfonate (0.500 mmol, 1.25 equiv), NaHMDS (3.7 mg, 20 μmol, 5 mol%) and dry acetone (0.5 ml). Then, magnetic stirring bar was placed and the vial was sealed with a cap containing a PTFE seal. The reaction mixture was stirred at 80 °C for 24 h and then cooled to room temperature, quenched with sat. aqueous NH<sub>4</sub>Cl (10 mL), extracted with MTBE (3 x 10 mL). Combined organic phase were dried over anhydrous Na<sub>2</sub>SO<sub>4</sub>, concentrated and purified by column chromatography on silica gel.

### (E)-(2-benzylidene-1-methylcyclopentyl)(phenyl)methanone (4)

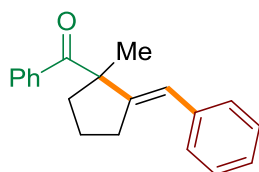

Prepared in reaction of 1-(2-methyl-1-phenylhept-1-en-6-yn-1-yl)pyrrolidine (101.2 mg, 0.400 mmol) and phenyl trifluoromethanesulfonate (113.1 mg, 0.500 mmol) under general conditions (96.1 mg, 0.348 mmol, 87%). Product was isolated as oil after column chromatography on silica gel (15g, hex/AcOEt 95:5). <sup>1</sup>H NMR (400 MHz, CDCl<sub>3</sub>) δ 7.80 – 7.72 (m, 2H), 7.47 – 7.40 (m, 1H), 7.38 – 7.29 (m, 6H), 7.24 – 7.18 (m, 1H), 6.23 (t, *J* = 2.6 Hz, 1H), 3.06 – 2.91 (m, 2H), 2.44 – 2.34 (m, 1H), 2.13 – 2.03 (m, 1H), 2.02 – 1.88 (m, 1H), 1.77 – 1.70 (m, 1H), 1.49 (s, 3H). <sup>13</sup>C NMR (101 MHz, CDCl<sub>3</sub>) δ 204.9, 150.4, 137.9, 137.2, 131.2, 128.9, 128.3, 128.2, 128.0, 126.5, 123.9, 60.4, 38.6, 32.3, 26.0, 24.9. IR (CH<sub>2</sub>Cl<sub>2</sub>): 2965, 1671, 1596, 1445, 1265, 1176, 1007, 963, 759, 695 cm<sup>-1</sup>. MS (EI): *m/z* (%) = 276(4)[M<sup>+</sup>], 226(2), 202(1), 184(4), 173(7), 172(16), 171(100), 170(11), 155(4), 143(5), 129(15), 122(64), 115(3), 106(9), 105(89), 97(4), 91(20), 77(34), 43(3). HRMS (EI): *m/z* calcd for C<sub>20</sub>H<sub>20</sub>O 276.1514; found 276.1502.

### (E)-(1-methyl-2-(naphthalen-2-ylmethylene)cyclopentyl)(phenyl)methanone (5)

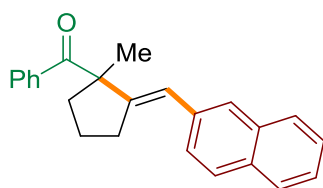

Prepared in reaction of 1-(2-methyl-1-phenylhept-1-en-6-yn-1-yl)pyrrolidine (101.4 mg, 0.400 mmol) and naphthalen-2-yl trifluoromethanesulfonate (138.7 mg, 0.502 mmol) under general conditions (53.5 mg, 0.164 mmol, 41%). Product was isolated as oil after column chromatography on silica gel (15, hex/AcOEt 95:5). <sup>1</sup>H NMR (400 MHz, CDCl<sub>3</sub>) δ 7.85 – 7.74 (m, 6H), 7.51 – 7.41 (m, 4H), 7.40 – 7.33 (m, 2H), 6.39 (t, *J* = 2.7 Hz, 1H), 3.16 – 3.02 (m, 2H), 2.48 – 2.38 (m, 1H), 2.17 – 2.07 (m, 1H), 2.05 – 1.92 (m, 1H), 1.81 – 1.73 (m, 1H), 1.55 (s, 3H). <sup>13</sup>C NMR (101 MHz, CDCl<sub>3</sub>) δ 205.0, 151.1, 137.4, 135.6, 133.5, 132.1, 131.3, 129.0, 128.1, 128.0, 127.8, 127.6, 127.0, 126.7, 126.2, 125.8, 124.1, 60.6, 38.7, 32.5, 26.1, 25.0. IR (CH<sub>2</sub>Cl<sub>2</sub>): 2962, 1670, 1596, 1445, 1263, 1175, 1007, 963, 816, 706 cm<sup>-1</sup>. HRMS (ESI): *m/z* calcd for C<sub>24</sub>H<sub>22</sub>ONa 349.1568; found 349.1568.

### (E)-(1-methyl-2-(naphthalen-1-ylmethylene)cyclopentyl)(phenyl)methanone (6)

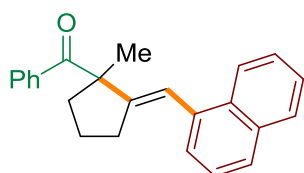

Prepared in reaction of 1-(2-methyl-1-phenylhept-1-en-6-yn-1-yl)pyrrolidine (101.4 mg, 0.400 mmol) and naphthalen-1-yl trifluoromethanesulfonate (138.2 mg, 0.501 mmol) under general conditions (82.2 mg, 0.252 mmol, 63%). Product was isolated as oil after column chromatography on silica gel (15g, hex/AcOEt 9:1). <sup>1</sup>H NMR (400 MHz, CDCl<sub>3</sub>) δ 7.93 – 7.88 (m, 2H), 7.87 – 7.82 (m, 1H), 7.79 – 7.71 (m, 2H), 7.54 – 7.37 (m, 7H), 6.78 (t, *J* = 2.6 Hz, 1H), 2.86 – 2.79 (m, 2H), 2.55 – 2.45 (m, 1H), 2.07 – 1.96 (m, 1H), 1.96 – 1.86 (m, 1H), 1.85 – 1.78 (m, 1H), 1.66 (s, 3H). <sup>13</sup>C NMR (101 MHz, CDCl<sub>3</sub>) δ 204.9, 152.5, 137.2, 135.1, 133.5, 131.7, 131.3, 129.0, 128.3, 128.0, 127.1, 125.8, 125.7, 125.4, 125.2, 124.4, 121.4, 59.7, 39.0, 31.6, 26.6, 24.3. IR (CH<sub>2</sub>Cl<sub>2</sub>): 2963, 1671, 1594, 1445, 1263, 1175, 1006, 963, 781, 705, cm<sup>-1</sup>. MS (EI): *m/z* (%) = 327(2), 326(7)[M<sup>+</sup>], 222(31), 221(100), 206(16), 205(6), 179(10), 165(6), 141(4), 105(9); HRMS (ESI): *m/z* calcd for C<sub>24</sub>H<sub>22</sub>ONa 349.1568; found 349.1566.

**(E)-(2-(4-methoxybenzylidene)-1-methylcyclopentyl)(phenyl)methanone (7)**

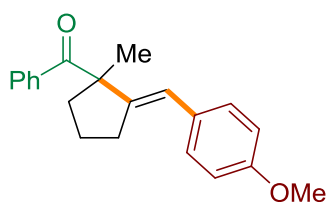

Prepared in reaction of 1-(2-methyl-1-phenylhept-1-en-6-yn-1-yl)pyrrolidine (101.8 mg, 0.402 mmol) and 4-methoxyphenyl trifluoromethanesulfonate (128.1 mg, 0.500 mmol) under general conditions (101.2 mg, 0.331 mmol, 82%). Product was isolated as oil after column chromatography on silica gel (15g, hex/AcOEt 98:2→97:3). <sup>1</sup>H NMR (400 MHz, CDCl<sub>3</sub>) δ 7.75 – 7.70 (m, 2H), 7.44 – 7.38 (m, 1H), 7.36 – 7.30 (m, 2H), 7.28 – 7.22 (m, 2H), 6.91 – 6.85 (m, 2H), 6.15 (t, *J* = 2.6 Hz, 1H), 3.80 (s, 3H), 3.01 – 2.86 (m, 2H), 2.41 – 2.31 (m, 1H), 2.11 – 2.01 (m, 1H), 1.98 – 1.88 (m, 1H), 1.74 – 1.66 (m, 1H), 1.47 (s, 3H). <sup>13</sup>C NMR (101 MHz, CDCl<sub>3</sub>) δ 205.1, 158.2, 148.0, 137.4, 131.1, 130.8, 129.4, 128.9, 127.9, 123.3, 113.7, 60.3, 55.2, 38.6, 32.2, 25.9, 24.9. IR (CH<sub>2</sub>Cl<sub>2</sub>): 2961, 1670, 1606, 1511, 1251, 1177, 1034, 707 cm<sup>-1</sup>. MS (EI): *m/z* (%) = 306(1)[M<sup>+</sup>], 281(1), 221(1), 215(3), 202(25), 201(100), 200(2), 173(3), 159(7), 145(3), 135(4), 121(17), 105(8), 93(3), 84(1), 77(2), 55(2); HRMS (ESI): *m/z* calcd for C<sub>21</sub>H<sub>22</sub>O<sub>2</sub>Na 329.1517; found 329.1514.

**(E)-(2-(3-methoxybenzylidene)-1-methylcyclopentyl)(phenyl)methanone (8)**

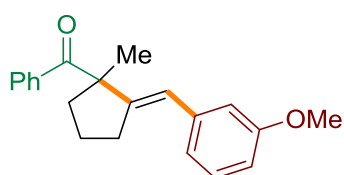

Prepared in reaction of 1-(2-methyl-1-phenylhept-1-en-6-yn-1-yl)pyrrolidine (103.9 mg, 0.400 mmol) and 3-methoxyphenyl trifluoromethanesulfonate (128.1 mg, 0.500 mmol) under general conditions (83.8 mg, 0.273 mmol, 68%). Product was isolated as oil after column chromatography on silica gel (25g, hex/AcOEt 98:2→95:5). <sup>1</sup>H NMR (500 MHz, CDCl<sub>3</sub>) δ 7.76 – 7.70 (m, 2H), 7.47 – 7.40 (m, 1H), 7.39 – 7.32 (m, 2H), 7.29 – 7.23 (m, 1H), 6.91 (dd, 1H), 6.86 (t, *J* = 2.1 Hz, 1H), 6.78 (dt, *J* = 8.2, 1.7 Hz, 1H), 6.18 (t, *J* = 2.6 Hz, 1H), 3.82 (s, 3H), 3.07 – 2.90 (m, 2H), 2.43 – 2.32 (m, 1H), 2.12 – 2.02 (m, 1H), 2.02 – 1.89 (m, 1H), 1.77 – 1.67 (m, 1H), 1.48 (s, 3H). <sup>13</sup>C NMR (126 MHz, CDCl<sub>3</sub>) δ 204.9, 159.6, 150.9, 139.4, 137.2, 131.2, 129.2, 128.9, 128.0, 123.8, 120.9, 113.9, 112.0, 60.5, 55.2, 38.7, 32.4, 26.0, 24.9. IR (CH<sub>2</sub>Cl<sub>2</sub>): 2961, 1670, 1597, 1577, 1263, 1174, 780, 707, 690 cm<sup>-1</sup>. HRMS (ESI): *m/z* calcd for C<sub>21</sub>H<sub>22</sub>O<sub>2</sub>Na 329.1517; found 329.1516.

**(E)-(1-methyl-2-(4-(methylthio)benzylidene)cyclopentyl)(phenyl)methanone (9)**

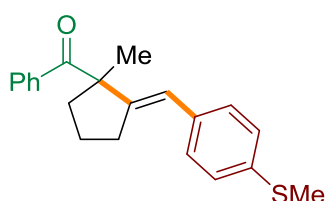

Prepared in reaction of 1-(2-methyl-1-phenylhept-1-en-6-yn-1-yl)pyrrolidine (101.1 mg, 0.399 mmol) and 4-(methylthio)phenyl trifluoromethanesulfonate (136.3 mg, 0.501 mmol) under general conditions (41.3 mg, 0.128 mmol, 32%). Product was isolated as oil after column chromatography on silica gel (15g, hex/AcOEt 9:1). <sup>1</sup>H NMR (400 MHz, CDCl<sub>3</sub>) δ 7.74 – 7.67 (m, 2H), 7.45 – 7.39 (m, 1H), 7.37 – 7.31 (m, 2H), 7.22 (s, 4H), 6.14 (t, *J* = 2.6 Hz, 1H), 2.99 – 2.87 (m, 2H), 2.48 (s, 3H), 2.40 – 2.31 (m, 1H), 2.13 – 2.00 (m, 1H), 2.01 – 1.88 (m, 1H), 1.75 – 1.67 (m, 1H), 1.46 (s, 3H). <sup>13</sup>C NMR (101 MHz, CDCl<sub>3</sub>) δ 205.0, 150.1, 137.3, 136.6, 135.0, 131.2, 128.9, 128.7, 128.0, 127.6, 126.6, 123.3, 121.7, 60.5, 38.7, 32.4, 26.0, 24.9, 15.9. IR (CH<sub>2</sub>Cl<sub>2</sub>): 2962, 2924, 1671, 1493, 1263, 1213, 1175, 1141, 1093, 1008, 963, 885, 809, 706 cm<sup>-1</sup>. MS (EI): *m/z* (%) = 322(4), 278(1), 237(1), 219(10), 218(28), 217(100), 205(2), 175(2), 170(8), 155(4), 137(30), 128(2), 105(11), 93(1), 71(1); HRMS (ESI): *m/z* calcd for C<sub>21</sub>H<sub>22</sub>ONaS 345.1289; found 345.1284.

**(E)-(1-methyl-2-(4-((trifluoromethyl)thio)benzylidene)cyclopentyl)(phenyl)methanone (10)**

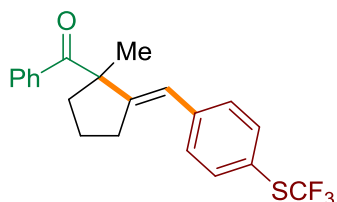

Prepared in reaction of 1-(2-methyl-1-phenylhept-1-en-6-yn-1-yl)pyrrolidine (101.9 mg, 0.402 mmol) and 4-((trifluoromethyl)thio)phenyl trifluoromethanesulfonate (163.70 mg, 0.502 mmol) under general conditions (133.2 mg, 0.354 mmol, 88%). Product was isolated as oil after column chromatography on silica gel (15g, hex/AcOEt 9:1→8:2). <sup>1</sup>H NMR (400 MHz, CDCl<sub>3</sub>) δ 7.75 – 7.69 (m, 2H), 7.60 (d, *J* = 8.1 Hz, 2H), 7.47 – 7.40 (m, 1H), 7.39 – 7.31 (m, 4H), 6.20 (t, *J* = 2.6 Hz, 1H), 3.01 – 2.93 (m, 2H), 2.45 – 2.36 (m, 1H), 2.15 – 2.05 (m, 1H), 2.03 – 1.90 (m, 1H), 1.78 – 1.71 (m, 1H), 1.48 (s, 3H). <sup>13</sup>C NMR (101 MHz, CDCl<sub>3</sub>) δ 204.4, 153.5, 140.5,



136.9, 136.3, 131.4, 131.1, 129.1, 128.9, 128.1, 128.0, 122.7, 121.8, 121.8, 60.6, 38.6, 32.4, 26.0, 24.8. IR (CH<sub>2</sub>Cl<sub>2</sub>): 2966, 1673, 1593, 1264, 1118, 1009, 963, 706 cm<sup>-1</sup>. MS (EI): m/z (%) = 377(1), 376(4), 273(6), 272(18), 271(79), 270(5), 229(3), 202(4), 191(16), 170(11), 155(4), 142(3), 128(2), 106(13), 105(100), 93(1), 77(4), 55(2); HRMS (EI): m/z calcd for C<sub>21</sub>H<sub>20</sub>OSF<sub>3</sub> 377.1187; found 377.1185.

**(E)-(2-(4-fluorobenzylidene)-1-methylcyclopentyl)(phenyl)methanone (11)**

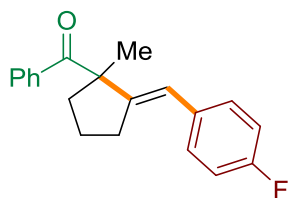

Prepared in reaction of 1-(2-methyl-1-phenylhept-1-en-6-yn-1-yl)pyrrolidine (101.7 mg, 0.401 mmol) and 4-fluorophenyl trifluoromethanesulfonate (122.6 mg, 0.502 mmol) under general conditions (63.6 mg, 0.216 mmol, 54%). Product was isolated as oil after column chromatography on silica gel (15g, hex/AcOEt 9:1). <sup>1</sup>H NMR (400 MHz, CDCl<sub>3</sub>) δ 7.75 – 7.67 (m, 2H), 7.47 – 7.39 (m, 1H), 7.37 – 7.31 (m, 2H), 7.29 – 7.21 (m, 2H), 7.01 (t, *J* = 8.7 Hz, 2H), 6.16 (t, *J* = 2.6 Hz, 1H), 2.98 – 2.85 (m, 2H), 2.43 – 2.32 (m, 1H), 2.12 – 2.01 (m, 1H), 2.01 – 1.86 (m, 1H), 1.47 (s, 3H). <sup>13</sup>C NMR (101 MHz, CDCl<sub>3</sub>) δ 204.8, 162.6, 160.1, 150.1, 150.0, 137.2, 134.10, 134.07, 131.2, 129.8, 129.7, 128.9, 128.0, 122.8, 115.3, 115.0, 60.3, 38.6, 32.1, 26.0, 24.9. IR (CH<sub>2</sub>Cl<sub>2</sub>): 2965, 1671, 1599, 1508, 1229, 1007, 963, 825, 705 cm<sup>-1</sup>. MS (EI): m/z (%) = 294(3), 277(3), 190(22), 189(100), 172(4), 161(3), 147(9), 109(17), 105(47), 97(3), 83(3), 71(4), 57(5); HRMS (APCI): m/z calcd for C<sub>20</sub>H<sub>20</sub>OF 295.1498; found 295.1507.

**(E)-(1-methyl-2-(4-(trifluoromethyl)benzylidene)cyclopentyl)(phenyl)methanone (12)**

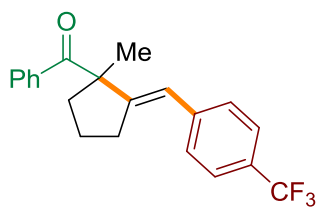

Prepared in reaction of 1-(2-methyl-1-phenylhept-1-en-6-yn-1-yl)pyrrolidine (101.0 mg, 0.399 mmol) and 4-(trifluoromethyl)phenyl trifluoromethanesulfonate (147.2 mg, 0.501 mmol) under general conditions (60.6 mg, 0.176 mmol, 44%). Product was isolated as oil after column chromatography on silica gel (15g, hex/AcOEt 98:2). <sup>1</sup>H NMR (400 MHz, CDCl<sub>3</sub>) δ 7.74 – 7.68 (m, 2H), 7.57 (d, *J* = 8.3 Hz, 2H), 7.46 – 7.41 (m, 1H), 7.41 – 7.32 (m, 4H), 6.22 (t, *J* = 2.6 Hz, 1H), 3.01 – 2.93 (m, 2H), 2.45 – 2.36 (m, 1H), 2.15 – 2.04 (m, 1H), 2.02 – 1.90 (m, 1H), 1.79 – 1.72 (m, 1H), 1.49 (s, 3H). <sup>13</sup>C NMR (101 MHz, CDCl<sub>3</sub>) δ 204.5, 153.5, 141.4, 137.0, 131.4, 128.9, 128.3, 128.1, 125.3, 125.2, 125.2, 122.8, 60.6, 38.6, 32.4, 26.0, 24.8. IR (CH<sub>2</sub>Cl<sub>2</sub>): 2965, 1673, 1614, 1326, 1166, 1122, 1068, 706 cm<sup>-1</sup>. HRMS (EI): m/z calcd for C<sub>21</sub>H<sub>19</sub>OF<sub>3</sub> 344.1388; found 344.1390.

**(E)-4-((2-benzoyl-2-methylcyclopentylidene)methyl)benzonitrile (13)**

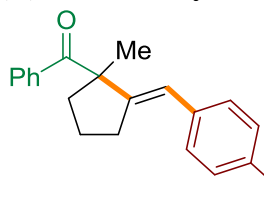

Prepared in reaction of 1-(2-methyl-1-phenylhept-1-en-6-yn-1-yl)pyrrolidine (101.8 mg, 0.402 mmol) and 4-cyanophenyl trifluoromethanesulfonate (125.6 mg, 0.500 mmol) under general conditions (116.3 mg, 0.385 mmol, 96%). Product was isolated as oil after column chromatography on silica gel (15g, hex/AcOEt 95:5→9:1). <sup>1</sup>H NMR (400 MHz, CDCl<sub>3</sub>) δ 7.71 – 7.66 (m, 2H), 7.61 – 7.56 (m, 2H), 7.47 – 7.41 (m, 1H), 7.38 – 7.32 (m, 4H), 6.19 (t, *J* = 2.7 Hz, 1H), 2.99 – 2.92 (m, 2H), 2.41 (ddd, *J* = 12.8, 10.5, 7.4 Hz, 1H), 2.15 – 2.05 (m, 1H), 2.02 – 1.90 (m, 1H), 1.75 (ddd, *J* = 12.9, 7.1, 3.1 Hz, 1H), 1.48 (s, 3H). <sup>13</sup>C NMR (101 MHz, CDCl<sub>3</sub>) δ 204.1, 155.1, 142.4, 136.8, 132.1, 131.5, 128.8, 128.6, 128.1, 122.6, 119.0, 109.7, 60.8, 38.5, 32.5, 26.0, 24.8. IR (CH<sub>2</sub>Cl<sub>2</sub>): 2967, 2225, 1672, 1602, 1264, 1175, 963, 706, 554 cm<sup>-1</sup>. MS (EI): m/z (%) = 301(2), 286(1), 258(1), 197(2), 196(13), 168(1), 158(8), 154(3), 134(2), 116(4), 106(15), 105(100), 97(1), 77(4); HRMS (APCI): m/z calcd for C<sub>21</sub>H<sub>20</sub>NO 302.1545; found 302.1549.

**Methyl (E)-4-((2-benzoyl-2-methylcyclopentylidene)methyl)benzoate (14)**

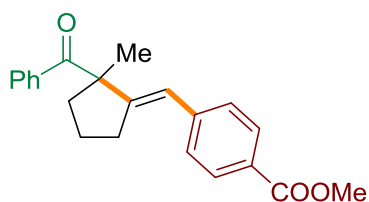

Prepared in reaction of 1-(2-methyl-1-phenylhept-1-en-6-yn-1-yl)pyrrolidine (101.6 mg, 0.401 mmol) and methyl 4-((trifluoromethyl)sulfonyl)oxybenzoate (142.3 mg, 0.501 mmol) under general conditions (93.4 mg, 0.280 mmol, 70%). Product was isolated as oil after column chromatography on silica gel (15g,

hex/AcOEt 95:5).  $^1\text{H}$  NMR (400 MHz,  $\text{CDCl}_3$ )  $\delta$  7.98 (d,  $J = 8.1$  Hz, 2H), 7.71 (d,  $J = 7.4$  Hz, 2H), 7.42 (t,  $J = 7.3$  Hz, 1H), 7.38 – 7.30 (m, 4H), 6.22 (d,  $J = 2.6$  Hz, 1H), 3.89 (s, 3H), 3.02 – 2.93 (m, 2H), 2.44 – 2.34 (m, 1H), 2.13 – 2.02 (m, 1H), 1.76 – 1.69 (m, 1H), 1.47 (s, 3H).  $^{13}\text{C}$  NMR (101 MHz,  $\text{CDCl}_3$ )  $\delta$  204.4, 166.8, 153.5, 142.4, 136.9, 131.3, 129.6, 128.8, 128.0, 127.8, 123.2, 60.6, 51.9, 38.6, 32.5, 25.9, 24.8. IR ( $\text{CH}_2\text{Cl}_2$ ): 2953, 1720, 1672, 1605, 1436, 1280, 1180, 1110, 707  $\text{cm}^{-1}$ . MS (EI):  $m/z$  (%) = 355(1), 327(1), 307(1), 305(7), 292(3), 269(1), 230(3), 229(18), 222(5), 181(2), 180(7), 164(13), 149(14), 133(14), 122(100), 105(93), 97(6), 86(12), 84(19), 77(19), 71(9), 57(11), 43(7); HRMS (ESI):  $m/z$  calcd for  $\text{C}_{22}\text{H}_{22}\text{O}_3\text{Na}$  357.1467; found 357.1465.

**(E)-4-((2-benzoyl-2-methylcyclopentylidene)methyl)benzaldehyde (15)**

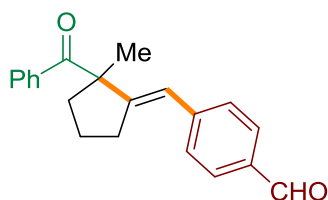

Prepared in reaction of 1-(2-methyl-1-phenylhept-1-en-6-yn-1-yl)pyrrolidine (101.5 mg, 0.401 mmol) and 4-formylphenyl trifluoromethanesulfonate (126.8 mg, 0.499 mmol) under general conditions (88.9 mg, 0.292 mmol, 73 %). Product was isolated as oil after column chromatography on silica gel (15g, hex/AcOEt 9:1).  $^1\text{H}$  NMR (400 MHz,  $\text{CDCl}_3$ )  $\delta$  9.97 (s, 1H), 7.87 – 7.80 (m, 2H), 7.73 – 7.67 (m, 2H), 7.47 – 7.40 (m, 3H), 7.38 – 7.32 (m, 2H), 6.24 (t,  $J = 2.6$  Hz, 1H), 3.03 – 2.97 (m, 2H), 2.46 – 2.35 (m, 1H), 2.16 – 2.06 (m, 1H), 2.04 – 1.89 (m, 1H), 1.80 – 1.70 (m, 1H), 1.49 (s, 3H).  $^{13}\text{C}$  NMR (101 MHz,  $\text{CDCl}_3$ )  $\delta$  204.3, 191.6, 154.8, 144.0, 136.9, 134.3, 131.5, 129.8, 128.9, 128.7, 128.1, 123.2, 60.8, 38.6, 32.6, 26.0, 24.9. IR ( $\text{CH}_2\text{Cl}_2$ ): 2963, 2928, 1694, 1673, 1601, 1263, 1214, 1172, 707  $\text{cm}^{-1}$ . MS (EI):  $m/z$  (%) = 305(1), 304(22), 303(11), 287(7), 276(2), 229(2), 215(9), 199(25), 198(24), 171(14), 155(6), 141(7), 129 (15), 115(11), 106(16), 105(100), 91(22), 77(29), 51(8).

**(E)-1-(4-((2-benzoyl-2-methylcyclopentylidene)methyl)phenyl)ethan-1-one (16)**

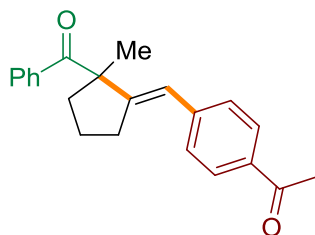

Prepared in reaction of 1-(2-methyl-1-phenylhept-1-en-6-yn-1-yl)pyrrolidine (101.9 mg, 0.402 mmol) and 4-acetylphenyl trifluoromethanesulfonate (134.6 mg, 0.502 mmol) under general conditions (105.6mg, 0.332 mmol, 83 %). Product was isolated as oil after column chromatography on silica gel (15g, hex/AcOEt 9:1).  $^1\text{H}$  NMR (400 MHz,  $\text{CDCl}_3$ )  $\delta$  7.94 – 7.89 (m, 2H), 7.73 – 7.67 (m, 2H), 7.47 – 7.40 (m, 1H), 7.39 – 7.31 (m, 4H), 6.23 (t,  $J = 2.6$  Hz, 1H), 3.03 – 2.95 (m, 2H), 2.58 (s, 3H), 2.44 – 2.35 (m, 1H), 2.15 – 2.04 (m, 1H), 2.02 – 1.89 (m, 1H), 1.78 – 1.70 (m, 1H), 1.48 (s, 3H).  $^{13}\text{C}$  NMR (101 MHz,  $\text{CDCl}_3$ )  $\delta$  204.4, 197.5, 153.9, 142.6, 137.0, 134.9, 131.4, 128.9, 128.4, 128.3, 128.1, 123.2, 60.7, 38.6, 32.6, 26.5, 26.0, 24.9. IR ( $\text{CH}_2\text{Cl}_2$ ): 2965, 1680, 1600, 1359, 1268, 1177, 961, 709  $\text{cm}^{-1}$ . MS (EI):  $m/z$  (%) = 319(4), 318(12)[ $\text{M}^+$ ], 276(2), 213(48), 212(21), 198(2), 171(7), 169(10), 155(5), 141(7), 106(10), 105(100), 91(5), 77(38), 51(10), 43(65); HRMS (EI):  $m/z$  calcd for  $\text{C}_{22}\text{H}_{22}\text{O}_2$  318.1620; found 318.1624.

**(E)-1-(2-((2-benzoyl-2-methylcyclopentylidene)methyl)phenyl)ethan-1-one (17)**

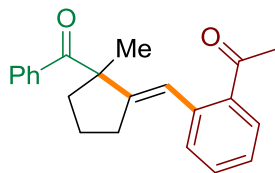

Prepared in reaction of 1-(2-methyl-1-phenylhept-1-en-6-yn-1-yl)pyrrolidine (103.9 mg, 0.401 mmol) and 2-acetylphenyl trifluoromethanesulfonate (134.1 mg, 0.500 mmol) under general conditions (63.9 mg, 0.201 mmol, 50%). Product was isolated as oil after column chromatography on silica gel (25g, hex/AcOEt 98:2→90:10).  $^1\text{H}$  NMR (500 MHz,  $\text{CDCl}_3$ )  $\delta$  7.80 – 7.76 (m, 2H), 7.62 (dd,  $J = 7.7, 1.4$  Hz, 1H), 7.48 – 7.42 (m, 2H), 7.41 – 7.36 (m, 2H), 7.35 – 7.26 (m, 2H), 6.49 (t,  $J = 2.6$  Hz, 1H), 2.78 – 2.68 (m, 2H), 2.46 (s, 3H), 2.45 – 2.38 (m, 1H), 2.02 – 1.92 (m, 1H), 1.90 – 1.80 (m, 1H), 1.77 – 1.70 (m, 1H), 1.55 (s, 3H).  $^{13}\text{C}$  NMR (126 MHz,  $\text{CDCl}_3$ )  $\delta$  204.6, 201.9, 151.1, 138.3, 137.3, 131.3, 131.0, 129.3, 128.8, 128.6, 128.0, 126.6, 123.2, 59.6, 38.9, 31.7, 29.9, 25.6, 24.4. IR ( $\text{CH}_2\text{Cl}_2$ ): 2964, 1680, 1596, 1426, 1248, 768, 706  $\text{cm}^{-1}$ . HRMS (EI):  $m/z$  calcd for  $\text{C}_{22}\text{H}_{22}\text{O}_2$  318.1620; found 318.1622.

**(E)-(1-methyl-2-(4-nitrobenzylidene)cyclopentyl)(phenyl)methanone (18)**

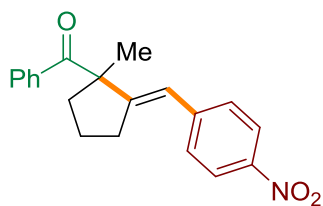

Prepared in reaction of 1-(2-methyl-1-phenylhept-1-en-6-yn-1-yl)pyrrolidine (101.3 mg, 0.400 mmol) and 4-nitrophenyl trifluoromethanesulfonate (134.2 mg, 0.495 mmol) under general conditions (111.7 mg, 0.348 mmol, 87 %). Product was isolated as oil after column chromatography on silica gel (15g, hex/AcOEt 9:1→8:2). <sup>1</sup>H NMR (400 MHz, CDCl<sub>3</sub>) δ 8.20 – 8.14 (m, 2H), 7.72 – 7.66 (m, 2H), 7.48 – 7.32 (m, 5H), 6.25 (t, *J* = 2.6 Hz, 1H), 3.04 – 2.95 (m, 2H), 2.48 – 2.38 (m, 1H), 2.17 – 2.06 (m, 1H), 2.05 – 1.91 (m, 1H), 1.81 – 1.73 (m, 1H), 1.49 (s, 3H). <sup>13</sup>C NMR (101 MHz, CDCl<sub>3</sub>) δ 204.0, 156.0, 145.9, 144.4, 136.7, 131.6, 128.8, 128.7, 128.1, 123.7, 122.3, 60.9, 38.6, 32.6, 26.0, 24.8. IR (CH<sub>2</sub>Cl<sub>2</sub>): 2965, 1671, 1594, 1514, 1343, 1262, 1175, 1109, 709 cm<sup>-1</sup>. MS (EI): *m/z* (%) = 321(3), 305(2), 216(7), 200(22), 170(9), 155(10), 142(8), 128(9), 115(9), 106(17), 105(100), 91(4), 78(7), 77(30), 51(9); HRMS (EI): *m/z* calcd for C<sub>20</sub>H<sub>19</sub>NO<sub>3</sub> 321.1365; found 321.1380.

**(E)-(1-methyl-2-(2-nitrobenzylidene)cyclopentyl)(phenyl)methanone (19)**

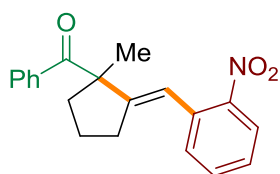

Prepared in reaction of 1-(2-methyl-1-phenylhept-1-en-6-yn-1-yl)pyrrolidine (101.6 mg, 0.401 mmol) and 2-nitrophenyl trifluoromethanesulfonate (135.1 mg, 0.498 mmol) under general conditions (127.2 mg, 0.396 mmol, 99%). Product was isolated as oil after column chromatography on silica gel (15g, hex/AcOEt 8:2). <sup>1</sup>H NMR (400 MHz, CDCl<sub>3</sub>) δ 7.92 (dd, *J* = 8.2, 1.4 Hz, 1H), 7.81 – 7.75 (m, 2H), 7.55 (td, *J* = 7.6, 1.4 Hz, 1H), 7.49 – 7.43 (m, 1H), 7.42 – 7.32 (m, 4H), 6.47 (t, *J* = 2.6 Hz, 1H), 2.81 – 2.69 (m, 1H), 2.69 – 2.59 (m, 1H), 2.49 – 2.38 (m, 1H), 2.04 – 1.92 (m, 1H), 1.92 – 1.80 (m, 1H), 1.80 – 1.71 (m, 1H), 1.54 (s, 3H). <sup>13</sup>C NMR (101 MHz, CDCl<sub>3</sub>) δ 204.1, 153.4, 147.9, 136.9, 133.2, 132.6, 131.4, 130.5, 128.8, 128.0, 127.4, 124.4, 119.6, 59.7, 38.9, 31.5, 25.8, 24.2. IR (CH<sub>2</sub>Cl<sub>2</sub>): 2967, 1671, 1523, 1343, 1264, 1175, 708 cm<sup>-1</sup>. MS (EI): *m/z* (%) = 304(1), 287(1), 235(5), 234(31), 216(7), 215(23), 200(25), 199(9), 182(13), 170(5), 156(4), 131(7), 128(2), 106(8), 105(100), 91(4), 84(6), 57(3). HRMS (ESI): *m/z* calcd for C<sub>20</sub>H<sub>19</sub>NO<sub>3</sub>Na 344.1263; found 344.1265.

**(E)-(1-methyl-2-(pyridin-3-ylmethylene)cyclopentyl)(phenyl)methanone (20)**

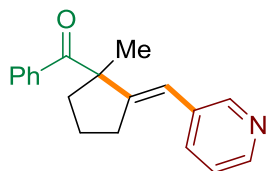

Prepared in reaction of 1-(2-methyl-1-phenylhept-1-en-6-yn-1-yl)pyrrolidine (101.5 mg, 0.401 mmol) and pyridin-3-yl trifluoromethanesulfonate (141.1 mg, 0.500 mmol) under general conditions (102.8 mg, 0.370 mmol, 93%). Product was isolated as oil after column chromatography on silica gel (15g, hex/AcOEt 9:1→8:2). <sup>1</sup>H NMR (400 MHz, CDCl<sub>3</sub>) δ 8.52 (d, *J* = 2.3 Hz, 1H), 8.38 (dd, *J* = 4.8, 1.6 Hz, 1H), 7.71 – 7.65 (m, 2H), 7.54 (dt, *J* = 8.0, 2.0 Hz, 1H), 7.42 – 7.37 (m, 1H), 7.34 – 7.28 (m, 2H), 7.20 (ddd, *J* = 7.9, 4.8, 0.8 Hz, 1H), 6.12 (t, *J* = 2.6 Hz, 1H), 2.95 – 2.88 (m, 2H), 2.43 – 2.32 (m, 1H), 2.10 – 2.00 (m, 1H), 1.98 – 1.86 (m, 1H), 1.74 – 1.67 (m, 1H), 1.45 (s, 3H). <sup>13</sup>C NMR (101 MHz, CDCl<sub>3</sub>) δ 204.3, 153.2, 149.4, 147.2, 136.8, 134.7, 133.5, 131.3, 128.7, 128.0, 123.1, 120.3, 60.4, 38.6, 32.3, 25.9, 24.7. IR (CH<sub>2</sub>Cl<sub>2</sub>): 2964, 1671, 1264, 1175, 1007, 962, 708 cm<sup>-1</sup>. MS (EI): *m/z* (%) = 278(13) [M<sup>+</sup>], 277(58), 269(1), 219(2), 173(10), 172(68), 171(5), 157(2), 144(3), 130(5), 122(2), 106(13), 105(100), 92(8), 71(3), 69(5), 57(4); HRMS (EI): *m/z* calcd for C<sub>19</sub>H<sub>20</sub>NO 278.1545; found 278.1540.

**(E)-(1-methyl-2-(quinolin-2-ylmethylene)cyclopentyl)(phenyl)methanone (21)**

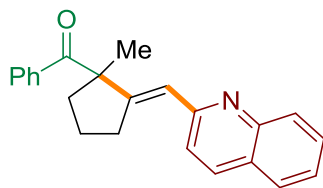

Prepared in reaction of 1-(2-methyl-1-phenylhept-1-en-6-yn-1-yl)pyrrolidine (101.5 mg, 0.400 mmol) and quinolin-2-yl trifluoromethanesulfonate (139.7 mg, 0.504 mmol) under general conditions (99.5 mg, 0.304 mmol, 76%). Product was isolated as oil after column chromatography on silica gel (15g, hex/AcOEt 85:15). <sup>1</sup>H NMR (400 MHz, CDCl<sub>3</sub>) δ 8.05 (ddd, *J* = 16.4, 8.5, 0.9 Hz, 2H), 7.80 – 7.71 (m, 3H), 7.70 – 7.64 (m, 1H), 7.50 – 7.38 (m, 2H), 7.36 – 7.30 (m, 2H), 7.29 – 7.23 (m, 1H), 6.42 (t, *J* = 2.6 Hz, 1H), 3.68 – 3.58 (m, 1H), 3.39 – 3.25 (m, 1H), 2.48 –

2.35 (m, 1H), 2.20 – 2.09 (m, 2H), 2.07 – 1.94 (m, 1H), 1.81 – 1.72 (m, 1H), 1.53 (s, 3H). <sup>13</sup>C NMR (101 MHz, CDCl<sub>3</sub>) δ 204.5, 158.6, 156.8, 148.2, 136.9, 135.7, 131.4, 129.4, 129.3, 129.1, 128.0, 127.4, 126.3, 125.9, 123.2, 122.3, 61.0, 38.7, 33.6, 26.0, 24.9. IR (CH<sub>2</sub>Cl<sub>2</sub>): 3059, 2964, 1671, 1597, 1504, 1215, 1137, 960, 913, 845 cm<sup>-1</sup>. MS (EI): m/z (%) = 328(4)[M<sup>+</sup>], 327(20)[M<sup>+</sup>], 223(17), 222(100), 206(6), 194(5), 180(4), 143(14), 129(2), 105(15), 77(3). HRMS (EI): m/z calcd for C<sub>23</sub>H<sub>21</sub>NO 327.1701; found 327.1705.

**(E)-(1-methyl-2-(quinoxalin-2-ylmethylene)cyclopentyl)(phenyl)methanone (22)**

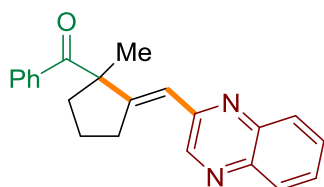

Prepared in reaction of 1-(2-methyl-1-phenylhept-1-en-6-yn-1-yl)pyrrolidine (101.4 mg, 0.400 mmol) and quinoxalin-2-yl trifluoromethanesulfonate (137.7 mg, 0.495 mmol) under general conditions (110.3 mg, 0.336 mmol, 84%). Product was isolated as oil after column chromatography on silica gel (15g, 9:1→75:25). <sup>1</sup>H NMR (400 MHz, CDCl<sub>3</sub>) δ 8.64 (s, 1H), 8.02 (ddd, *J* = 17.5, 8.2, 1.6 Hz, 2H), 7.78 – 7.62 (m, 4H), 7.45 – 7.37 (m, 1H), 7.37 – 7.29 (m, 2H), 6.44 (t, *J* = 2.6 Hz, 1H), 3.69 – 3.57 (m, 1H), 3.41 – 3.29 (m, 1H), 2.52 – 2.40 (m, 1H), 2.22 – 2.11 (m, 1H), 2.08 – 1.95 (m, 1H), 1.83 – 1.74 (m, 1H), 1.53 (s, 3H). <sup>13</sup>C NMR (101 MHz, CDCl<sub>3</sub>) δ 203.9, 162.5, 151.8, 146.4, 142.4, 140.3, 136.5, 131.6, 129.9, 129.3, 129.1, 129.1, 129.0, 128.1, 119.4, 61.3, 38.8, 34.0, 26.0, 24.8. IR (CH<sub>2</sub>Cl<sub>2</sub>): 3060, 2966, 1672, 1640, 1544, 1261, 1175, 763, 707cm<sup>-1</sup>. MS (EI): m/z (%) = 329(6), 328(26)[M<sup>+</sup>], 224(24), 223(90), 221(8), 207(13), 195(17), 181(16), 168(4), 144(10), 129(6), 106(13), 105(100), 77(50), 51(12); HRMS (EI): m/z calcd for C<sub>22</sub>H<sub>20</sub>N<sub>2</sub>O 328.1576; found 328.1569.

**(E)-(2-((1H-indol-5-yl)methylene)-1-methylcyclopentyl)(phenyl)methanone (23)**

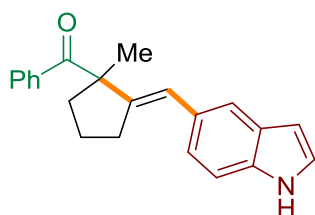

Prepared in reaction of 1-(2-methyl-1-phenylhept-1-en-6-yn-1-yl)pyrrolidine (101.1 mg, 0.399 mmol) and 1H-indol-5-yl trifluoromethanesulfonate (132.3 mg, 0.499 mmol) under general conditions (60.2 mg, 0.191 mmol, 48%). Product was isolated as oil after column chromatography on silica gel (15g, hex/AcOEt 9:1→8:2). <sup>1</sup>H NMR (400 MHz, CDCl<sub>3</sub>) δ 8.26 (s, 1H), 7.82 – 7.76 (m, 2H), 7.63 (d, *J* = 1.6 Hz, 1H), 7.46 – 7.39 (m, 1H), 7.38 – 7.30 (m, 3H), 7.19 – 7.14 (m, 2H), 6.58 – 6.52 (m, 1H), 6.35 (t, *J* = 2.6 Hz, 1H), 3.13 – 2.95 (m, 2H), 2.43 – 2.34 (m, 1H), 2.14 – 2.02 (m, 1H), 2.01 – 1.89 (m, 1H), 1.77 – 1.70 (m, 1H), 1.52 (s, 3H). <sup>13</sup>C NMR (101 MHz, CDCl<sub>3</sub>) δ 205.7, 147.2, 137.6, 134.6, 131.0, 130.0, 128.9, 128.0, 124.9, 124.7, 123.2, 120.2, 110.8, 102.7, 60.3, 38.7, 32.4, 26.0, 25.0. IR (CH<sub>2</sub>Cl<sub>2</sub>): 3409, 2963, 1665, 1467, 1265, 1176, 1008, 964, 894, 726 cm<sup>-1</sup>. MS (EI): m/z (%) = 315(2), 295(1), 265(4), 211(26), 210(100), 195(4), 182(5), 168(5), 155(2), 132(7), 117(1), 105(5), 93(2), 84(7); HRMS (ESI): m/z calcd for C<sub>22</sub>H<sub>21</sub>NONa 338.1521; found 338.1515.

**(E)-(2-(benzo[d][1,3]dioxol-5-ylmethylene)-1-methylcyclopentyl)(phenyl)methanone (24)**

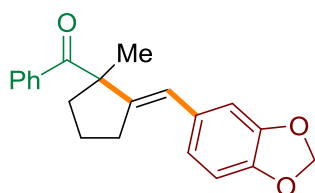

Prepared in reaction of 1-(2-methyl-1-phenylhept-1-en-6-yn-1-yl)pyrrolidine (101.3 mg, 0.400 mmol) and benzo[d][1,3]dioxol-5-yl trifluoromethanesulfonate (135.9 mg, 0.503 mmol) under general conditions (96.0 mg, 0.300 mmol, 75%). Product was isolated as oil after column chromatography on silica gel (25g, hex/AcOEt 95:5→8:2). <sup>1</sup>H NMR (400 MHz, CDCl<sub>3</sub>) δ 7.71 (d, *J* = 7.1 Hz, 2H), 7.46 – 7.38 (m, 1H), 7.34 (t, *J* = 7.6 Hz, 2H), 6.85 (d, *J* = 1.7 Hz, 1H), 6.79 – 6.71 (m, 2H), 6.10 (t, *J* = 2.7 Hz, 1H), 5.94 (s, 2H), 3.00 – 2.83 (m, 2H), 2.40 – 2.30 (m, 1H), 2.11 – 2.00 (m, 1H), 1.98 – 1.86 (m, 1H), 1.74 – 1.66 (m, 1H), 1.45 (s, 3H). <sup>13</sup>C NMR (101 MHz, CDCl<sub>3</sub>) δ 205.0, 148.6, 147.6, 146.1, 137.3, 132.3, 131.1, 128.9, 128.0, 123.6, 122.4, 108.2, 108.2, 101.0, 60.3, 38.6, 32.3, 26.0, 24.9. IR (CH<sub>2</sub>Cl<sub>2</sub>): 2964, 1670, 1503, 1489, 1444, 1257, 1039, 934, 707cm<sup>-1</sup>. MS (EI): m/z (%) = 320(4)[M<sup>+</sup>], 216(27), 215(100), 185(11), 173(1), 157(4), 143(2), 135(6), 105(5), 93(2); HRMS (ESI): m/z calcd for C<sub>21</sub>H<sub>20</sub>O<sub>3</sub>Na 343.1310; found 343.1316.



**(E)-(2-benzylidene-1-methylcyclopentyl)(p-tolyl)methanone (25)**

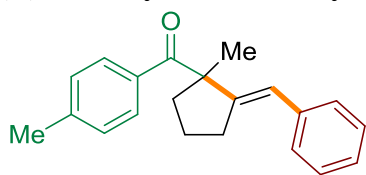

Prepared in reaction of 1-(2-methyl-1-(p-tolyl)hept-1-en-6-yn-1-yl)pyrrolidine (107.2 mg, 0.401 mmol) and phenyl trifluoromethanesulfonate (113.5 mg, 0.501 mmol) under general conditions (64.7 mg, 0.223 mmol, 55%). Product was isolated as oil after column chromatography on silica gel (25g, hex/AcOEt 98:2→95:5). <sup>1</sup>H NMR (400 MHz, CDCl<sub>3</sub>) δ 7.72 – 7.65 (m, 2H), 7.37 – 7.28 (m, 4H), 7.24 – 7.12 (m, 3H), 6.18 (t, *J* = 2.6 Hz, 1H), 3.03 – 2.94 (m, 2H), 2.45 – 2.37 (m, 1H), 2.35 (s, 3H), 2.16 – 2.04 (m, 1H), 2.03 – 1.88 (m, 1H), 1.77 – 1.68 (m, 1H), 1.47 (s, 3H). <sup>13</sup>C NMR (101 MHz, CDCl<sub>3</sub>) δ 204.3, 150.8, 141.8, 138.1, 134.1, 129.3, 128.7, 128.3, 128.2, 126.4, 123.8, 60.3, 38.8, 32.3, 26.1, 24.9, 21.4. IR (CH<sub>2</sub>Cl<sub>2</sub>): 2962, 1667, 1606, 1266, 1173, 1007, 962, 758, 694 cm<sup>-1</sup>. MS (EI): *m/z* (%) = 291(1) [M<sup>+</sup>], 290(5) [M<sup>+</sup>], 172(14), 171(65), 170(12), 155(4), 141(6), 129(21), 119(100), 115(13), 93(3), 92(7), 91(57), 89(4), 77(8), 65(15), 55(11), 41(11). HRMS (EI): *m/z* calcd for C<sub>21</sub>H<sub>22</sub>O 290.1671; found 290.1667.

**(E)-(2-(4-methoxybenzylidene)-1-methylcyclopentyl)(p-tolyl)methanone (26)**

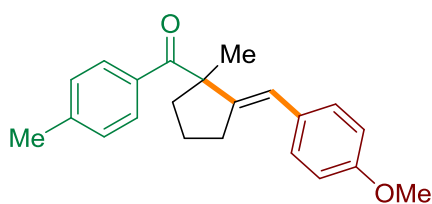

Prepared in reaction of 1-(2-methyl-1-(p-tolyl)hept-1-en-6-yn-1-yl)pyrrolidine (107.9 mg, 0.403 mmol) and 4-methoxyphenyl trifluoromethanesulfonate (128.7 mg, 0.502 mmol) under general conditions (63.4 mg, 0.198 mmol, 49%). Product was isolated as oil after column chromatography on silica gel (25g, hex/AcOEt 95:5→9:1). <sup>1</sup>H NMR (400 MHz, CDCl<sub>3</sub>) δ 7.68 – 7.62 (m, 2H), 7.25 – 7.21 (m, 2H), 7.15 – 7.11 (m, 2H), 6.90 – 6.83 (m, 2H), 6.11 (t, *J* = 2.5 Hz, 1H), 3.80 (s, 3H), 2.98 – 2.89 (m, 2H), 2.43 – 2.36 (m, 1H), 2.34 (s, 3H), 2.13 – 2.03 (m, 1H), 2.01 – 1.87 (m, 1H), 1.74 – 1.65 (m, 1H), 1.44 (s, 3H). <sup>13</sup>C NMR (101 MHz, CDCl<sub>3</sub>) δ 204.6, 158.2, 148.4, 141.7, 134.3, 130.9, 129.4, 129.3, 128.6, 123.2, 113.8, 60.3, 55.3, 38.9, 32.2, 26.1, 25.0, 21.4. IR (CH<sub>2</sub>Cl<sub>2</sub>): 2960, 1667, 1606, 1510, 1251, 1175, 1035, 825 cm<sup>-1</sup>. MS (EI): *m/z* (%) = 320(2) [M<sup>+</sup>], 203(2), 202(27), 201(100), 173(3), 160(4), 159(8), 145(5), 128(5), 121(27), 119(33), 115(6), 93(4), 91(25), 77(5), 65(9), 55(9), 41(5). HRMS (EI): *m/z* calcd for C<sub>22</sub>H<sub>24</sub>O<sub>2</sub> 320.1776; found 320.1784.

**(E)-4-((2-methyl-2-(4-methylbenzoyl)cyclopentylidene)methyl)benzonitrile (27)**

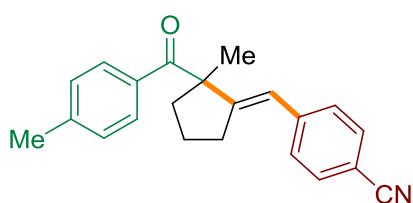

Prepared in reaction of 1-(2-methyl-1-(p-tolyl)hept-1-en-6-yn-1-yl)pyrrolidine (107.4 mg, 0.402 mmol) and 4-cyanophenyl trifluoromethanesulfonate (125.3 mg, 0.499 mmol) under general conditions (79.5 mg, 0.252 mmol, 63%). Product was isolated as oil after column chromatography on silica gel (25 g, hex/AcOEt 98:2→9:1). <sup>1</sup>H NMR (400 MHz, CDCl<sub>3</sub>) δ 7.66 – 7.55 (m, 4H), 7.35 (d, *J* = 8.3 Hz, 2H), 7.16 (d, *J* = 8.0 Hz, 2H), 6.16 (t, *J* = 2.7 Hz, 1H), 3.01 – 2.93 (m, 2H), 2.47 – 2.37 (m, 1H), 2.35 (s, 3H), 2.17 – 2.06 (m, 1H), 2.03 – 1.91 (m, 1H), 1.79 – 1.71 (m, 1H), 1.47 (s, 3H). <sup>13</sup>C NMR (101 MHz, CDCl<sub>3</sub>) δ 203.4, 155.4, 142.4, 142.1, 133.6, 132.0, 129.1, 128.7, 128.5, 122.4, 118.9, 109.5, 60.6, 38.6, 32.4, 26.0, 24.7, 21.3. IR (CH<sub>2</sub>Cl<sub>2</sub>): 2965, 2226, 1667, 1604, 1266, 1174, 553 cm<sup>-1</sup>. MS (EI): *m/z* (%) = 315(1)[M<sup>+</sup>], 196(3), 180(3), 154(3), 140(3), 127(3), 120(14), 119(100), 116(11), 91(31), 77(3), 65(10), 63(2), 39(4). HRMS (EI): *m/z* calcd for C<sub>22</sub>H<sub>21</sub>NO 315.1623; found 315.1622.

**(E)-(2-benzylidene-1-methylcyclopentyl)(4-fluorophenyl)methanone (28)**

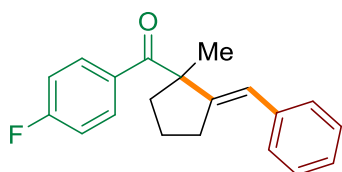

Prepared in reaction of 1-(1-(4-fluorophenyl)-2-methylhept-1-en-6-yn-1-yl)pyrrolidine (108.8 mg, 0.401 mmol) and phenyl trifluoromethanesulfonate (113.6 mg, 0.502 mmol) under general conditions (61.2 mg, 0.208 mmol, 52%). Product was isolated as oil after column chromatography on silica gel (25g, hex/AcOEt 98:2→9:1). <sup>1</sup>H NMR (400 MHz, CDCl<sub>3</sub>) δ 7.83 – 7.77 (m, 2H), 7.37 – 7.27 (m, 4H), 7.24 – 7.17 (m, 1H), 7.07 – 6.98 (m, 2H), 6.17 (t, *J* = 2.6 Hz, 1H), 3.07 – 2.88 (m, 2H),

2.40 – 2.29 (m, 1H), 2.15 – 2.05 (m, 1H), 2.03 – 1.90 (m, 1H), 1.77 – 1.68 (m, 1H), 1.47 (s, 3H). <sup>13</sup>C NMR (101 MHz, CDCl<sub>3</sub>) δ 203.1, 165.7, 163.2, 150.4, 137.8, 133.0, 133.0, 131.7, 131.6, 128.3, 128.2, 126.6, 124.1, 115.1, 114.9, 60.4, 38.8, 32.2, 26.1, 24.9. IR (CH<sub>2</sub>Cl<sub>2</sub>): 2964, 1672, 1598, 1503, 1236, 1155, 843, 694 cm<sup>-1</sup>. MS (EI): m/z (%) = 294(7) [M<sup>+</sup>], 172(23), 171(100), 155(5), 143(9), 129(32), 123(34), 115(17), 105(4), 95(23), 91(54), 77(9), 69(7), 55(10), 41(7). HRMS (EI): m/z calcd for C<sub>20</sub>H<sub>19</sub>OF 294.1420, found 294.1427.

**(E)-(4-fluorophenyl)(2-(4-methoxybenzylidene)-1-methylcyclopentyl)methanone (29)**

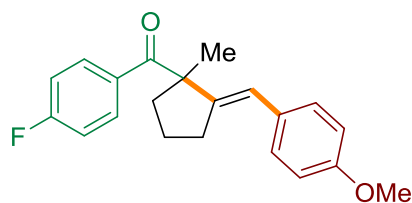

Prepared in reaction of 1-(1-(4-fluorophenyl)-2-methylhept-1-en-6-yn-1-yl)pyrrolidine (108.3 mg, 0.399 mmol) and 4-methoxyphenyl trifluoromethanesulfonate (under general conditions (60.9 mg, 0.188 mmol, 47%). Product was isolated as oil after column chromatography on silica gel (25g, hex/AcOEt 95:5→8:2). <sup>1</sup>H NMR (400 MHz, CDCl<sub>3</sub>) δ 7.81 – 7.75 (m, 2H), 7.27 – 7.18 (m, 2H), 7.05 – 6.97 (m, 2H), 6.91 – 6.84 (m, 2H),

6.10 (t, *J* = 2.6 Hz, 1H), 3.80 (s, 3H), 3.04 – 2.84 (m, 2H), 2.38 – 2.27 (m, 1H), 2.13 – 2.03 (m, 1H), 2.02 – 1.89 (m, 1H), 1.75 – 1.66 (m, 1H), 1.45 (s, 3H). <sup>13</sup>C NMR (101 MHz, CDCl<sub>3</sub>) δ 203.3, 165.7, 163.1, 158.3, 148.0, 133.1, 131.7, 131.6, 130.7, 129.5, 123.5, 122.3, 115.1, 115.0, 114.9, 113.8, 60.3, 55.3, 38.8, 32.1, 26.0, 24.9. IR (CH<sub>2</sub>Cl<sub>2</sub>): 2961, 1671, 1598, 1510, 1251, 1035, 843, 611 cm<sup>-1</sup>. MS (EI): m/z (%) = 324(1)[M<sup>+</sup>], 202(23), 201(100), 173(3), 160(4), 159(10), 123(12), 121(28), 115(6), 103(1), 95(12), 91(6), 77(5), 55(3), 41(2). HRMS (EI): m/z calcd for C<sub>21</sub>H<sub>21</sub>O<sub>2</sub>F 324.1526; found 324.1524.

**(E)-4-((2-(4-fluorobenzoyl)-2-methylcyclopentylidene)methyl)benzotrile (30)**

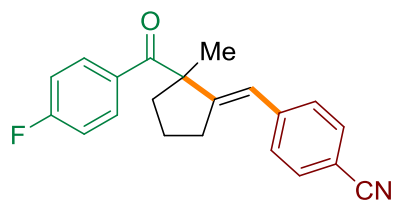

Prepared in reaction of 1-(1-(4-fluorophenyl)-2-methylhept-1-en-6-yn-1-yl)pyrrolidine (108.1 mg, 0.398 mmol) and 4-cyanophenyl trifluoromethanesulfonate (125.2 mg, 0.499 mmol) under general conditions (86.8 mg, 0.272 mmol, 68%). Product was isolated as oil after column chromatography on silica gel (25g, hex/AcOEt 98:2→9:1). <sup>1</sup>H NMR (400 MHz, CDCl<sub>3</sub>) δ 7.78 – 7.72 (m, 2H), 7.62 – 7.55 (m, 2H), 7.38 – 7.32 (m, 2H), 7.07 – 6.99 (m, 2H),

6.15 (t, *J* = 2.6 Hz, 1H), 3.01 – 2.93 (m, 2H), 2.44 – 2.32 (m, 1H), 2.18 – 2.07 (m, 1H), 2.05 – 1.93 (m, 1H), 1.80 – 1.72 (m, 1H), 1.46 (s, 3H). <sup>13</sup>C NMR (101 MHz, CDCl<sub>3</sub>) δ 202.2, 165.8, 163.3, 155.0, 142.2, 132.5, 132.4, 132.1, 131.6, 131.5, 128.6, 122.7, 118.9, 115.3, 115.0, 109.8, 60.7, 38.6, 32.4, 26.0, 24.7. IR (CH<sub>2</sub>Cl<sub>2</sub>): 2966, 2225, 1672, 1599, 1503, 1236, 1156, 845, 553 cm<sup>-1</sup>. MS (EI): m/z (%) = 319(2)[M<sup>+</sup>], 197(4), 196(26), 180(3), 166(33), 154(9), 140(6), 124(14), 123(100), 116(24), 95(27), 77(4), 75(7), 69(5), 41(5). HRMS (EI): m/z calcd for C<sub>21</sub>H<sub>18</sub>NOF 319.1372; found 319.1385.

**(E)-(2-benzylidene-1-methylcyclopentyl)(4-methoxyphenyl)methanone (31)**

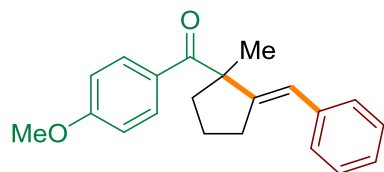

Prepared in reaction of 1-(1-(4-methoxyphenyl)-2-methylhept-1-en-6-yn-1-yl)pyrrolidine and phenyl trifluoromethanesulfonate (113.5 mg, 0.500 mmol) under general conditions (83.7 mg, 0.273 mmol, 68%). Product was isolated as oil after column chromatography on silica gel (25g, hex/AcOEt 9:1). <sup>1</sup>H NMR (400 MHz, CDCl<sub>3</sub>) δ 7.84 – 7.77 (m, 2H), 7.35 – 7.27 (m, 4H), 7.22 – 7.16 (m, 1H), 6.87 –

6.81 (m, 2H), 6.15 (t, *J* = 2.6 Hz, 1H), 3.81 (s, 3H), 3.04 – 2.96 (m, 2H), 2.47 – 2.36 (m, 1H), 2.16 – 2.08 (m, 1H), 1.72 (ddd, *J* = 12.7, 7.2, 2.6 Hz, 1H), 1.46 (s, 3H). <sup>13</sup>C NMR (101 MHz, CDCl<sub>3</sub>) δ 202.9, 162.1, 151.1, 138.1, 131.6, 129.0, 128.3, 128.2, 126.4, 123.7, 113.2, 60.2, 55.3, 39.1, 32.2, 26.2, 24.9. IR (CH<sub>2</sub>Cl<sub>2</sub>): 2964, 1660, 1600, 1508, 1256, 1167, 1032, 839, 695 cm<sup>-1</sup>. MS (EI): m/z (%) = 306(1), 252(1), 185(1), 171(13), 152(7), 136(17), 135(100), 129(7), 107(5), 92(9), 91(15), 77(5), 64(3), 55(3). HRMS (EI): m/z calcd for C<sub>21</sub>H<sub>22</sub>O<sub>2</sub> 306.1620; found 306.1608.

**(E)-(2-(4-methoxybenzylidene)-1-methylcyclopentyl)(4-methoxyphenyl)methanone (32)**

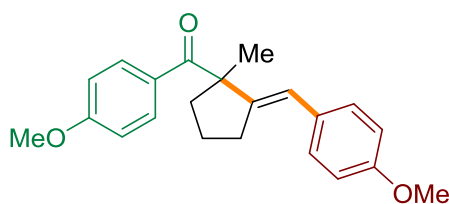

Prepared in reaction of 1-(1-(4-methoxyphenyl)-2-methylhept-1-en-6-yn-1-yl)pyrrolidine and 4-methoxyphenyl trifluoromethanesulfonate (128.5 mg, 0.502 mmol) under general conditions (72.2 mg, 0.216 mmol, 54%). Product was isolated as oil after column chromatography on silica gel (25g, hex/AcOEt 9:1→8:2). <sup>1</sup>H NMR (400 MHz, CDCl<sub>3</sub>) δ 7.83 – 7.75 (m, 2H), 7.26 – 7.19 (m, 3H), 6.91 – 6.80 (m, 4H), 6.09 (t, *J* = 2.6 Hz, 1H), 3.80 (d, *J* = 4.3 Hz, 6H), 3.02 – 2.88 (m, 2H), 2.45 – 2.32 (m, 1H), 2.16 – 2.06 (m, 1H), 2.03 – 1.87 (m, 1H), 1.75 – 1.64 (m, 1H), 1.44 (s, 3H). <sup>13</sup>C NMR (101 MHz, CDCl<sub>3</sub>) δ 203.1, 162.0, 158.1, 148.7, 131.5, 130.9, 129.4, 129.1, 123.1, 113.7, 113.1, 60.1, 55.3, 55.3, 39.1, 32.1, 26.2, 24.9. IR (CH<sub>2</sub>Cl<sub>2</sub>): 2960, 1660, 1601, 1510, 1253, 1167, 1034, 835 cm<sup>-1</sup>. MS (EI): *m/z* (%) = 336(7)[M<sup>+</sup>], 307(3), 202(28), 201(100), 200(9), 160(4), 159(8), 136(9), 135(57), 121(28), 115(7), 92(10), 77(16), 55(5), 41(4). HRMS (EI): *m/z* calcd for C<sub>22</sub>H<sub>24</sub>O<sub>3</sub> 336.1725; found 336.1719.

**(E)-(2-benzylidene-1-methoxycyclopentyl)(phenyl)methanone (33)**

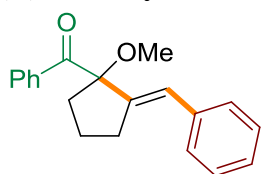

Prepared in reaction of 1-(2-methoxy-1-phenylhept-1-en-6-yn-1-yl)pyrrolidine (107.8 mg, 0.400 mmol) and phenyl trifluoromethanesulfonate (87.1 mg, 0.298 mmol, 75%). Product was isolated as oil after column chromatography on silica gel (15g, hex/AcOEt 9:1). <sup>1</sup>H NMR (400 MHz, CDCl<sub>3</sub>) δ 8.18 – 8.12 (m, 2H), 7.54 – 7.48 (m, 1H), 7.46 – 7.39 (m, 2H), 7.33 (d, *J* = 5.0 Hz, 4H), 7.26 – 7.20 (m, 1H), 6.59 (t, *J* = 2.6 Hz, 1H), 3.36 (s, 3H), 2.91 – 2.80 (m, 1H), 2.79 – 2.67 (m, 1H), 2.46 (dt, *J* = 12.8, 7.3 Hz, 1H), 2.15 – 2.06 (m, 1H), 2.03 – 1.94 (m, 2H). <sup>13</sup>C NMR (101 MHz, CDCl<sub>3</sub>) δ 201.2, 143.4, 137.2, 136.2, 132.3, 129.7, 128.8, 128.2, 128.1, 127.3, 126.9, 94.8, 52.6, 34.5, 29.9, 22.8. IR (CH<sub>2</sub>Cl<sub>2</sub>): 2953, 1676, 1596, 1447, 1239, 1174, 1078, 694 cm<sup>-1</sup>. MS (EI): *m/z* (%) = 292(3)[M<sup>+</sup>], 260(1), 217(1), 189(2), 188(22), 187(100), 172(3), 171(9), 155(8), 143(3), 130(4), 129(12), 115(20), 105(24), 91(29), 77(28), 65(3), 55(6), 51(11), 41(5). HRMS (EI): *m/z* calcd for C<sub>20</sub>H<sub>20</sub>O<sub>2</sub> 292.1463; found 292.1458.

**(E)-(1-methoxy-2-(4-methoxybenzylidene)cyclopentyl)(phenyl)methanone (34)**

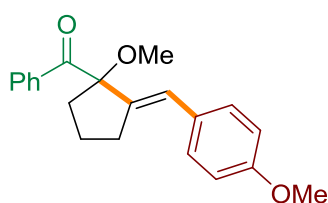

Prepared in reaction of 1-(2-methoxy-1-phenylhept-1-en-6-yn-1-yl)pyrrolidine (108.0 mg, 0.401 mmol) and 4-methoxyphenyl trifluoromethanesulfonate (128.3 mg, 0.501 mmol) under general conditions (88.3 mg, 0.273 mmol, 68%). Product was isolated as oil after column chromatography on silica gel (15g, hex/AcOEt 8:2). <sup>1</sup>H NMR (400 MHz, CDCl<sub>3</sub>) δ 8.16 – 8.09 (m, 2H), 7.54 – 7.46 (m, 1H), 7.43 – 7.37 (m, 2H), 7.30 – 7.23 (m, 2H), 6.89 – 6.83 (m, 2H), 6.50 (t, *J* = 2.6 Hz, 1H), 3.79 (s, 3H), 3.33 (s, 3H), 2.88 – 2.77 (m, 1H), 2.76 – 2.64 (m, 1H), 2.43 (dt, *J* = 12.8, 7.3 Hz, 1H), 2.13 – 2.03 (m, 1H), 2.03 – 1.93 (m, 2H). <sup>13</sup>C NMR (101 MHz, CDCl<sub>3</sub>) δ 201.4, 158.6, 141.1, 136.3, 132.2, 130.1, 130.0, 129.7, 128.1, 127.0, 113.7, 94.9, 55.2, 52.6, 34.7, 30.0, 22.9. IR (CH<sub>2</sub>Cl<sub>2</sub>): 2955, 1676, 1606, 1512, 1251, 1177, 1034, 706 cm<sup>-1</sup>. MS (EI): *m/z* (%) = 322(2)[M<sup>+</sup>], 291(7), 256(1), 219(4), 218(25), 217(100), 201(8), 185(5), 159(7), 146(8), 131(5), 123(12), 121(21), 105(26), 103(7), 91(5), 77(26), 69(2), 57(6), 51(10). HRMS (EI): *m/z* calcd for C<sub>21</sub>H<sub>22</sub>O<sub>3</sub> 322.1569; found 322.1560.

**(E)-4-((2-benzoyl-2-methoxycyclopentylidene)methyl)benzonitrile (35)**

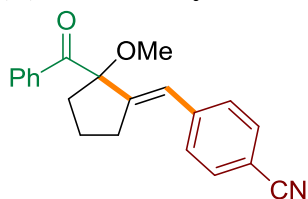

Prepared in reaction of 1-(2-methoxy-1-phenylhept-1-en-6-yn-1-yl)pyrrolidine (107.8 mg, 0.400 mmol) and 4-cyanophenyl trifluoromethanesulfonate (125.7 mg, 0.500 mmol) under general conditions (77.1 mg, 0.243 mmol, 91%). Product was isolated as oil after column chromatography on silica gel (15g, hex/AcOEt 9:1→8:2). <sup>1</sup>H NMR (400 MHz, CDCl<sub>3</sub>) δ 8.17 – 8.10 (m, 2H), 7.60 – 7.55 (m, 2H), 7.54 – 7.48 (m, 1H), 7.45 – 7.34 (m, 4H), 6.58 (t, *J* = 2.7 Hz, 1H), 3.32 (s, 3H), 2.84 – 2.63 (m, 2H), 2.48 – 2.40 (m, 1H), 2.15 – 2.05 (m, 1H), 2.03 – 1.92 (m, 2H). <sup>13</sup>C NMR (101

MHz, CDCl<sub>3</sub>)  $\delta$  200.5, 147.6, 141.7, 135.7, 132.5, 131.9, 129.7, 129.1, 128.1, 125.3, 118.8, 110.1, 94.8, 52.6, 33.9, 30.0, 22.5. IR (CH<sub>2</sub>Cl<sub>2</sub>): 2955, 2226, 1680, 1603, 1177, 887, 706, 555 cm<sup>-1</sup>. MS (EI):  $m/z$  (%) = 317(1)[M<sup>+</sup>], 286(1), 228(1), 213(27), 212(100), 196(3), 180(5), 155(3), 154(9), 140(11), 127(6), 116(16), 105(21), 96(2), 77(21), 51(7), 41(4). HRMS (EI):  $m/z$  calcd for C<sub>21</sub>H<sub>19</sub>NO<sub>2</sub> 317.1416; found 317.1427.

**(E)-(2-benzylidene-1-phenylcyclopentyl)(phenyl)methanone (36)**

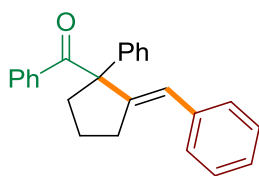

Prepared in reaction of 1-(1,2-diphenylhept-1-en-6-yn-1-yl)pyrrolidine (126.5 mg, 0.401 mmol) and phenyl trifluoromethanesulfonate (113.7 mg, 0.500 mmol) under general conditions (63 mg, 0.186 mmol, 47%). Product was isolated as yellow oil after column chromatography on silica gel (15g, hex/AcOEt 98:2→95:5). <sup>1</sup>H NMR (500 MHz, CDCl<sub>3</sub>)  $\delta$  7.58 – 7.51 (m, 2H), 7.36 – 7.27 (m, 3H), 7.26 – 7.17 (m, 9H), 7.14 – 7.09 (m, 1H), 6.07 (t,  $J$  = 2.6 Hz, 1H), 2.77 (td,  $J$  = 7.4, 2.5 Hz, 2H), 2.67 (dt,  $J$  = 13.2, 6.8 Hz, 1H), 2.25 (dt,  $J$  = 12.7, 7.0 Hz, 1H), 1.76 – 1.65 (m, 2H). <sup>13</sup>C NMR (126 MHz, CDCl<sub>3</sub>)  $\delta$  202.0, 146.8, 142.9, 137.9, 137.1, 131.6, 130.0, 128.6, 128.6, 128.1, 127.9, 127.8, 127.8, 126.9, 126.5, 39.2, 31.6, 23.5. IR (CH<sub>2</sub>Cl<sub>2</sub>): 2957, 2926, 1674, 1596, 1446, 1225, 757, 699 cm<sup>-1</sup>. HRMS (ESI):  $m/z$  calcd for C<sub>26</sub>H<sub>24</sub>O<sub>2</sub>Na 361.1568; found 361.1566.

**(E)-(2-(4-methoxybenzylidene)-1-phenylcyclopentyl)(phenyl)methanone (37)**

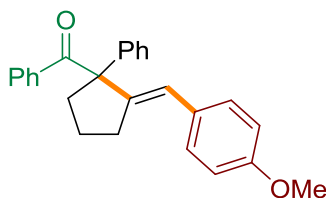

Prepared in reaction of 1-(1,2-diphenylhept-1-en-6-yn-1-yl)pyrrolidine (126.4 mg, 0.400 mmol) and 4-methoxyphenyl trifluoromethanesulfonate (128.3 mg, 0.501 mmol) under general conditions (110 mg, 0.299 mmol, 75%). Product was isolated as yellow oil after column chromatography on silica gel (15g, hex/AcOEt 98:2→85:15). <sup>1</sup>H NMR (500 MHz, CDCl<sub>3</sub>)  $\delta$  7.66 – 7.61 (m, 2H), 7.43 – 7.31 (m, 5H), 7.32 – 7.25 (m, 3H), 7.25 – 7.20 (m, 2H), 6.89 – 6.84 (m, 2H), 6.11 (t,  $J$  = 2.5 Hz, 1H), 3.80 (s, 3H), 2.83 (td,  $J$  = 7.4, 2.5 Hz, 2H), 2.75 (dt,  $J$  = 12.7, 6.9 Hz, 1H), 2.31 (dt,  $J$  = 12.6, 6.9 Hz, 1H), 1.86 – 1.73 (m, 2H). <sup>13</sup>C NMR (126 MHz, CDCl<sub>3</sub>)  $\delta$  202.2, 158.2, 144.5, 143.0, 137.2, 131.5, 130.7, 129.9, 129.8, 128.5, 127.9, 127.8, 127.2, 126.8, 113.6, 69.9, 55.2, 39.3, 31.5, 23.5. IR (CH<sub>2</sub>Cl<sub>2</sub>): 2956, 1673, 1605, 1510, 1251, 1177, 1034, 702 cm<sup>-1</sup>. HRMS (ESI):  $m/z$  calcd for C<sub>26</sub>H<sub>24</sub>O<sub>2</sub>Na 391.1674; found 391.1675.

**(E)-(2-benzylidene-1-ethylcyclopentyl)(phenyl)methanone (38)**

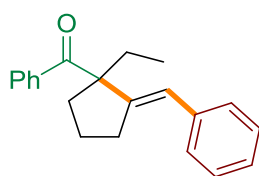

Prepared in reaction of 1-(2-ethyl-1-phenylhept-1-en-6-yn-1-yl)pyrrolidine (107.2 mg, 0.401 mmol) and phenyl trifluoromethanesulfonate (113.1 mg, 0.500 mmol) under general conditions (72 mg, 0.248 mmol, 62%). Product was isolated as oil after column chromatography on silica gel (25g, hex/AcOEt 95:5→9:1). <sup>1</sup>H NMR (400 MHz, CDCl<sub>3</sub>)  $\delta$  7.66 – 7.59 (m, 2H), 7.44 – 7.38 (m, 1H), 7.38 – 7.29 (m, 6H), 7.25 – 7.19 (m, 1H), 6.25 (t,  $J$  = 2.6 Hz, 1H), 2.90 (td,  $J$  = 7.5, 2.5 Hz, 2H), 2.36 – 2.25 (m, 1H), 2.17 – 2.06 (m, 1H), 2.01 – 1.72 (m, 4H), 0.98 (t,  $J$  = 7.3 Hz, 3H). <sup>13</sup>C NMR (101 MHz, CDCl<sub>3</sub>)  $\delta$  205.3, 148.7, 138.8, 138.0, 130.7, 128.4, 128.3, 128.2, 127.9, 126.5, 124.5, 64.5, 34.3, 32.1, 31.0, 24.5, 9.7. IR (CH<sub>2</sub>Cl<sub>2</sub>): 2963, 1672, 1597, 1445, 1256, 1173, 517 cm<sup>-1</sup>. MS (EI):  $m/z$  (%) = 290(6)[M<sup>+</sup>], 186(25), 185(100), 184(7), 155(6), 143(19), 129(32), 128(14), 115(15), 91(52), 77(37), 51(11). HRMS (ESI):  $m/z$  calcd for C<sub>21</sub>H<sub>22</sub>O 290.1671; found 290.1680.

**(E)-(1-ethyl-2-(4-methoxybenzylidene)cyclopentyl)(phenyl)methanone (39)**

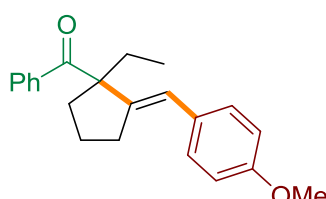

Prepared in reaction of 1-(2-ethyl-1-phenylhept-1-en-6-yn-1-yl)pyrrolidine (107.9 mg, 0.403 mmol) and 4-methoxyphenyl trifluoromethanesulfonate (128.5 mg, 0.502 mmol) under general conditions (77.9 mg, 0.243 mmol, 61%). Product was isolated as oil after column chromatography on silica gel (15g, hex/AcOEt 8:2). <sup>1</sup>H NMR (400 MHz, CDCl<sub>3</sub>)  $\delta$  7.64 – 7.58 (m, 3H), 7.42 – 7.36 (m, 1H), 7.34 – 7.29 (m, 2H), 7.28 – 7.23 (m, 2H), 6.93 – 6.85 (m, 2H), 6.18 (t,  $J$



= 2.6 Hz, 1H), 3.81 (s, 3H), 2.93 – 2.81 (m, 2H), 2.34 – 2.23 (m, 1H), 2.15 – 2.05 (m, 1H), 1.99 – 1.81 (m, 3H), 1.81 – 1.69 (m, 1H), 0.96 (t,  $J = 7.3$  Hz, 3H).  $^{13}\text{C}$  NMR (101 MHz,  $\text{CDCl}_3$ )  $\delta$  205.5, 158.2, 146.4, 138.9, 130.8, 130.6, 129.6, 128.2, 127.8, 123.9, 113.7, 64.4, 55.2, 34.3, 32.0, 30.9, 24.5, 9.7. IR ( $\text{CH}_2\text{Cl}_2$ ): 2961, 1670, 1605, 1510, 1250, 1176, 1032, 826, 705  $\text{cm}^{-1}$ . MS (EI):  $m/z$  (%) = 320(1)[ $\text{M}^+$ ], 216(22), 215(100), 185(2), 173(5), 159(9), 141(3), 123(5), 121(27), 105(14), 91(6), 77(20), 69(8), 51(5). HRMS (ESI):  $m/z$  calcd for 320.1776; found 320.1772.

**(E)-4-((2-benzoyl-2-ethylcyclopentylidene)methyl)benzonitrile (40)**

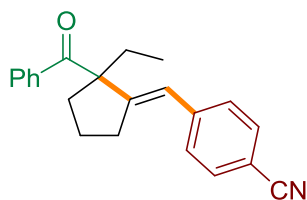

Prepared in reaction of 1-(2-ethyl-1-phenylhept-1-en-6-yn-1-yl)pyrrolidine (106.7 mg, 0.399 mmol) and 4-cyanophenyl trifluoromethanesulfonate (125.8 mg, 0.500 mmol) under general conditions (103.4 mg, 0.328 mmol, 82%). Product was isolated after column chromatography on silica gel (25g, hex/AcOEt 95:5→9:1).  $^1\text{H}$  NMR (400 MHz,  $\text{CDCl}_3$ )  $\delta$  7.58 (t,  $J = 7.6$  Hz, 4H), 7.46 – 7.30 (m, 6H), 6.21 (t,  $J = 2.6$  Hz, 1H), 2.91 – 2.83 (m, 2H), 2.38 – 2.27 (m, 1H), 2.16 – 2.04 (m, 1H), 2.01 – 1.84 (m, 3H), 1.82 – 1.70 (m, 1H), 0.96 (t,  $J = 7.3$  Hz, 3H).  $^{13}\text{C}$  NMR (101 MHz,  $\text{CDCl}_3$ )  $\delta$  204.5, 153.2, 142.3, 138.2, 132.0, 130.9, 128.7, 128.0, 128.0, 123.1, 118.9, 109.6, 64.9, 34.2, 32.3, 31.0, 24.4, 9.7. IR ( $\text{CH}_2\text{Cl}_2$ ): 2965, 2226, 1671, 1603, 1256, 1175, 704, 555  $\text{cm}^{-1}$ . MS (EI):  $m/z$  (%) = 315(1)[ $\text{M}^+$ ], 286(1), 210(11), 180(3), 168(6), 154(7), 140(6), 127(4), 116(14), 105(100), 78(4), 77(34), 55(3), 51(8), 41(5). HRMS (EI):  $m/z$  calcd for  $\text{C}_{22}\text{H}_{21}\text{NO}$  315.1623; found 315.1625.

**(E)-1-(1-isopropyl-2-(4-methoxybenzylidene)cyclopentyl)(phenyl)methanone (41)**

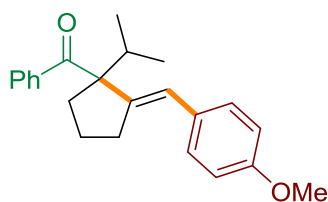

Prepared in reaction of 1-(2-isopropyl-1-phenylhept-1-en-6-yn-1-yl)pyrrolidine (112.6 mg, 0.400 mmol) and 4-methoxyphenyl trifluoromethanesulfonate (60.2 mg, 0.180 mmol, 45%). Product was isolated as oil after column chromatography on silica gel (15g, hex/AcOEt 9:1).  $^1\text{H}$  NMR (400 MHz,  $\text{CDCl}_3$ )  $\delta$  7.39 – 7.31 (m, 3H), 7.32 – 7.21 (m, 4H), 6.92 – 6.85 (m, 2H), 6.24 (t,  $J = 2.5$  Hz, 1H), 3.82 (s, 3H), 2.91 – 2.78 (m, 1H), 2.74 (p,  $J = 6.7$  Hz, 1H), 2.69 – 2.56 (m, 1H), 2.11 – 2.01 (m, 1H), 1.90 – 1.77 (m, 2H), 1.67 – 1.52 (m, 1H), 0.97 (d,  $J = 6.5$  Hz, 3H), 0.89 (d,  $J = 6.9$  Hz, 3H).  $^{13}\text{C}$  NMR (101 MHz,  $\text{CDCl}_3$ )  $\delta$  207.2, 158.3, 145.3, 141.2, 130.9, 129.8, 129.6, 127.7, 126.9, 124.5, 113.8, 68.2, 55.3, 34.6, 32.8, 28.7, 24.9, 19.4, 17.3. IR ( $\text{CH}_2\text{Cl}_2$ ): 2959, 1677, 1606, 1510, 1251, 1177, 1035, 827, 701  $\text{cm}^{-1}$ . MS (EI):  $m/z$  (%) = 334(1)[ $\text{M}^+$ ], 291(2), 230(30), 229(100), 214(2), 199(3), 187(6), 173(17), 159(10), 147(6), 135(10), 128(3), 121(34), 115(5), 95(4), 69(9), 55(3), 41(3). HRMS (EI):  $m/z$  calcd for  $\text{C}_{23}\text{H}_{26}\text{O}_2$  334.1933; found 334.1937.

**(E)-1-(2-benzylidene-1-methylcyclopentyl)propan-1-one (42)**

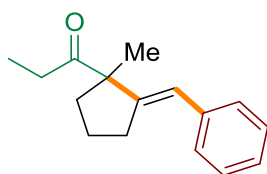

Prepared in a reaction of 1-(4-methylnon-3-en-8-yn-3-yl)pyrrolidine (0.400 mmol, 82.93 mg) and phenyl trifluoromethanesulfonate (107.1 mg, 0.399 mmol) under general conditions (34.7 mg, 0.152 mmol, 38%). Product was isolated as oil after column chromatography on silica gel (15g, hex/AcOEt 9:1).  $^1\text{H}$  NMR (400 MHz,  $\text{CDCl}_3$ )  $\delta$  7.37 – 7.28 (m, 4H), 7.23 – 7.18 (m, 1H), 6.16 (t,  $J = 2.6$  Hz, 1H), 2.87 – 2.76 (m, 1H), 2.76 – 2.65 (m, 1H), 2.62 – 2.53 (m, 1H), 2.51 – 2.40 (m, 1H), 2.29 – 2.19 (m, 1H), 1.98 – 1.86 (m, 1H), 1.86 – 1.75 (m, 1H), 1.62 – 1.53 (m, 1H), 1.34 (s, 3H), 1.04 (t,  $J = 7.3$  Hz, 3H).  $^{13}\text{C}$  NMR (101 MHz,  $\text{CDCl}_3$ )  $\delta$  213.3, 149.7, 128.3, 128.3, 126.5, 123.3, 96.8, 60.9, 37.2, 32.3, 30.9, 24.5, 23.9, 8.9. IR ( $\text{CH}_2\text{Cl}_2$ ): 2972, 2937, 1711, 1599, 1490, 1459, 1377, 758, 692  $\text{cm}^{-1}$ . HRMS (APCI):  $m/z$  calcd for  $\text{C}_{16}\text{H}_{21}\text{O}$  229.1592; found 229.1593.

**(2-benzylcyclopent-1-en-1-yl)(phenyl)methanone**

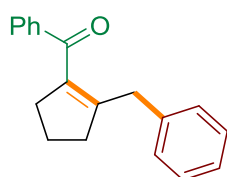

Prepared in reaction of 1-(1-phenylhept-1-en-6-yn-1-yl)pyrrolidine (95.8 mg, 0.401 mmol) and phenyl trifluoromethanesulfonate (113.09 mg, 0.500 mmol) under general conditions (38.8 mg, 0.148 mmol, 37%). Product was isolated as oil after column chromatography on silica gel (15g, hex/AcOEt 98:2→95:5).  $^1\text{H}$  NMR (400 MHz,  $\text{CDCl}_3$ )  $\delta$  7.86 – 7.81 (m, 2H), 7.57 – 7.52 (m, 1H), 7.48 –

7.42 (m, 2H), 7.25 – 7.22 (m, 2H), 7.20 – 7.14 (m, 1H), 7.13 – 7.08 (m, 2H), 3.46 (s, 2H), 2.77 (ddt,  $J = 7.8, 5.9, 1.9$  Hz, 2H), 2.43 (dddd,  $J = 7.8, 5.8, 2.2, 1.1$  Hz, 2H), 1.96 – 1.85 (m, 2H).  $^{13}\text{C}$  NMR (101 MHz,  $\text{CDCl}_3$ )  $\delta$  197.3, 150.5, 138.8, 138.7, 137.3, 132.6, 128.9, 128.8, 128.5, 128.4, 126.2, 37.1, 36.4, 36.2, 22.4. IR ( $\text{CH}_2\text{Cl}_2$ ): 2962, 1670, 1445, 1596, 1263, 1175, 963, 816, 706  $\text{cm}^{-1}$ . HRMS (ESI):  $m/z$  calcd for  $\text{C}_{19}\text{H}_{18}\text{ONa}$  285.1255; found 285.1255.

## Kinetic profiles for the reaction of various enamines with phenyl triflate.

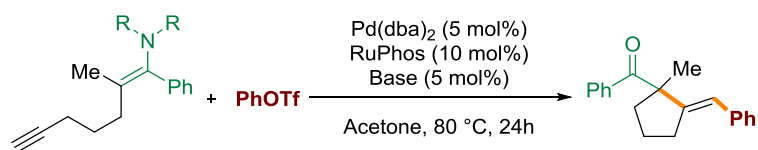

| Entry | Time | Concentration of product [mol/L] |            |           |       |
|-------|------|----------------------------------|------------|-----------|-------|
|       |      | Pyrrolidine                      | Piperidine | Morfoline | Et2NH |
| 1     | 1 h  | 0.012                            | 0.006      | 0.004     | 0.002 |
| 2     | 2 h  | 0.028                            | 0.009      | 0.007     | 0.004 |
| 3     | 3 h  | 0.036                            | 0.013      | 0.010     | 0.006 |
| 4     | 4 h  | 0.040                            | 0.018      | 0.014     | 0.009 |
| 5     | 6 h  | 0.05                             | 0.024      | 0.021     | 0.011 |
| 6     | 8 h  | 0.059                            | 0.033      | 0.029     | 0.016 |
| 7     | 12 h | 0.070                            | 0.051      | 0.039     | 0.023 |
| 8     | 24 h | 0.086                            | 0.074      | 0.056     | 0.034 |

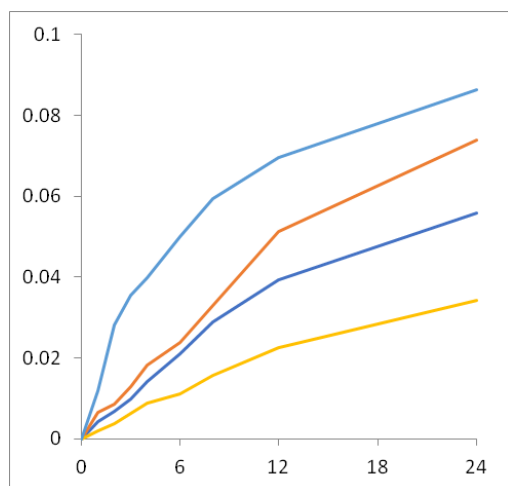

[product] vs time

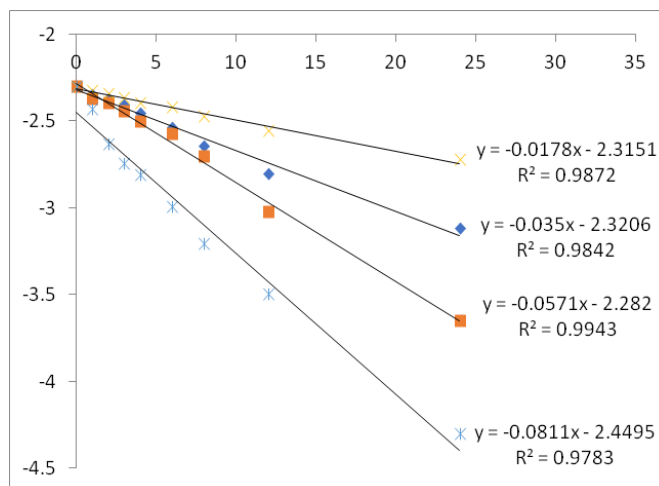

$\log(0.1 - [\text{product}])$  vs time

### Kinetic profiles for the reaction of 3 with electronically varied aryl triflates.

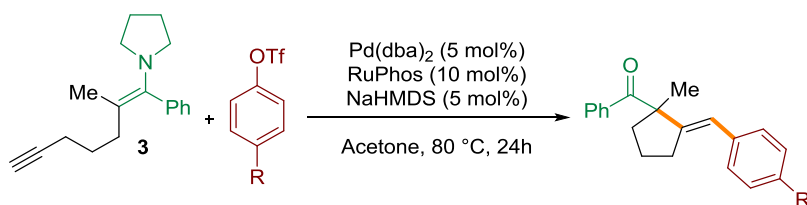

| Entry | Time | Concentration of product [mol/L] |       |        |
|-------|------|----------------------------------|-------|--------|
|       |      | R= CN                            | R= H  | R= OMe |
| 1     | 1 h  | 0.026                            | 0.018 | 0.002  |
| 2     | 2 h  | 0.039                            | 0.028 | 0.006  |
| 3     | 4 h  | 0.056                            | 0.040 | 0.016  |
| 4     | 12 h | 0.075                            | 0.066 | 0.041  |
| 5     | 24 h | 0.098                            | 0.086 | 0.080  |

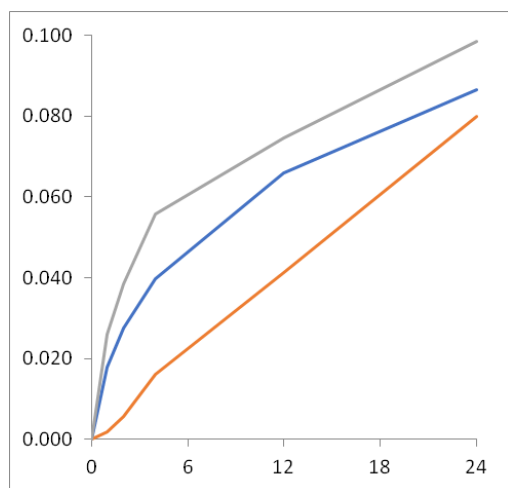

[product] vs time

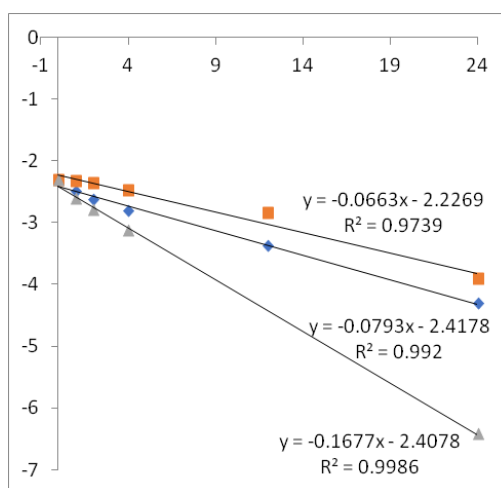

log(0.1-[product]) vs time

# Structure elucidation of compound 4

## 1D <sup>1</sup>H and <sup>13</sup>C NMR Spectra

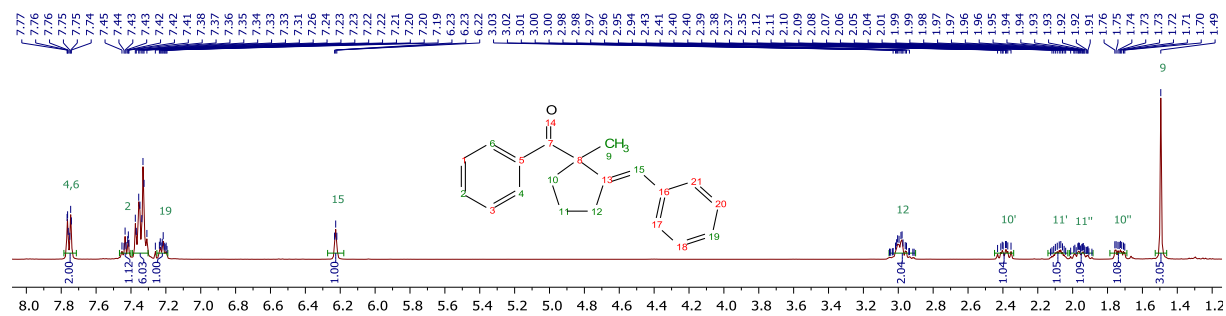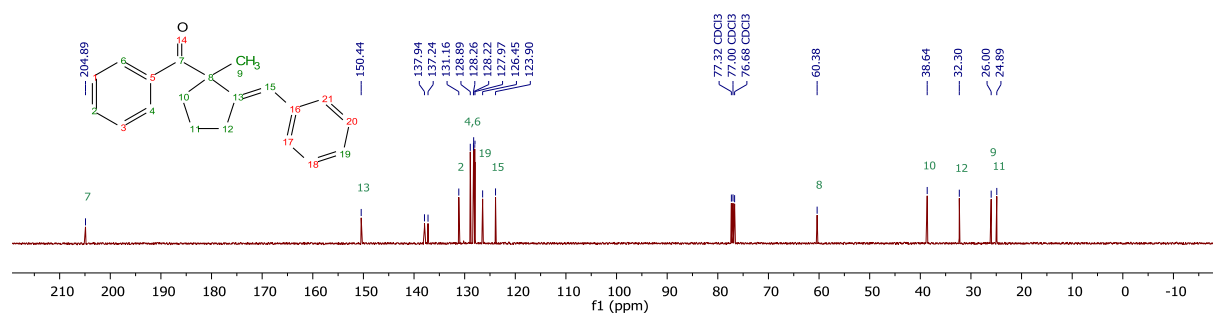

## 1D <sup>1</sup>H NOESY

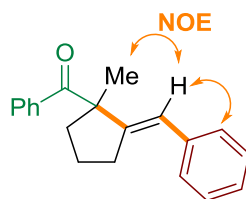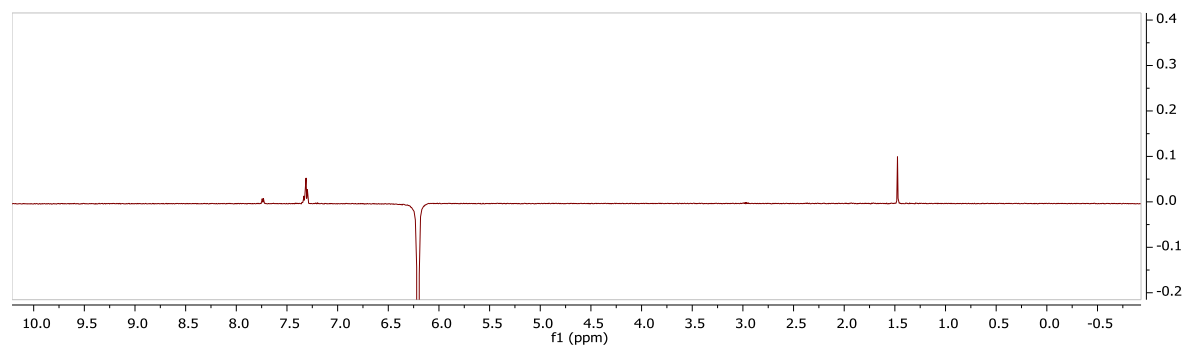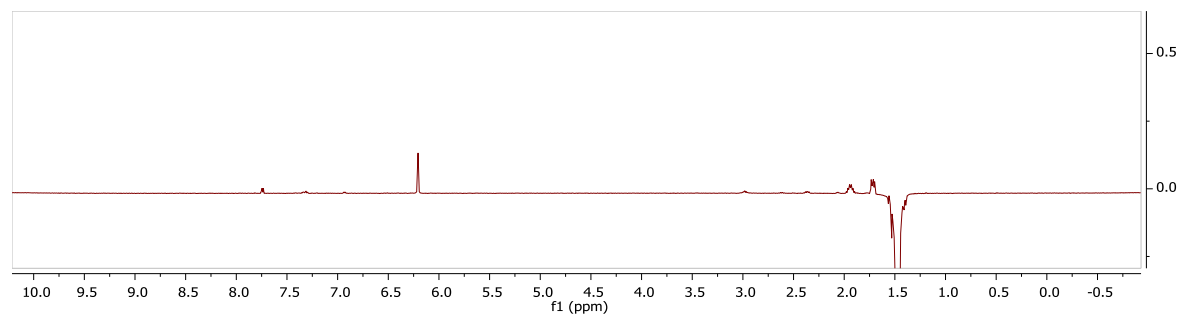

# HSQC

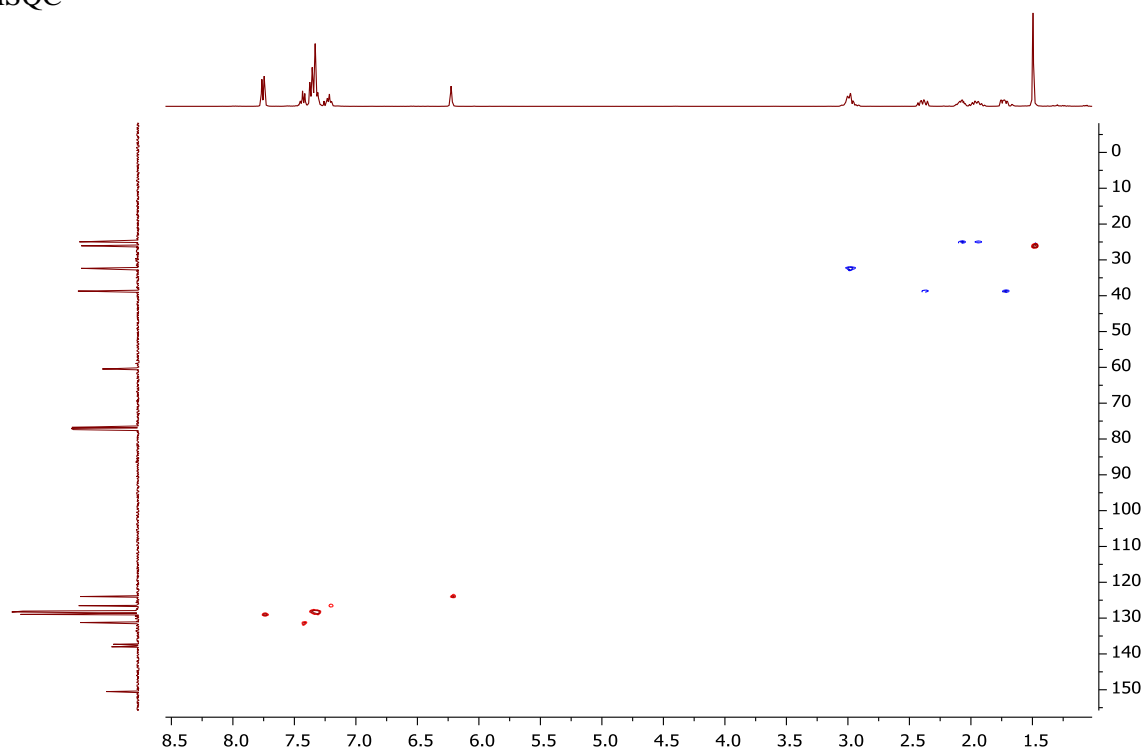

# HMBC

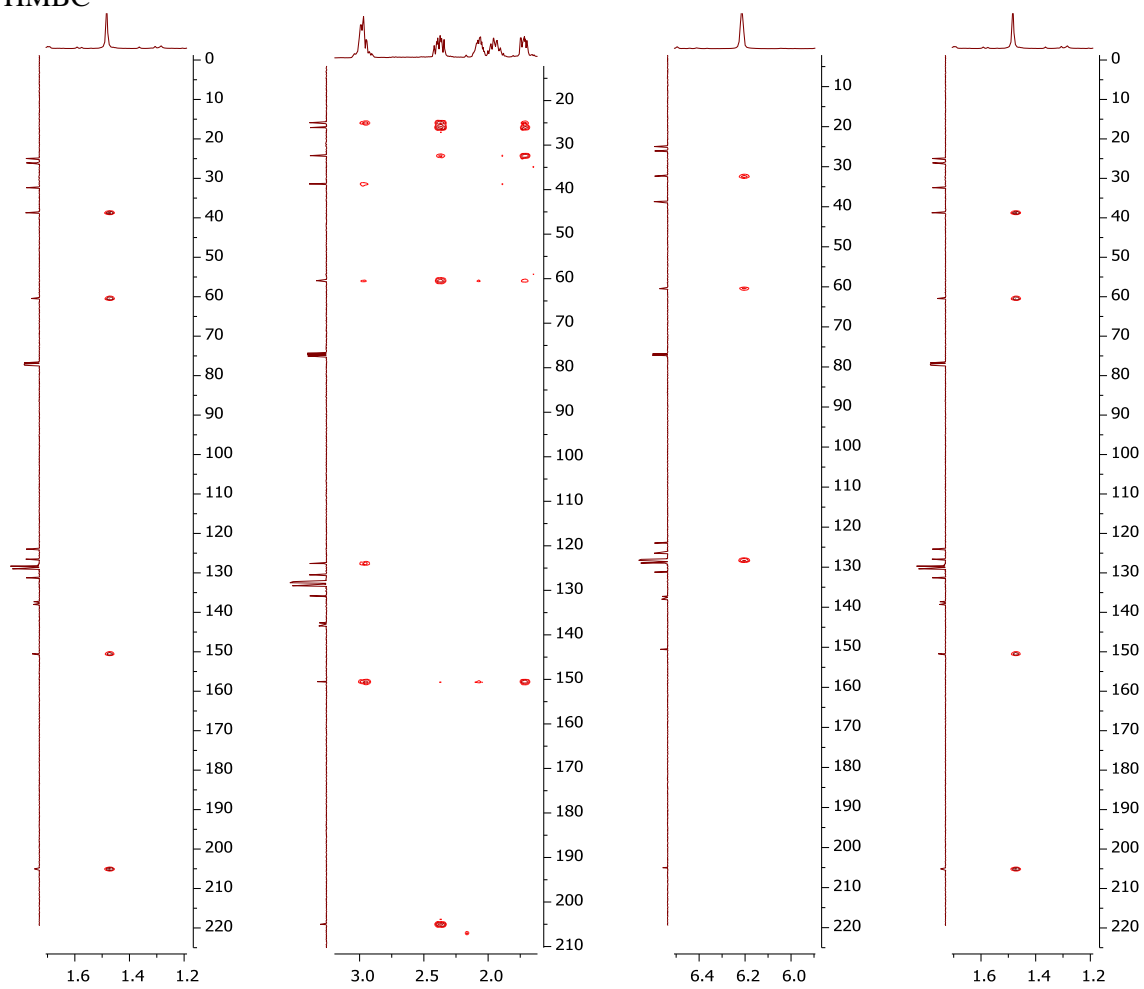

## Computational studies

All calculations were performed using Gaussian 09 package.<sup>4</sup> Structures of minima and transition states were optimized employing B3LYP functional with the D3 version of Grimme's empirical dispersion correction<sup>5</sup> Def2-SVP bases set<sup>6</sup> and SMD solvation model.<sup>7</sup> Frequency calculations were then performed at the same level of theory to confirm the nature of stationary points and provide corrections to thermodynamic functions. Single point energies were calculated at M06 level of theory using Def2-TZVPP basis set and SMD solvation model. Various conformers of intermediates and transition states were investigated and only the lowest energy conformers are shown in the work. Structures were visualized using: CYLview, 1.0b; Legault, C. Y., Université de Sherbrooke, 2009 (<http://www.cylview.org>)

### Optimized geometries, energies and corrections to thermodynamic functions.

#### Model studies (Scheme 2)

#### [(PMe<sub>3</sub>)<sub>2</sub>PdPhBr] [Propyn]

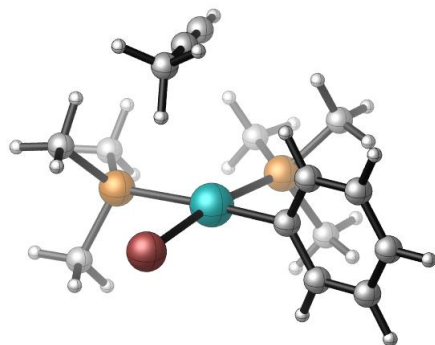

E (SMD(Acetonitrile)/B3LYP-D3/Def2-SVP) = -3971.898152

E (SMD(Acetonitrile)/M06/Def2-TZVPP//SMD(Acetonitrile)/B3LYP-D3/Def2-SVP) = -3972.394484

|                                          |                             |
|------------------------------------------|-----------------------------|
| Zero-point correction=                   | 0.376302 (Hartree/Particle) |
| Thermal correction to Energy=            | 0.405252                    |
| Thermal correction to Enthalpy=          | 0.406197                    |
| Thermal correction to Gibbs Free Energy= | 0.315467                    |

Charge = 0 Multiplicity = 1

|    |             |             |             |
|----|-------------|-------------|-------------|
| Pd | -0.09384700 | -0.01336900 | -0.33290800 |
| P  | 0.37620600  | 2.23990500  | -0.33017700 |
| C  | -1.01732400 | 3.42702100  | -0.23486500 |
| H  | -0.61624900 | 4.45223000  | -0.20044200 |
| H  | -1.65374600 | 3.31989300  | -1.12310700 |
| H  | -1.61499600 | 3.23849600  | 0.66698800  |
| C  | 1.23615200  | 2.78310200  | -1.85656400 |
| H  | 1.39206500  | 3.87332500  | -1.83038400 |
| H  | 2.20760600  | 2.27631300  | -1.93508500 |
| H  | 0.62320900  | 2.52069400  | -2.73234500 |
| C  | 1.47711500  | 2.83309400  | 1.01253300  |
| H  | 2.47110300  | 2.37870900  | 0.90914000  |
| H  | 1.56490800  | 3.92940300  | 0.95509200  |
| H  | 1.05517600  | 2.54902600  | 1.98769700  |
| P  | -2.52304800 | -0.06553200 | -0.51658300 |
| C  | -3.30292900 | -1.15780100 | 0.74163300  |

S27

|    |             |             |             |
|----|-------------|-------------|-------------|
| H  | -3.21029000 | -0.68603500 | 1.73112700  |
| H  | -4.36980100 | -1.30461300 | 0.50816500  |
| H  | -2.78343600 | -2.12551200 | 0.75277300  |
| C  | -3.02774400 | -0.82934100 | -2.11114800 |
| H  | -4.12061600 | -0.96250800 | -2.15755900 |
| H  | -2.70348500 | -0.17971000 | -2.93958700 |
| H  | -2.52521900 | -1.80266000 | -2.20739800 |
| C  | -3.64245200 | 1.39394900  | -0.43362600 |
| H  | -3.43358800 | 2.08760000  | -1.25973800 |
| H  | -4.68766500 | 1.05341300  | -0.50994600 |
| H  | -3.50616000 | 1.91917200  | 0.52271000  |
| C  | 1.93675200  | -0.22035400 | -0.16231900 |
| C  | 2.52338800  | -0.37347300 | 1.10742600  |
| C  | 2.77649400  | -0.31071300 | -1.28642500 |
| C  | 3.89688600  | -0.61258300 | 1.25017400  |
| H  | 1.90456800  | -0.30326900 | 2.00665900  |
| C  | 4.15239100  | -0.54726700 | -1.15018000 |
| H  | 2.35844300  | -0.19970200 | -2.29165500 |
| C  | 4.71992500  | -0.69878900 | 0.12029100  |
| H  | 4.32622500  | -0.72958600 | 2.25040200  |
| H  | 4.78260400  | -0.61338200 | -2.04286900 |
| H  | 5.79271600  | -0.88211900 | 0.22932000  |
| C  | -1.28833000 | 1.38769100  | 3.07132500  |
| C  | -0.97878900 | 0.21937000  | 3.18769100  |
| H  | -1.56219000 | 2.42387300  | 2.97364500  |
| C  | -0.61896600 | -1.18837800 | 3.30580400  |
| H  | 0.29276500  | -1.31326800 | 3.91254500  |
| H  | -1.42858700 | -1.76093400 | 3.78783500  |
| H  | -0.43279400 | -1.62849000 | 2.31140800  |
| Br | -0.19023900 | -2.57611800 | -0.44659200 |

**[(PMe<sub>3</sub>)<sub>2</sub>PdPh(Propyn)]<sup>+</sup> Br<sup>-</sup>**

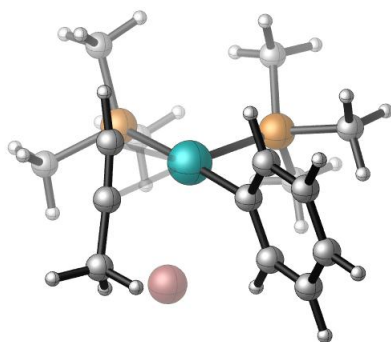

E (SMD(Acetonitrile)/B3LYP-D3/Def2-SVP) = -3971.880329

E (SMD(Acetonitrile)/M06/Def2-TZVPP//SMD(Acetonitrile)/B3LYP-D3/Def2-SVP) = -3972.379189

|                                          |                             |
|------------------------------------------|-----------------------------|
| Zero-point correction=                   | 0.375839 (Hartree/Particle) |
| Thermal correction to Energy=            | 0.404765                    |
| Thermal correction to Enthalpy=          | 0.405709                    |
| Thermal correction to Gibbs Free Energy= | 0.315537                    |



Charge = 0 Multiplicity = 1

|    |             |             |             |
|----|-------------|-------------|-------------|
| Pd | -0.03271300 | -0.08786800 | -0.52611200 |
| P  | 0.12442100  | -2.12182500 | 0.56552200  |
| C  | -0.90908300 | -3.46688900 | -0.13753000 |
| H  | -0.75765900 | -4.39141500 | 0.44253500  |
| H  | -1.97303900 | -3.19743300 | -0.11244400 |
| H  | -0.60971000 | -3.64052000 | -1.18229100 |
| C  | -0.37605500 | -2.01714300 | 2.32129600  |
| H  | -0.27554000 | -3.00425800 | 2.80045800  |
| H  | 0.26325200  | -1.27794600 | 2.82387500  |
| H  | -1.41203700 | -1.66289000 | 2.39091600  |
| C  | 1.76753200  | -2.93079500 | 0.65821200  |
| H  | 2.46928500  | -2.28820900 | 1.20738700  |
| H  | 1.66545500  | -3.89679900 | 1.17775500  |
| H  | 2.15861200  | -3.09669300 | -0.35583100 |
| P  | -2.44481400 | -0.10968800 | -0.73831800 |
| C  | -3.11747900 | 1.57572300  | -1.01426300 |
| H  | -2.70532100 | 1.99652400  | -1.94241200 |
| H  | -4.21672000 | 1.54275900  | -1.08276800 |
| H  | -2.80663700 | 2.19964900  | -0.16289900 |
| C  | -3.45695200 | -0.69415800 | 0.67574000  |
| H  | -4.52857100 | -0.56658900 | 0.45313800  |
| H  | -3.25733500 | -1.75468400 | 0.88362900  |
| H  | -3.17637300 | -0.09145700 | 1.55219800  |
| C  | -3.10814500 | -1.05886600 | -2.16739100 |
| H  | -2.84849100 | -2.12246900 | -2.05761100 |
| H  | -4.20314600 | -0.95640100 | -2.23839300 |
| H  | -2.64939900 | -0.68160000 | -3.09467700 |
| C  | 2.00536000  | 0.02987200  | -0.34625800 |
| C  | 2.86392200  | -0.42372800 | -1.36367900 |
| C  | 2.57972800  | 0.64740900  | 0.77998600  |
| C  | 4.25372700  | -0.26614100 | -1.26326000 |
| H  | 2.45215200  | -0.91158500 | -2.25312100 |
| C  | 3.96984100  | 0.80504300  | 0.88326800  |
| H  | 1.92565300  | 1.02047400  | 1.57438100  |
| C  | 4.81351400  | 0.34662900  | -0.13584100 |
| H  | 4.90111900  | -0.62703000 | -2.06887200 |
| H  | 4.39593800  | 1.29059700  | 1.76736300  |
| H  | 5.89749900  | 0.46772200  | -0.05359500 |
| C  | -0.03358500 | 1.13382500  | -2.53069100 |
| C  | 0.26716900  | 2.04973100  | -1.76975700 |
| H  | -0.28909600 | 0.49872200  | -3.36504900 |
| C  | 0.65036200  | 3.21084800  | -0.97886800 |
| H  | 1.72843800  | 3.17533500  | -0.75328100 |
| H  | 0.43555100  | 4.13717000  | -1.53689500 |
| H  | 0.10549300  | 3.21099100  | -0.01883500 |
| Br | -0.83993700 | 1.67127200  | 2.00950400  |

**[(PMe<sub>3</sub>)<sub>2</sub>PdPhI] [Propyn]**

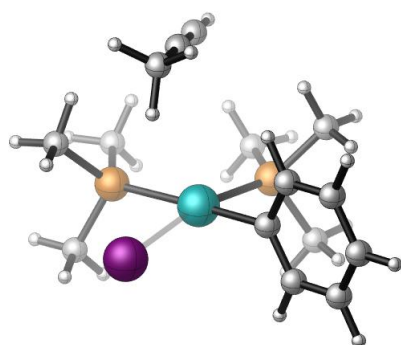

E (SMD(Acetonitrile)/B3LYP-D3/Def2-SVP) = -1695.824172

E (SMD(Acetonitrile)/M06/Def2-TZVPP//SMD(Acetonitrile)/B3LYP-D3/Def2-SVP) = -1696.098331

|                                          |                             |
|------------------------------------------|-----------------------------|
| Zero-point correction=                   | 0.376079 (Hartree/Particle) |
| Thermal correction to Energy=            | 0.405284                    |
| Thermal correction to Enthalpy=          | 0.406228                    |
| Thermal correction to Gibbs Free Energy= | 0.313996                    |

Charge = 0 Multiplicity = 1

|    |             |             |             |
|----|-------------|-------------|-------------|
| Pd | -0.09449300 | 0.14154600  | -0.29920000 |
| P  | 0.26833900  | 2.39463200  | -0.63595300 |
| C  | -1.18271500 | 3.49506100  | -0.83203900 |
| H  | -0.82516400 | 4.52538400  | -0.98615700 |
| H  | -1.76741900 | 3.18212900  | -1.70735400 |
| H  | -1.81394600 | 3.46058600  | 0.06512000  |
| C  | 1.19477300  | 2.72205200  | -2.18411600 |
| H  | 1.27116000  | 3.80919100  | -2.34433800 |
| H  | 2.20186900  | 2.28991900  | -2.11699800 |
| H  | 0.66221300  | 2.26336100  | -3.03107700 |
| C  | 1.24283800  | 3.26621600  | 0.64897300  |
| H  | 2.26394500  | 2.86521600  | 0.68381200  |
| H  | 1.27649100  | 4.34030900  | 0.40790400  |
| H  | 0.76712300  | 3.12499600  | 1.63038500  |
| P  | -2.52323400 | -0.04797400 | -0.47324300 |
| C  | -3.26411000 | -1.04067000 | 0.88899500  |
| H  | -3.18950600 | -0.46988400 | 1.82631100  |
| H  | -4.32616900 | -1.23843700 | 0.67218100  |
| H  | -2.72802000 | -1.99223600 | 1.00412300  |
| C  | -3.02289300 | -0.96270300 | -1.98843600 |
| H  | -4.11374200 | -1.11655000 | -2.00945400 |
| H  | -2.71912400 | -0.38258300 | -2.87400900 |
| H  | -2.51202000 | -1.93629200 | -2.01291700 |
| C  | -3.69203600 | 1.37351800  | -0.50227300 |
| H  | -3.53876200 | 1.98315900  | -1.40245200 |
| H  | -4.72374500 | 0.98698100  | -0.50537500 |
| H  | -3.54683100 | 1.99870300  | 0.39022400  |
| C  | 1.94562000  | 0.10522300  | -0.06665000 |
| C  | 2.50004900  | 0.20870800  | 1.22214600  |
| C  | 2.82074700  | -0.12983900 | -1.14227200 |
| C  | 3.87962200  | 0.07432900  | 1.43130600  |

|   |             |             |             |
|---|-------------|-------------|-------------|
| H | 1.85317600  | 0.40136600  | 2.08270000  |
| C | 4.20179500  | -0.26103500 | -0.93862100 |
| H | 2.42671200  | -0.21895000 | -2.15909700 |
| C | 4.73788300  | -0.15939600 | 0.35037700  |
| H | 4.28442800  | 0.15663000  | 2.44485200  |
| H | 4.86046500  | -0.44564000 | -1.79300900 |
| H | 5.81483800  | -0.26124700 | 0.51113500  |
| C | -1.64068600 | 2.18296700  | 2.78449800  |
| C | -1.20801200 | 1.08956400  | 3.08636400  |
| H | -2.02132100 | 3.15528700  | 2.52383200  |
| C | -0.69472700 | -0.22971100 | 3.43506300  |
| H | 0.22559900  | -0.14985100 | 4.03594800  |
| H | -1.43558700 | -0.79898400 | 4.02000700  |
| H | -0.45959800 | -0.80796000 | 2.52668200  |
| I | 0.05800300  | -2.65738300 | -0.16305100 |

**[(PMe<sub>3</sub>)<sub>2</sub>PdPh(Propyn)]<sup>+</sup> I<sup>-</sup>**

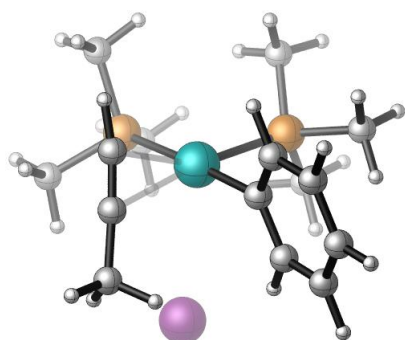

E (SMD(Acetonitrile)/B3LYP-D3/Def2-SVP) = -1695.822354

E (SMD(Acetonitrile)/M06/Def2-TZVPP//SMD(Acetonitrile)/B3LYP-D3/Def2-SVP) = -1696.091996

|                                          |                             |
|------------------------------------------|-----------------------------|
| Zero-point correction=                   | 0.375771 (Hartree/Particle) |
| Thermal correction to Energy=            | 0.404859                    |
| Thermal correction to Enthalpy=          | 0.405804                    |
| Thermal correction to Gibbs Free Energy= | 0.314443                    |

Charge = 0 Multiplicity = 1

|    |             |             |             |
|----|-------------|-------------|-------------|
| Pd | -0.33278600 | -0.67252000 | 0.45789400  |
| P  | -0.63278000 | -1.43217900 | -1.70432500 |
| C  | -0.20627400 | -3.20637200 | -1.88252900 |
| H  | -0.40857900 | -3.52661800 | -2.91696700 |
| H  | 0.85245400  | -3.38135700 | -1.65086200 |
| H  | -0.82705300 | -3.79512800 | -1.19044800 |
| C  | 0.37274700  | -0.56523400 | -2.96002900 |
| H  | 0.21797900  | -1.03980400 | -3.94221000 |
| H  | 0.05763400  | 0.48738600  | -3.00247600 |
| H  | 1.43539100  | -0.60326300 | -2.68905900 |
| C  | -2.31962200 | -1.37073700 | -2.41262700 |
| H  | -2.66124600 | -0.32892400 | -2.47889700 |
| H  | -2.29923000 | -1.82013500 | -3.41804200 |
| H  | -3.01227200 | -1.93201700 | -1.76965500 |

|   |             |             |             |
|---|-------------|-------------|-------------|
| P | 1.90812400  | -1.57840600 | 0.75094800  |
| C | 2.86459000  | -0.67933700 | 2.03512400  |
| H | 2.32651000  | -0.71210400 | 2.99280900  |
| H | 3.85835700  | -1.13903600 | 2.15635500  |
| H | 2.98078600  | 0.37005400  | 1.72496800  |
| C | 3.09920900  | -1.62099200 | -0.64538800 |
| H | 4.05940600  | -2.03715100 | -0.30113400 |
| H | 2.71481300  | -2.23925900 | -1.46829100 |
| H | 3.25615200  | -0.59529500 | -1.01081900 |
| C | 1.90157600  | -3.30834500 | 1.36655700  |
| H | 1.42404200  | -3.96113800 | 0.62075000  |
| H | 2.92719000  | -3.66131600 | 1.56002600  |
| H | 1.31851700  | -3.35564900 | 2.29918400  |
| C | -2.19384900 | 0.16024500  | 0.29474900  |
| C | -3.33556100 | -0.49935700 | 0.78204700  |
| C | -2.34650100 | 1.45614700  | -0.22966900 |
| C | -4.59341300 | 0.11931400  | 0.75386800  |
| H | -3.25327900 | -1.51114300 | 1.19163600  |
| C | -3.60344100 | 2.07852600  | -0.25610200 |
| H | -1.47892700 | 1.99364200  | -0.62437600 |
| C | -4.73211900 | 1.41169100  | 0.23374200  |
| H | -5.46872600 | -0.41258600 | 1.13963800  |
| H | -3.69862800 | 3.08910200  | -0.66541300 |
| H | -5.71297000 | 1.89478800  | 0.20964100  |
| C | -0.51776400 | -0.80373300 | 2.78994300  |
| C | -0.36924600 | 0.41150800  | 2.71558100  |
| H | -0.65597300 | -1.83686700 | 3.07174300  |
| C | -0.21803400 | 1.85808300  | 2.74462900  |
| H | -0.35888900 | 2.22581800  | 3.77432900  |
| H | 0.78139100  | 2.15490200  | 2.39122600  |
| H | -0.96642300 | 2.33493500  | 2.09247000  |
| I | 1.81048600  | 2.39215800  | -0.69505700 |

**[(PMe<sub>3</sub>)<sub>2</sub>PdPhOTf] [Propyn]**

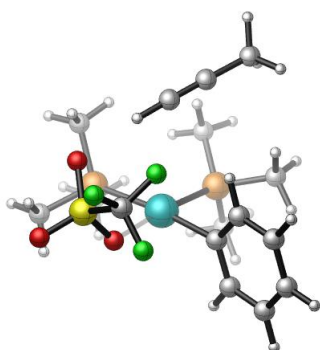

E (SMD(Acetonitrile)/B3LYP-D3/Def2-SVP) = -2358.909296

E (SMD(Acetonitrile)/M06/Def2-TZVPP//SMD(Acetonitrile)/B3LYP-D3/Def2-SVP) = -2359.837864

|                                          |                             |
|------------------------------------------|-----------------------------|
| Zero-point correction=                   | 0.404558 (Hartree/Particle) |
| Thermal correction to Energy=            | 0.440089                    |
| Thermal correction to Enthalpy=          | 0.441033                    |
| Thermal correction to Gibbs Free Energy= | 0.335245                    |

Charge = 0 Multiplicity = 1

|    |             |             |             |
|----|-------------|-------------|-------------|
| Pd | -0.61485500 | -0.12485000 | -0.56311700 |
| P  | -2.64659700 | 0.74582800  | -0.07650200 |
| C  | -3.61647300 | -0.20316300 | 1.15491600  |
| H  | -4.54250000 | 0.34696000  | 1.38389800  |
| H  | -3.87653400 | -1.19584200 | 0.76668400  |
| H  | -3.02153000 | -0.32235500 | 2.07070900  |
| C  | -3.71471000 | 0.83324600  | -1.55792000 |
| H  | -4.70413300 | 1.23515000  | -1.28742200 |
| H  | -3.23897800 | 1.49278800  | -2.29919300 |
| H  | -3.82664400 | -0.17110900 | -1.99082800 |
| C  | -2.70640800 | 2.44331400  | 0.60585000  |
| H  | -2.35878700 | 3.16023600  | -0.14968400 |
| H  | -3.74395100 | 2.67653200  | 0.89178300  |
| H  | -2.05427600 | 2.51159700  | 1.48724000  |
| P  | -1.24655700 | -2.47131000 | -0.50416200 |
| C  | -1.40122700 | -3.24004000 | 1.15393300  |
| H  | -2.15809800 | -2.70750400 | 1.74732800  |
| H  | -1.68204700 | -4.30197000 | 1.06625800  |
| H  | -0.42787000 | -3.15623700 | 1.65894500  |
| C  | -0.05142300 | -3.57600200 | -1.35984900 |
| H  | -0.45763600 | -4.59929900 | -1.40026400 |
| H  | 0.11817600  | -3.21108300 | -2.38393000 |
| H  | 0.90475400  | -3.59182000 | -0.82228900 |
| C  | -2.80931500 | -2.91503400 | -1.36622800 |
| H  | -2.73024600 | -2.60264600 | -2.41904100 |
| H  | -2.97365600 | -4.00362700 | -1.32392900 |
| H  | -3.67022500 | -2.40426600 | -0.91369600 |
| C  | 0.00429400  | 1.80665300  | -0.80695700 |
| C  | 0.61923300  | 2.53087000  | 0.22891400  |
| C  | -0.05818900 | 2.39528900  | -2.08288100 |
| C  | 1.17755300  | 3.79406200  | -0.00802000 |
| H  | 0.67124200  | 2.10966900  | 1.23549700  |
| C  | 0.49482200  | 3.66237300  | -2.32220400 |
| H  | -0.54264900 | 1.86717900  | -2.91088800 |
| C  | 1.11616500  | 4.36623700  | -1.28448100 |
| H  | 1.66036800  | 4.33553700  | 0.81161000  |
| H  | 0.43643000  | 4.10012200  | -3.32367700 |
| H  | 1.54726000  | 5.35446100  | -1.46824400 |
| C  | -0.03989800 | -0.20955200 | 2.84643900  |
| C  | -0.78254700 | 0.52998100  | 3.46037700  |
| H  | 0.63328400  | -0.84539900 | 2.28892000  |
| C  | -1.68550900 | 1.42372900  | 4.17713300  |
| H  | -1.34760300 | 2.47016400  | 4.09885400  |
| H  | -2.70610900 | 1.36704400  | 3.76403900  |
| H  | -1.73818600 | 1.16411600  | 5.24753300  |
| O  | 1.46557500  | -0.71464800 | -1.09408900 |
| S  | 2.44421700  | -1.39926100 | -0.17130200 |
| O  | 3.43326200  | -2.21186400 | -0.88886700 |
| O  | 1.81904800  | -2.00756800 | 1.02442200  |
| C  | 3.44278100  | 0.03361500  | 0.52708500  |
| F  | 2.76632500  | 0.65261400  | 1.49866000  |
| F  | 3.72704800  | 0.92191200  | -0.42647500 |
| F  | 4.58722200  | -0.42405100 | 1.03888100  |

**[(PMe<sub>3</sub>)<sub>2</sub>PdPh(Propyn)]<sup>+</sup> TfO<sup>-</sup>**

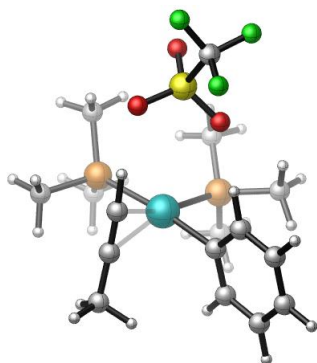

E (SMD(Acetonitrile)/B3LYP-D3/Def2-SVP) = -2358.904602

E (SMD(Acetonitrile)/M06/Def2-TZVPP//SMD(Acetonitrile)/B3LYP-D3/Def2-SVP) = -2359.838679

|                                          |                             |
|------------------------------------------|-----------------------------|
| Zero-point correction=                   | 0.404494 (Hartree/Particle) |
| Thermal correction to Energy=            | 0.439904                    |
| Thermal correction to Enthalpy=          | 0.440848                    |
| Thermal correction to Gibbs Free Energy= | 0.335139                    |

Charge = 0 Multiplicity = 1

|    |             |             |             |
|----|-------------|-------------|-------------|
| Pd | 1.10145300  | 0.27543600  | -0.23273200 |
| P  | 1.10050700  | 0.14147600  | 2.06606200  |
| C  | -0.06634300 | 1.28603700  | 2.89145400  |
| H  | -0.07905700 | 1.06933500  | 3.97132200  |
| H  | 0.24491200  | 2.32788400  | 2.74111800  |
| H  | -1.06923700 | 1.13495400  | 2.46869300  |
| C  | 2.73747100  | 0.53293800  | 2.78474600  |
| H  | 2.69142700  | 0.48970100  | 3.88471500  |
| H  | 3.47160000  | -0.20117900 | 2.41977200  |
| H  | 3.04889000  | 1.53823900  | 2.46635000  |
| C  | 0.66459200  | -1.46909000 | 2.81541200  |
| H  | 1.40910000  | -2.22882900 | 2.54384900  |
| H  | 0.63389300  | -1.35409000 | 3.91043200  |
| H  | -0.32253200 | -1.77108400 | 2.44102400  |
| P  | 0.80922200  | 2.68731100  | -0.37901800 |
| C  | 1.14501700  | 3.33364500  | -2.06623400 |
| H  | 0.39991400  | 2.93596900  | -2.77000700 |
| H  | 1.09522500  | 4.43414200  | -2.06428500 |
| H  | 2.14560100  | 3.01384700  | -2.39423900 |
| C  | 1.98176200  | 3.67019800  | 0.63993700  |
| H  | 1.85303400  | 4.74680000  | 0.44406000  |
| H  | 1.81649000  | 3.47658400  | 1.70931400  |
| H  | 3.01129900  | 3.37552600  | 0.38413200  |
| C  | -0.83036900 | 3.41931800  | -0.00644500 |
| H  | -1.12110700 | 3.20264500  | 1.02949500  |
| H  | -0.80163400 | 4.50956700  | -0.16392600 |
| H  | -1.57709100 | 2.95767900  | -0.66651100 |
| C  | 1.54332500  | -1.72221100 | -0.18122500 |
| C  | 0.53633100  | -2.68661500 | -0.36717200 |

|   |             |             |             |
|---|-------------|-------------|-------------|
| C | 2.87425900  | -2.15998300 | -0.06491600 |
| C | 0.85572100  | -4.04851700 | -0.44908700 |
| H | -0.50779700 | -2.36961600 | -0.42744400 |
| C | 3.19537100  | -3.52421300 | -0.14541200 |
| H | 3.68117600  | -1.43756000 | 0.09533600  |
| C | 2.18611700  | -4.47365700 | -0.33795500 |
| H | 0.05817100  | -4.78410800 | -0.59501600 |
| H | 4.23838800  | -3.84304600 | -0.05329100 |
| H | 2.43298300  | -5.53746500 | -0.39802600 |
| C | 0.41257500  | 0.08554600  | -2.45955600 |
| C | 1.62039600  | 0.06093800  | -2.66729200 |
| H | -0.66816100 | 0.12520300  | -2.35394300 |
| C | 3.03472000  | 0.00816800  | -3.01082800 |
| H | 3.51621700  | -0.85267900 | -2.52018000 |
| H | 3.15657800  | -0.09642700 | -4.10136300 |
| H | 3.55218500  | 0.92561800  | -2.68824400 |
| O | -1.73389400 | -0.68714500 | 0.75700000  |
| S | -2.68607000 | 0.22224900  | 0.07559700  |
| O | -2.28323900 | 0.67503100  | -1.28257700 |
| O | -3.27920200 | 1.26818800  | 0.93362400  |
| C | -4.11736700 | -0.92171700 | -0.30301300 |
| F | -3.70698100 | -1.94761300 | -1.06279000 |
| F | -4.63994200 | -1.42257000 | 0.82303600  |
| F | -5.08829000 | -0.27856600 | -0.96263800 |

**[(PMe<sub>3</sub>)<sub>2</sub>PdPh(acetylenic ketone)]<sup>+</sup>**

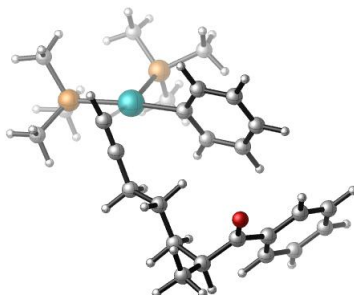

E (SMD(Acetonitrile)/B3LYP-D3/Def2-SVP) = -1899.149165

E (SMD(Acetonitrile)/M06/Def2-TZVPP//SMD(Acetonitrile)/B3LYP-D3/Def2-SVP) = -1899.601159

|                                          |                             |
|------------------------------------------|-----------------------------|
| Zero-point correction=                   | 0.581498 (Hartree/Particle) |
| Thermal correction to Energy=            | 0.619250                    |
| Thermal correction to Enthalpy=          | 0.620194                    |
| Thermal correction to Gibbs Free Energy= | 0.509500                    |

Charge = 1 Multiplicity = 1

|   |             |             |             |
|---|-------------|-------------|-------------|
| P | -2.86783500 | -2.02172800 | 0.25615200  |
| C | -4.64828500 | -2.31360900 | -0.05703900 |
| H | -4.89294200 | -3.35168100 | 0.21842900  |
| H | -5.27429400 | -1.62956400 | 0.52909900  |
| H | -4.85280200 | -2.16362300 | -1.12771800 |

|    |             |             |             |
|----|-------------|-------------|-------------|
| C  | -2.61636500 | -2.35965500 | 2.03459600  |
| H  | -3.01705900 | -3.35387500 | 2.28860200  |
| H  | -1.53742100 | -2.33302000 | 2.24905700  |
| H  | -3.12075800 | -1.58955500 | 2.63485300  |
| C  | -2.09981100 | -3.45692400 | -0.58049600 |
| H  | -1.03411600 | -3.51956500 | -0.32488400 |
| H  | -2.61574100 | -4.37368200 | -0.25439100 |
| H  | -2.20169100 | -3.34403100 | -1.66966400 |
| P  | -4.06232700 | 1.30446800  | 0.48302600  |
| C  | -3.73478700 | 3.09600200  | 0.71956200  |
| H  | -3.48783000 | 3.56405600  | -0.24393200 |
| H  | -4.62387800 | 3.58593700  | 1.14727500  |
| H  | -2.88185600 | 3.22537000  | 1.40322700  |
| C  | -4.71837400 | 0.82416500  | 2.13010500  |
| H  | -5.56182300 | 1.47656900  | 2.40680400  |
| H  | -5.05677500 | -0.22104300 | 2.12500800  |
| H  | -3.91679500 | 0.93200300  | 2.87690700  |
| C  | -5.53442900 | 1.29821500  | -0.61150300 |
| H  | -5.90378900 | 0.27052400  | -0.73811900 |
| H  | -6.33488300 | 1.92623100  | -0.18864400 |
| H  | -5.24514100 | 1.69202400  | -1.59824600 |
| C  | -0.38218400 | -0.86754900 | -0.84837600 |
| C  | -0.08489900 | -1.11400600 | -2.19897300 |
| C  | 0.58431100  | -1.19269300 | 0.11883800  |
| C  | 1.14908800  | -1.66315100 | -2.57440200 |
| H  | -0.81653100 | -0.87428400 | -2.97701400 |
| C  | 1.82175100  | -1.73683500 | -0.25350300 |
| H  | 0.38262900  | -1.02152700 | 1.18098100  |
| C  | 2.10636000  | -1.97609700 | -1.60255000 |
| H  | 1.36321000  | -1.84494600 | -3.63209300 |
| H  | 2.56849400  | -1.96922500 | 0.51075000  |
| H  | 3.07055500  | -2.40013800 | -1.89226300 |
| Pd | -2.11284200 | 0.08307500  | -0.30836700 |
| C  | -1.52188300 | 2.01888700  | -1.51261500 |
| C  | -0.70769300 | 2.09595100  | -0.59900900 |
| H  | -2.16780100 | 2.12293200  | -2.37160500 |
| C  | 0.33806000  | 2.27813900  | 0.40811100  |
| C  | 4.28143500  | 2.43619300  | 0.44712100  |
| C  | 1.75967500  | 2.24949000  | -0.18319000 |
| H  | 0.15773100  | 3.23844100  | 0.92251500  |
| H  | 0.23635400  | 1.49222000  | 1.17411400  |
| C  | 2.80792700  | 2.35573000  | 0.92594100  |
| C  | 4.65311700  | 1.19524100  | -0.36586600 |
| C  | 4.57239300  | 3.71317600  | -0.34474300 |
| H  | 1.86371700  | 3.07616400  | -0.90351800 |
| H  | 1.89478500  | 1.31293900  | -0.74717800 |
| H  | 2.68614700  | 1.49570400  | 1.60433700  |
| H  | 2.60890500  | 3.25685000  | 1.53175200  |
| C  | 4.95600200  | -0.09687800 | 0.34221600  |
| H  | 4.27676600  | 4.59997000  | 0.23803100  |
| H  | 4.03139500  | 3.72709200  | -1.30150200 |
| H  | 5.64652800  | 3.79658200  | -0.57429900 |
| C  | 4.88879600  | -0.24915000 | 1.73921400  |
| C  | 5.29925500  | -1.21197700 | -0.44519800 |



|   |            |             |             |
|---|------------|-------------|-------------|
| C | 5.13791700 | -1.49210500 | 2.32864700  |
| H | 4.63824900 | 0.59615700  | 2.38120200  |
| C | 5.55602000 | -2.44943600 | 0.14213600  |
| H | 5.34814700 | -1.08732200 | -1.52808700 |
| C | 5.46871100 | -2.59428400 | 1.53306000  |
| H | 5.07481500 | -1.59915500 | 3.41451500  |
| H | 5.81796500 | -3.30708800 | -0.48287600 |
| H | 5.66253000 | -3.56531800 | 1.99655500  |
| O | 4.68258400 | 1.24172400  | -1.58608400 |
| H | 4.90484900 | 2.44350600  | 1.35540300  |

**[(PMe<sub>3</sub>)<sub>2</sub>PdPh(acetylenic enol)]<sup>+</sup> (TS for cyclization)**

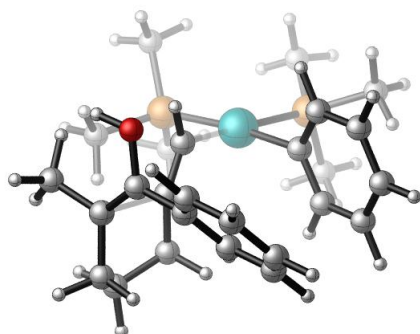

E (SMD(Acetonitrile)/B3LYP-D3/Def2-SVP) = -1899.115943

E (SMD(Acetonitrile)/M06/Def2-TZVPP//SMD(Acetonitrile)/B3LYP-D3/Def2-SVP) = -1899.563297

|                                          |                             |
|------------------------------------------|-----------------------------|
| Zero-point correction=                   | 0.580603 (Hartree/Particle) |
| Thermal correction to Energy=            | 0.617261                    |
| Thermal correction to Enthalpy=          | 0.618206                    |
| Thermal correction to Gibbs Free Energy= | 0.510804                    |

Charge = 1 Multiplicity = 1

|   |            |             |             |
|---|------------|-------------|-------------|
| P | 3.37674100 | 1.52508600  | 0.08184400  |
| C | 4.96670800 | 1.07919700  | -0.71801400 |
| H | 5.72422000 | 1.84450400  | -0.48566100 |
| H | 5.31930100 | 0.10315600  | -0.35922400 |
| H | 4.82253700 | 1.03061600  | -1.80792600 |
| C | 3.79180900 | 1.66162200  | 1.86182700  |
| H | 4.64503700 | 2.34306200  | 2.00871800  |
| H | 2.91540600 | 2.04992200  | 2.40253500  |
| H | 4.04110700 | 0.66559800  | 2.25674000  |
| C | 3.16905700 | 3.26965500  | -0.44281600 |
| H | 2.33927400 | 3.73019900  | 0.11018800  |
| H | 4.09929000 | 3.82606400  | -0.24683800 |
| H | 2.94123900 | 3.30461500  | -1.51879500 |
| P | 2.78512300 | -1.95946500 | -0.26286100 |
| C | 1.73923600 | -3.46448400 | -0.14343500 |
| H | 1.06765200 | -3.51779900 | -1.01222500 |
| H | 2.37393400 | -4.36435600 | -0.11215900 |
| H | 1.12655400 | -3.41577700 | 0.76871600  |
| C | 3.94562700 | -2.19219000 | 1.14277300  |

|    |             |             |             |
|----|-------------|-------------|-------------|
| H  | 4.42367200  | -3.18346500 | 1.08970600  |
| H  | 4.72186200  | -1.41426300 | 1.13172000  |
| H  | 3.38103200  | -2.11176300 | 2.08468100  |
| C  | 3.80447300  | -2.30750900 | -1.75012900 |
| H  | 4.56354200  | -1.52337100 | -1.87997200 |
| H  | 4.30095400  | -3.28694800 | -1.65896000 |
| H  | 3.14953300  | -2.31267500 | -2.63539900 |
| C  | 0.35388600  | 1.76597900  | -0.11659900 |
| C  | -0.17711800 | 2.40208100  | -1.25441300 |
| C  | -0.03536900 | 2.25557900  | 1.14540600  |
| C  | -1.06279200 | 3.48278000  | -1.13857300 |
| H  | 0.09674800  | 2.05253500  | -2.25528600 |
| C  | -0.92001700 | 3.33699100  | 1.26733000  |
| H  | 0.35441100  | 1.79271700  | 2.05793000  |
| C  | -1.43854400 | 3.95614400  | 0.12402400  |
| H  | -1.46341800 | 3.95537500  | -2.04092900 |
| H  | -1.20721400 | 3.69458000  | 2.26118400  |
| H  | -2.13236900 | 4.79631500  | 0.21615400  |
| Pd | 1.55382300  | 0.10221200  | -0.24882100 |
| C  | -0.27370100 | -0.90687200 | -0.63082300 |
| C  | -0.86089700 | -1.30678800 | 0.42580400  |
| H  | -0.60932100 | -0.91330800 | -1.67105100 |
| C  | -0.92268600 | -1.44088900 | 1.89654100  |
| C  | -2.78774000 | -2.47268300 | 0.07546800  |
| C  | -1.80630900 | -2.60728900 | 2.35352000  |
| H  | 0.11589800  | -1.57275100 | 2.24387000  |
| H  | -1.28433000 | -0.49329100 | 2.33140100  |
| C  | -3.11524300 | -2.58605400 | 1.54521200  |
| C  | -3.25177800 | -1.45254500 | -0.73537500 |
| C  | -2.22279600 | -3.72026600 | -0.57666100 |
| H  | -2.00466100 | -2.53602600 | 3.43345400  |
| H  | -1.27386600 | -3.55681200 | 2.18420000  |
| H  | -3.74745800 | -1.75096300 | 1.87635400  |
| H  | -3.68026300 | -3.51696000 | 1.72417100  |
| C  | -4.02093800 | -0.23835900 | -0.36193000 |
| H  | -1.62715400 | -4.30433600 | 0.13768400  |
| H  | -1.55485400 | -3.50819700 | -1.42790500 |
| H  | -3.04113000 | -4.37132900 | -0.93356700 |
| C  | -3.66191700 | 0.62123900  | 0.69047900  |
| C  | -5.14271200 | 0.08935500  | -1.15091600 |
| C  | -4.41742900 | 1.76499600  | 0.96120300  |
| H  | -2.77072900 | 0.42283300  | 1.28026600  |
| C  | -5.90083400 | 1.22721800  | -0.87143100 |
| H  | -5.42185700 | -0.55997700 | -1.98308400 |
| C  | -5.54138000 | 2.06948900  | 0.18725700  |
| H  | -4.11233300 | 2.42822700  | 1.77398600  |
| H  | -6.77415300 | 1.45983700  | -1.48626800 |
| H  | -6.13003700 | 2.96527000  | 0.40161200  |
| O  | -3.02588100 | -1.47786100 | -2.06006500 |
| H  | -2.64839700 | -2.33259200 | -2.33286400 |

**[(PMe<sub>3</sub>)<sub>2</sub>PdPh(acetylenic TMS-enolate)]<sup>+</sup>**

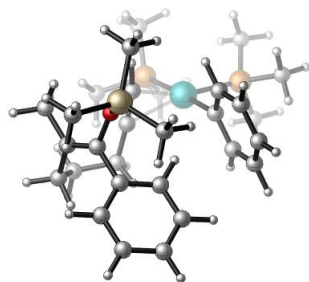

E (SMD(Acetonitrile)/B3LYP-D3/Def2-SVP) = -2307.694184

E (SMD(Acetonitrile)/M06/Def2-TZVPP//SMD(Acetonitrile)/B3LYP-D3/Def2-SVP) = -2308.237937

|                                          |                             |
|------------------------------------------|-----------------------------|
| Zero-point correction=                   | 0.680786 (Hartree/Particle) |
| Thermal correction to Energy=            | 0.726396                    |
| Thermal correction to Enthalpy=          | 0.727341                    |
| Thermal correction to Gibbs Free Energy= | 0.599955                    |

Charge = 1 Multiplicity = 1

|   |             |             |             |
|---|-------------|-------------|-------------|
| P | 3.89714200  | -1.55781300 | 0.10107000  |
| C | 5.30901200  | -1.14850600 | 1.19481700  |
| H | 6.04711500  | -1.96439100 | 1.14281800  |
| H | 5.79099200  | -0.21068500 | 0.89126500  |
| H | 4.94628900  | -1.05206600 | 2.22902700  |
| C | 4.61497900  | -1.73420900 | -1.57153200 |
| H | 5.45398200  | -2.44782400 | -1.54833800 |
| H | 3.83612200  | -2.10543500 | -2.25450200 |
| H | 4.96842800  | -0.75622100 | -1.92736400 |
| C | 3.52548300  | -3.27803400 | 0.60610800  |
| H | 2.80318400  | -3.73021800 | -0.08566100 |
| H | 4.46085400  | -3.85941600 | 0.59955800  |
| H | 3.09898200  | -3.27810400 | 1.61985900  |
| P | 3.55076400  | 1.96571200  | 0.17012600  |
| C | 2.68205200  | 3.52408600  | -0.26520800 |
| H | 1.83049500  | 3.67720700  | 0.41212400  |
| H | 3.37898700  | 4.37237000  | -0.17552100 |
| H | 2.31149800  | 3.46930100  | -1.29879000 |
| C | 5.00880600  | 2.01889800  | -0.94490100 |
| H | 5.54245800  | 2.97584100  | -0.83027800 |
| H | 5.69673200  | 1.19166300  | -0.72142100 |
| H | 4.66316700  | 1.91860800  | -1.98533400 |
| C | 4.22729000  | 2.35077600  | 1.83250600  |
| H | 4.86783000  | 1.52948900  | 2.18276300  |
| H | 4.80977300  | 3.28557400  | 1.80690900  |
| H | 3.38706800  | 2.46465500  | 2.53525100  |
| C | 0.92277600  | -1.66466800 | -0.01185900 |
| C | 0.21001800  | -2.12786000 | 1.10774400  |
| C | 0.72643000  | -2.31814000 | -1.24113300 |
| C | -0.66795900 | -3.21573500 | 1.00415200  |
| H | 0.33229100  | -1.64030500 | 2.07972200  |

|    |             |             |             |
|----|-------------|-------------|-------------|
| C  | -0.14762400 | -3.40952100 | -1.34696600 |
| H  | 1.26945300  | -1.98945500 | -2.13299300 |
| C  | -0.84735800 | -3.86364800 | -0.22378200 |
| H  | -1.21399500 | -3.55728400 | 1.88859900  |
| H  | -0.28210200 | -3.90478300 | -2.31318500 |
| H  | -1.53289200 | -4.71136100 | -0.30552600 |
| Pd | 2.14986100  | -0.02945000 | 0.10671300  |
| C  | 0.33148400  | 1.15896100  | 0.83036500  |
| C  | 0.18427800  | 1.38515700  | -0.36738300 |
| H  | 0.21815600  | 1.07078700  | 1.90006900  |
| C  | -0.06997100 | 1.77082600  | -1.75673600 |
| C  | -2.60731000 | 2.48268700  | -0.18695800 |
| C  | -0.82142600 | 3.11592700  | -1.89294200 |
| H  | 0.89974100  | 1.83906300  | -2.27632000 |
| H  | -0.63475000 | 0.96149700  | -2.25052300 |
| C  | -2.32953300 | 3.04108500  | -1.56457500 |
| C  | -3.00905000 | 1.20291700  | -0.00074900 |
| C  | -2.25177700 | 3.37301400  | 0.97424800  |
| H  | -0.70684600 | 3.45453600  | -2.93543300 |
| H  | -0.32143400 | 3.86936700  | -1.26341700 |
| H  | -2.81731000 | 2.43429300  | -2.33983100 |
| H  | -2.74521300 | 4.06093200  | -1.65115500 |
| C  | -3.44858400 | 0.27935200  | -1.08926200 |
| H  | -1.18840900 | 3.66695100  | 0.95117000  |
| H  | -2.44520400 | 2.88712800  | 1.93955400  |
| H  | -2.83517700 | 4.31068600  | 0.93059200  |
| C  | -2.74087900 | -0.90892200 | -1.34045400 |
| C  | -4.60685400 | 0.55021200  | -1.83803300 |
| C  | -3.17318100 | -1.79429600 | -2.33103900 |
| H  | -1.84829400 | -1.13772000 | -0.75545000 |
| C  | -5.04358600 | -0.33963700 | -2.82502600 |
| H  | -5.16929000 | 1.46554900  | -1.63719000 |
| C  | -4.32589900 | -1.51434900 | -3.07522500 |
| H  | -2.60796100 | -2.70973500 | -2.51894000 |
| H  | -5.94871600 | -0.11616100 | -3.39634700 |
| H  | -4.66499800 | -2.21197800 | -3.84578300 |
| O  | -2.95638100 | 0.63701600  | 1.24431000  |
| Si | -4.14160900 | -0.21973600 | 2.12267300  |
| C  | -5.69533100 | 0.83230200  | 2.16447700  |
| H  | -6.09659100 | 0.97232700  | 1.14634100  |
| H  | -6.48105600 | 0.35392800  | 2.77416800  |
| H  | -5.48858000 | 1.82833100  | 2.59096400  |
| C  | -4.48996300 | -1.89946100 | 1.36038800  |
| H  | -5.13273200 | -2.48540200 | 2.04101100  |
| H  | -5.00716500 | -1.81397600 | 0.39200000  |
| H  | -3.55632400 | -2.46354000 | 1.20303400  |
| C  | -3.35182000 | -0.41937500 | 3.80896000  |
| H  | -3.13314700 | 0.55945300  | 4.26767500  |
| H  | -4.01662800 | -0.97699300 | 4.49040900  |
| H  | -2.40442400 | -0.97912600 | 3.72576100  |

**$[(\text{PMe}_3)_2\text{PdPh}(\text{acetylenic TMS-enolate})]^+$  (TS for cyclization)**

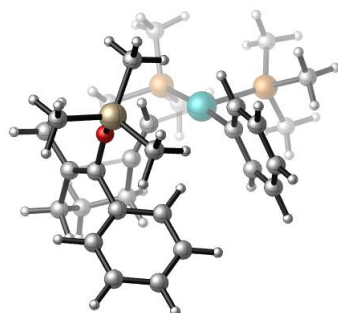

E (SMD(Acetonitrile)/B3LYP-D3/Def2-SVP) = -2307.686493

E (SMD(Acetonitrile)/M06/Def2-TZVPP//SMD(Acetonitrile)/B3LYP-D3/Def2-SVP) = -2308.224103

|                                          |                             |
|------------------------------------------|-----------------------------|
| Zero-point correction=                   | 0.680142 (Hartree/Particle) |
| Thermal correction to Energy=            | 0.723883                    |
| Thermal correction to Enthalpy=          | 0.724827                    |
| Thermal correction to Gibbs Free Energy= | 0.602140                    |

Charge = 1 Multiplicity = 1

|   |             |             |             |
|---|-------------|-------------|-------------|
| P | -3.94914200 | 1.39157000  | -0.02403500 |
| C | -5.41814300 | 0.87738700  | 0.94968200  |
| H | -6.22896600 | 1.60951500  | 0.80769600  |
| H | -5.76572900 | -0.11208800 | 0.62348700  |
| H | -5.15277600 | 0.83209200  | 2.01660200  |
| C | -4.58550700 | 1.50520800  | -1.73874000 |
| H | -5.46541400 | 2.16709400  | -1.78152000 |
| H | -3.79436100 | 1.90405700  | -2.39166000 |
| H | -4.86397100 | 0.49963700  | -2.08720100 |
| C | -3.75824200 | 3.14374400  | 0.48120600  |
| H | -3.02115900 | 3.64078200  | -0.16403300 |
| H | -4.72857500 | 3.65853600  | 0.40016100  |
| H | -3.40487100 | 3.18802200  | 1.52230200  |
| P | -3.16724900 | -2.05973200 | 0.26051300  |
| C | -2.09407400 | -3.53439600 | 0.05204400  |
| H | -1.32063300 | -3.54130600 | 0.83315000  |
| H | -2.69922800 | -4.45225300 | 0.12253700  |
| H | -1.60142200 | -3.49666900 | -0.92956400 |
| C | -4.47454700 | -2.36029500 | -0.99663600 |
| H | -4.92591700 | -3.35538100 | -0.85578600 |
| H | -5.25689700 | -1.59164500 | -0.92433500 |
| H | -4.02171100 | -2.30576500 | -1.99887000 |
| C | -3.99154900 | -2.41322800 | 1.86400300  |
| H | -4.76079900 | -1.65749000 | 2.07435000  |
| H | -4.45457000 | -3.41293400 | 1.84826400  |
| H | -3.23533300 | -2.37594700 | 2.66373400  |
| C | -0.92928000 | 1.77067400  | -0.11696300 |
| C | -0.30343800 | 2.40327300  | 0.97367600  |
| C | -0.71514400 | 2.31836900  | -1.39686100 |
| C | 0.50254500  | 3.53678300  | 0.79583900  |
| H | -0.43510400 | 2.00852500  | 1.98619300  |

|    |             |             |             |
|----|-------------|-------------|-------------|
| C  | 0.09022600  | 3.45137500  | -1.58139000 |
| H  | -1.18138600 | 1.85934800  | -2.27488400 |
| C  | 0.70345500  | 4.06718800  | -0.48414700 |
| H  | 0.97834600  | 4.00491000  | 1.66294500  |
| H  | 0.24082600  | 3.85256400  | -2.58839800 |
| H  | 1.33579500  | 4.94802100  | -0.62514900 |
| Pd | -2.03423500 | 0.05069600  | 0.10742700  |
| C  | -0.13154400 | -0.83423200 | 0.33057000  |
| C  | 0.41834300  | -1.39953200 | -0.67202500 |
| H  | 0.34198500  | -0.62722900 | 1.29590800  |
| C  | 0.42211700  | -1.87575700 | -2.06337700 |
| C  | 2.40309700  | -2.47284400 | -0.19092400 |
| C  | 1.11877600  | -3.23393600 | -2.19007000 |
| H  | -0.63391600 | -1.93369700 | -2.37820200 |
| H  | 0.91965200  | -1.12881700 | -2.70679400 |
| C  | 2.51739200  | -3.11114400 | -1.55575600 |
| C  | 2.82909800  | -1.18138300 | 0.06011100  |
| C  | 1.98837300  | -3.37220800 | 0.94601600  |
| H  | 1.19196500  | -3.53467200 | -3.24641800 |
| H  | 0.52612000  | -4.00191300 | -1.66741600 |
| H  | 3.15662400  | -2.51549000 | -2.22053600 |
| H  | 2.97951400  | -4.10732200 | -1.45845200 |
| C  | 3.43895600  | -0.26960700 | -0.95288400 |
| H  | 1.24064400  | -4.10792500 | 0.61495000  |
| H  | 1.57685700  | -2.80816200 | 1.79263500  |
| H  | 2.86698200  | -3.93654800 | 1.30804500  |
| C  | 2.76837300  | 0.90090400  | -1.34402300 |
| C  | 4.71852400  | -0.53724300 | -1.46549000 |
| C  | 3.36415500  | 1.78070500  | -2.24996500 |
| H  | 1.77870000  | 1.11899700  | -0.94003800 |
| C  | 5.31840500  | 0.35333000  | -2.36148400 |
| H  | 5.24567800  | -1.44220800 | -1.15326000 |
| C  | 4.64071100  | 1.51176300  | -2.75790600 |
| H  | 2.82789700  | 2.68311500  | -2.55287300 |
| H  | 6.31753900  | 0.14103300  | -2.75077300 |
| H  | 5.10802100  | 2.20551300  | -3.46181000 |
| O  | 2.65154500  | -0.67715900 | 1.28249300  |
| Si | 3.53813900  | 0.35273200  | 2.34889600  |
| C  | 5.01864600  | -0.65115300 | 2.90160500  |
| H  | 5.67320900  | -0.88090500 | 2.04366800  |
| H  | 5.61541600  | -0.09306300 | 3.64327700  |
| H  | 4.70250200  | -1.60335600 | 3.35930400  |
| C  | 4.05923900  | 1.94771900  | 1.52243700  |
| H  | 4.53136700  | 2.59599200  | 2.28179100  |
| H  | 4.78945300  | 1.77947000  | 0.71598300  |
| H  | 3.19394900  | 2.48547600  | 1.10548400  |
| C  | 2.29461400  | 0.65360100  | 3.71066200  |
| H  | 1.93604300  | -0.29819000 | 4.13646800  |
| H  | 2.74563200  | 1.24550700  | 4.52516900  |
| H  | 1.42491900  | 1.21182500  | 3.32530400  |

**[(PMe<sub>3</sub>)<sub>2</sub>PdPh(acetylenic enamine)]<sup>+</sup>**

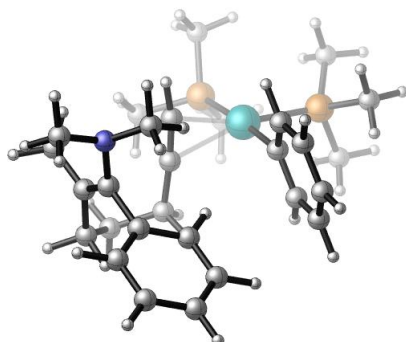

E (SMD(Acetonitrile)/B3LYP-D3/Def2-SVP) = -1957.834498

E (SMD(Acetonitrile)/M06/Def2-TZVPP//SMD(Acetonitrile)/B3LYP-D3/Def2-SVP) = -1958.268732

|                                          |                             |
|------------------------------------------|-----------------------------|
| Zero-point correction=                   | 0.648334 (Hartree/Particle) |
| Thermal correction to Energy=            | 0.689201                    |
| Thermal correction to Enthalpy=          | 0.690145                    |
| Thermal correction to Gibbs Free Energy= | 0.573870                    |

Charge = 1 Multiplicity = 1

|   |             |             |             |
|---|-------------|-------------|-------------|
| P | -3.68653200 | 1.44489400  | 0.12442600  |
| C | -5.20165400 | 0.85544600  | 0.96805500  |
| H | -5.96782100 | 1.64515300  | 0.91654800  |
| H | -5.59102900 | -0.05328600 | 0.49172000  |
| H | -4.96929700 | 0.64251700  | 2.02213600  |
| C | -4.20290000 | 1.80166500  | -1.59301200 |
| H | -5.06840100 | 2.48321100  | -1.59201900 |
| H | -3.36411300 | 2.27363200  | -2.12601800 |
| H | -4.46893500 | 0.86328500  | -2.10059400 |
| C | -3.45420700 | 3.09811000  | 0.87559800  |
| H | -2.67947100 | 3.65498800  | 0.33272400  |
| H | -4.40794700 | 3.64703200  | 0.83039300  |
| H | -3.14481200 | 2.98328800  | 1.92487500  |
| P | -3.16034700 | -2.05855400 | -0.09951600 |
| C | -2.12811100 | -3.51108400 | -0.54486600 |
| H | -1.39726300 | -3.70904400 | 0.25178600  |
| H | -2.77029700 | -4.39533900 | -0.68259500 |
| H | -1.58530300 | -3.30645400 | -1.47959500 |
| C | -4.41946700 | -2.06685100 | -1.43594600 |
| H | -4.90070300 | -3.05556600 | -1.50323200 |
| H | -5.18641300 | -1.30245400 | -1.24983300 |
| H | -3.92096800 | -1.84016700 | -2.39105100 |
| C | -4.05690200 | -2.65322300 | 1.38740000  |
| H | -4.80381200 | -1.91233500 | 1.70446700  |
| H | -4.55746200 | -3.61216800 | 1.17824000  |
| H | -3.33085200 | -2.79214200 | 2.20365500  |
| C | -0.72739100 | 1.68635600  | 0.24769700  |
| C | -0.13472200 | 2.09605700  | 1.45428500  |
| C | -0.44154000 | 2.41941800  | -0.91712200 |
| C | 0.71584800  | 3.20971600  | 1.49748700  |
| H | -0.33082500 | 1.54536200  | 2.37945900  |

|    |             |             |             |
|----|-------------|-------------|-------------|
| C  | 0.40602600  | 3.53598100  | -0.87624600 |
| H  | -0.88999200 | 2.13266500  | -1.87352900 |
| C  | 0.98628600  | 3.93635400  | 0.33222900  |
| H  | 1.16973300  | 3.50899900  | 2.44712000  |
| H  | 0.61390700  | 4.09309400  | -1.79471700 |
| H  | 1.65095500  | 4.80380400  | 0.36424600  |
| Pd | -1.87862400 | -0.00426400 | 0.15405400  |
| C  | -0.03500300 | -1.22715900 | 0.82558800  |
| C  | 0.18433800  | -1.17729700 | -0.38088100 |
| H  | -0.01821600 | -1.37596500 | 1.89471100  |
| C  | 0.53215300  | -1.21454400 | -1.80265200 |
| C  | 3.04377400  | -2.21379300 | -0.17292500 |
| C  | 1.44953900  | -2.39424700 | -2.18750500 |
| H  | -0.40448700 | -1.27894900 | -2.38091400 |
| H  | 1.00259400  | -0.25469300 | -2.07477900 |
| C  | 2.89957400  | -2.28636300 | -1.67758200 |
| C  | 3.57656100  | -1.13807100 | 0.45447700  |
| C  | 2.59706000  | -3.43126900 | 0.59360600  |
| H  | 1.47280000  | -2.44072900 | -3.28813900 |
| H  | 0.98380600  | -3.33333100 | -1.84801600 |
| H  | 3.37414000  | -1.41422400 | -2.15043000 |
| H  | 3.44237000  | -3.17770000 | -2.04468500 |
| C  | 4.08577000  | 0.07084700  | -0.27584800 |
| N  | 3.73087000  | -1.12255700 | 1.88012000  |
| H  | 1.66857600  | -3.85227700 | 0.17731400  |
| H  | 2.43398200  | -3.19817000 | 1.65492100  |
| H  | 3.35768700  | -4.23176900 | 0.53633500  |
| C  | 3.23320700  | 1.10409200  | -0.70023000 |
| C  | 5.46931600  | 0.20935500  | -0.49687500 |
| C  | 3.48316500  | 0.15344800  | 2.53052000  |
| C  | 4.90957100  | -1.80363500 | 2.39759500  |
| C  | 3.74713800  | 2.23205300  | -1.35009100 |
| H  | 2.15990000  | 1.02901100  | -0.51307300 |
| C  | 5.98420600  | 1.33791100  | -1.14258000 |
| H  | 6.14501800  | -0.58572400 | -0.17172100 |
| H  | 4.30155600  | 0.89311400  | 2.39514100  |
| H  | 3.35931100  | -0.00868600 | 3.61443000  |
| H  | 2.55500800  | 0.60396600  | 2.14835700  |
| H  | 5.84803500  | -1.22899800 | 2.23868300  |
| H  | 5.02736100  | -2.78560700 | 1.91709300  |
| H  | 4.80185800  | -1.96687000 | 3.48365500  |
| C  | 5.12247300  | 2.35249100  | -1.57530000 |
| H  | 3.06620200  | 3.02135400  | -1.67579800 |
| H  | 7.06108800  | 1.42227300  | -1.31361000 |
| H  | 5.52169200  | 3.23424800  | -2.08391600 |



**$[(\text{PMe}_3)_2\text{PdPh}(\text{acetylenic enamine})]^+$  (TS for cyclization)**

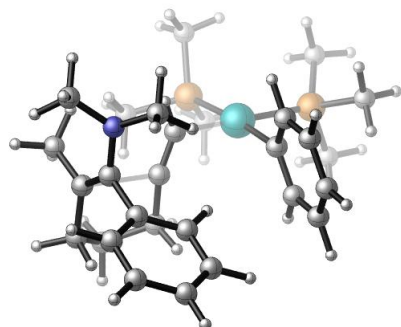

E (SMD(Acetonitrile)/B3LYP-D3/Def2-SVP) = -1957.826873

E (SMD(Acetonitrile)/M06/Def2-TZVPP//SMD(Acetonitrile)/B3LYP-D3/Def2-SVP) = -1958.255849

|                                          |                             |
|------------------------------------------|-----------------------------|
| Zero-point correction=                   | 0.648238 (Hartree/Particle) |
| Thermal correction to Energy=            | 0.688076                    |
| Thermal correction to Enthalpy=          | 0.689021                    |
| Thermal correction to Gibbs Free Energy= | 0.575500                    |

Charge = 1 Multiplicity = 1

|   |             |             |             |
|---|-------------|-------------|-------------|
| P | -3.71852000 | 1.29608700  | -0.01053500 |
| C | -5.21938900 | 0.62702800  | 0.80442900  |
| H | -6.05593100 | 1.33104300  | 0.67003400  |
| H | -5.49355500 | -0.34445700 | 0.37236400  |
| H | -5.02074700 | 0.49959300  | 1.87928600  |
| C | -4.21512200 | 1.53101200  | -1.75842400 |
| H | -5.13504300 | 2.13444400  | -1.81874800 |
| H | -3.40292700 | 2.04644300  | -2.29312100 |
| H | -4.38421900 | 0.55043500  | -2.22660900 |
| C | -3.65984400 | 3.00500400  | 0.64979300  |
| H | -2.90339500 | 3.58886900  | 0.10829400  |
| H | -4.64796100 | 3.47688900  | 0.53126800  |
| H | -3.39141000 | 2.97797500  | 1.71640200  |
| P | -2.80945100 | -2.13313600 | -0.03257100 |
| C | -1.63591800 | -3.50487300 | -0.36844300 |
| H | -0.92507200 | -3.59550100 | 0.46483400  |
| H | -2.18646200 | -4.45138000 | -0.48890700 |
| H | -1.07132600 | -3.28909700 | -1.28753100 |
| C | -4.02163800 | -2.32825400 | -1.39942100 |
| H | -4.40211600 | -3.36173900 | -1.43197400 |
| H | -4.86490300 | -1.63604700 | -1.26814400 |
| H | -3.52093800 | -2.09649800 | -2.35229600 |
| C | -3.70653700 | -2.73261800 | 1.45323900  |
| H | -4.52398600 | -2.04206600 | 1.70458400  |
| H | -4.11767100 | -3.73987600 | 1.27859200  |
| H | -3.00408700 | -2.76833500 | 2.30056100  |
| C | -0.74243500 | 1.80714800  | 0.22101200  |
| C | -0.25389500 | 2.34685700  | 1.42494100  |
| C | -0.42240200 | 2.47763500  | -0.97449600 |
| C | 0.52889600  | 3.51029500  | 1.43556900  |
| H | -0.47487200 | 1.85378600  | 2.37684800  |

|    |             |             |             |
|----|-------------|-------------|-------------|
| C  | 0.35711100  | 3.64348200  | -0.96941400 |
| H  | -0.78339200 | 2.09281300  | -1.93392200 |
| C  | 0.83734700  | 4.16497200  | 0.23740400  |
| H  | 0.90191900  | 3.90447700  | 2.38600300  |
| H  | 0.59240000  | 4.14386700  | -1.91385300 |
| H  | 1.45004300  | 5.07062400  | 0.24352500  |
| Pd | -1.76800500 | 0.02950000  | 0.16095500  |
| C  | 0.15216500  | -0.86156200 | 0.49119500  |
| C  | 0.72865900  | -1.07016200 | -0.60973800 |
| H  | 0.47602800  | -0.95782300 | 1.53041500  |
| C  | 0.96066300  | -1.12262600 | -2.05424400 |
| C  | 2.87784600  | -2.21775100 | -0.20452000 |
| C  | 1.83194100  | -2.31296500 | -2.48454100 |
| H  | -0.03207700 | -1.18034700 | -2.53371300 |
| H  | 1.42557600  | -0.17708600 | -2.38145300 |
| C  | 3.15128600  | -2.31690500 | -1.68864500 |
| C  | 3.24795400  | -1.11151500 | 0.53373700  |
| C  | 2.27248100  | -3.45091000 | 0.42386800  |
| H  | 2.03085100  | -2.24750000 | -3.56551500 |
| H  | 1.27671700  | -3.24949700 | -2.31594900 |
| H  | 3.77934100  | -1.48211000 | -2.02958100 |
| H  | 3.70220000  | -3.24852300 | -1.90915100 |
| C  | 3.89618100  | 0.08689100  | -0.10617400 |
| N  | 3.05655400  | -1.03052600 | 1.91071500  |
| H  | 1.58863300  | -3.94888500 | -0.27881300 |
| H  | 1.70411300  | -3.21683100 | 1.33462000  |
| H  | 3.04850100  | -4.19132000 | 0.68807100  |
| C  | 3.17363500  | 1.17972000  | -0.60968800 |
| C  | 5.30123200  | 0.12637200  | -0.15246800 |
| C  | 2.94023400  | 0.27794300  | 2.54144000  |
| C  | 3.60741600  | -2.04230900 | 2.80961500  |
| C  | 3.84016100  | 2.27621300  | -1.16705000 |
| H  | 2.08471800  | 1.18592800  | -0.55126300 |
| C  | 5.96746500  | 1.22019200  | -0.71360900 |
| H  | 5.87454600  | -0.71444900 | 0.24732600  |
| H  | 3.92191000  | 0.76728500  | 2.69357700  |
| H  | 2.46923400  | 0.15023700  | 3.52860400  |
| H  | 2.30090000  | 0.94662400  | 1.95255500  |
| H  | 4.49812900  | -1.64031300 | 3.33006100  |
| H  | 3.92583100  | -2.93507400 | 2.26285900  |
| H  | 2.87201700  | -2.33912600 | 3.57622700  |
| C  | 5.23723500  | 2.29876900  | -1.22592600 |
| H  | 3.25785600  | 3.11758800  | -1.55054800 |
| H  | 7.06024200  | 1.22943400  | -0.75029800 |
| H  | 5.75593000  | 3.15544700  | -1.66452300 |

## Gibbs free energy profile for model reaction with PhOTf (Figure 2)

### PhOTf

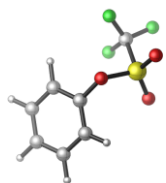

E (SMD(Acetone)/B3LYP-D3/Def2-SVP) = -1192.368827

E (SMD(Acetone)/M06/Def2-TZVPP//SMD(Acetone)/B3LYP-D3/Def2-SVP) = -1193.052361

|                                          |                             |
|------------------------------------------|-----------------------------|
| Zero-point correction=                   | 0.119172 (Hartree/Particle) |
| Thermal correction to Energy=            | 0.131410                    |
| Thermal correction to Enthalpy=          | 0.132354                    |
| Thermal correction to Gibbs Free Energy= | 0.078306                    |

Charge = 0 Multiplicity = 1

|   |             |             |             |
|---|-------------|-------------|-------------|
| S | 1.20889100  | -0.91349100 | 0.05393400  |
| O | 0.74280400  | -1.40803200 | -1.23085700 |
| O | 2.19838100  | -1.59618600 | 0.86282300  |
| O | -0.04482200 | -0.60317600 | 1.05776600  |
| C | 1.83572600  | 0.84254900  | -0.22686600 |
| F | 2.02489300  | 1.43834900  | 0.94045700  |
| F | 2.98057500  | 0.77319800  | -0.88960600 |
| F | 0.94434700  | 1.51887600  | -0.93894400 |
| C | -1.30627600 | -0.24893400 | 0.53819000  |
| C | -2.11764700 | -1.23126800 | -0.02737800 |
| C | -1.71719300 | 1.07694100  | 0.66756900  |
| C | -3.38792700 | -0.86447500 | -0.48144100 |
| H | -1.75618400 | -2.25764000 | -0.10598100 |
| C | -2.99236300 | 1.42667200  | 0.21382400  |
| H | -1.04714800 | 1.81140700  | 1.11818700  |
| C | -3.82533200 | 0.45987300  | -0.36153700 |
| H | -4.03835100 | -1.62054500 | -0.92803700 |
| H | -3.33335100 | 2.46039400  | 0.31013300  |
| H | -4.82037700 | 0.73943500  | -0.71642500 |

### LPd

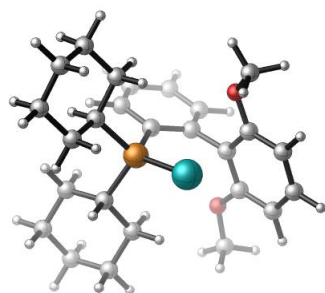

E (SMD(Acetone)/B3LYP-D3/Def2-SVP) = -1630.790621

E (SMD(Acetone)/M06/Def2-TZVPP//SMD(Acetone)/B3LYP-D3/Def2-SVP) = -1631.212952

|                                          |                             |
|------------------------------------------|-----------------------------|
| Zero-point correction=                   | 0.559179 (Hartree/Particle) |
| Thermal correction to Energy=            | 0.589016                    |
| Thermal correction to Enthalpy=          | 0.589960                    |
| Thermal correction to Gibbs Free Energy= | 0.498251                    |

Charge = 0 Multiplicity = 1

|   |             |             |             |
|---|-------------|-------------|-------------|
| C | -0.02936200 | 0.23579100  | 1.49755200  |
| C | -0.74561600 | 0.74508000  | 2.60007600  |
| H | -1.76612200 | 1.10465000  | 2.46710700  |
| C | -0.18875000 | 0.80789800  | 3.87895300  |
| H | -0.77703000 | 1.20990700  | 4.70829400  |
| C | 1.11765100  | 0.35903600  | 4.08686800  |
| H | 1.57018200  | 0.40563200  | 5.08110500  |
| C | 1.83920100  | -0.16083600 | 3.01246100  |
| H | 2.85771900  | -0.52590900 | 3.16740600  |
| C | 1.28732900  | -0.24026900 | 1.72129300  |
| C | 2.13335700  | -0.85663600 | 0.65513000  |
| C | 1.92628400  | -2.20255100 | 0.28270000  |
| C | 2.69958300  | -2.79167400 | -0.73569300 |
| H | 2.54046000  | -3.82820500 | -1.03077000 |
| C | 3.68358500  | -2.02523400 | -1.36671200 |
| H | 4.28476700  | -2.47821500 | -2.15990500 |
| C | 3.92475000  | -0.69915700 | -1.00202300 |
| H | 4.70452900  | -0.12973900 | -1.50641300 |
| C | 3.15177100  | -0.12016600 | 0.02113300  |
| C | 4.17558900  | 2.02963600  | -0.25421600 |
| H | 5.22958600  | 1.70889000  | -0.17656100 |
| C | 0.49472800  | -4.10709300 | 0.49726500  |
| H | 0.13455100  | -4.02614700 | -0.54407800 |
| C | -2.62871200 | -0.09357700 | 0.20311300  |
| H | -2.95530500 | 0.63180200  | 0.96552600  |
| C | -3.51987000 | 0.10255200  | -1.03624400 |
| H | -3.43457100 | 1.13416400  | -1.41474000 |
| H | -3.16089900 | -0.56193900 | -1.84383100 |
| C | -4.98951600 | -0.21563800 | -0.72615500 |
| H | -5.37366500 | 0.52161000  | 0.00307400  |
| H | -5.59689600 | -0.09967700 | -1.64019700 |
| C | -5.15375000 | -1.62616800 | -0.14924000 |
| H | -4.86814500 | -2.36671800 | -0.91942700 |
| H | -6.21155300 | -1.81987400 | 0.09846400  |
| C | -4.26877500 | -1.82360900 | 1.08656500  |
| H | -4.36087700 | -2.85564900 | 1.46653200  |
| H | -4.62012900 | -1.15708700 | 1.89605800  |
| C | -2.79854900 | -1.51135100 | 0.77968200  |
| H | -2.41279100 | -2.24179400 | 0.04447400  |
| H | -2.18714200 | -1.63017300 | 1.68890800  |
| C | -0.78473500 | 2.06644700  | -0.67238700 |
| H | -1.32672200 | 2.06933900  | -1.63512400 |
| C | -1.48476200 | 3.05444400  | 0.27431900  |
| H | -0.97882200 | 3.04298800  | 1.25422600  |
| H | -2.53109300 | 2.75701000  | 0.44924400  |

|    |             |             |             |
|----|-------------|-------------|-------------|
| C  | -1.43648800 | 4.48460500  | -0.28551800 |
| H  | -2.01451100 | 4.52562700  | -1.22735600 |
| H  | -1.92967800 | 5.17773000  | 0.41766100  |
| C  | 0.00413300  | 4.93215700  | -0.55658300 |
| H  | 0.55125400  | 4.98469700  | 0.40326300  |
| H  | 0.01833300  | 5.94931400  | -0.98460300 |
| C  | 0.72066100  | 3.94775500  | -1.48755200 |
| H  | 1.77270000  | 4.24918700  | -1.63155000 |
| H  | 0.24322700  | 3.97877900  | -2.48462600 |
| C  | 0.66248500  | 2.51372000  | -0.94639500 |
| H  | 1.24349000  | 2.44962200  | -0.01168500 |
| H  | 1.14353700  | 1.81832300  | -1.65455300 |
| O  | 3.30735600  | 1.15845600  | 0.44885600  |
| O  | 0.96636100  | -2.86051700 | 0.97629900  |
| P  | -0.82595600 | 0.24068500  | -0.19896800 |
| Pd | 0.01660800  | -1.10141800 | -1.75058800 |
| H  | 1.26846200  | -4.89303700 | 0.55569600  |
| H  | -0.34713500 | -4.39048700 | 1.14417800  |
| H  | 3.90212000  | 2.10816300  | -1.32071000 |
| H  | 4.07045900  | 3.01769300  | 0.21488000  |

I

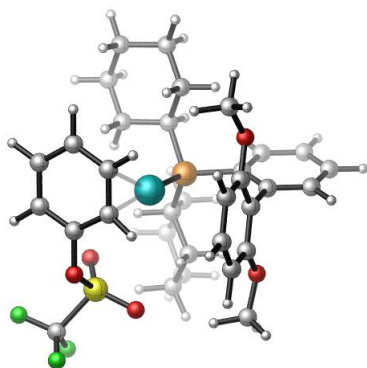

E (SMD(Acetone)/B3LYP-D3/Def2-SVP) = -2823.204623

E (SMD(Acetone)/M06/Def2-TZVPP//SMD(Acetone)/B3LYP-D3/Def2-SVP) = -2824.297547

|                                          |                             |
|------------------------------------------|-----------------------------|
| Zero-point correction=                   | 0.678754 (Hartree/Particle) |
| Thermal correction to Energy=            | 0.722747                    |
| Thermal correction to Enthalpy=          | 0.723692                    |
| Thermal correction to Gibbs Free Energy= | 0.598071                    |

Charge = 0 Multiplicity = 1

|   |             |             |             |
|---|-------------|-------------|-------------|
| C | -2.70291500 | -1.24072400 | 0.32837900  |
| C | -3.68919800 | -1.67351800 | 1.23729800  |
| H | -3.69720200 | -1.28536700 | 2.25661800  |
| C | -4.67280400 | -2.59382100 | 0.87023700  |
| H | -5.42326000 | -2.90923200 | 1.60015500  |
| C | -4.68798000 | -3.10663500 | -0.42981100 |
| H | -5.44892100 | -3.83147300 | -0.73163000 |
| C | -3.72911400 | -2.67692000 | -1.34749600 |
| H | -3.74463200 | -3.06217000 | -2.37030900 |

|    |             |             |             |
|----|-------------|-------------|-------------|
| C  | -2.73781900 | -1.74344100 | -0.99456300 |
| C  | -1.79706000 | -1.31044700 | -2.07386100 |
| C  | -2.06453100 | -0.13371700 | -2.80486400 |
| C  | -1.23236400 | 0.25501500  | -3.86949100 |
| H  | -1.43332300 | 1.16393100  | -4.43511300 |
| C  | -0.12232400 | -0.53308500 | -4.18169000 |
| H  | 0.53396500  | -0.22886200 | -5.00167900 |
| C  | 0.17420700  | -1.69644600 | -3.46818800 |
| H  | 1.05245100  | -2.28564900 | -3.72909900 |
| C  | -0.67561100 | -2.08984700 | -2.41859400 |
| C  | 0.71793200  | -3.94177800 | -1.80807900 |
| H  | 0.81184700  | -4.39604800 | -2.81054200 |
| C  | -3.38718800 | 1.85856400  | -2.92933500 |
| H  | -2.52899300 | 2.52870500  | -2.74952600 |
| C  | -2.30269700 | 1.13358900  | 1.98589300  |
| H  | -2.87963300 | 0.55978400  | 2.73004700  |
| C  | -1.32107900 | 2.04644300  | 2.74342500  |
| H  | -0.65647300 | 1.44870200  | 3.38799100  |
| H  | -0.67174700 | 2.55877900  | 2.00971600  |
| C  | -2.06200000 | 3.09301300  | 3.58715900  |
| H  | -2.62478500 | 2.58031200  | 4.38925200  |
| H  | -1.33212900 | 3.75272700  | 4.08709900  |
| C  | -3.03560700 | 3.91760100  | 2.73775500  |
| H  | -2.46018800 | 4.50913100  | 2.00131800  |
| H  | -3.57971600 | 4.64099600  | 3.36902200  |
| C  | -4.01992700 | 3.01043300  | 1.99087700  |
| H  | -4.68868500 | 3.61089600  | 1.35036400  |
| H  | -4.66603500 | 2.49291500  | 2.72415100  |
| C  | -3.28414900 | 1.96732800  | 1.14072000  |
| H  | -2.71563300 | 2.48000100  | 0.34293300  |
| H  | -4.00683100 | 1.30744900  | 0.63385100  |
| C  | -0.33818800 | -1.10441900 | 2.06243500  |
| H  | 0.45491600  | -0.39312100 | 2.34863500  |
| C  | -0.99142000 | -1.63660500 | 3.34592900  |
| H  | -1.78677400 | -2.35569900 | 3.08622900  |
| H  | -1.46700000 | -0.82267600 | 3.91646200  |
| C  | 0.05403300  | -2.34653300 | 4.22220700  |
| H  | 0.80553800  | -1.60658000 | 4.55474900  |
| H  | -0.42549700 | -2.74057600 | 5.13495100  |
| C  | 0.76045200  | -3.47605700 | 3.46155700  |
| H  | 0.02288900  | -4.26719700 | 3.23001000  |
| H  | 1.53272900  | -3.94189300 | 4.09791600  |
| C  | 1.37516200  | -2.97056000 | 2.15088800  |
| H  | 1.81698100  | -3.80807500 | 1.58358400  |
| H  | 2.20123800  | -2.27092500 | 2.37098900  |
| C  | 0.33411800  | -2.24993600 | 1.28702700  |
| H  | -0.43579000 | -2.96827900 | 0.95844200  |
| H  | 0.80292100  | -1.86576900 | 0.37166600  |
| O  | -0.48750200 | -3.20735700 | -1.67472700 |
| O  | -3.15396100 | 0.56482800  | -2.40233700 |
| P  | -1.37519300 | -0.06721900 | 0.89007000  |
| Pd | -0.02973400 | 1.01383800  | -0.64545400 |
| C  | 2.59337000  | 2.04819300  | -0.95408700 |
| C  | 1.53602000  | 1.93187700  | -1.88944500 |

|   |             |             |             |
|---|-------------|-------------|-------------|
| C | 2.74548200  | 3.13851100  | -0.11058100 |
| C | 0.55995500  | 2.96036900  | -1.89179900 |
| H | 1.59586900  | 1.18723400  | -2.68871600 |
| C | 1.78482000  | 4.16489900  | -0.15659400 |
| H | 3.59320900  | 3.17071800  | 0.57610100  |
| C | 0.69192300  | 4.06540100  | -1.01680400 |
| H | -0.20528200 | 2.97505700  | -2.67076700 |
| H | 1.89105100  | 5.03113400  | 0.50066900  |
| H | -0.05974700 | 4.85811400  | -1.04274300 |
| O | 3.56996800  | 1.03366500  | -0.94159700 |
| S | 3.36080300  | -0.24043200 | 0.07393800  |
| O | 2.97987100  | -1.41853900 | -0.68984400 |
| O | 2.67742400  | 0.16427800  | 1.29296500  |
| H | -3.60574800 | 1.83045600  | -4.01162200 |
| H | -4.26542100 | 2.25524300  | -2.40142000 |
| H | 1.60083800  | -3.31196500 | -1.60910700 |
| H | 0.67409200  | -4.74582500 | -1.06059100 |
| C | 5.18015900  | -0.41826700 | 0.49765300  |
| F | 5.60827600  | 0.69613300  | 1.07026300  |
| F | 5.87983400  | -0.66460000 | -0.59765100 |
| F | 5.29337200  | -1.43288000 | 1.34473800  |

## TS1

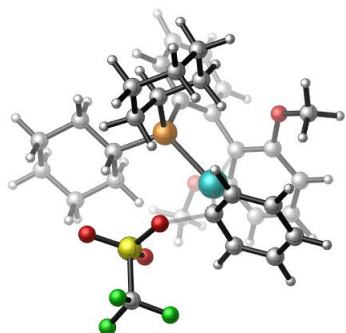

E (SMD(Acetone)/B3LYP-D3/Def2-SVP) = -2823.187944

E (SMD(Acetone)/M06/Def2-TZVPP//SMD(Acetone)/B3LYP-D3/Def2-SVP) = -2824.275696

|                                          |                             |
|------------------------------------------|-----------------------------|
| Zero-point correction=                   | 0.676778 (Hartree/Particle) |
| Thermal correction to Energy=            | 0.720457                    |
| Thermal correction to Enthalpy=          | 0.721401                    |
| Thermal correction to Gibbs Free Energy= | 0.597338                    |

Charge = 0 Multiplicity = 1

|   |            |            |             |
|---|------------|------------|-------------|
| C | 2.77874300 | 0.96125700 | 0.24897200  |
| C | 3.65644800 | 1.90349600 | 0.81701700  |
| H | 3.28323600 | 2.62710200 | 1.54365600  |
| C | 5.00887000 | 1.92676200 | 0.47223300  |
| H | 5.67413800 | 2.66721100 | 0.92409200  |
| C | 5.50419600 | 1.00003800 | -0.45082500 |
| H | 6.56105700 | 1.01033500 | -0.73035100 |
| C | 4.64644600 | 0.05062900 | -1.00785100 |

|    |             |             |             |
|----|-------------|-------------|-------------|
| H  | 5.03434600  | -0.68397600 | -1.71815100 |
| C  | 3.28367000  | 0.01103500  | -0.66496500 |
| C  | 2.45782800  | -1.08194800 | -1.28414800 |
| C  | 2.39261900  | -2.36038000 | -0.66437200 |
| C  | 1.87253600  | -3.47205900 | -1.35983600 |
| H  | 1.81845900  | -4.44914500 | -0.88204600 |
| C  | 1.42503400  | -3.30375200 | -2.66970700 |
| H  | 1.02023300  | -4.16491200 | -3.20770900 |
| C  | 1.45673500  | -2.05892300 | -3.30569300 |
| H  | 1.08865600  | -1.95812400 | -4.32583600 |
| C  | 1.98646300  | -0.95245300 | -2.61972200 |
| C  | 1.46935700  | 0.57768100  | -4.38509700 |
| H  | 1.91372900  | 0.01160800  | -5.22184300 |
| C  | 2.54573500  | -3.52427900 | 1.41716400  |
| H  | 1.44941400  | -3.63933300 | 1.47297300  |
| C  | 0.94105800  | 1.10232300  | 2.52181600  |
| H  | 1.59899200  | 1.94585800  | 2.79275200  |
| C  | -0.47972400 | 1.41655400  | 3.02713400  |
| H  | -0.82781900 | 2.37890600  | 2.62018200  |
| H  | -1.18198700 | 0.65475400  | 2.65262100  |
| C  | -0.53030800 | 1.45876800  | 4.56051400  |
| H  | 0.07096000  | 2.31469900  | 4.91932300  |
| H  | -1.56696200 | 1.64143700  | 4.89124900  |
| C  | 0.01348900  | 0.16928300  | 5.18503300  |
| H  | -0.64257600 | -0.67527400 | 4.90266800  |
| H  | -0.01198600 | 0.23484800  | 6.28615400  |
| C  | 1.43780200  | -0.11814500 | 4.69754600  |
| H  | 1.81001700  | -1.06532900 | 5.12406900  |
| H  | 2.11388500  | 0.67885900  | 5.05869300  |
| C  | 1.50006500  | -0.18104000 | 3.16691200  |
| H  | 0.90891700  | -1.04382700 | 2.81371300  |
| H  | 2.53495800  | -0.35427300 | 2.83039200  |
| C  | 0.25681000  | 2.50368300  | -0.02032100 |
| H  | -0.79933500 | 2.42177500  | 0.28529400  |
| C  | 0.80791200  | 3.82952900  | 0.52817100  |
| H  | 1.86395600  | 3.93864200  | 0.22858200  |
| H  | 0.78168600  | 3.84458500  | 1.62937400  |
| C  | 0.00553900  | 5.01434300  | -0.03220800 |
| H  | -1.03361800 | 4.95220400  | 0.33916400  |
| H  | 0.42200100  | 5.96214800  | 0.35012900  |
| C  | -0.00398400 | 5.01468700  | -1.56581700 |
| H  | 1.02450200  | 5.19436000  | -1.93125500 |
| H  | -0.62299400 | 5.84636700  | -1.94421400 |
| C  | -0.50543500 | 3.67669500  | -2.12185800 |
| H  | -0.45268600 | 3.67425900  | -3.22438200 |
| H  | -1.56717600 | 3.53648500  | -1.85212500 |
| C  | 0.29361300  | 2.49503900  | -1.55919300 |
| H  | 1.34190200  | 2.54941100  | -1.89949100 |
| H  | -0.11720900 | 1.55000600  | -1.94110900 |
| O  | 2.10818600  | 0.28011700  | -3.15275400 |
| O  | 2.90221900  | -2.42827700 | 0.58578900  |
| P  | 0.98349500  | 0.93242000  | 0.66806900  |
| Pd | 0.06442300  | -1.00133300 | -0.22259500 |
| C  | -1.66534200 | -1.55524200 | 0.53049800  |



|   |             |             |             |
|---|-------------|-------------|-------------|
| C | -1.86545200 | -2.30534500 | -0.66112700 |
| C | -1.68438600 | -2.18541500 | 1.80260700  |
| C | -1.97855300 | -3.71500900 | -0.55571000 |
| H | -2.07449300 | -1.80553200 | -1.60800600 |
| C | -1.77817900 | -3.56814600 | 1.85649800  |
| H | -1.58560300 | -1.58706200 | 2.70896700  |
| C | -1.92142200 | -4.34309200 | 0.68060500  |
| H | -2.13770800 | -4.29824900 | -1.46713100 |
| H | -1.73190600 | -4.06417400 | 2.83046300  |
| H | -2.00763100 | -5.42995300 | 0.75340600  |
| O | -2.71361500 | -0.06219200 | 0.75416800  |
| S | -3.12888900 | 0.86083500  | -0.40447900 |
| O | -2.41927800 | 0.60545500  | -1.66389500 |
| O | -3.29061400 | 2.24653200  | 0.04834800  |
| H | 2.99662000  | -4.46867000 | 1.06740600  |
| H | 2.93659100  | -3.29426300 | 2.41746800  |
| H | 0.38702300  | 0.36830000  | -4.33844500 |
| H | 1.62124100  | 1.65099900  | -4.56051500 |
| C | -4.87128400 | 0.24966700  | -0.72045800 |
| F | -5.63056000 | 0.42524700  | 0.35930600  |
| F | -4.85024100 | -1.04933200 | -1.02575900 |
| F | -5.40642700 | 0.92164600  | -1.73980100 |

## II

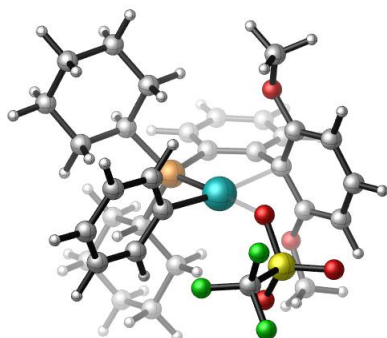

E (SMD(Acetone)/B3LYP-D3/Def2-SVP) = -2823.254646

E (SMD(Acetone)/M06/Def2-TZVPP//SMD(Acetone)/B3LYP-D3/Def2-SVP) = -2824.338853

|                                          |                             |
|------------------------------------------|-----------------------------|
| Zero-point correction=                   | 0.679754 (Hartree/Particle) |
| Thermal correction to Energy=            | 0.722622                    |
| Thermal correction to Enthalpy=          | 0.723566                    |
| Thermal correction to Gibbs Free Energy= | 0.603594                    |

Charge = 0 Multiplicity = 1

|   |             |             |             |
|---|-------------|-------------|-------------|
| C | -2.65183900 | -1.26310400 | -0.10959300 |
| C | -4.05211000 | -1.34043400 | 0.01615600  |
| H | -4.63730300 | -0.44537600 | 0.23051200  |
| C | -4.71458800 | -2.55918300 | -0.13297800 |
| H | -5.80179400 | -2.60278700 | -0.03004000 |
| C | -3.98244800 | -3.71840100 | -0.41136300 |
| H | -4.49239200 | -4.67870000 | -0.52433300 |

|    |             |             |             |
|----|-------------|-------------|-------------|
| C  | -2.59793800 | -3.64396900 | -0.56300100 |
| H  | -2.02508800 | -4.54241800 | -0.80596600 |
| C  | -1.91835100 | -2.42094100 | -0.42562800 |
| C  | -0.44195900 | -2.43073900 | -0.70413700 |
| C  | -0.00856200 | -2.31934600 | -2.06039000 |
| C  | 1.27701100  | -2.73323800 | -2.43777300 |
| H  | 1.61698400  | -2.63399900 | -3.46738900 |
| C  | 2.12552300  | -3.26581100 | -1.46715600 |
| H  | 3.13578900  | -3.56453700 | -1.75290100 |
| C  | 1.74613600  | -3.38696500 | -0.13030300 |
| H  | 2.45533700  | -3.76716800 | 0.60140900  |
| C  | 0.46064400  | -2.97924200 | 0.25373900  |
| C  | 0.87649500  | -3.35271000 | 2.57631900  |
| H  | 1.27422200  | -4.38066600 | 2.52144800  |
| C  | -0.52178100 | -1.41209100 | -4.21253600 |
| H  | 0.28998900  | -0.66724800 | -4.14977100 |
| C  | -2.66628500 | 1.55369700  | -0.86990800 |
| H  | -3.73297700 | 1.33312400  | -0.69425700 |
| C  | -2.42256100 | 3.02147400  | -0.47465900 |
| H  | -2.70267100 | 3.19045500  | 0.57656400  |
| H  | -1.35212900 | 3.25763800  | -0.56317400 |
| C  | -3.22185300 | 3.96502300  | -1.38474900 |
| H  | -4.30310700 | 3.80477600  | -1.21746800 |
| H  | -3.01004000 | 5.01110200  | -1.10585900 |
| C  | -2.90021800 | 3.72937400  | -2.86505200 |
| H  | -1.83819500 | 3.97767200  | -3.04716400 |
| H  | -3.49784700 | 4.40523400  | -3.50010300 |
| C  | -3.14881400 | 2.26868300  | -3.25730300 |
| H  | -2.87634800 | 2.09824700  | -4.31274800 |
| H  | -4.22820300 | 2.04615900  | -3.16881200 |
| C  | -2.36092200 | 1.30651100  | -2.36065100 |
| H  | -1.27985600 | 1.44926500  | -2.53021300 |
| H  | -2.58182400 | 0.26058700  | -2.62556800 |
| C  | -1.97172900 | 0.75749000  | 1.94953600  |
| H  | -1.48594900 | 1.74524800  | 2.01362600  |
| C  | -3.42416400 | 0.91346400  | 2.43056900  |
| H  | -3.93610700 | -0.06071100 | 2.37251000  |
| H  | -3.98068200 | 1.61189300  | 1.78568400  |
| C  | -3.45359400 | 1.39523000  | 3.88857200  |
| H  | -3.00565400 | 2.40420100  | 3.94714800  |
| H  | -4.49947500 | 1.49251900  | 4.22586500  |
| C  | -2.68148900 | 0.44040200  | 4.80664200  |
| H  | -3.19677500 | -0.53797500 | 4.82201200  |
| H  | -2.68628500 | 0.81654900  | 5.84382400  |
| C  | -1.24211600 | 0.24092100  | 4.31830600  |
| H  | -0.71606400 | -0.49160300 | 4.95376800  |
| H  | -0.69079500 | 1.19464700  | 4.41228200  |
| C  | -1.19452500 | -0.21682700 | 2.85530100  |
| H  | -1.63153400 | -1.22570900 | 2.76186900  |
| H  | -0.15031600 | -0.30350800 | 2.51580400  |
| O  | -0.02395900 | -3.08570800 | 1.50491100  |
| O  | -0.92953600 | -1.83390300 | -2.91761500 |
| P  | -1.74277000 | 0.31070300  | 0.15898400  |
| Pd | 0.43404800  | -0.07997100 | -0.32491400 |

|   |             |             |             |
|---|-------------|-------------|-------------|
| C | 0.82987900  | 1.85922900  | -0.08045800 |
| C | 1.13704200  | 2.60300300  | -1.23087300 |
| C | 0.93137300  | 2.46936200  | 1.17608100  |
| C | 1.52794500  | 3.94372600  | -1.12250700 |
| H | 1.07332700  | 2.14566000  | -2.22177300 |
| C | 1.31878800  | 3.81243700  | 1.28145200  |
| H | 0.72591600  | 1.90398900  | 2.08706500  |
| C | 1.61190000  | 4.55578800  | 0.13390200  |
| H | 1.76361500  | 4.51220300  | -2.02721200 |
| H | 1.39448600  | 4.27528400  | 2.26999600  |
| H | 1.91087800  | 5.60429500  | 0.21712300  |
| O | 2.54806700  | -0.34787900 | -0.75865400 |
| S | 3.58204800  | -0.64526200 | 0.30991600  |
| O | 4.53630900  | -1.69357400 | -0.07671600 |
| O | 3.03308100  | -0.69330300 | 1.67764400  |
| H | -0.19216400 | -2.26175200 | -4.83413000 |
| H | -1.40218400 | -0.94964300 | -4.67814800 |
| H | 1.70915800  | -2.63076200 | 2.57740300  |
| H | 0.29297900  | -3.24587200 | 3.50059300  |
| C | 4.63319800  | 0.90833200  | 0.27524000  |
| F | 3.95471600  | 1.97500400  | 0.69942200  |
| F | 5.06569900  | 1.14941800  | -0.96618900 |
| F | 5.69663500  | 0.74447600  | 1.06919100  |

### III

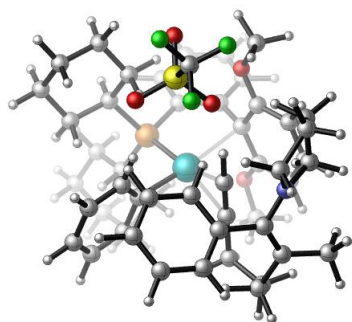

E (SMD(Acetone)/B3LYP-D3/Def2-SVP) = -3577.231572

E (SMD(Acetone)/M06/Def2-TZVPP//SMD(Acetone)/B3LYP-D3/Def2-SVP) = -3578.482956

|                                          |                             |
|------------------------------------------|-----------------------------|
| Zero-point correction=                   | 1.048520 (Hartree/Particle) |
| Thermal correction to Energy=            | 1.111862                    |
| Thermal correction to Enthalpy=          | 1.112806                    |
| Thermal correction to Gibbs Free Energy= | 0.948536                    |

Charge = 0 Multiplicity = 1

|   |             |            |             |
|---|-------------|------------|-------------|
| C | -3.76530000 | 0.75726100 | -1.44998200 |
| C | -4.93026000 | 1.52566300 | -1.64429500 |
| H | -5.41396500 | 2.01415100 | -0.79791600 |
| C | -5.47620300 | 1.68956900 | -2.91701600 |
| H | -6.38128000 | 2.28812700 | -3.04762800 |
| C | -4.85711400 | 1.08970900 | -4.01873600 |

|   |             |             |             |
|---|-------------|-------------|-------------|
| H | -5.27684900 | 1.20950900  | -5.02097000 |
| C | -3.68993000 | 0.34913700  | -3.83771200 |
| H | -3.19098600 | -0.10139900 | -4.69930500 |
| C | -3.12442000 | 0.17762300  | -2.56077400 |
| C | -1.83518100 | -0.59417100 | -2.50383300 |
| C | -0.65164200 | 0.03639300  | -2.99497000 |
| C | 0.46444100  | -0.72985000 | -3.36451100 |
| H | 1.37667000  | -0.25235600 | -3.71663200 |
| C | 0.39477600  | -2.12078500 | -3.26729500 |
| H | 1.26894100  | -2.71311700 | -3.54992800 |
| C | -0.74343300 | -2.77951000 | -2.80052400 |
| H | -0.75677900 | -3.86596400 | -2.73139000 |
| C | -1.86520900 | -2.01706400 | -2.43391900 |
| C | -3.15548900 | -3.94151700 | -1.82207400 |
| H | -2.99960900 | -4.51482500 | -2.75174600 |
| C | 0.38736400  | 2.10292000  | -3.62852000 |
| H | 1.27401900  | 1.98794300  | -2.99080500 |
| C | -2.88289600 | 2.27498800  | 0.86243900  |
| H | -3.81250600 | 2.78689300  | 0.55914900  |
| C | -2.75415400 | 2.39300700  | 2.39129300  |
| H | -3.63908700 | 1.96740400  | 2.88959900  |
| H | -1.88405400 | 1.81505900  | 2.73417900  |
| C | -2.57537400 | 3.86008500  | 2.80947800  |
| H | -3.49820700 | 4.42134500  | 2.57129100  |
| H | -2.44648200 | 3.91486100  | 3.90401000  |
| C | -1.38827200 | 4.51562600  | 2.09406700  |
| H | -0.45068300 | 4.01391000  | 2.39365900  |
| H | -1.29642700 | 5.57278100  | 2.39775700  |
| C | -1.52772800 | 4.40579600  | 0.57216300  |
| H | -0.63701000 | 4.81606300  | 0.07285200  |
| H | -2.40284200 | 4.99326800  | 0.23642000  |
| C | -1.69647400 | 2.94529900  | 0.14150900  |
| H | -0.77189500 | 2.39863200  | 0.38748200  |
| H | -1.81700500 | 2.87244400  | -0.95136600 |
| C | -4.32774300 | -0.34430800 | 1.27136700  |
| H | -3.83755600 | -0.35865200 | 2.25978500  |
| C | -5.69335800 | 0.34577700  | 1.43054100  |
| H | -6.21133500 | 0.36182100  | 0.45796600  |
| H | -5.57348100 | 1.39221200  | 1.75187500  |
| C | -6.56207600 | -0.42530600 | 2.43543900  |
| H | -6.08303900 | -0.38958200 | 3.43103800  |
| H | -7.54193300 | 0.07121800  | 2.53695600  |
| C | -6.74460900 | -1.88674800 | 2.00896200  |
| H | -7.32039600 | -1.91593000 | 1.06534000  |
| H | -7.33948500 | -2.43465300 | 2.75937500  |
| C | -5.39344100 | -2.57819100 | 1.79162000  |
| H | -5.54182200 | -3.60847900 | 1.42589800  |
| H | -4.86509900 | -2.65823300 | 2.75949700  |
| C | -4.50919700 | -1.80183800 | 0.80772100  |
| H | -4.96884200 | -1.80703700 | -0.19528100 |
| H | -3.53204400 | -2.29719100 | 0.69721500  |
| O | -3.04395900 | -2.54327400 | -2.04626500 |
| O | -0.72080700 | 1.37368000  | -3.10390400 |
| P | -3.06085900 | 0.53223700  | 0.23323300  |

|    |             |             |             |
|----|-------------|-------------|-------------|
| C  | -0.82697300 | -0.56983900 | 2.01547500  |
| C  | 0.12239700  | 0.31233700  | 2.55166500  |
| C  | -1.48943400 | -1.47223300 | 2.85984200  |
| C  | 0.38445100  | 0.30278200  | 3.92809800  |
| H  | 0.66433100  | 1.01624200  | 1.91716700  |
| C  | -1.21846900 | -1.47764200 | 4.23639400  |
| H  | -2.21940100 | -2.17965400 | 2.46123100  |
| C  | -0.28601100 | -0.58608500 | 4.77579900  |
| H  | 1.12473200  | 0.99718300  | 4.33438300  |
| H  | -1.74360300 | -2.18563600 | 4.88450900  |
| H  | -0.07785100 | -0.58821600 | 5.84922300  |
| H  | -2.43917700 | -4.28575900 | -1.05717300 |
| H  | -4.17776500 | -4.11439500 | -1.46122000 |
| H  | 0.08326700  | 3.15698100  | -3.62333200 |
| H  | 0.60885500  | 1.79034600  | -4.66353500 |
| S  | 2.10377900  | 2.89917200  | -0.21866200 |
| O  | 2.12605500  | 1.55640500  | -0.86827600 |
| O  | 1.83669000  | 2.88138900  | 1.23728400  |
| O  | 1.41664600  | 3.94515300  | -0.99949500 |
| Pd | -1.08626500 | -0.64325300 | 0.03152600  |
| C  | 1.13131400  | -1.14496300 | -0.27555400 |
| C  | 0.75744500  | -2.25344000 | 0.09302300  |
| H  | 1.58232700  | -0.20178600 | -0.57104300 |
| C  | 0.47744000  | -3.59395800 | 0.60547600  |
| C  | 1.58564800  | -4.63109500 | 0.33414500  |
| H  | -0.47340900 | -3.95070700 | 0.17700200  |
| H  | 0.31326300  | -3.49989400 | 1.69322400  |
| C  | 2.99355300  | -4.24027000 | 0.84599700  |
| H  | 1.26461400  | -5.55885200 | 0.83484100  |
| H  | 1.61497900  | -4.85848200 | -0.74333400 |
| C  | 3.83369300  | -3.45114300 | -0.14145500 |
| H  | 2.88127500  | -3.70900000 | 1.80176300  |
| H  | 3.52865600  | -5.18052000 | 1.07606000  |
| C  | 4.32940900  | -2.19665400 | 0.08650700  |
| C  | 4.07950800  | -4.15169600 | -1.45813900 |
| C  | 4.29601300  | -1.54066000 | 1.43311300  |
| H  | 4.09042600  | -5.24529300 | -1.31267500 |
| H  | 3.30933500  | -3.94564300 | -2.22374500 |
| H  | 5.04798900  | -3.85757300 | -1.88971400 |
| C  | 3.78169000  | -0.23798700 | 1.57073500  |
| C  | 4.80561800  | -2.17625300 | 2.57978600  |
| C  | 3.75455500  | 0.40093300  | 2.81110000  |
| H  | 3.40159100  | 0.28575300  | 0.69543200  |
| C  | 4.77592600  | -1.54161700 | 3.82666100  |
| H  | 5.23702200  | -3.17638000 | 2.48833900  |
| C  | 4.24837900  | -0.25075900 | 3.94780600  |
| H  | 3.33812900  | 1.40911000  | 2.87343900  |
| H  | 5.17539400  | -2.05512900 | 4.70590300  |
| H  | 4.22692200  | 0.24613100  | 4.92176000  |
| N  | 4.85401300  | -1.41359000 | -0.94914300 |
| C  | 5.96619800  | -0.47366100 | -0.76632500 |
| C  | 4.20378100  | -1.22832600 | -2.25011900 |
| H  | 5.75897400  | 0.25447500  | 0.03588900  |
| H  | 6.89921300  | -0.99902600 | -0.49300800 |

|   |            |             |             |
|---|------------|-------------|-------------|
| C | 6.07734200 | 0.24461400  | -2.11998600 |
| H | 4.53180500 | -1.97023600 | -3.00399600 |
| H | 3.11324000 | -1.32911300 | -2.15192500 |
| C | 4.64787300 | 0.17285800  | -2.67328500 |
| H | 6.44759200 | 1.27544000  | -2.01160700 |
| H | 6.76949300 | -0.29681600 | -2.78704200 |
| H | 4.59537700 | 0.32282000  | -3.76327000 |
| H | 4.01079000 | 0.92600800  | -2.18826600 |
| C | 3.90594100 | 3.41228000  | -0.32039000 |
| F | 4.07326500 | 4.64137300  | 0.17789900  |
| F | 4.32526800 | 3.41626700  | -1.59352400 |
| F | 4.69058000 | 2.57264000  | 0.36925600  |

#### IV

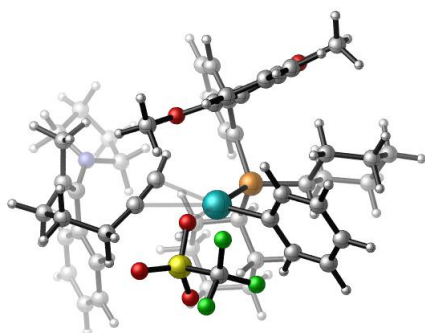

E (SMD(Acetone)/B3LYP-D3/Def2-SVP) = -3577.208171

E (SMD(Acetone)/M06/Def2-TZVPP//SMD(Acetone)/B3LYP-D3/Def2-SVP) = -3578.461176

|                                          |                             |
|------------------------------------------|-----------------------------|
| Zero-point correction=                   | 1.048190 (Hartree/Particle) |
| Thermal correction to Energy=            | 1.111623                    |
| Thermal correction to Enthalpy=          | 1.112567                    |
| Thermal correction to Gibbs Free Energy= | 0.946837                    |

Charge = 0 Multiplicity = 1

|   |             |             |             |
|---|-------------|-------------|-------------|
| C | 0.08815200  | -2.56549700 | -0.19595100 |
| C | -0.99431500 | -3.35584700 | 0.24395400  |
| H | -1.34957100 | -3.27677400 | 1.26981600  |
| C | -1.65198200 | -4.25257900 | -0.59939900 |
| H | -2.49014100 | -4.83945600 | -0.21620800 |
| C | -1.23792200 | -4.37958600 | -1.92509300 |
| H | -1.75202000 | -5.06109300 | -2.60774300 |
| C | -0.13963100 | -3.64266100 | -2.36719300 |
| H | 0.21675100  | -3.76888800 | -3.39230200 |
| C | 0.55212000  | -2.74577100 | -1.53261500 |
| C | 1.78954700  | -2.14436100 | -2.13668500 |
| C | 1.76984200  | -0.94140500 | -2.87579700 |
| C | 2.94541400  | -0.43759400 | -3.46237300 |
| H | 2.94090200  | 0.51544100  | -3.98830500 |
| C | 4.12500300  | -1.17525200 | -3.36838100 |
| H | 5.04073300  | -0.77873200 | -3.81495300 |
| C | 4.15448600  | -2.41891200 | -2.73687400 |
| H | 5.07736500  | -2.99643000 | -2.71218800 |

|   |             |             |             |
|---|-------------|-------------|-------------|
| C | 2.97514900  | -2.91495900 | -2.15674700 |
| C | 4.03729100  | -4.96994500 | -1.51209300 |
| H | 4.43084000  | -5.22714300 | -2.51079300 |
| C | 0.46279100  | 0.87892100  | -3.72570700 |
| H | 1.02160200  | 1.68449800  | -3.22340100 |
| C | -0.55738200 | -1.11631600 | 2.35014900  |
| H | -0.67750000 | -2.13167900 | 2.75791800  |
| C | -0.04023400 | -0.21514800 | 3.49193700  |
| H | 0.95028900  | -0.53634500 | 3.84477800  |
| H | 0.07356600  | 0.81269100  | 3.10482500  |
| C | -1.01986500 | -0.21912000 | 4.67506300  |
| H | -1.03967800 | -1.23297400 | 5.11541500  |
| H | -0.64739500 | 0.45860400  | 5.46190400  |
| C | -2.43871400 | 0.17522400  | 4.25282300  |
| H | -2.44281300 | 1.23479500  | 3.93834900  |
| H | -3.13076300 | 0.09808500  | 5.10873900  |
| C | -2.92701600 | -0.68514400 | 3.08382100  |
| H | -3.92227000 | -0.35216500 | 2.75293500  |
| H | -3.03444200 | -1.73524400 | 3.41341100  |
| C | -1.94373600 | -0.62072600 | 1.90833800  |
| H | -1.86118400 | 0.41964200  | 1.56199500  |
| H | -2.32989300 | -1.20022100 | 1.06018700  |
| C | 2.15984600  | -2.07114400 | 1.92566200  |
| H | 2.49228300  | -1.26327500 | 2.59475800  |
| C | 1.75523500  | -3.28428300 | 2.78639000  |
| H | 1.37800100  | -4.08723400 | 2.12831400  |
| H | 0.94356600  | -3.03191500 | 3.48339300  |
| C | 2.95510200  | -3.80004300 | 3.59775700  |
| H | 3.24254100  | -3.02569900 | 4.33267700  |
| H | 2.65004100  | -4.68723000 | 4.17855000  |
| C | 4.16413300  | -4.12477800 | 2.71478900  |
| H | 3.91578600  | -4.97905300 | 2.05755000  |
| H | 5.01871400  | -4.44079900 | 3.33726900  |
| C | 4.53962300  | -2.92311800 | 1.84308100  |
| H | 5.37254300  | -3.17927000 | 1.16631400  |
| H | 4.89518900  | -2.09433000 | 2.48220200  |
| C | 3.33535900  | -2.45291900 | 1.01982900  |
| H | 3.00821800  | -3.27638800 | 0.37509000  |
| H | 3.61841200  | -1.61943900 | 0.36705400  |
| O | 2.88304900  | -4.14939200 | -1.60107400 |
| O | 0.56433800  | -0.34573100 | -3.01181700 |
| P | 0.73585000  | -1.28000200 | 0.99579000  |
| C | 2.85291300  | 0.89602600  | 0.74024700  |
| C | 3.13103500  | 1.15778800  | 2.08836200  |
| C | 3.90979900  | 0.83999100  | -0.17954700 |
| C | 4.45370300  | 1.34987200  | 2.51169600  |
| H | 2.32531300  | 1.21682500  | 2.82148500  |
| C | 5.22970500  | 1.03091300  | 0.24670800  |
| H | 3.71228300  | 0.63858300  | -1.23323000 |
| C | 5.50767400  | 1.28055900  | 1.59528200  |
| H | 4.65592100  | 1.55523900  | 3.56727400  |
| H | 6.04327300  | 0.97915900  | -0.48319900 |
| H | 6.53900500  | 1.42524100  | 1.92897200  |
| H | 0.81351000  | 0.76641600  | -4.76586000 |

|    |             |             |             |
|----|-------------|-------------|-------------|
| H  | -0.60251900 | 1.13980200  | -3.73380900 |
| H  | 3.72065100  | -5.89131100 | -1.00440800 |
| H  | 4.83613700  | -4.49058900 | -0.92087900 |
| S  | 1.41544300  | 4.05870900  | -0.30368100 |
| O  | 1.40950100  | 2.69345300  | -0.96361200 |
| O  | 0.95236900  | 4.04835500  | 1.09320600  |
| O  | 0.88077600  | 5.10175100  | -1.19521800 |
| Pd | 0.99622100  | 0.79032400  | 0.01884100  |
| C  | -1.22841700 | 0.39605400  | -1.01927700 |
| C  | -1.46545000 | 1.59296000  | -1.01301700 |
| H  | -1.27394700 | -0.66704700 | -1.16799500 |
| C  | -1.84351300 | 2.99809200  | -1.11295600 |
| C  | -2.92469300 | 3.25946500  | -2.18629000 |
| H  | -0.95663900 | 3.58601600  | -1.38410300 |
| H  | -2.17476900 | 3.36977800  | -0.12883900 |
| C  | -4.31360000 | 2.63129700  | -1.95557400 |
| H  | -3.05120400 | 4.35277500  | -2.24608000 |
| H  | -2.52355700 | 2.94688700  | -3.16376500 |
| C  | -4.37858500 | 1.11676100  | -1.93557400 |
| H  | -4.75687700 | 3.05868100  | -1.04596200 |
| H  | -4.94886900 | 2.97750400  | -2.79461900 |
| C  | -4.91440600 | 0.38083300  | -0.91743500 |
| C  | -3.90189100 | 0.44034200  | -3.19580100 |
| C  | -5.34142300 | 0.95321600  | 0.39958400  |
| N  | -5.16076000 | -0.99833100 | -1.08879400 |
| H  | -3.01498500 | 0.94471500  | -3.60803400 |
| H  | -3.64237100 | -0.61219100 | -3.01306600 |
| H  | -4.67137400 | 0.46519900  | -3.99024700 |
| C  | -4.52337200 | 1.80639400  | 1.16161900  |
| C  | -6.59161000 | 0.58748700  | 0.94003200  |
| C  | -4.85936800 | -1.98967100 | -0.05105400 |
| C  | -6.15873300 | -1.50065700 | -2.03710800 |
| C  | -4.94874700 | 2.30848100  | 2.39533000  |
| H  | -3.52920000 | 2.05658900  | 0.79744100  |
| C  | -7.01698700 | 1.08008700  | 2.17570600  |
| H  | -7.23512400 | -0.09418800 | 0.37896200  |
| H  | -3.83718100 | -2.39384400 | -0.18254200 |
| H  | -4.90262100 | -1.55600300 | 0.96032400  |
| H  | -7.15540500 | -1.05041100 | -1.84839600 |
| H  | -5.89850000 | -1.27473800 | -3.08409100 |
| C  | -6.19875400 | 1.94942200  | 2.90878700  |
| H  | -4.28882900 | 2.96726900  | 2.96618000  |
| H  | -7.99390500 | 0.78532100  | 2.56928400  |
| H  | -6.52997100 | 2.33405900  | 3.87714300  |
| C  | -5.90654200 | -3.08797500 | -0.26041200 |
| H  | -5.55909300 | -4.07844300 | 0.07177800  |
| H  | -6.82431900 | -2.84431900 | 0.30177000  |
| C  | -6.18271500 | -3.00813300 | -1.76717000 |
| H  | -7.13232900 | -3.47623200 | -2.06838100 |
| H  | -5.36800400 | -3.50135000 | -2.32500200 |
| C  | 3.24585900  | 4.49540600  | -0.20850600 |
| F  | 3.82909400  | 3.93472700  | 0.84711500  |
| F  | 3.88398500  | 4.09865900  | -1.31299100 |
| F  | 3.37234400  | 5.82182800  | -0.10129400 |



TS2

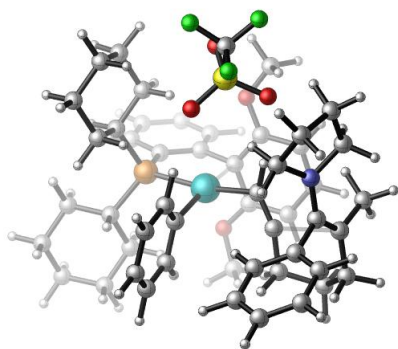

E (SMD(Acetone)/B3LYP-D3/Def2-SVP) = -3577.215942

E (SMD(Acetone)/M06/Def2-TZVPP//SMD(Acetone)/B3LYP-D3/Def2-SVP) = -3578.46362

|                                          |                             |
|------------------------------------------|-----------------------------|
| Zero-point correction=                   | 1.047331 (Hartree/Particle) |
| Thermal correction to Energy=            | 1.110289                    |
| Thermal correction to Enthalpy=          | 1.111233                    |
| Thermal correction to Gibbs Free Energy= | 0.946693                    |

Charge = 0 Multiplicity = 1

|   |             |             |             |
|---|-------------|-------------|-------------|
| C | 4.04220400  | 0.44877600  | 0.83458000  |
| C | 5.35630600  | 0.91491300  | 0.63887300  |
| H | 5.74471500  | 1.04365800  | -0.37215600 |
| C | 6.17164700  | 1.23830300  | 1.72331600  |
| H | 7.18973200  | 1.59748800  | 1.55213800  |
| C | 5.67449000  | 1.11051200  | 3.02501700  |
| H | 6.30179800  | 1.36586500  | 3.88319400  |
| C | 4.37005500  | 0.66089600  | 3.22667300  |
| H | 3.97744700  | 0.56604400  | 4.24220700  |
| C | 3.53773000  | 0.32502400  | 2.14265400  |
| C | 2.15918400  | -0.16844300 | 2.48875600  |
| C | 1.19756000  | 0.74292100  | 3.01554200  |
| C | 0.09147400  | 0.27246000  | 3.74646700  |
| H | -0.65389300 | 0.96262000  | 4.13712500  |
| C | -0.03649800 | -1.09522700 | 3.97831200  |
| H | -0.88778500 | -1.45463700 | 4.55936400  |
| C | 0.87903000  | -2.02386700 | 3.47809600  |
| H | 0.73879700  | -3.08589900 | 3.67085000  |
| C | 1.97693800  | -1.56102300 | 2.73988800  |
| C | 2.81094500  | -3.76875600 | 2.33534700  |
| H | 2.78214300  | -4.12140300 | 3.38058300  |
| C | 0.53661900  | 3.02865700  | 3.27190300  |
| H | -0.45484100 | 2.89334400  | 2.81562200  |
| C | 2.96859300  | 1.73414400  | -1.50901200 |
| H | 4.03007900  | 1.91298600  | -1.75689600 |
| C | 2.15441300  | 1.68566500  | -2.81224400 |
| H | 2.52631000  | 0.88891500  | -3.47722400 |
| H | 1.11223600  | 1.44251100  | -2.56455400 |
| C | 2.18243900  | 3.03999400  | -3.53407100 |
| H | 3.21649000  | 3.26296300  | -3.85845500 |
| H | 1.57040700  | 2.98031100  | -4.45069300 |

|    |             |             |             |
|----|-------------|-------------|-------------|
| C  | 1.67761700  | 4.16599500  | -2.62371400 |
| H  | 0.62095700  | 3.98182000  | -2.36830400 |
| H  | 1.72674200  | 5.13555400  | -3.14957100 |
| C  | 2.48459000  | 4.22193500  | -1.32223200 |
| H  | 2.06756800  | 4.99040300  | -0.65141100 |
| H  | 3.52847300  | 4.51333600  | -1.54642300 |
| C  | 2.47514200  | 2.87135500  | -0.59618800 |
| H  | 1.44698700  | 2.65841300  | -0.27221100 |
| H  | 3.09087400  | 2.92987800  | 0.31453100  |
| C  | 3.74998400  | -1.15864100 | -1.67874500 |
| H  | 2.95045500  | -1.37744200 | -2.40732100 |
| C  | 4.99738300  | -0.73327800 | -2.47190300 |
| H  | 5.82161000  | -0.50370300 | -1.77680500 |
| H  | 4.80087100  | 0.17850800  | -3.05653500 |
| C  | 5.44261000  | -1.86798000 | -3.40751700 |
| H  | 4.65345400  | -2.04294800 | -4.16175200 |
| H  | 6.34648600  | -1.56093100 | -3.96072800 |
| C  | 5.70350300  | -3.16715500 | -2.63604100 |
| H  | 6.56416900  | -3.01637200 | -1.95811100 |
| H  | 5.98680600  | -3.97596200 | -3.33102000 |
| C  | 4.48093400  | -3.57839700 | -1.80717500 |
| H  | 4.70336900  | -4.48155400 | -1.21349700 |
| H  | 3.65025200  | -3.84180700 | -2.48734200 |
| C  | 4.02322900  | -2.44617000 | -0.88011600 |
| H  | 4.80526500  | -2.24372500 | -0.12761200 |
| H  | 3.12770300  | -2.74503900 | -0.31642900 |
| O  | 2.95368700  | -2.35825900 | 2.26101200  |
| O  | 1.45835100  | 2.04547500  | 2.80863200  |
| P  | 2.93189800  | 0.11205600  | -0.59236300 |
| C  | 0.24847100  | -1.21287200 | -1.55176200 |
| C  | -0.57499300 | -0.48617900 | -2.42558200 |
| C  | 0.59122700  | -2.53435300 | -1.88257200 |
| C  | -1.01306500 | -1.06147700 | -3.62623000 |
| H  | -0.88367400 | 0.52668400  | -2.16345500 |
| C  | 0.14361800  | -3.10856200 | -3.08171300 |
| H  | 1.21477100  | -3.13340200 | -1.21550300 |
| C  | -0.65242900 | -2.37088900 | -3.96395700 |
| H  | -1.65270400 | -0.47948000 | -4.29677300 |
| H  | 0.42398600  | -4.13862300 | -3.32200500 |
| H  | -0.99739300 | -2.81595600 | -4.90121000 |
| H  | 1.90141600  | -4.10847200 | 1.81102600  |
| H  | 3.69265900  | -4.19453300 | 1.83886500  |
| H  | 0.93651800  | 3.99624400  | 2.94675000  |
| H  | 0.46043700  | 3.01007900  | 4.37302900  |
| S  | -1.40984000 | 3.22287600  | -0.04184100 |
| O  | -2.16732700 | 2.46254000  | 0.98682000  |
| O  | -0.99843700 | 2.42658800  | -1.22284300 |
| O  | -0.40472400 | 4.16704900  | 0.48707200  |
| Pd | 0.83695000  | -0.50343900 | 0.23067000  |
| C  | -1.20522300 | -0.67282000 | 0.82300600  |
| C  | -1.52196100 | -1.87443400 | 1.02430400  |
| H  | -1.71172100 | 0.29746400  | 0.82367900  |
| C  | -1.40241800 | -3.33341800 | 1.09171700  |
| C  | -2.29008000 | -3.96165800 | 2.17598500  |

|   |             |             |             |
|---|-------------|-------------|-------------|
| H | -0.34160200 | -3.56196200 | 1.28773300  |
| H | -1.65170000 | -3.76190300 | 0.10627000  |
| C | -3.75308600 | -3.51319500 | 1.98888200  |
| H | -2.20927800 | -5.05938100 | 2.12667900  |
| H | -1.91706200 | -3.65672600 | 3.16716300  |
| C | -3.83945000 | -2.00359000 | 1.88976200  |
| H | -4.16068700 | -3.99917800 | 1.09208200  |
| H | -4.35022400 | -3.87301400 | 2.84675000  |
| C | -4.23922400 | -1.37463700 | 0.71969300  |
| C | -3.58901200 | -1.27650100 | 3.19571900  |
| C | -4.55777000 | -2.19869100 | -0.50116100 |
| H | -3.01122200 | -1.91412000 | 3.87896000  |
| H | -3.01613500 | -0.35131900 | 3.06056100  |
| H | -4.52629900 | -1.02429700 | 3.71956900  |
| C | -3.60568000 | -2.52786000 | -1.47738200 |
| C | -5.88446200 | -2.62875900 | -0.67481900 |
| C | -3.96936000 | -3.29089300 | -2.59249700 |
| H | -2.58221200 | -2.16556000 | -1.37923900 |
| C | -6.24744600 | -3.39343100 | -1.78769100 |
| H | -6.63516900 | -2.36666300 | 0.07569000  |
| C | -5.28784500 | -3.73037100 | -2.74919700 |
| H | -3.21407400 | -3.53373800 | -3.34355700 |
| H | -7.28234500 | -3.72713400 | -1.90333300 |
| H | -5.56848300 | -4.32849700 | -3.62040500 |
| N | -4.40410200 | -0.02089000 | 0.56797300  |
| C | -4.50541800 | 0.64971800  | -0.73951500 |
| C | -4.90958000 | 0.88949400  | 1.62101000  |
| H | -3.58408400 | 1.22568700  | -0.92462600 |
| H | -4.62829100 | -0.06995000 | -1.55549400 |
| C | -5.69696800 | 1.58762100  | -0.56923800 |
| H | -5.67427200 | 0.36130900  | 2.21046200  |
| H | -4.11336100 | 1.22119100  | 2.29767000  |
| C | -5.49956000 | 2.09450900  | 0.86335800  |
| H | -5.71339900 | 2.39470800  | -1.31519300 |
| H | -6.63471400 | 1.01193300  | -0.65548900 |
| H | -6.42788800 | 2.45600600  | 1.33091600  |
| H | -4.77114800 | 2.91743100  | 0.86873300  |
| C | -2.68701400 | 4.38305700  | -0.78188600 |
| F | -2.09568500 | 5.25106200  | -1.61263300 |
| F | -3.31475900 | 5.08307600  | 0.17367200  |
| F | -3.61590000 | 3.71562300  | -1.48129700 |

TS3

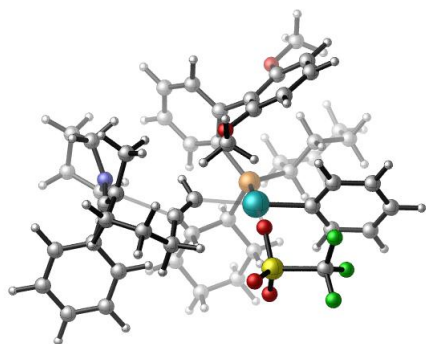

E (SMD(Acetone)/B3LYP-D3/Def2-SVP) = -3577.199064

E (SMD(Acetone)/M06/Def2-TZVPP//SMD(Acetone)/B3LYP-D3/Def2-SVP) = -3578.448017

|                                          |                             |
|------------------------------------------|-----------------------------|
| Zero-point correction=                   | 1.049025 (Hartree/Particle) |
| Thermal correction to Energy=            | 1.110962                    |
| Thermal correction to Enthalpy=          | 1.111907                    |
| Thermal correction to Gibbs Free Energy= | 0.951546                    |

Charge = 0 Multiplicity = 1

|   |             |             |             |
|---|-------------|-------------|-------------|
| C | 0.19169300  | -2.54253400 | 0.06344600  |
| C | -0.77681600 | -3.36608800 | 0.67198200  |
| H | -1.01945100 | -3.23976400 | 1.72540200  |
| C | -1.45461400 | -4.36309100 | -0.03003300 |
| H | -2.19412000 | -4.97932400 | 0.48623900  |
| C | -1.19301500 | -4.54793900 | -1.38687200 |
| H | -1.73303900 | -5.30416300 | -1.96214500 |
| C | -0.21170800 | -3.76943400 | -1.99930300 |
| H | 0.03433400  | -3.94165400 | -3.04989300 |
| C | 0.51193600  | -2.78288100 | -1.30344600 |
| C | 1.66709600  | -2.19817800 | -2.06538100 |
| C | 1.58635600  | -1.01762800 | -2.83425400 |
| C | 2.69608400  | -0.56926200 | -3.57677600 |
| H | 2.64603400  | 0.35708100  | -4.14582100 |
| C | 3.86625300  | -1.32568200 | -3.58853500 |
| H | 4.72776900  | -0.96991400 | -4.16008800 |
| C | 3.95290400  | -2.53750700 | -2.90229100 |
| H | 4.86743300  | -3.12693500 | -2.94738300 |
| C | 2.84194800  | -2.98055200 | -2.16825100 |
| C | 3.96841000  | -4.99391700 | -1.50101800 |
| H | 4.23260500  | -5.32916700 | -2.51920800 |
| C | 0.28481300  | 0.86940900  | -3.51011700 |
| H | 1.02012700  | 1.59921200  | -3.13903700 |
| C | -0.17618500 | -1.02744000 | 2.62562100  |
| H | -0.21081800 | -2.03962500 | 3.05787400  |
| C | 0.45549200  | -0.09496500 | 3.68071500  |
| H | 1.48363300  | -0.39849700 | 3.92408700  |
| H | 0.50975600  | 0.92502400  | 3.26207400  |
| C | -0.37824600 | -0.08117800 | 4.97090200  |
| H | -0.34005900 | -1.08648300 | 5.42968600  |
| H | 0.08003800  | 0.61301600  | 5.69566100  |

|    |             |             |             |
|----|-------------|-------------|-------------|
| C  | -1.83975100 | 0.29961900  | 4.71405600  |
| H  | -1.88586700 | 1.35081000  | 4.37411900  |
| H  | -2.42178300 | 0.24303900  | 5.64980500  |
| C  | -2.45779900 | -0.59513900 | 3.63567100  |
| H  | -3.48667400 | -0.27107600 | 3.40762400  |
| H  | -2.52678500 | -1.63407900 | 4.00832500  |
| C  | -1.61774500 | -0.56699800 | 2.35434700  |
| H  | -1.58606900 | 0.46200100  | 1.96600300  |
| H  | -2.09334300 | -1.17522200 | 1.57650500  |
| C  | 2.51006800  | -1.79773500 | 1.81726100  |
| H  | 2.80283100  | -0.98010500 | 2.49291700  |
| C  | 2.33869400  | -3.08185700 | 2.65227700  |
| H  | 2.02351200  | -3.90508500 | 1.98686600  |
| H  | 1.55275500  | -2.96735900 | 3.41319900  |
| C  | 3.65617000  | -3.45667000 | 3.34963700  |
| H  | 3.89836300  | -2.67436600 | 4.09244100  |
| H  | 3.52060700  | -4.39538100 | 3.91373500  |
| C  | 4.81957400  | -3.58757000 | 2.36121000  |
| H  | 4.63026800  | -4.44746300 | 1.69180700  |
| H  | 5.75746800  | -3.80574800 | 2.90023600  |
| C  | 4.96278900  | -2.32082200 | 1.51121800  |
| H  | 5.76287100  | -2.44605200 | 0.76159200  |
| H  | 5.26118400  | -1.47191700 | 2.15335000  |
| C  | 3.64419400  | -1.98721800 | 0.80334300  |
| H  | 3.38017400  | -2.82697900 | 0.15364900  |
| H  | 3.75805400  | -1.10052000 | 0.16859300  |
| O  | 2.81670500  | -4.16632100 | -1.50507000 |
| O  | 0.39799700  | -0.37568500 | -2.83596600 |
| P  | 0.90799800  | -1.15505300 | 1.08700800  |
| C  | 2.76466400  | 1.25374000  | 0.48103000  |
| C  | 3.27822600  | 1.48774700  | 1.76740700  |
| C  | 3.63923100  | 1.40288800  | -0.61101800 |
| C  | 4.61922300  | 1.85031400  | 1.95872500  |
| H  | 2.63211400  | 1.39497200  | 2.64257300  |
| C  | 4.97971400  | 1.76275700  | -0.42575600 |
| H  | 3.27816100  | 1.22902700  | -1.62744400 |
| C  | 5.47877300  | 1.98355800  | 0.86346400  |
| H  | 4.99177200  | 2.02895200  | 2.97253800  |
| H  | 5.63759600  | 1.86726200  | -1.29455900 |
| H  | 6.52643700  | 2.26081700  | 1.01213100  |
| H  | 0.39493300  | 0.74402000  | -4.60147600 |
| H  | -0.71528700 | 1.24972200  | -3.28263900 |
| H  | 3.71446600  | -5.87106300 | -0.89029500 |
| H  | 4.83845500  | -4.48429600 | -1.05223700 |
| S  | 0.67466500  | 4.17456500  | -0.21521600 |
| O  | 0.78695700  | 2.84442900  | -0.92445200 |
| O  | 0.38885300  | 4.07489000  | 1.22609200  |
| O  | -0.10673100 | 5.15157200  | -0.99431100 |
| Pd | 0.81609000  | 0.85904900  | 0.03994000  |
| C  | -1.27849200 | 0.42971400  | -0.59690200 |
| C  | -2.11896100 | 1.31668400  | -0.97018800 |
| H  | -1.50253500 | -0.64024000 | -0.61621100 |
| C  | -2.52188800 | 2.71358800  | -1.19616900 |
| C  | -3.36923600 | 2.86862200  | -2.46018900 |

|   |             |             |             |
|---|-------------|-------------|-------------|
| H | -1.60019500 | 3.30593300  | -1.27495300 |
| H | -3.08269400 | 3.09084700  | -0.32344800 |
| C | -4.50810300 | 1.83897800  | -2.39145600 |
| H | -3.76247600 | 3.89424900  | -2.53948700 |
| H | -2.74138900 | 2.69361800  | -3.34932500 |
| C | -3.95176600 | 0.47003400  | -2.04653500 |
| H | -5.24224400 | 2.16846600  | -1.64366500 |
| H | -5.03591800 | 1.79039600  | -3.36078500 |
| C | -4.39830500 | -0.21397800 | -0.90986600 |
| C | -3.22012900 | -0.21151900 | -3.18625300 |
| C | -5.18188200 | 0.50579700  | 0.15324700  |
| N | -4.19141100 | -1.54549400 | -0.68730600 |
| H | -2.70082100 | 0.53895800  | -3.79737000 |
| H | -2.45969300 | -0.91981400 | -2.83537400 |
| H | -3.90956200 | -0.74358800 | -3.86202500 |
| C | -4.57842400 | 1.25334000  | 1.17405500  |
| C | -6.58260100 | 0.38554500  | 0.13348200  |
| C | -4.44932900 | -2.20076000 | 0.60886500  |
| C | -4.29820400 | -2.57619400 | -1.75526100 |
| C | -5.35967600 | 1.87766900  | 2.15240100  |
| H | -3.49283800 | 1.32836600  | 1.21275600  |
| C | -7.36331100 | 1.01554300  | 1.10667700  |
| H | -7.06105700 | -0.20074400 | -0.65541700 |
| H | -3.51197300 | -2.65567900 | 0.96735600  |
| H | -4.78508500 | -1.48466100 | 1.36453100  |
| H | -4.94017000 | -2.18823100 | -2.55541200 |
| H | -3.31746800 | -2.81967500 | -2.18474200 |
| C | -6.75306000 | 1.76376900  | 2.12042300  |
| H | -4.87201800 | 2.45104600  | 2.94522400  |
| H | -8.45201600 | 0.92070000  | 1.07367800  |
| H | -7.36271000 | 2.25387900  | 2.88418900  |
| C | -5.46361800 | -3.28726600 | 0.26883900  |
| H | -5.52721300 | -4.06716300 | 1.04240200  |
| H | -6.46232900 | -2.83503200 | 0.14863700  |
| C | -4.93078900 | -3.80893400 | -1.07270900 |
| H | -5.71200900 | -4.26043900 | -1.70172400 |
| H | -4.16125500 | -4.57472300 | -0.89675900 |
| C | 2.41926800  | 4.88384500  | -0.31001600 |
| F | 3.20570000  | 4.39755700  | 0.64687000  |
| F | 2.36004800  | 6.21257200  | -0.16332500 |
| F | 2.97431400  | 4.61779700  | -1.49657000 |

V

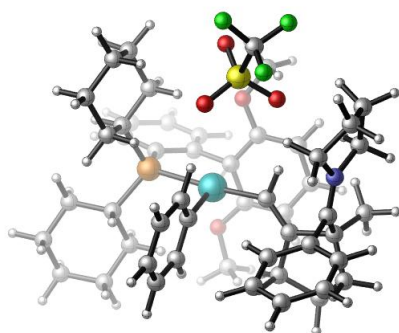

E (SMD(Acetone)/B3LYP-D3/Def2-SVP) = -3577.251058

E (SMD(Acetone)/M06/Def2-TZVPP//SMD(Acetone)/B3LYP-D3/Def2-SVP) = -3578.496409

|                                          |                             |
|------------------------------------------|-----------------------------|
| Zero-point correction=                   | 1.051907 (Hartree/Particle) |
| Thermal correction to Energy=            | 1.113968                    |
| Thermal correction to Enthalpy=          | 1.114912                    |
| Thermal correction to Gibbs Free Energy= | 0.951791                    |

Charge = 0 Multiplicity = 1

|   |             |             |             |
|---|-------------|-------------|-------------|
| C | 4.02978200  | 0.61168400  | 0.84245700  |
| C | 5.31662400  | 1.15260600  | 0.65728000  |
| H | 5.67646000  | 1.36882000  | -0.34957300 |
| C | 6.14185800  | 1.43650800  | 1.74563700  |
| H | 7.13857000  | 1.85439400  | 1.58104400  |
| C | 5.68218000  | 1.19085900  | 3.04432100  |
| H | 6.31757200  | 1.41174200  | 3.90623900  |
| C | 4.40287200  | 0.67057600  | 3.23815000  |
| H | 4.03710300  | 0.48846900  | 4.25203300  |
| C | 3.56111900  | 0.37747400  | 2.14847000  |
| C | 2.20209100  | -0.17112500 | 2.49301300  |
| C | 1.20209100  | 0.70891700  | 2.99391600  |
| C | 0.12581600  | 0.21257100  | 3.75274500  |
| H | -0.64235300 | 0.88256600  | 4.13545700  |
| C | 0.06477300  | -1.15218900 | 4.02972800  |
| H | -0.75563700 | -1.53169200 | 4.64113700  |
| C | 1.00887000  | -2.05381500 | 3.53310300  |
| H | 0.91564700  | -3.11668600 | 3.75002000  |
| C | 2.07378400  | -1.56343900 | 2.76336300  |
| C | 2.98824900  | -3.74309600 | 2.37805600  |
| H | 3.00805800  | -4.07938800 | 3.42926000  |
| C | 0.42785900  | 2.97042400  | 3.14032800  |
| H | -0.54412900 | 2.76270000  | 2.66895600  |
| C | 2.89061400  | 1.91602600  | -1.45502200 |
| H | 3.94601800  | 2.16940000  | -1.65953800 |
| C | 2.13188300  | 1.85869900  | -2.79133800 |
| H | 2.57302900  | 1.10238800  | -3.46113300 |
| H | 1.09541300  | 1.54889600  | -2.59641600 |
| C | 2.11726600  | 3.23155600  | -3.47856600 |
| H | 3.15106100  | 3.51253500  | -3.75578500 |
| H | 1.54571600  | 3.16637800  | -4.42084600 |

|    |             |             |             |
|----|-------------|-------------|-------------|
| C  | 1.52164300  | 4.30965100  | -2.56452500 |
| H  | 0.46421400  | 4.07138900  | -2.36262400 |
| H  | 1.54989600  | 5.29374100  | -3.06481000 |
| C  | 2.26432400  | 4.36915900  | -1.22498700 |
| H  | 1.77608600  | 5.09596400  | -0.55578100 |
| H  | 3.30132400  | 4.71894200  | -1.39061000 |
| C  | 2.29107500  | 2.99837100  | -0.53862600 |
| H  | 1.26000900  | 2.72035900  | -0.27558700 |
| H  | 2.85087500  | 3.05751600  | 0.40777900  |
| C  | 3.76093000  | -0.93861700 | -1.68798200 |
| H  | 2.97492000  | -1.14601600 | -2.43585600 |
| C  | 5.01597500  | -0.47368000 | -2.44388100 |
| H  | 5.82469600  | -0.26107000 | -1.72504600 |
| H  | 4.82102900  | 0.45869000  | -2.99630100 |
| C  | 5.49265000  | -1.56714900 | -3.41258100 |
| H  | 4.71892400  | -1.72439600 | -4.18663600 |
| H  | 6.40245900  | -1.23096100 | -3.93890600 |
| C  | 5.75591300  | -2.89045900 | -2.68352300 |
| H  | 6.60398400  | -2.75410800 | -1.98675800 |
| H  | 6.06026700  | -3.67091000 | -3.40189600 |
| C  | 4.52554200  | -3.34496500 | -1.88894500 |
| H  | 4.75021700  | -4.26634100 | -1.32441200 |
| H  | 3.70921400  | -3.59438700 | -2.59149900 |
| C  | 4.03864400  | -2.25104100 | -0.93099500 |
| H  | 4.80748100  | -2.06588700 | -0.16029800 |
| H  | 3.13958400  | -2.58092800 | -0.38904300 |
| O  | 3.07216300  | -2.33055700 | 2.27678000  |
| O  | 1.40839800  | 2.01649800  | 2.74629000  |
| P  | 2.89649900  | 0.27484700  | -0.56738900 |
| C  | 0.19702500  | -1.16326400 | -1.57099800 |
| C  | -0.57297900 | -0.37769100 | -2.44836500 |
| C  | 0.59568200  | -2.44154700 | -2.00871800 |
| C  | -0.89200100 | -0.83746100 | -3.73374800 |
| H  | -0.92756500 | 0.60432200  | -2.13093000 |
| C  | 0.26846400  | -2.90364000 | -3.29155400 |
| H  | 1.17615400  | -3.09379500 | -1.35303100 |
| C  | -0.47041500 | -2.09958000 | -4.16668300 |
| H  | -1.48578500 | -0.20164800 | -4.39825300 |
| H  | 0.59710700  | -3.89965100 | -3.60483500 |
| H  | -0.72290500 | -2.45679700 | -5.16904900 |
| H  | 2.07657500  | -4.12856400 | 1.89053400  |
| H  | 3.86972800  | -4.14271900 | 1.85911700  |
| H  | 0.78503700  | 3.94159500  | 2.77728700  |
| H  | 0.32410200  | 3.00351000  | 4.23918600  |
| S  | -1.62963500 | 3.20366700  | -0.13368900 |
| O  | -2.18807800 | 2.27491800  | 0.88290700  |
| O  | -1.24751200 | 2.56530500  | -1.41459100 |
| O  | -0.70011900 | 4.22463100  | 0.38988700  |
| Pd | 0.79608600  | -0.52064200 | 0.23672100  |
| C  | -1.09868000 | -1.00429300 | 0.81179500  |
| C  | -1.70855200 | -2.17974700 | 1.03315200  |
| H  | -1.69368100 | -0.08991400 | 0.95916000  |
| C  | -1.14412000 | -3.57109800 | 0.81003100  |
| C  | -2.02906100 | -4.50314600 | 1.64445600  |



|   |             |             |             |
|---|-------------|-------------|-------------|
| H | -0.07571200 | -3.61343400 | 1.07041600  |
| H | -1.22411200 | -3.83477700 | -0.25993100 |
| C | -3.42297100 | -3.87337900 | 1.50627400  |
| H | -2.01159700 | -5.54809100 | 1.29820400  |
| H | -1.70166300 | -4.49994500 | 2.69763300  |
| C | -3.16955100 | -2.33615400 | 1.60965700  |
| H | -3.83499800 | -4.14806000 | 0.52755800  |
| H | -4.13972200 | -4.21043500 | 2.27098700  |
| C | -3.99739400 | -1.51709100 | 0.63772600  |
| C | -3.21397700 | -1.95468300 | 3.09916100  |
| C | -4.35467800 | -2.16831700 | -0.66372900 |
| H | -2.62176200 | -2.69268300 | 3.65739700  |
| H | -2.77150200 | -0.97577500 | 3.30074600  |
| H | -4.24103900 | -1.98730900 | 3.49344700  |
| C | -3.43048000 | -2.37476500 | -1.69461300 |
| C | -5.67892500 | -2.62064000 | -0.81105700 |
| C | -3.82976700 | -3.02972500 | -2.86475400 |
| H | -2.40915300 | -2.01500500 | -1.58625400 |
| C | -6.06787800 | -3.27944600 | -1.97861000 |
| H | -6.40011900 | -2.45923600 | -0.00571300 |
| C | -5.14278500 | -3.48619800 | -3.00911800 |
| H | -3.10189700 | -3.17628000 | -3.66563600 |
| H | -7.09722700 | -3.63193900 | -2.08320200 |
| H | -5.44781000 | -4.00041000 | -3.92426200 |
| N | -4.39712300 | -0.28520400 | 0.80384100  |
| C | -4.90724800 | 0.57242800  | -0.30490300 |
| C | -4.44586000 | 0.51746800  | 2.06823300  |
| H | -4.03309400 | 1.12450500  | -0.68245700 |
| H | -5.33167700 | -0.02691000 | -1.11353700 |
| C | -5.89195400 | 1.50338600  | 0.38156900  |
| H | -4.98622200 | -0.07107100 | 2.81629400  |
| H | -3.42786000 | 0.71780600  | 2.41328600  |
| C | -5.19113400 | 1.81098100  | 1.70890400  |
| H | -6.08386600 | 2.40156800  | -0.22065200 |
| H | -6.84836000 | 0.97978100  | 0.54602600  |
| H | -5.89035200 | 2.09906000  | 2.50689100  |
| H | -4.46518300 | 2.62144700  | 1.57162700  |
| C | -3.11178500 | 4.23763900  | -0.64572100 |
| F | -4.03197400 | 3.49528000  | -1.28357300 |
| F | -3.70505000 | 4.79587400  | 0.42006500  |
| F | -2.73455500 | 5.21925800  | -1.47259300 |

TS4

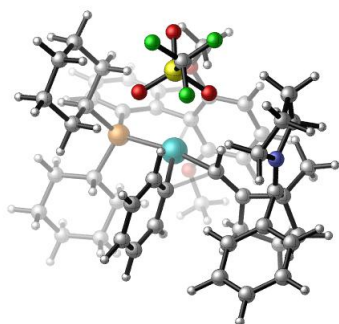

E (SMD(Acetone)/B3LYP-D3/Def2-SVP) = -3577.235678

E (SMD(Acetone)/M06/Def2-TZVPP//SMD(Acetone)/B3LYP-D3/Def2-SVP) = -3578.49099

|                                          |                             |
|------------------------------------------|-----------------------------|
| Zero-point correction=                   | 1.050881 (Hartree/Particle) |
| Thermal correction to Energy=            | 1.112589                    |
| Thermal correction to Enthalpy=          | 1.113533                    |
| Thermal correction to Gibbs Free Energy= | 0.951008                    |

Charge = 0 Multiplicity = 1

|   |             |             |             |
|---|-------------|-------------|-------------|
| C | -4.22434800 | 0.40025400  | -0.70323900 |
| C | -5.47398400 | 0.99348800  | -0.43897400 |
| H | -5.64192300 | 1.51118100  | 0.50671500  |
| C | -6.51390700 | 0.94181800  | -1.36862700 |
| H | -7.47503700 | 1.40947000  | -1.13858600 |
| C | -6.31702700 | 0.29052600  | -2.59050200 |
| H | -7.12386200 | 0.23932500  | -3.32666400 |
| C | -5.07796600 | -0.28472800 | -2.87316400 |
| H | -4.91488000 | -0.78114000 | -3.83324400 |
| C | -4.01886800 | -0.23228900 | -1.94820700 |
| C | -2.71715100 | -0.83450500 | -2.38066700 |
| C | -1.71108300 | -0.02145600 | -2.95650200 |
| C | -0.59341500 | -0.60542000 | -3.58438800 |
| H | 0.17934300  | 0.01621000  | -4.03466000 |
| C | -0.49167300 | -1.99549000 | -3.62970000 |
| H | 0.36003500  | -2.45052200 | -4.13633500 |
| C | -1.44518300 | -2.82291100 | -3.03189500 |
| H | -1.32276300 | -3.90479300 | -3.06375300 |
| C | -2.55740500 | -2.23885400 | -2.40520700 |
| C | -3.36340600 | -4.33330400 | -1.57427400 |
| H | -3.34503000 | -4.90478700 | -2.51893900 |
| C | -0.84420400 | 2.20099600  | -3.13474100 |
| H | 0.02125200  | 1.96461900  | -2.49698400 |
| C | -2.92602300 | 2.16935700  | 1.19730900  |
| H | -3.96765500 | 2.36817900  | 1.50333000  |
| C | -2.02013700 | 2.35954500  | 2.42688500  |
| H | -2.29145000 | 1.65137000  | 3.22688700  |
| H | -0.97800600 | 2.14731400  | 2.13988400  |
| C | -2.11992200 | 3.80044100  | 2.95191800  |
| H | -3.14543500 | 3.97531100  | 3.32953500  |
| H | -1.44249100 | 3.92888100  | 3.81422300  |

|    |             |             |             |
|----|-------------|-------------|-------------|
| C  | -1.79261800 | 4.83256100  | 1.86400900  |
| H  | -0.73199600 | 4.72989400  | 1.58600100  |
| H  | -1.93808400 | 5.85538600  | 2.25416500  |
| C  | -2.64769000 | 4.61699400  | 0.60857700  |
| H  | -2.33746300 | 5.31699700  | -0.18663900 |
| H  | -3.70670300 | 4.84428200  | 0.83519100  |
| C  | -2.54253200 | 3.17440500  | 0.09481700  |
| H  | -1.50496300 | 2.97998700  | -0.22208800 |
| H  | -3.18142900 | 3.03749900  | -0.79222900 |
| C  | -3.46576700 | -0.66674900 | 1.93596800  |
| H  | -2.61071800 | -0.63584300 | 2.63598800  |
| C  | -4.72466500 | -0.22905500 | 2.69920300  |
| H  | -5.58983100 | -0.23716000 | 2.01484900  |
| H  | -4.61916900 | 0.80191600  | 3.07272000  |
| C  | -5.01184600 | -1.18278400 | 3.86927500  |
| H  | -4.18632200 | -1.11400900 | 4.60172900  |
| H  | -5.92842000 | -0.86551000 | 4.39583200  |
| C  | -5.14467600 | -2.63403300 | 3.39257500  |
| H  | -6.03459600 | -2.71858000 | 2.74119600  |
| H  | -5.31616800 | -3.30691000 | 4.25035900  |
| C  | -3.90547200 | -3.07503900 | 2.60474300  |
| H  | -4.03676600 | -4.10191300 | 2.22177000  |
| H  | -3.03283100 | -3.09913200 | 3.28335500  |
| C  | -3.60625800 | -2.11979000 | 1.44318400  |
| H  | -4.41906000 | -2.17511200 | 0.69879200  |
| H  | -2.69091100 | -2.43225100 | 0.91557100  |
| O  | -3.54168600 | -2.94563400 | -1.79899400 |
| O  | -1.92783000 | 1.31219800  | -2.89367000 |
| P  | -2.85812600 | 0.42596700  | 0.54025500  |
| C  | 0.44364500  | -0.77998500 | 1.45058800  |
| C  | 1.18824600  | 0.25564100  | 2.06720700  |
| C  | 0.05960500  | -1.87842600 | 2.26427200  |
| C  | 1.51602800  | 0.20160700  | 3.42425500  |
| H  | 1.49060500  | 1.12241400  | 1.48221100  |
| C  | 0.39128200  | -1.92299700 | 3.62222000  |
| H  | -0.52836800 | -2.69261100 | 1.84049500  |
| C  | 1.12359100  | -0.88627400 | 4.21498600  |
| H  | 2.08387800  | 1.02546800  | 3.86782200  |
| H  | 0.06638200  | -2.77790600 | 4.22336300  |
| H  | 1.38243600  | -0.92590900 | 5.27645600  |
| H  | -2.43508300 | -4.53739800 | -1.01224600 |
| H  | -4.22378900 | -4.66440000 | -0.97665900 |
| H  | -1.20043800 | 3.20508600  | -2.87557800 |
| H  | -0.53838000 | 2.19109600  | -4.19597400 |
| S  | 1.56952200  | 3.36641300  | -0.38214100 |
| O  | 2.05900400  | 2.08679100  | -0.96209800 |
| O  | 0.93656800  | 3.23894500  | 0.95014100  |
| O  | 0.90247200  | 4.27681800  | -1.33342700 |
| Pd | -0.76189600 | -0.39639600 | -0.16548500 |
| C  | 1.18127300  | -1.06632500 | -0.33248500 |
| C  | 1.68853100  | -2.28712700 | -0.63058400 |
| H  | 1.78794500  | -0.18486100 | -0.57273600 |
| C  | 1.12032300  | -3.63170800 | -0.23883200 |
| C  | 1.93237800  | -4.66587000 | -1.02719100 |

|   |            |             |             |
|---|------------|-------------|-------------|
| H | 0.03509800 | -3.68454800 | -0.41293600 |
| H | 1.27845000 | -3.77847300 | 0.84716400  |
| C | 3.32978300 | -4.03394100 | -1.09153600 |
| H | 1.94835600 | -5.65714900 | -0.54937900 |
| H | 1.51163400 | -4.79510400 | -2.03773800 |
| C | 3.05603900 | -2.51965100 | -1.36036000 |
| H | 3.82855300 | -4.18519500 | -0.12632900 |
| H | 3.97758700 | -4.46501200 | -1.87003900 |
| C | 4.02327800 | -1.59537300 | -0.63312500 |
| C | 2.91426200 | -2.34759400 | -2.88541000 |
| C | 4.57619900 | -2.08039400 | 0.67121200  |
| H | 2.30372100 | -3.17603200 | -3.26694300 |
| H | 2.40585700 | -1.42174200 | -3.16712400 |
| H | 3.89332600 | -2.40335500 | -3.38426700 |
| C | 3.79787600 | -2.18127300 | 1.83129900  |
| C | 5.92106300 | -2.49188100 | 0.69476500  |
| C | 4.36359700 | -2.68404400 | 3.00749600  |
| H | 2.75870700 | -1.86258400 | 1.81866100  |
| C | 6.47641900 | -3.00074200 | 1.87018500  |
| H | 6.52713600 | -2.41698700 | -0.21177700 |
| C | 5.69894400 | -3.09637600 | 3.03073700  |
| H | 3.74905100 | -2.74952600 | 3.90848400  |
| H | 7.52060500 | -3.32347800 | 1.87894700  |
| H | 6.13573200 | -3.49204500 | 3.95132700  |
| N | 4.37077800 | -0.39599600 | -1.01232300 |
| C | 5.04248700 | 0.59390800  | -0.11727300 |
| C | 4.16966200 | 0.24951300  | -2.35002500 |
| H | 4.23018700 | 1.15595500  | 0.36779500  |
| H | 5.64513700 | 0.09869100  | 0.64739200  |
| C | 5.82754000 | 1.48007300  | -1.06936800 |
| H | 4.61140100 | -0.40682500 | -3.10633300 |
| H | 3.09875200 | 0.36874800  | -2.53747400 |
| C | 4.88833300 | 1.60157100  | -2.27353200 |
| H | 6.06112700 | 2.45053700  | -0.60981100 |
| H | 6.77381300 | 0.98726500  | -1.34733700 |
| H | 5.41946100 | 1.82032100  | -3.21082800 |
| H | 4.14999300 | 2.39124400  | -2.09797400 |
| C | 3.15656000 | 4.27409300  | 0.04486300  |
| F | 2.88537100 | 5.43243600  | 0.65598400  |
| F | 3.88216500 | 4.54591200  | -1.05101300 |
| F | 3.92237700 | 3.54085600  | 0.87039700  |

## VI

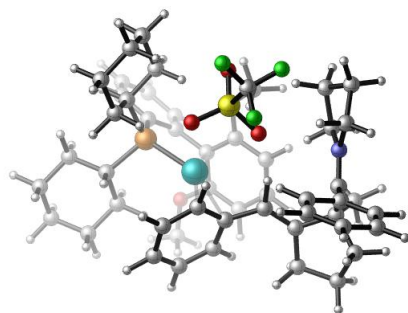

E (SMD(Acetone)/B3LYP-D3/Def2-SVP) = -3577.287275

E (SMD(Acetone)/M06/Def2-TZVPP//SMD(Acetone)/B3LYP-D3/Def2-SVP) = -3578.546353

|                                          |                             |
|------------------------------------------|-----------------------------|
| Zero-point correction=                   | 1.053995 (Hartree/Particle) |
| Thermal correction to Energy=            | 1.115914                    |
| Thermal correction to Enthalpy=          | 1.116859                    |
| Thermal correction to Gibbs Free Energy= | 0.954965                    |

Charge = 0 Multiplicity = 1

|   |             |             |             |
|---|-------------|-------------|-------------|
| C | -4.11423800 | 0.42184900  | -1.31450600 |
| C | -5.20931400 | 1.26012200  | -1.60264600 |
| H | -5.37855100 | 2.15853000  | -1.00784900 |
| C | -6.10046400 | 0.97592300  | -2.63977400 |
| H | -6.93966900 | 1.64894500  | -2.83573600 |
| C | -5.91446000 | -0.17060500 | -3.41689800 |
| H | -6.60751500 | -0.41028200 | -4.22794700 |
| C | -4.82537500 | -1.00326500 | -3.15822900 |
| H | -4.66222900 | -1.89246700 | -3.77257700 |
| C | -3.91287500 | -0.72016700 | -2.12612800 |
| C | -2.73946300 | -1.63192000 | -1.97744700 |
| C | -1.47314900 | -1.22420300 | -2.44990400 |
| C | -0.36960100 | -2.09190300 | -2.36992100 |
| H | 0.60339200  | -1.78132200 | -2.74078200 |
| C | -0.53480600 | -3.35732300 | -1.80648900 |
| H | 0.32718100  | -4.02499700 | -1.73630900 |
| C | -1.77116400 | -3.77904700 | -1.31401100 |
| H | -1.86981200 | -4.76620800 | -0.86421500 |
| C | -2.87561200 | -2.91262800 | -1.40694400 |
| C | -4.28644400 | -4.36567300 | -0.12842400 |
| H | -4.11321600 | -5.30367400 | -0.68524500 |
| C | -0.15144700 | 0.65699200  | -3.10757900 |
| H | 0.36250400  | 0.71105300  | -2.13439600 |
| C | -2.93021200 | 2.65217400  | 0.14947400  |
| H | -3.95995100 | 3.04465000  | 0.10872700  |
| C | -2.27541800 | 3.16915800  | 1.44305500  |
| H | -2.85729900 | 2.85141600  | 2.32402500  |
| H | -1.26834000 | 2.73218100  | 1.53749600  |
| C | -2.14565100 | 4.69941000  | 1.43033600  |
| H | -3.15467000 | 5.15412800  | 1.43973500  |
| H | -1.64107800 | 5.03451500  | 2.35337100  |

|    |             |             |             |
|----|-------------|-------------|-------------|
| C  | -1.37725200 | 5.18898900  | 0.19713000  |
| H  | -0.34375300 | 4.80969100  | 0.24527800  |
| H  | -1.32407900 | 6.29209400  | 0.19156900  |
| C  | -2.02834400 | 4.67946700  | -1.09395300 |
| H  | -1.43650800 | 4.99509800  | -1.97043100 |
| H  | -3.03032700 | 5.13596000  | -1.20676800 |
| C  | -2.16106600 | 3.15093700  | -1.08733400 |
| H  | -1.15092200 | 2.71229700  | -1.08337200 |
| H  | -2.65940600 | 2.80739700  | -2.00892000 |
| C  | -4.09561600 | 0.33802200  | 1.60512100  |
| H  | -3.44829500 | 0.59839200  | 2.46184500  |
| C  | -5.42237400 | 1.09637600  | 1.76122200  |
| H  | -6.07733700 | 0.86994500  | 0.90295300  |
| H  | -5.25537100 | 2.18549300  | 1.75875700  |
| C  | -6.14415900 | 0.68269500  | 3.05332900  |
| H  | -5.53153900 | 0.98525400  | 3.92286800  |
| H  | -7.10171600 | 1.22513800  | 3.13834800  |
| C  | -6.38066100 | -0.83118800 | 3.10516400  |
| H  | -7.07562800 | -1.11451700 | 2.29256500  |
| H  | -6.87140300 | -1.11249400 | 4.05296200  |
| C  | -5.06685400 | -1.60121900 | 2.93032200  |
| H  | -5.25518100 | -2.68893100 | 2.91417900  |
| H  | -4.41258500 | -1.40721000 | 3.80034000  |
| C  | -4.33171500 | -1.18282700 | 1.65153600  |
| H  | -4.92036200 | -1.48842600 | 0.77000600  |
| H  | -3.36932200 | -1.71341600 | 1.57695300  |
| O  | -4.11525100 | -3.22407400 | -0.94974900 |
| O  | -1.41354500 | 0.01722200  | -2.98859700 |
| P  | -3.00019400 | 0.78269600  | 0.13589500  |
| C  | 0.59324100  | -1.52340600 | 1.52141300  |
| C  | 0.41376000  | -0.29090700 | 2.23905900  |
| C  | -0.22610300 | -2.62854800 | 1.93261700  |
| C  | -0.38357400 | -0.25169100 | 3.41169900  |
| H  | 1.05711300  | 0.56196800  | 2.01277700  |
| C  | -1.02508500 | -2.55856300 | 3.06954200  |
| H  | -0.20697400 | -3.54845000 | 1.35100700  |
| C  | -1.07676800 | -1.37798300 | 3.84108100  |
| H  | -0.43893400 | 0.68295000  | 3.97679200  |
| H  | -1.62299600 | -3.42700700 | 3.35964100  |
| H  | -1.68534000 | -1.34119800 | 4.74849200  |
| H  | -3.61732600 | -4.34026600 | 0.74921600  |
| H  | -5.32971500 | -4.34728500 | 0.21608300  |
| H  | -0.35171800 | 1.67824000  | -3.45575200 |
| H  | 0.49558700  | 0.15236700  | -3.84515500 |
| S  | 1.83867000  | 2.69072700  | 0.06729000  |
| O  | 2.42937600  | 1.33424700  | -0.08041100 |
| O  | 1.10856100  | 2.92115100  | 1.33135400  |
| O  | 1.22739500  | 3.23075600  | -1.16688900 |
| Pd | -0.99316300 | -0.32826900 | 0.43306800  |
| C  | 1.74710700  | -1.64403800 | 0.60467500  |
| C  | 2.47523800  | -2.74500800 | 0.32741200  |
| H  | 2.06296400  | -0.69000100 | 0.18003800  |
| C  | 2.29600500  | -4.14254500 | 0.89932700  |
| C  | 3.61929700  | -4.89418700 | 0.63632200  |

|   |            |             |             |
|---|------------|-------------|-------------|
| H | 1.44320900 | -4.66084200 | 0.43220000  |
| H | 2.06322500 | -4.07674900 | 1.97455400  |
| C | 4.61075200 | -3.80041500 | 0.21650700  |
| H | 3.97779800 | -5.43274500 | 1.52606800  |
| H | 3.49406100 | -5.64452000 | -0.15854700 |
| C | 3.74047700 | -2.75904500 | -0.55944800 |
| H | 5.02489200 | -3.34047800 | 1.12225800  |
| H | 5.45115900 | -4.17047800 | -0.39001500 |
| C | 4.43554900 | -1.39360700 | -0.61175500 |
| C | 3.43370300 | -3.35667900 | -1.95629000 |
| C | 5.37733600 | -1.01130000 | 0.48651200  |
| H | 3.22216300 | -4.42887100 | -1.85427700 |
| H | 2.55653400 | -2.90913300 | -2.43158000 |
| H | 4.30216000 | -3.25641800 | -2.62551900 |
| C | 4.92687600 | -0.13595900 | 1.48769900  |
| C | 6.70289600 | -1.47213900 | 0.49928700  |
| C | 5.79873200 | 0.25534500  | 2.50773200  |
| H | 3.91141700 | 0.25993400  | 1.44713600  |
| C | 7.57014600 | -1.06619400 | 1.51612100  |
| H | 7.05325700 | -2.14341100 | -0.28741400 |
| C | 7.11828400 | -0.20756000 | 2.52507300  |
| H | 5.44286300 | 0.93628100  | 3.28502600  |
| H | 8.60258900 | -1.42454100 | 1.52055500  |
| H | 7.79807000 | 0.10507700  | 3.32195400  |
| N | 4.26916300 | -0.49633800 | -1.53612200 |
| C | 5.09032100 | 0.75658100  | -1.60173200 |
| C | 3.25754100 | -0.47260100 | -2.63235800 |
| H | 4.76967400 | 1.40323400  | -0.77952600 |
| H | 6.14796900 | 0.50207700  | -1.46914600 |
| C | 4.74936800 | 1.36453700  | -2.95653600 |
| H | 3.57671500 | -1.17414000 | -3.41321800 |
| H | 2.29223400 | -0.78155900 | -2.22559900 |
| C | 3.28668800 | 0.96243700  | -3.15329500 |
| H | 4.90435300 | 2.45205100  | -2.94948800 |
| H | 5.38457100 | 0.92722300  | -3.74409700 |
| H | 2.95864900 | 1.00612400  | -4.20110800 |
| H | 2.63104500 | 1.60237000  | -2.54946000 |
| C | 3.35407900 | 3.77301300  | 0.28185300  |
| F | 3.00278900 | 5.03988500  | 0.52485800  |
| F | 4.11702000 | 3.76013500  | -0.82419300 |
| F | 4.10865400 | 3.34332300  | 1.30328700  |

TS5

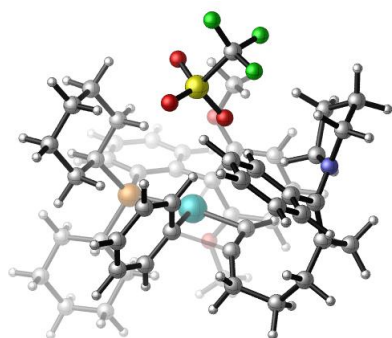

E (SMD(Acetone)/B3LYP-D3/Def2-SVP) = -3577.199645

E (SMD(Acetone)/M06/Def2-TZVPP//SMD(Acetone)/B3LYP-D3/Def2-SVP) = -3578.452322

|                                          |                             |
|------------------------------------------|-----------------------------|
| Zero-point correction=                   | 1.046599 (Hartree/Particle) |
| Thermal correction to Energy=            | 1.109514                    |
| Thermal correction to Enthalpy=          | 1.110458                    |
| Thermal correction to Gibbs Free Energy= | 0.947387                    |

Charge = 0 Multiplicity = 1

|   |             |             |             |
|---|-------------|-------------|-------------|
| C | -3.90120400 | 0.85370000  | -1.20362500 |
| C | -5.00830600 | 1.71694300  | -1.31390900 |
| H | -5.35347600 | 2.27767000  | -0.44433100 |
| C | -5.67043400 | 1.88167400  | -2.53060500 |
| H | -6.52850800 | 2.55551500  | -2.59700900 |
| C | -5.22787900 | 1.18511800  | -3.66054100 |
| H | -5.73967800 | 1.30582900  | -4.61896000 |
| C | -4.11942200 | 0.34432500  | -3.56538400 |
| H | -3.75987500 | -0.18694100 | -4.45040800 |
| C | -3.43984800 | 0.17350400  | -2.34547500 |
| C | -2.22932300 | -0.72353600 | -2.38453600 |
| C | -1.01557100 | -0.20595500 | -2.94360900 |
| C | -0.04499600 | -1.07498300 | -3.47420500 |
| H | 0.87891700  | -0.68615400 | -3.89611600 |
| C | -0.29229100 | -2.44813900 | -3.47795800 |
| H | 0.45697700  | -3.11701200 | -3.90913700 |
| C | -1.45412500 | -3.00007100 | -2.92921600 |
| H | -1.60299000 | -4.07865200 | -2.93768500 |
| C | -2.42450800 | -2.14144400 | -2.39108900 |
| C | -3.83851100 | -3.93363900 | -1.67482400 |
| H | -3.85631700 | -4.50592700 | -2.61772100 |
| C | 0.26807500  | 1.75441100  | -3.44255500 |
| H | 1.13725900  | 1.42039900  | -2.86055800 |
| C | -2.70740100 | 2.35681200  | 0.97113000  |
| H | -3.67632500 | 2.88059200  | 0.89826800  |
| C | -2.23719000 | 2.40938500  | 2.43456600  |
| H | -2.99851200 | 1.97574100  | 3.10204000  |
| H | -1.33038400 | 1.79841600  | 2.54359100  |
| C | -1.92207300 | 3.84657300  | 2.87176600  |
| H | -2.85882600 | 4.43466800  | 2.88989600  |
| H | -1.53579100 | 3.83644300  | 3.90570100  |



|    |             |             |             |
|----|-------------|-------------|-------------|
| C  | -0.92057500 | 4.52226600  | 1.92849200  |
| H  | 0.05024400  | 3.99716100  | 1.97171300  |
| H  | -0.73631500 | 5.56232200  | 2.24974400  |
| C  | -1.41865800 | 4.48853900  | 0.48005800  |
| H  | -0.66366400 | 4.92626500  | -0.18959700 |
| H  | -2.34236500 | 5.09092600  | 0.38984500  |
| C  | -1.70152800 | 3.05031100  | 0.03360300  |
| H  | -0.75398900 | 2.48733500  | 0.02960600  |
| H  | -2.07011800 | 3.03330700  | -1.00457900 |
| C  | -4.18701000 | -0.16509200 | 1.58573600  |
| H  | -3.59084700 | -0.18487700 | 2.51457500  |
| C  | -5.48560900 | 0.60333400  | 1.87758700  |
| H  | -6.09745700 | 0.64898900  | 0.96144900  |
| H  | -5.26837400 | 1.64182000  | 2.17376800  |
| C  | -6.29601200 | -0.10234600 | 2.97496800  |
| H  | -5.72159900 | -0.08200500 | 3.91951000  |
| H  | -7.23200300 | 0.45109500  | 3.16185700  |
| C  | -6.60046700 | -1.55655400 | 2.59668200  |
| H  | -7.26030200 | -1.56664000 | 1.70924000  |
| H  | -7.15497600 | -2.05753200 | 3.40844800  |
| C  | -5.31541500 | -2.32750200 | 2.27356100  |
| H  | -5.55263400 | -3.35598800 | 1.95179600  |
| H  | -4.70508300 | -2.41595600 | 3.19148700  |
| C  | -4.48636000 | -1.62340700 | 1.19180300  |
| H  | -5.03309900 | -1.63576600 | 0.23339200  |
| H  | -3.54640400 | -2.17168300 | 1.01507800  |
| O  | -3.61060600 | -2.54983300 | -1.90590500 |
| O  | -0.92858800 | 1.13024200  | -2.97567100 |
| P  | -3.00050800 | 0.61735300  | 0.38005900  |
| C  | -0.35209100 | -0.75142100 | 1.89891200  |
| C  | 0.69446100  | 0.17116500  | 2.08488500  |
| C  | -1.13201800 | -1.15069100 | 3.00270000  |
| C  | 0.93946900  | 0.70685800  | 3.35303800  |
| H  | 1.30823200  | 0.48142600  | 1.24024800  |
| C  | -0.87943600 | -0.61528400 | 4.26656200  |
| H  | -1.92685800 | -1.88816800 | 2.87164400  |
| C  | 0.15814000  | 0.31234400  | 4.44460600  |
| H  | 1.74360200  | 1.43587700  | 3.47309600  |
| H  | -1.49241500 | -0.92335400 | 5.11802400  |
| H  | 0.35583500  | 0.72445500  | 5.43775800  |
| H  | -3.07145300 | -4.35725000 | -1.00437700 |
| H  | -4.82186500 | -4.00717700 | -1.19199000 |
| H  | 0.13659500  | 2.82912200  | -3.27091400 |
| H  | 0.41834800  | 1.56030400  | -4.51826600 |
| S  | 2.21655100  | 2.83383200  | -0.29046500 |
| O  | 2.03040000  | 1.41942700  | -0.71509000 |
| O  | 2.34381900  | 3.02755300  | 1.17266100  |
| O  | 1.38248800  | 3.81738400  | -1.01130900 |
| Pd | -1.15355000 | -0.80302500 | -0.05656600 |
| C  | 0.34446000  | -2.21078900 | -0.24919200 |
| C  | 0.53957600  | -2.39782000 | 0.99146400  |
| H  | 0.63020000  | -2.59417100 | -1.22588100 |
| C  | 1.00910900  | -3.19410900 | 2.14453200  |
| C  | 1.86983300  | -4.41173600 | 1.74876300  |

|   |            |             |             |
|---|------------|-------------|-------------|
| H | 0.11526600 | -3.54138800 | 2.68740800  |
| H | 1.56136700 | -2.54510900 | 2.84330800  |
| C | 3.35334100 | -4.09999600 | 1.47038600  |
| H | 1.82677800 | -5.10720300 | 2.60333200  |
| H | 1.40774100 | -4.94036800 | 0.89863500  |
| C | 3.66432200 | -3.46472500 | 0.13260000  |
| H | 3.72937800 | -3.48961700 | 2.30238400  |
| H | 3.89802200 | -5.06182200 | 1.52120900  |
| C | 4.22950600 | -2.23118000 | -0.01524800 |
| C | 3.30801200 | -4.29972300 | -1.07208200 |
| C | 4.71254900 | -1.40752500 | 1.14036300  |
| H | 3.39263400 | -5.37436500 | -0.83762700 |
| H | 2.27286500 | -4.13689200 | -1.42322000 |
| H | 3.97414300 | -4.07401500 | -1.91896000 |
| C | 4.21223900 | -0.10342800 | 1.30341500  |
| C | 5.67830200 | -1.87097900 | 2.05151300  |
| C | 4.63571100 | 0.70395700  | 2.36135700  |
| H | 3.49119500 | 0.28540400  | 0.58496700  |
| C | 6.10570200 | -1.06491500 | 3.11278600  |
| H | 6.10083500 | -2.87094100 | 1.92211400  |
| C | 5.58202100 | 0.22361900  | 3.27498400  |
| H | 4.21956800 | 1.71049400  | 2.45090800  |
| H | 6.85682200 | -1.44295400 | 3.81233400  |
| H | 5.91851300 | 0.85296400  | 4.10378200  |
| N | 4.35327200 | -1.62880800 | -1.28011800 |
| C | 5.50047400 | -0.78715100 | -1.62120200 |
| C | 3.19573600 | -1.32315200 | -2.13686200 |
| H | 5.55445300 | 0.13205200  | -1.00725900 |
| H | 6.44688900 | -1.33520400 | -1.47628200 |
| C | 5.23423300 | -0.42112800 | -3.08154600 |
| H | 2.84718100 | -2.21351600 | -2.69063400 |
| H | 2.34810900 | -0.95204600 | -1.54187100 |
| C | 3.71051600 | -0.23738600 | -3.09547100 |
| H | 5.78135700 | 0.48098800  | -3.39660100 |
| H | 5.53245900 | -1.25302100 | -3.74260400 |
| H | 3.27222900 | -0.32015200 | -4.10188600 |
| H | 3.45276900 | 0.75123900  | -2.69278200 |
| C | 3.93633300 | 3.24726800  | -0.92223600 |
| F | 4.24475500 | 4.51882600  | -0.64204700 |
| F | 4.00713300 | 3.08893700  | -2.25358300 |
| F | 4.87207400 | 2.46426600  | -0.36677600 |

## Gibbs free energy profile for model reaction with PhBr (Figure 2)

### PhBr

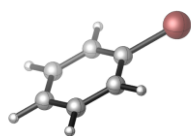

E (SMD(Acetone)/B3LYP-D3/Def2-SVP) = -2805.369671

E (SMD(Acetone)/M06/Def2-TZVPP//SMD(Acetone)/B3LYP-D3/Def2-SVP) = -2805.618447

|                                          |                             |
|------------------------------------------|-----------------------------|
| Zero-point correction=                   | 0.090434 (Hartree/Particle) |
| Thermal correction to Energy=            | 0.096127                    |
| Thermal correction to Enthalpy=          | 0.097071                    |
| Thermal correction to Gibbs Free Energy= | 0.059548                    |

Charge = 0 Multiplicity = 1

|    |             |             |             |
|----|-------------|-------------|-------------|
| C  | -0.10214600 | -0.00000600 | -0.00036000 |
| C  | -0.78618300 | 1.21954300  | -0.00009100 |
| C  | -0.78619200 | -1.21955100 | -0.00011000 |
| C  | -2.18545300 | 1.21042300  | 0.00011800  |
| H  | -0.23810600 | 2.16361000  | -0.00023400 |
| C  | -2.18545800 | -1.21041800 | 0.00013800  |
| H  | -0.23812100 | -2.16362300 | -0.00027000 |
| C  | -2.88704200 | 0.00000600  | -0.00005800 |
| H  | -2.72639300 | 2.16040500  | 0.00023900  |
| H  | -2.72640300 | -2.16039700 | 0.00027000  |
| H  | -3.97992800 | 0.00001100  | 0.00025800  |
| Br | 1.81439400  | 0.00000100  | 0.00005500  |

### IIa

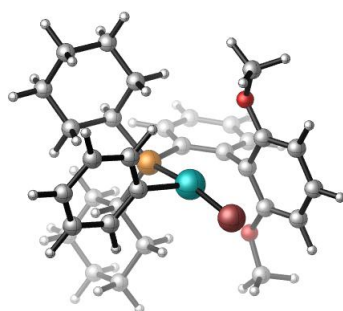

E (SMD(Acetone)/B3LYP-D3/Def2-SVP) = -4436.239576

E (SMD(Acetone)/M06/Def2-TZVPP//SMD(Acetone)/B3LYP-D3/Def2-SVP) = -4436.890229

|                                          |                             |
|------------------------------------------|-----------------------------|
| Zero-point correction=                   | 0.651439 (Hartree/Particle) |
| Thermal correction to Energy=            | 0.688747                    |
| Thermal correction to Enthalpy=          | 0.689691                    |
| Thermal correction to Gibbs Free Energy= | 0.580377                    |

Charge = 0 Multiplicity = 1

|   |             |             |             |
|---|-------------|-------------|-------------|
| C | 0.27122100  | 2.12812300  | 1.05308900  |
| C | -0.24843000 | 3.33272500  | 1.56647800  |
| H | -1.31819300 | 3.53824300  | 1.51169800  |
| C | 0.58841200  | 4.28279400  | 2.15193900  |
| H | 0.16661500  | 5.21242000  | 2.54257300  |
| C | 1.96376400  | 4.03925300  | 2.23243200  |
| H | 2.63004500  | 4.77873500  | 2.68456300  |
| C | 2.48259300  | 2.83957700  | 1.74711100  |
| H | 3.55326200  | 2.63558000  | 1.82784100  |
| C | 1.64854900  | 1.86778000  | 1.16375700  |
| C | 2.30767400  | 0.58039600  | 0.75919800  |
| C | 2.44823400  | -0.44842000 | 1.73406600  |
| C | 3.41887500  | -1.44951200 | 1.58276200  |
| H | 3.52050400  | -2.24587600 | 2.31812800  |
| C | 4.24420800  | -1.42472700 | 0.45935600  |
| H | 4.99395700  | -2.21010800 | 0.33711300  |
| C | 4.12834600  | -0.44338600 | -0.52776300 |
| H | 4.77519300  | -0.47335300 | -1.40322300 |
| C | 3.16682300  | 0.56247700  | -0.37499200 |
| C | 3.66982400  | 1.57944900  | -2.48318700 |
| H | 4.76375900  | 1.65329000  | -2.35585400 |
| C | 1.48105000  | -1.44856000 | 3.68061300  |
| H | 1.17721400  | -2.35499900 | 3.12940800  |
| C | -2.28043600 | 0.77306500  | 1.33788400  |
| H | -2.48981100 | 1.80753400  | 1.65799600  |
| C | -3.55948100 | 0.23374400  | 0.67156100  |
| H | -3.85237600 | 0.87408300  | -0.17471300 |
| H | -3.37638300 | -0.77033400 | 0.26429100  |
| C | -4.70887300 | 0.16074200  | 1.68708900  |
| H | -4.97542800 | 1.18383700  | 2.01162700  |
| H | -5.60456500 | -0.25959900 | 1.19892100  |
| C | -4.32763700 | -0.67336400 | 2.91548000  |
| H | -4.15017800 | -1.71834200 | 2.60098300  |
| H | -5.16164600 | -0.69674400 | 3.63752100  |
| C | -3.05959100 | -0.12687900 | 3.58126500  |
| H | -2.77056500 | -0.75610100 | 4.44035500  |
| H | -3.26583400 | 0.88232900  | 3.98336900  |
| C | -1.89561800 | -0.04469400 | 2.58662500  |
| H | -1.60731300 | -1.06198800 | 2.27258200  |
| H | -1.00621500 | 0.39401300  | 3.06651000  |
| C | -1.37568900 | 1.70804300  | -1.36555500 |
| H | -2.11102100 | 0.98282000  | -1.75280800 |
| C | -2.08115900 | 3.06559600  | -1.21217700 |
| H | -1.36709800 | 3.80568400  | -0.81538500 |
| H | -2.91120900 | 2.99927900  | -0.49106000 |
| C | -2.59583100 | 3.56361700  | -2.57069600 |
| H | -3.36601100 | 2.86511800  | -2.94650400 |
| H | -3.08967900 | 4.54224200  | -2.44512100 |
| C | -1.45785900 | 3.66479400  | -3.59277300 |
| H | -0.74236500 | 4.43890100  | -3.25822900 |
| H | -1.84674200 | 3.99518000  | -4.57108100 |
| C | -0.72036800 | 2.32865500  | -3.73503600 |

|    |             |             |             |
|----|-------------|-------------|-------------|
| H  | 0.12985200  | 2.42866700  | -4.43118800 |
| H  | -1.40541800 | 1.58222400  | -4.17792700 |
| C  | -0.22194900 | 1.80362800  | -2.38260600 |
| H  | 0.56042100  | 2.47185000  | -1.98372500 |
| H  | 0.25547300  | 0.81854300  | -2.51128700 |
| O  | 2.99365000  | 1.58903400  | -1.23538100 |
| O  | 1.62899400  | -0.34141700 | 2.80399700  |
| P  | -0.80051100 | 0.89316000  | 0.21066300  |
| Pd | 0.42380800  | -1.00375100 | -0.27043300 |
| C  | -1.25402700 | -1.92376800 | -0.83200700 |
| C  | -1.83337300 | -2.86455000 | 0.03556500  |
| C  | -1.86330100 | -1.67923100 | -2.07115400 |
| C  | -3.01928700 | -3.52091800 | -0.31685500 |
| H  | -1.36690900 | -3.08917000 | 0.99753500  |
| C  | -3.05192300 | -2.33641600 | -2.42112500 |
| H  | -1.41961800 | -0.97207600 | -2.77569600 |
| C  | -3.64031800 | -3.25249600 | -1.54290000 |
| H  | -3.46108900 | -4.24378700 | 0.37581500  |
| H  | -3.51847800 | -2.12593200 | -3.38839900 |
| H  | -4.57003700 | -3.76006400 | -1.81439200 |
| H  | 2.40856100  | -1.65499800 | 4.24182000  |
| H  | 0.68888600  | -1.17691300 | 4.39123800  |
| H  | 3.43170300  | 0.67150600  | -3.06334100 |
| H  | 3.31446000  | 2.46107000  | -3.03371900 |
| Br | 1.66197400  | -3.02639400 | -1.09919600 |

### IIIa

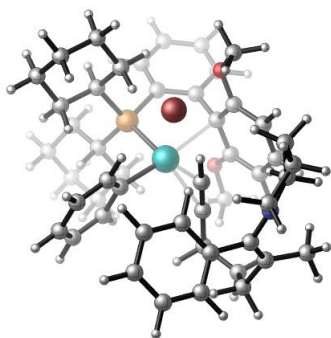

E (SMD(Acetone)/B3LYP-D3/Def2-SVP) = -5190.19896

E (SMD(Acetone)/M06/Def2-TZVPP//SMD(Acetone)/B3LYP-D3/Def2-SVP) = -5191.021723

|                                          |                             |
|------------------------------------------|-----------------------------|
| Zero-point correction=                   | 1.019515 (Hartree/Particle) |
| Thermal correction to Energy=            | 1.075446                    |
| Thermal correction to Enthalpy=          | 1.076390                    |
| Thermal correction to Gibbs Free Energy= | 0.928549                    |

Charge = 0 Multiplicity = 1

|   |            |             |            |
|---|------------|-------------|------------|
| C | 3.70432400 | -1.26927900 | 0.64891300 |
| C | 5.02258600 | -1.31673100 | 1.14331900 |
| H | 5.57644500 | -0.39436400 | 1.32048500 |
| C | 5.63740800 | -2.53612900 | 1.42655100 |

|   |             |             |             |
|---|-------------|-------------|-------------|
| H | 6.66181200  | -2.55332300 | 1.80707700  |
| C | 4.93584000  | -3.72936700 | 1.22388400  |
| H | 5.40912500  | -4.69112500 | 1.43856100  |
| C | 3.62041500  | -3.68865400 | 0.76343100  |
| H | 3.06017900  | -4.61744700 | 0.62961800  |
| C | 2.98472800  | -2.46627500 | 0.47896700  |
| C | 1.54183300  | -2.54628500 | 0.06445500  |
| C | 0.56413700  | -2.78028600 | 1.07766000  |
| C | -0.70785700 | -3.27157200 | 0.74219000  |
| H | -1.46576100 | -3.42820800 | 1.50755400  |
| C | -0.98979100 | -3.56281200 | -0.59260600 |
| H | -1.97992900 | -3.94695800 | -0.84977700 |
| C | -0.06081200 | -3.35699400 | -1.61480400 |
| H | -0.32439700 | -3.58474000 | -2.64627500 |
| C | 1.20939000  | -2.85757200 | -1.28525900 |
| C | 1.97382800  | -2.88451700 | -3.55749300 |
| H | 1.72097700  | -3.93781400 | -3.76742100 |
| C | 0.05527500  | -2.63423900 | 3.41657300  |
| H | -0.75442500 | -1.89304700 | 3.30599900  |
| C | 3.10285000  | 1.32788900  | 1.80060300  |
| H | 4.14436000  | 1.15714500  | 2.12501500  |
| C | 2.90389400  | 2.84188900  | 1.61511200  |
| H | 3.63114500  | 3.24417500  | 0.89238800  |
| H | 1.90326200  | 3.03296000  | 1.20160400  |
| C | 3.03632100  | 3.57575600  | 2.95723900  |
| H | 4.07358500  | 3.47602600  | 3.32796800  |
| H | 2.85765700  | 4.65388000  | 2.80515100  |
| C | 2.06927900  | 3.01382000  | 4.00594200  |
| H | 1.02944800  | 3.18706400  | 3.67354800  |
| H | 2.19127900  | 3.54713600  | 4.96435200  |
| C | 2.27880800  | 1.50793300  | 4.19874100  |
| H | 1.54073600  | 1.10666800  | 4.91340600  |
| H | 3.28027100  | 1.32933100  | 4.63322100  |
| C | 2.15001600  | 0.75534500  | 2.87012300  |
| H | 1.10498000  | 0.83349200  | 2.52246200  |
| H | 2.34261500  | -0.31971300 | 3.01529400  |
| C | 3.92160700  | 1.12860600  | -1.10483500 |
| H | 3.38732400  | 2.08132600  | -1.26000500 |
| C | 5.38792900  | 1.45995600  | -0.77749300 |
| H | 5.95236700  | 0.52534600  | -0.62908100 |
| H | 5.46396500  | 2.03795100  | 0.15679200  |
| C | 6.02523500  | 2.23726300  | -1.93899700 |
| H | 5.50915100  | 3.20831900  | -2.05172600 |
| H | 7.07833000  | 2.46366000  | -1.70080100 |
| C | 5.93132400  | 1.45358200  | -3.25365600 |
| H | 6.54029300  | 0.53455800  | -3.16773800 |
| H | 6.36112900  | 2.04111800  | -4.08266200 |
| C | 4.48244700  | 1.06501300  | -3.57119400 |
| H | 4.43999800  | 0.44909100  | -4.48559100 |
| H | 3.89653300  | 1.97958300  | -3.77730400 |
| C | 3.82880900  | 0.30981200  | -2.40706100 |
| H | 4.33473800  | -0.65996100 | -2.25932700 |
| H | 2.77929400  | 0.07308000  | -2.64361200 |
| O | 2.20666600  | -2.67058800 | -2.17270300 |

|    |             |             |             |
|----|-------------|-------------|-------------|
| O  | 0.97828700  | -2.54595400 | 2.33322100  |
| P  | 2.91163900  | 0.33750800  | 0.23782200  |
| C  | 0.44395000  | 1.87569100  | -0.77334300 |
| C  | -0.31163500 | 2.64943000  | 0.12042600  |
| C  | 0.87254100  | 2.43636900  | -1.98472200 |
| C  | -0.61143500 | 3.98193100  | -0.19191200 |
| H  | -0.68248800 | 2.21776900  | 1.05632000  |
| C  | 0.56438500  | 3.77074500  | -2.29148500 |
| H  | 1.44660000  | 1.84760300  | -2.70303900 |
| C  | -0.17209400 | 4.54948300  | -1.39380600 |
| H  | -1.19890100 | 4.57716300  | 0.51321100  |
| H  | 0.90595000  | 4.19649800  | -3.23975200 |
| H  | -0.40891900 | 5.59008700  | -1.63202500 |
| H  | 1.16838300  | -2.23460600 | -3.93826600 |
| H  | 2.91179800  | -2.63138700 | -4.06929300 |
| H  | 0.63184900  | -2.39825300 | 4.32129900  |
| H  | -0.35472000 | -3.65458100 | 3.51029400  |
| Pd | 0.73050700  | -0.07140100 | -0.38918200 |
| C  | -1.54859200 | -0.35072200 | -0.28032800 |
| C  | -1.42407100 | -0.38066300 | -1.50149600 |
| H  | -1.77981100 | -0.24814500 | 0.78507500  |
| C  | -1.40209000 | -0.34494800 | -2.96557600 |
| C  | -2.56676800 | -1.06647300 | -3.67005700 |
| H  | -0.44922000 | -0.77683000 | -3.31108900 |
| H  | -1.38759300 | 0.71720400  | -3.26745100 |
| C  | -3.97593900 | -0.52629100 | -3.33315100 |
| H  | -2.38796100 | -0.94750000 | -4.75122200 |
| H  | -2.50555900 | -2.14735100 | -3.46529700 |
| C  | -4.61279100 | -1.13567700 | -2.09920100 |
| H  | -3.91877300 | 0.56907500  | -3.26576400 |
| H  | -4.62640400 | -0.74939400 | -4.19937800 |
| C  | -4.94728000 | -0.43668700 | -0.97226100 |
| C  | -4.83437800 | -2.62842100 | -2.17803900 |
| C  | -4.92891700 | 1.06069900  | -0.91374300 |
| H  | -5.00340500 | -2.93558400 | -3.22406500 |
| H  | -3.97910400 | -3.22428300 | -1.81136500 |
| H  | -5.71268500 | -2.93114400 | -1.58803900 |
| C  | -4.22038500 | 1.72335100  | 0.10712200  |
| C  | -5.63336300 | 1.84030600  | -1.84912800 |
| C  | -4.19077700 | 3.11830300  | 0.16704500  |
| H  | -3.68144600 | 1.15162900  | 0.86683200  |
| C  | -5.60374100 | 3.23792300  | -1.79065300 |
| H  | -6.21380100 | 1.34070200  | -2.62912100 |
| C  | -4.87698000 | 3.88360700  | -0.78409600 |
| H  | -3.62338300 | 3.60552800  | 0.96442300  |
| H  | -6.15587500 | 3.82398200  | -2.53093800 |
| H  | -4.85213000 | 4.97589300  | -0.73623800 |
| N  | -5.28090600 | -1.08568600 | 0.22231300  |
| C  | -6.25308000 | -0.54942700 | 1.18024100  |
| C  | -4.49180600 | -2.17413000 | 0.81286800  |
| H  | -5.97485200 | 0.46152600  | 1.52963000  |
| H  | -7.25957100 | -0.47047900 | 0.73199400  |
| C  | -6.20302600 | -1.54333900 | 2.34747600  |
| H  | -4.82135800 | -3.17388600 | 0.46986800  |

|    |             |             |            |
|----|-------------|-------------|------------|
| H  | -3.43145500 | -2.07375700 | 0.53973900 |
| C  | -4.74732800 | -2.02703900 | 2.31469900 |
| H  | -6.49224200 | -1.07888500 | 3.30277400 |
| H  | -6.88838400 | -2.38818000 | 2.16070900 |
| H  | -4.58750700 | -2.96890400 | 2.86346500 |
| H  | -4.07406200 | -1.25928700 | 2.73286700 |
| Br | -1.87874200 | 0.66844200  | 3.03275000 |

#### IVa

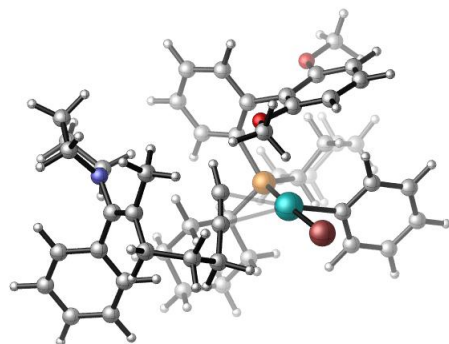

E (SMD(Acetone)/B3LYP-D3/Def2-SVP) = -5190.198108

E (SMD(Acetone)/M06/Def2-TZVPP//SMD(Acetone)/B3LYP-D3/Def2-SVP) = -5191.019611

|                                          |                             |
|------------------------------------------|-----------------------------|
| Zero-point correction=                   | 1.019607 (Hartree/Particle) |
| Thermal correction to Energy=            | 1.076520                    |
| Thermal correction to Enthalpy=          | 1.077464                    |
| Thermal correction to Gibbs Free Energy= | 0.925561                    |

Charge = 0 Multiplicity = 1

|   |             |             |             |
|---|-------------|-------------|-------------|
| C | -0.75858500 | 2.06403600  | -0.25303100 |
| C | 0.08665400  | 3.10555800  | 0.18547700  |
| H | 0.41916700  | 3.13918900  | 1.22162300  |
| C | 0.53235400  | 4.11463200  | -0.66919100 |
| H | 1.19334900  | 4.89580000  | -0.28551000 |
| C | 0.13556900  | 4.10789300  | -2.00660400 |
| H | 0.48843600  | 4.87776700  | -2.69775200 |
| C | -0.74044300 | 3.11758200  | -2.44912600 |
| H | -1.09030700 | 3.13081300  | -3.48416700 |
| C | -1.21734700 | 2.09900400  | -1.60279900 |
| C | -2.25832300 | 1.20376300  | -2.21393000 |
| C | -1.92399200 | 0.02178200  | -2.90914500 |
| C | -2.92108900 | -0.77387800 | -3.50271400 |
| H | -2.66659900 | -1.71416900 | -3.98839600 |
| C | -4.24625300 | -0.34240000 | -3.46731100 |
| H | -5.02391300 | -0.96372000 | -3.91953400 |
| C | -4.59663800 | 0.87763600  | -2.88737600 |
| H | -5.63130900 | 1.21595700  | -2.91184900 |
| C | -3.59331900 | 1.66411900  | -2.29631800 |
| C | -5.14142500 | 3.42298800  | -1.78003100 |
| H | -5.54671400 | 3.54666100  | -2.79946700 |
| C | -0.18016400 | -1.41660900 | -3.70430600 |



|    |             |             |             |
|----|-------------|-------------|-------------|
| H  | -0.53072200 | -2.33618800 | -3.20831700 |
| C  | 0.16245600  | 0.86478100  | 2.32749400  |
| H  | 0.01946700  | 1.87960000  | 2.72769300  |
| C  | -0.13196200 | -0.12945800 | 3.47145000  |
| H  | -1.18312100 | -0.08070300 | 3.79189600  |
| H  | 0.03795700  | -1.15581500 | 3.10022800  |
| C  | 0.77891200  | 0.14784100  | 4.67732100  |
| H  | 0.51134100  | 1.13238800  | 5.10309500  |
| H  | 0.58521500  | -0.59875100 | 5.46631600  |
| C  | 2.26359700  | 0.15131600  | 4.29530700  |
| H  | 2.56445400  | -0.87120900 | 4.00232300  |
| H  | 2.88367400  | 0.42389700  | 5.16642700  |
| C  | 2.53415100  | 1.09672100  | 3.12017700  |
| H  | 3.59276900  | 1.04559600  | 2.82261200  |
| H  | 2.33955400  | 2.14047900  | 3.42946700  |
| C  | 1.64065500  | 0.74286500  | 1.92473800  |
| H  | 1.85154600  | -0.28895100 | 1.61451700  |
| H  | 1.88285900  | 1.37846900  | 1.06331100  |
| C  | -2.68259900 | 1.23857700  | 1.89127100  |
| H  | -2.91728400 | 0.35486600  | 2.50482700  |
| C  | -2.51503000 | 2.45109600  | 2.82797300  |
| H  | -2.23745700 | 3.33799300  | 2.23045000  |
| H  | -1.71027500 | 2.29173800  | 3.55898800  |
| C  | -3.81704500 | 2.72992400  | 3.59744600  |
| H  | -4.01291500 | 1.87939100  | 4.27620200  |
| H  | -3.68139500 | 3.61831100  | 4.23786100  |
| C  | -5.02113400 | 2.91510000  | 2.66902300  |
| H  | -4.88174900 | 3.83612400  | 2.07282700  |
| H  | -5.94238300 | 3.05623700  | 3.25999500  |
| C  | -5.16119100 | 1.72418200  | 1.71704200  |
| H  | -5.99064200 | 1.88923700  | 1.00870000  |
| H  | -5.41356800 | 0.81431800  | 2.29159100  |
| C  | -3.85977600 | 1.49091900  | 0.94230900  |
| H  | -3.63447100 | 2.38513700  | 0.34667700  |
| H  | -3.98084000 | 0.66002600  | 0.23833600  |
| O  | -3.82106800 | 2.90613400  | -1.80269400 |
| O  | -0.60519400 | -0.25642500 | -3.00238100 |
| P  | -1.13071800 | 0.69958400  | 0.97157000  |
| C  | -2.86446100 | -1.84268700 | 0.82314100  |
| C  | -3.03699400 | -2.21509400 | 2.16548700  |
| C  | -3.98867100 | -1.79537200 | -0.01501700 |
| C  | -4.31193900 | -2.52550900 | 2.66139600  |
| H  | -2.17964000 | -2.26110400 | 2.84118900  |
| C  | -5.26208200 | -2.09968400 | 0.48254700  |
| H  | -3.87758300 | -1.51578000 | -1.06338500 |
| C  | -5.43130600 | -2.46424200 | 1.82400100  |
| H  | -4.42658900 | -2.81230000 | 3.71136700  |
| H  | -6.12683200 | -2.04780400 | -0.18628900 |
| H  | -6.42606900 | -2.70029200 | 2.21224100  |
| H  | -0.52114300 | -1.39496600 | -4.75394900 |
| H  | 0.91601400  | -1.39803700 | -3.68521400 |
| H  | -5.07801400 | 4.40876400  | -1.29892100 |
| H  | -5.82350500 | 2.78280000  | -1.19531300 |
| Pd | -1.03500600 | -1.48027200 | 0.09945400  |

|    |             |             |             |
|----|-------------|-------------|-------------|
| C  | 1.14054300  | -0.76094600 | -0.85675000 |
| C  | 1.63567500  | -1.83416600 | -0.54997600 |
| H  | 0.94969400  | 0.22642100  | -1.23603900 |
| C  | 2.30527200  | -3.09577800 | -0.24922400 |
| C  | 3.39208700  | -3.48168900 | -1.27647700 |
| H  | 1.53170300  | -3.88065900 | -0.24148200 |
| H  | 2.72752000  | -3.05726100 | 0.76916400  |
| C  | 4.65043400  | -2.58748600 | -1.33506300 |
| H  | 3.71634900  | -4.50693700 | -1.03346000 |
| H  | 2.91979000  | -3.54039500 | -2.27056100 |
| C  | 4.40834200  | -1.13168900 | -1.67664500 |
| H  | 5.20718800  | -2.68636800 | -0.39357400 |
| H  | 5.30011600  | -3.01817300 | -2.12182800 |
| C  | 4.76893400  | -0.07834500 | -0.88732200 |
| C  | 3.79573400  | -0.89016500 | -3.03308400 |
| C  | 5.38359200  | -0.21457900 | 0.47348400  |
| N  | 4.64534300  | 1.24645300  | -1.36232500 |
| H  | 3.11955400  | -1.70835000 | -3.31900900 |
| H  | 3.23125400  | 0.05331000  | -3.05764200 |
| H  | 4.56927000  | -0.83663700 | -3.82176100 |
| C  | 4.84249700  | -1.02240700 | 1.48860900  |
| C  | 6.54057100  | 0.53321500  | 0.77798400  |
| C  | 4.11813100  | 2.32543900  | -0.51942500 |
| C  | 5.46295100  | 1.77268000  | -2.45837400 |
| C  | 5.45198800  | -1.11678300 | 2.74403000  |
| H  | 3.91672700  | -1.56255700 | 1.30234200  |
| C  | 7.14814600  | 0.44775900  | 2.03232400  |
| H  | 6.96718300  | 1.18892100  | 0.01564600  |
| H  | 3.02292100  | 2.42431000  | -0.64945000 |
| H  | 4.29453500  | 2.13659400  | 0.55208200  |
| H  | 6.54590700  | 1.63831100  | -2.25608000 |
| H  | 5.25324000  | 1.27508800  | -3.41914800 |
| C  | 6.60994200  | -0.38486400 | 3.02223800  |
| H  | 5.00479200  | -1.75100100 | 3.51410800  |
| H  | 8.04889000  | 1.03262600  | 2.23909300  |
| H  | 7.08422100  | -0.45247000 | 4.00501600  |
| C  | 4.83844100  | 3.58243000  | -1.01709500 |
| H  | 4.25061700  | 4.50046100  | -0.86367800 |
| H  | 5.79838800  | 3.70075100  | -0.48588400 |
| C  | 5.09773400  | 3.25996400  | -2.49419800 |
| H  | 5.88665600  | 3.87761500  | -2.94999900 |
| H  | 4.17230300  | 3.40425800  | -3.07804600 |
| Br | -1.11963900 | -3.86238700 | -0.78241400 |

## TS2a

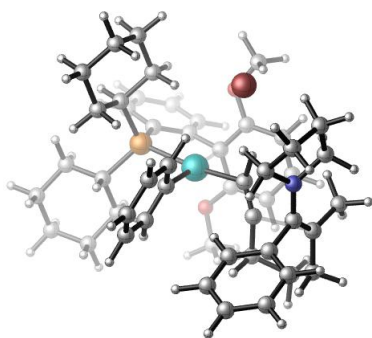

E (SMD(Acetone)/B3LYP-D3/Def2-SVP) = -5190.1857

E (SMD(Acetone)/M06/Def2-TZVPP//SMD(Acetone)/B3LYP-D3/Def2-SVP) = -5191.006488

|                                          |                             |
|------------------------------------------|-----------------------------|
| Zero-point correction=                   | 1.018267 (Hartree/Particle) |
| Thermal correction to Energy=            | 1.074742                    |
| Thermal correction to Enthalpy=          | 1.075686                    |
| Thermal correction to Gibbs Free Energy= | 0.925085                    |

Charge = 0 Multiplicity = 1

|   |             |             |             |
|---|-------------|-------------|-------------|
| C | -3.97698200 | -0.42734500 | 0.64323000  |
| C | -5.33985700 | -0.63339400 | 0.35459500  |
| H | -5.71252500 | -0.49615300 | -0.66132900 |
| C | -6.23045700 | -1.02719200 | 1.35362400  |
| H | -7.28564300 | -1.18071300 | 1.11314800  |
| C | -5.76512900 | -1.22554100 | 2.65833100  |
| H | -6.45507600 | -1.53031100 | 3.44969600  |
| C | -4.41142000 | -1.05134000 | 2.94502100  |
| H | -4.04023300 | -1.23077000 | 3.95730900  |
| C | -3.50103100 | -0.66135200 | 1.94606500  |
| C | -2.05337600 | -0.58431500 | 2.34999600  |
| C | -1.31231100 | -1.80097600 | 2.43289700  |
| C | -0.13973000 | -1.87431400 | 3.20679500  |
| H | 0.44097600  | -2.79395800 | 3.25299300  |
| C | 0.26752800  | -0.75071000 | 3.92313400  |
| H | 1.17258400  | -0.81200300 | 4.53135800  |
| C | -0.42889000 | 0.46047300  | 3.87231700  |
| H | -0.06924300 | 1.32019900  | 4.43472400  |
| C | -1.58896200 | 0.54255500  | 3.08986500  |
| C | -1.97442600 | 2.84374400  | 3.63711200  |
| H | -1.92440400 | 2.72622200  | 4.73324100  |
| C | -1.15449500 | -4.08114400 | 1.70734100  |
| H | -0.19510000 | -3.95523000 | 1.17667700  |
| C | -3.03845000 | -1.08546800 | -2.02531400 |
| H | -4.13152200 | -1.17645500 | -2.15290900 |
| C | -2.43612100 | -0.62485400 | -3.36405700 |
| H | -2.89085700 | 0.32427600  | -3.68959100 |
| H | -1.36108700 | -0.43403200 | -3.23306800 |
| C | -2.62326000 | -1.69493700 | -4.44868800 |
| H | -3.70198500 | -1.81566200 | -4.66156500 |
| H | -2.15264500 | -1.35418400 | -5.38681000 |

|    |             |             |             |
|----|-------------|-------------|-------------|
| C  | -2.04044900 | -3.04504400 | -4.01507200 |
| H  | -0.94785700 | -2.94504100 | -3.88053200 |
| H  | -2.19829100 | -3.80187200 | -4.80269800 |
| C  | -2.65675800 | -3.50959600 | -2.69108400 |
| H  | -2.19585500 | -4.45745100 | -2.36510700 |
| H  | -3.73447800 | -3.71097100 | -2.83890500 |
| C  | -2.47403100 | -2.45496800 | -1.59394800 |
| H  | -1.39621800 | -2.36130000 | -1.37037900 |
| H  | -2.95288200 | -2.78516000 | -0.65852600 |
| C  | -3.36293200 | 1.80104600  | -1.22349800 |
| H  | -2.60031500 | 2.05393200  | -1.98045400 |
| C  | -4.74281100 | 1.87466700  | -1.89817500 |
| H  | -5.52584200 | 1.63555600  | -1.16026500 |
| H  | -4.82624200 | 1.13520000  | -2.70992600 |
| C  | -4.99534300 | 3.28996700  | -2.43936000 |
| H  | -4.25786200 | 3.51090600  | -3.23280100 |
| H  | -5.99161600 | 3.33671400  | -2.91115000 |
| C  | -4.88029000 | 4.34190900  | -1.32948300 |
| H  | -5.69141900 | 4.17922200  | -0.59558600 |
| H  | -5.02700100 | 5.35432500  | -1.74290100 |
| C  | -3.52961800 | 4.25044800  | -0.60918900 |
| H  | -3.48796500 | 4.97202100  | 0.22458300  |
| H  | -2.72239500 | 4.52995400  | -1.31109100 |
| C  | -3.26184300 | 2.83409600  | -0.08483100 |
| H  | -3.99858200 | 2.58138200  | 0.69753600  |
| H  | -2.27417800 | 2.78233500  | 0.39975800  |
| O  | -2.36980200 | 1.63829700  | 2.99964700  |
| O  | -1.85937600 | -2.84468300 | 1.78863000  |
| P  | -2.78675600 | 0.13265600  | -0.63990700 |
| C  | 0.13536500  | 0.92495600  | -1.38004200 |
| C  | 0.87050100  | 0.12544200  | -2.27143600 |
| C  | 0.04597100  | 2.30502200  | -1.62049100 |
| C  | 1.47979500  | 0.69736900  | -3.39578400 |
| H  | 0.98363600  | -0.94712300 | -2.08116200 |
| C  | 0.65959500  | 2.87328100  | -2.74786600 |
| H  | -0.50302100 | 2.95563800  | -0.93617300 |
| C  | 1.37351000  | 2.07133700  | -3.64352600 |
| H  | 2.04917500  | 0.05984200  | -4.07935900 |
| H  | 0.57774000  | 3.95099500  | -2.91915800 |
| H  | 1.85358500  | 2.51493600  | -4.52009500 |
| H  | -0.99814400 | 3.19730600  | 3.26500800  |
| H  | -2.74311500 | 3.58827000  | 3.39073700  |
| H  | -1.79743100 | -4.75466300 | 1.12436100  |
| H  | -0.99731100 | -4.51703100 | 2.70936900  |
| Pd | -0.65689600 | 0.13371800  | 0.28869000  |
| C  | 1.38422400  | -0.15206600 | 0.83422400  |
| C  | 1.86718700  | 0.86606400  | 1.39114800  |
| H  | 1.70080600  | -1.12796000 | 0.43883600  |
| C  | 1.94092500  | 2.21953700  | 1.94951400  |
| C  | 2.92691200  | 2.32943600  | 3.12045900  |
| H  | 0.92363700  | 2.49047000  | 2.27631400  |
| H  | 2.22674900  | 2.92629700  | 1.15161500  |
| C  | 4.31477600  | 1.81824600  | 2.68591400  |
| H  | 2.98514900  | 3.37671500  | 3.45833400  |

|    |            |             |             |
|----|------------|-------------|-------------|
| H  | 2.54476900 | 1.73956600  | 3.96956900  |
| C  | 4.21226600 | 0.44416900  | 2.05086000  |
| H  | 4.75692300 | 2.54945100  | 1.99626700  |
| H  | 4.97534500 | 1.77809500  | 3.57182600  |
| C  | 4.51546900 | 0.24429300  | 0.70880000  |
| C  | 3.91946000 | -0.66655300 | 3.04145000  |
| C  | 4.86319100 | 1.43106700  | -0.15319400 |
| H  | 3.39806900 | -0.25948000 | 3.91965400  |
| H  | 3.27364000 | -1.44950300 | 2.62862600  |
| H  | 4.84013800 | -1.14468400 | 3.41836000  |
| C  | 3.90382600 | 2.12852200  | -0.90269700 |
| C  | 6.20750800 | 1.83179000  | -0.22887000 |
| C  | 4.27960600 | 3.22090200  | -1.69182600 |
| H  | 2.86325000 | 1.80283800  | -0.88526000 |
| C  | 6.58318200 | 2.92388700  | -1.01741100 |
| H  | 6.96251200 | 1.28550400  | 0.34303200  |
| C  | 5.61755900 | 3.62522900  | -1.74850600 |
| H  | 3.51854900 | 3.75080100  | -2.26953800 |
| H  | 7.63270500 | 3.22792100  | -1.05988300 |
| H  | 5.90816000 | 4.48052400  | -2.36461000 |
| N  | 4.54014000 | -0.95769800 | 0.05597500  |
| C  | 4.58582400 | -1.10531600 | -1.40962900 |
| C  | 4.80967300 | -2.27315700 | 0.67781000  |
| H  | 3.59242400 | -1.42942800 | -1.76612000 |
| H  | 4.85243600 | -0.16636700 | -1.90520200 |
| C  | 5.60820400 | -2.21779200 | -1.62026400 |
| H  | 5.58942500 | -2.15432400 | 1.44417300  |
| H  | 3.90909800 | -2.69255800 | 1.14439600  |
| C  | 5.26447200 | -3.18362200 | -0.48091100 |
| H  | 5.53019100 | -2.67914900 | -2.61691700 |
| H  | 6.62894900 | -1.81298400 | -1.50545100 |
| H  | 6.10431600 | -3.83226800 | -0.18811300 |
| H  | 4.41455200 | -3.81395900 | -0.78367200 |
| Br | 1.49555700 | -3.35460800 | -0.93275600 |

### TS3a

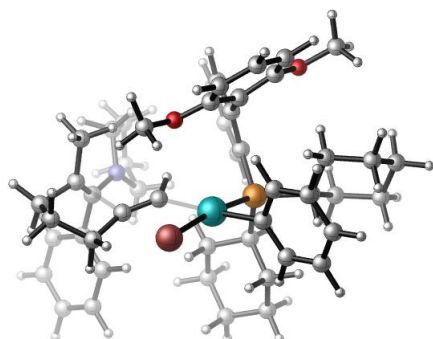

E (SMD(Acetone)/B3LYP-D3/Def2-SVP) = -5190.185161

E (SMD(Acetone)/M06/Def2-TZVPP//SMD(Acetone)/B3LYP-D3/Def2-SVP) = -5191.001946

|                                          |                             |
|------------------------------------------|-----------------------------|
| Zero-point correction=                   | 1.020770 (Hartree/Particle) |
| Thermal correction to Energy=            | 1.076131                    |
| Thermal correction to Enthalpy=          | 1.077075                    |
| Thermal correction to Gibbs Free Energy= | 0.930860                    |

Charge = 0 Multiplicity = 1

|   |             |             |             |
|---|-------------|-------------|-------------|
| C | -0.72181100 | 2.01387200  | 0.18366100  |
| C | 0.07356500  | 2.95914000  | 0.86413700  |
| H | 0.32974500  | 2.80387100  | 1.91061300  |
| C | 0.55867500  | 4.11247100  | 0.24666500  |
| H | 1.17037200  | 4.81481100  | 0.81787000  |
| C | 0.27078200  | 4.34537700  | -1.09758300 |
| H | 0.66272900  | 5.22823700  | -1.60889100 |
| C | -0.54838300 | 3.44646400  | -1.77896500 |
| H | -0.82081500 | 3.64813000  | -2.81778200 |
| C | -1.07873600 | 2.29432500  | -1.16774700 |
| C | -2.10746200 | 1.56967000  | -1.98947900 |
| C | -1.81404700 | 0.47016900  | -2.82413500 |
| C | -2.82282800 | -0.12261700 | -3.60941800 |
| H | -2.60675000 | -0.99234700 | -4.22667800 |
| C | -4.10811100 | 0.41518600  | -3.59872200 |
| H | -4.88988500 | -0.05408100 | -4.20215700 |
| C | -4.41036700 | 1.55340100  | -2.85060900 |
| H | -5.41341600 | 1.97612200  | -2.88090800 |
| C | -3.39898600 | 2.14327700  | -2.07644700 |
| C | -4.87165400 | 3.87910300  | -1.31142200 |
| H | -5.20578600 | 4.21743800  | -2.30784700 |
| C | -0.19291200 | -1.08988900 | -3.62082200 |
| H | -0.78918200 | -1.96754100 | -3.32984300 |
| C | -0.06217500 | 0.41811800  | 2.62305700  |
| H | -0.22432500 | 1.38180500  | 3.13022800  |
| C | -0.48953800 | -0.69709000 | 3.60116900  |
| H | -1.56058900 | -0.63894400 | 3.84254100  |
| H | -0.32525800 | -1.67474900 | 3.11546800  |
| C | 0.32480700  | -0.62508400 | 4.90185900  |
| H | 0.07611000  | 0.31598700  | 5.42638800  |
| H | 0.02213000  | -1.44771200 | 5.57207400  |
| C | 1.83462800  | -0.67326100 | 4.64323800  |
| H | 2.10098500  | -1.66770300 | 4.23931700  |
| H | 2.39041100  | -0.55679500 | 5.58944900  |
| C | 2.25543800  | 0.39742500  | 3.63159700  |
| H | 3.33008300  | 0.30967900  | 3.40238100  |
| H | 2.10544800  | 1.40198200  | 4.06920800  |
| C | 1.44075400  | 0.27739700  | 2.33884000  |
| H | 1.61896800  | -0.70958000 | 1.88799600  |
| H | 1.78155300  | 1.01504000  | 1.60300300  |
| C | -2.84748200 | 0.74746600  | 1.87674300  |
| H | -3.05195800 | -0.21302700 | 2.37588700  |
| C | -2.88125300 | 1.86977900  | 2.93225000  |
| H | -2.64219500 | 2.83203500  | 2.44457900  |
| H | -2.12635100 | 1.71360300  | 3.71594500  |
| C | -4.26570400 | 1.95597600  | 3.59559400  |
| H | -4.43822700 | 1.02855600  | 4.17240200  |
| H | -4.27475900 | 2.78525200  | 4.32378400  |

|    |             |             |             |
|----|-------------|-------------|-------------|
| C  | -5.39482700 | 2.12641900  | 2.57411800  |
| H  | -5.29017100 | 3.10986700  | 2.07857000  |
| H  | -6.37434800 | 2.13007100  | 3.08256400  |
| C  | -5.33698900 | 1.02758700  | 1.50847100  |
| H  | -6.11210600 | 1.19147100  | 0.74009900  |
| H  | -5.55240600 | 0.04672900  | 1.97035600  |
| C  | -3.95557600 | 0.98814500  | 0.84573000  |
| H  | -3.76904600 | 1.95987900  | 0.37458500  |
| H  | -3.92990800 | 0.22950400  | 0.05550800  |
| O  | -3.58531500 | 3.28473800  | -1.36382900 |
| O  | -0.53099800 | 0.05252200  | -2.84698400 |
| P  | -1.16656700 | 0.44005000  | 1.09430300  |
| C  | -2.64200300 | -2.20186900 | 0.39392400  |
| C  | -2.97011600 | -2.75065100 | 1.64711500  |
| C  | -3.65322600 | -2.17952100 | -0.58585900 |
| C  | -4.25515300 | -3.24566800 | 1.91686300  |
| H  | -2.21760800 | -2.79542800 | 2.43870700  |
| C  | -4.93956400 | -2.66759500 | -0.32263800 |
| H  | -3.44143800 | -1.76507200 | -1.57443300 |
| C  | -5.25102500 | -3.20119300 | 0.93459000  |
| H  | -4.47788300 | -3.66444500 | 2.90384100  |
| H  | -5.70431900 | -2.62581500 | -1.10527600 |
| H  | -6.25548900 | -3.58039900 | 1.14420200  |
| H  | -0.30955900 | -0.88634700 | -4.70020600 |
| H  | 0.85338500  | -1.31169400 | -3.39527800 |
| H  | -4.78072400 | 4.75188800  | -0.65029500 |
| H  | -5.62509400 | 3.18931900  | -0.89352400 |
| Pd | -0.76946400 | -1.52167000 | -0.06685300 |
| C  | 1.24182100  | -0.71196300 | -0.64726900 |
| C  | 2.27728400  | -1.39355800 | -0.98209100 |
| H  | 1.24388600  | 0.38157400  | -0.67075900 |
| C  | 2.91492400  | -2.70963600 | -1.16384900 |
| C  | 3.79247900  | -2.72717000 | -2.41422100 |
| H  | 2.08283900  | -3.43487900 | -1.22460800 |
| H  | 3.52376700  | -2.96676800 | -0.27939600 |
| C  | 4.71653100  | -1.49944700 | -2.33634400 |
| H  | 4.37499100  | -3.65990600 | -2.47881600 |
| H  | 3.15714200  | -2.67855400 | -3.31451300 |
| C  | 3.90348900  | -0.26258400 | -1.98687100 |
| H  | 5.49493800  | -1.68876400 | -1.58502900 |
| H  | 5.23277000  | -1.34254200 | -3.30019100 |
| C  | 4.22568600  | 0.49415700  | -0.84672200 |
| C  | 3.11439000  | 0.29592800  | -3.15636000 |
| C  | 5.12614000  | -0.08642500 | 0.20945800  |
| N  | 3.79641600  | 1.76341100  | -0.60957000 |
| H  | 2.75719400  | -0.52935200 | -3.78669300 |
| H  | 2.23125200  | 0.86505200  | -2.84274100 |
| H  | 3.73598500  | 0.93665200  | -3.80306000 |
| C  | 4.66917500  | -0.94387600 | 1.21889500  |
| C  | 6.48315900  | 0.28122900  | 0.18890300  |
| C  | 3.93916900  | 2.44450600  | 0.69101600  |
| C  | 3.64097200  | 2.80572300  | -1.65910400 |
| C  | 5.55259500  | -1.43312100 | 2.18714200  |
| H  | 3.61479600  | -1.21201500 | 1.25547300  |

|    |             |             |             |
|----|-------------|-------------|-------------|
| C  | 7.36694400  | -0.21327500 | 1.15197500  |
| H  | 6.84659500  | 0.95460600  | -0.59185400 |
| H  | 2.93471800  | 2.69187300  | 1.07096800  |
| H  | 4.43054100  | 1.80692200  | 1.43144800  |
| H  | 4.30803200  | 2.56733100  | -2.49494500 |
| H  | 2.61042400  | 2.84853200  | -2.03623300 |
| C  | 6.90327500  | -1.07261200 | 2.15534100  |
| H  | 5.17766200  | -2.09525800 | 2.97210500  |
| H  | 8.42122100  | 0.07436000  | 1.11915500  |
| H  | 7.59331700  | -1.45733100 | 2.91100600  |
| C  | 4.70007000  | 3.71928200  | 0.34533700  |
| H  | 4.61813400  | 4.48790300  | 1.12831600  |
| H  | 5.76769100  | 3.48357400  | 0.20066100  |
| C  | 4.04208400  | 4.13388200  | -0.97817700 |
| H  | 4.70568200  | 4.73093800  | -1.62071700 |
| H  | 3.14430400  | 4.73557600  | -0.77613100 |
| Br | -0.43097800 | -3.84969200 | -1.08059200 |



# Copies of $^1\text{H}$ and $^{13}\text{C}\{^1\text{H}\}$ NMR spectra of isolated compounds

## 2-methyl-1-phenylhept-6-yn-1-one

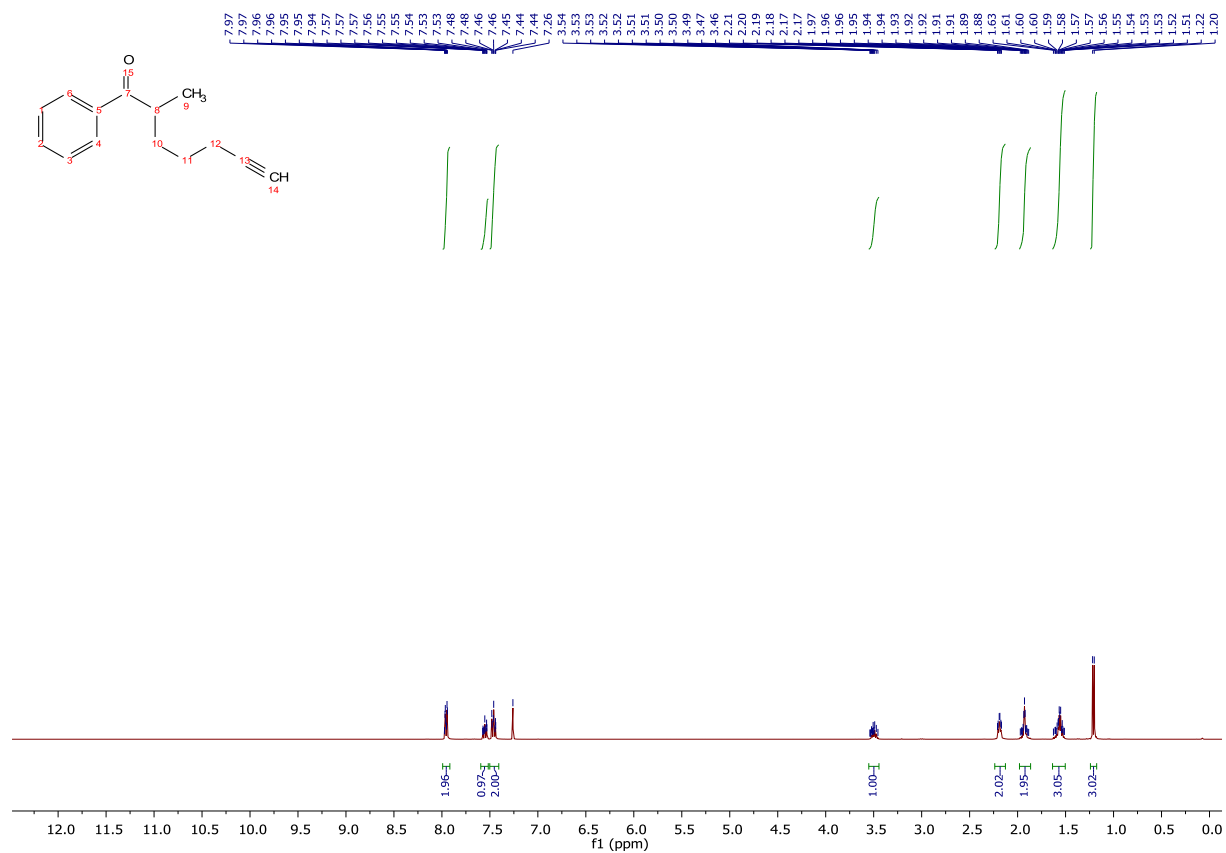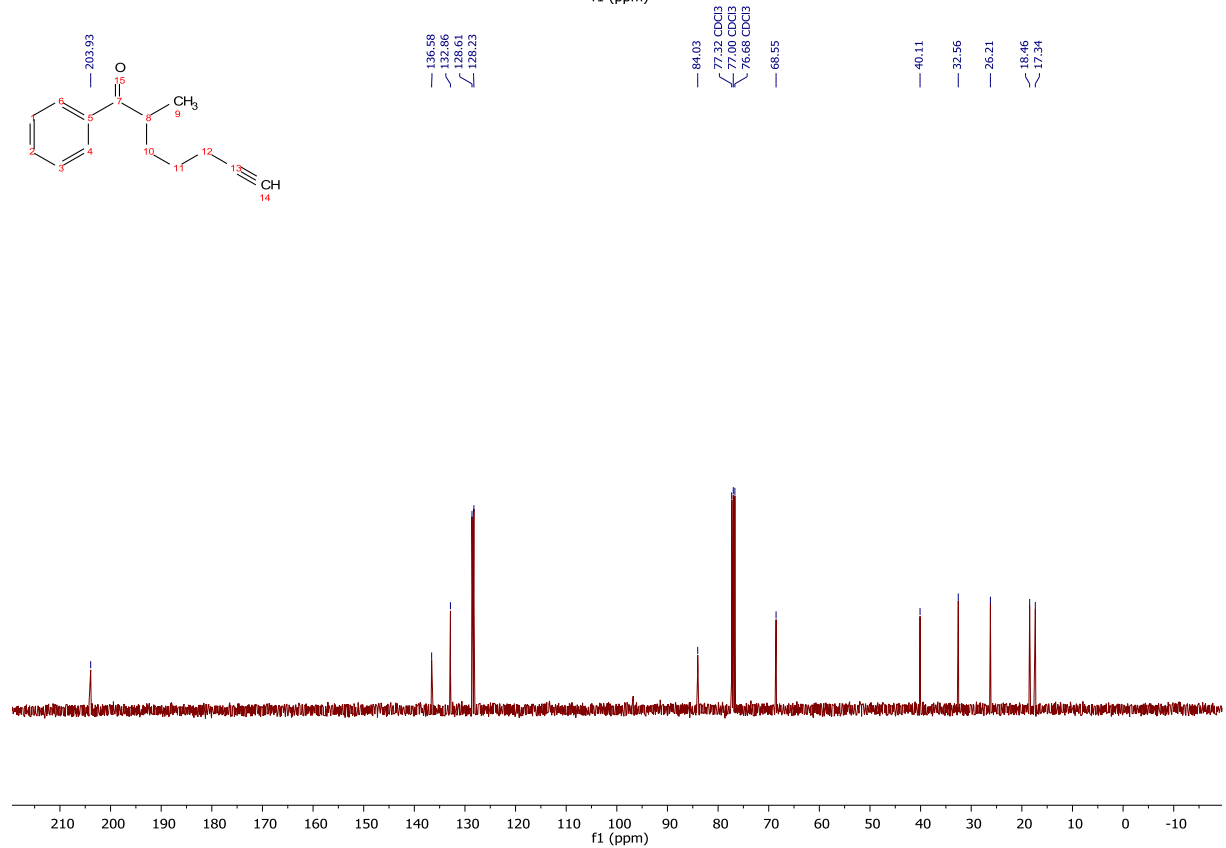

## 2-ethyl-1-phenylhept-6-yn-1-one

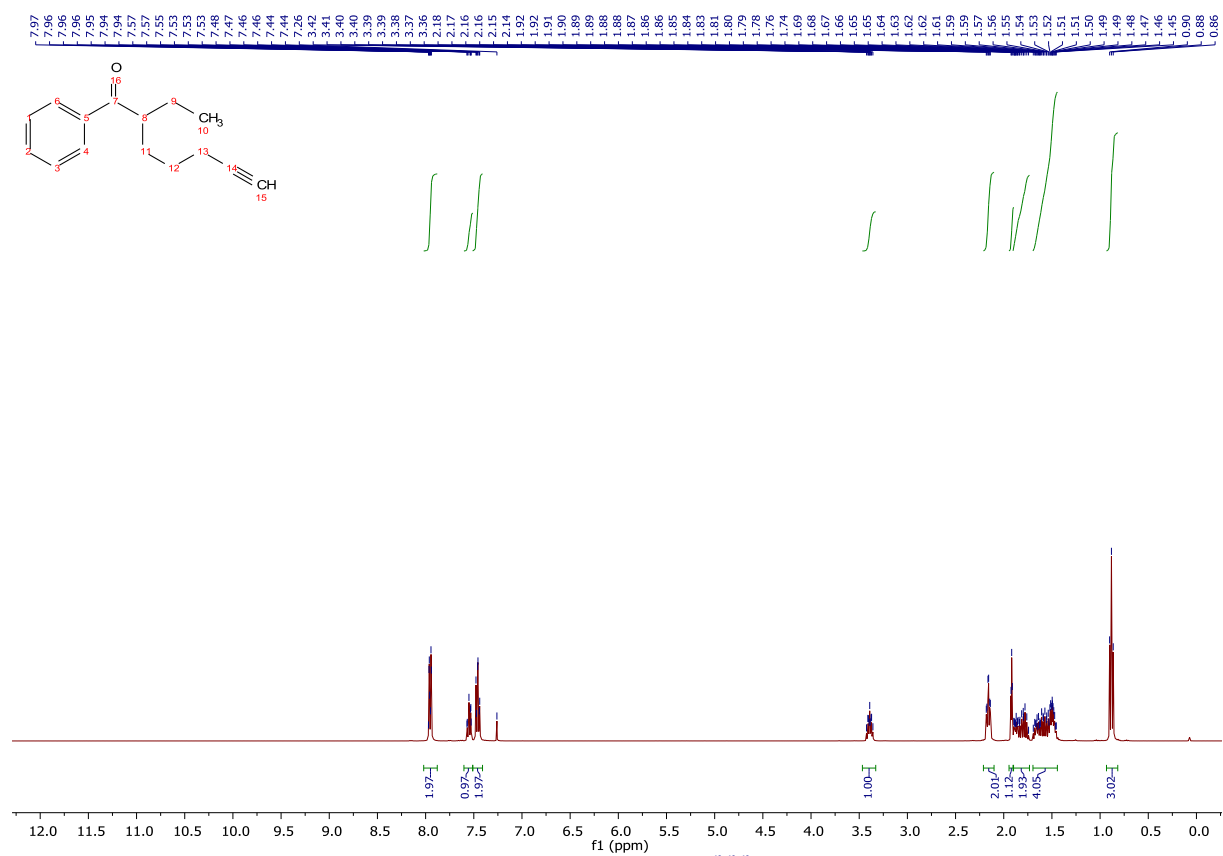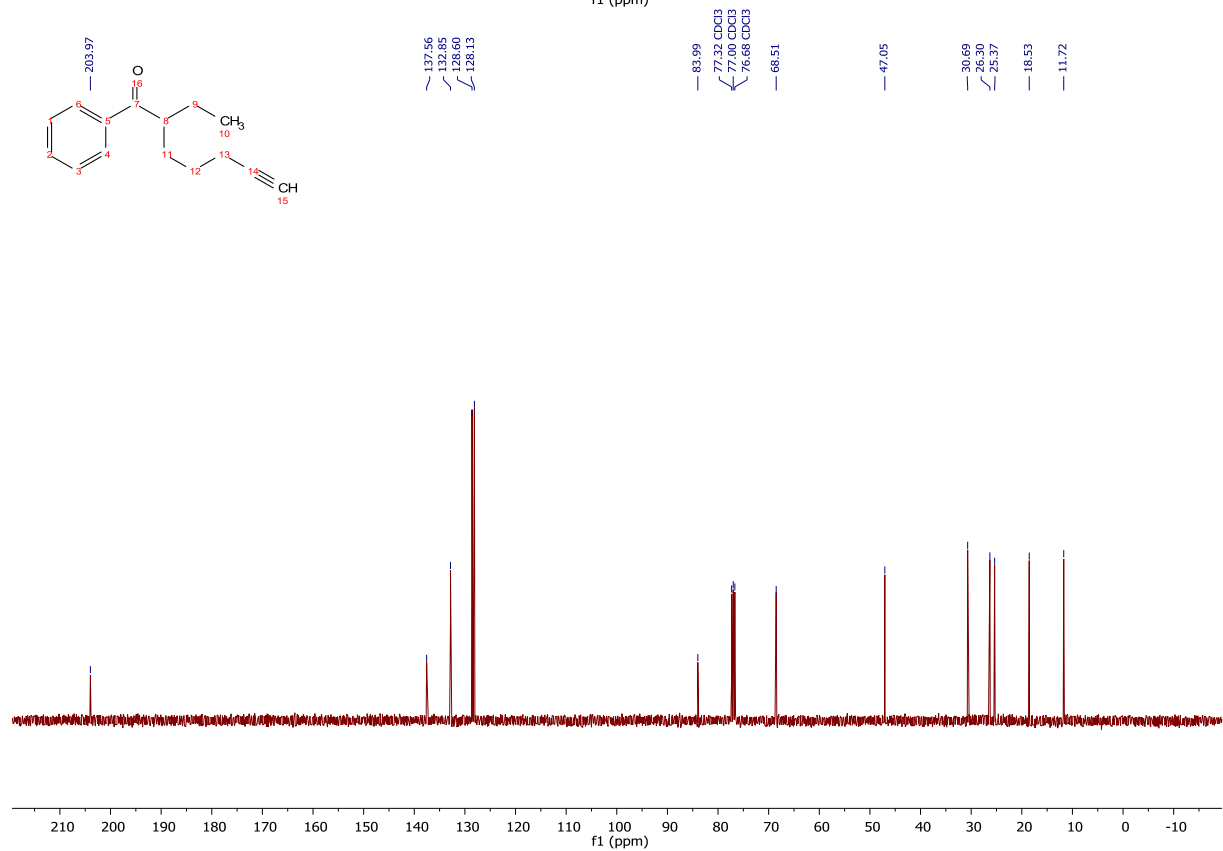

# 1-(4-fluorophenyl)-2-methylhept-6-yn-1-one

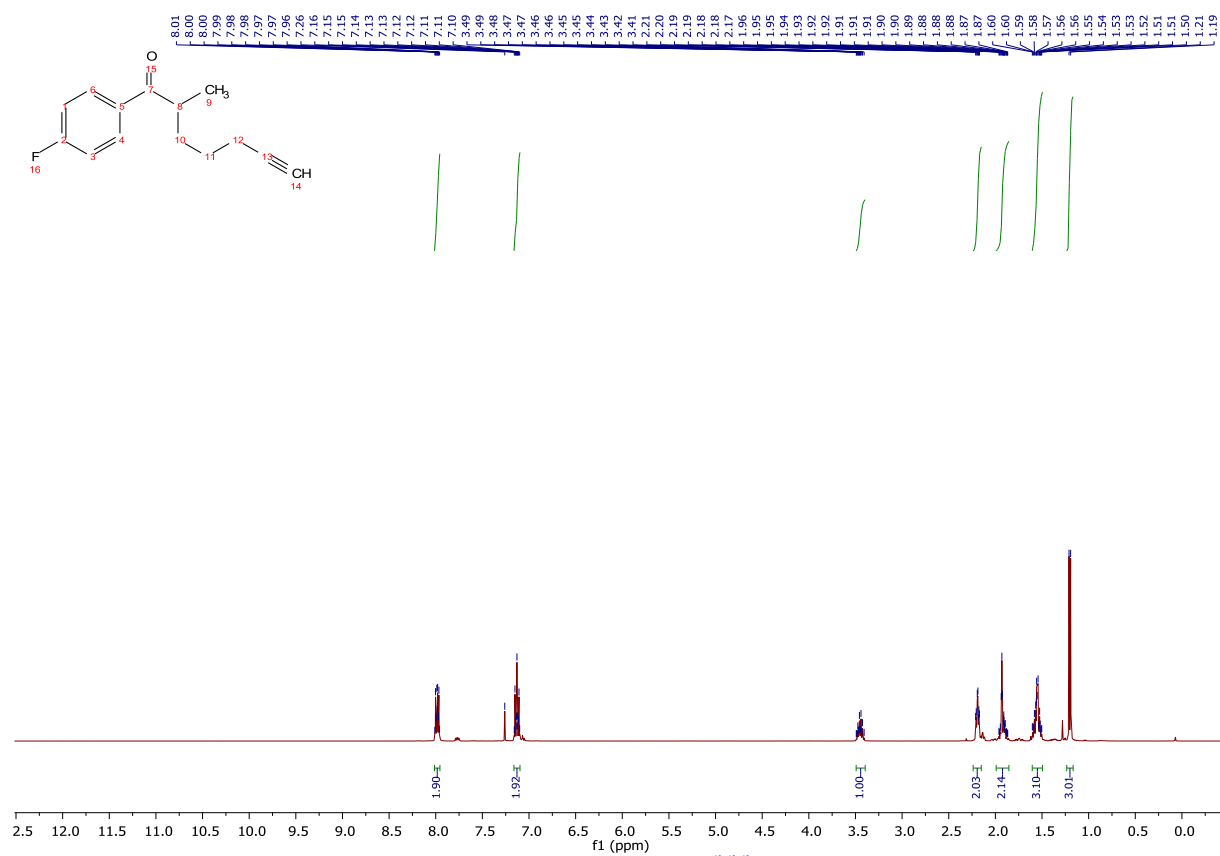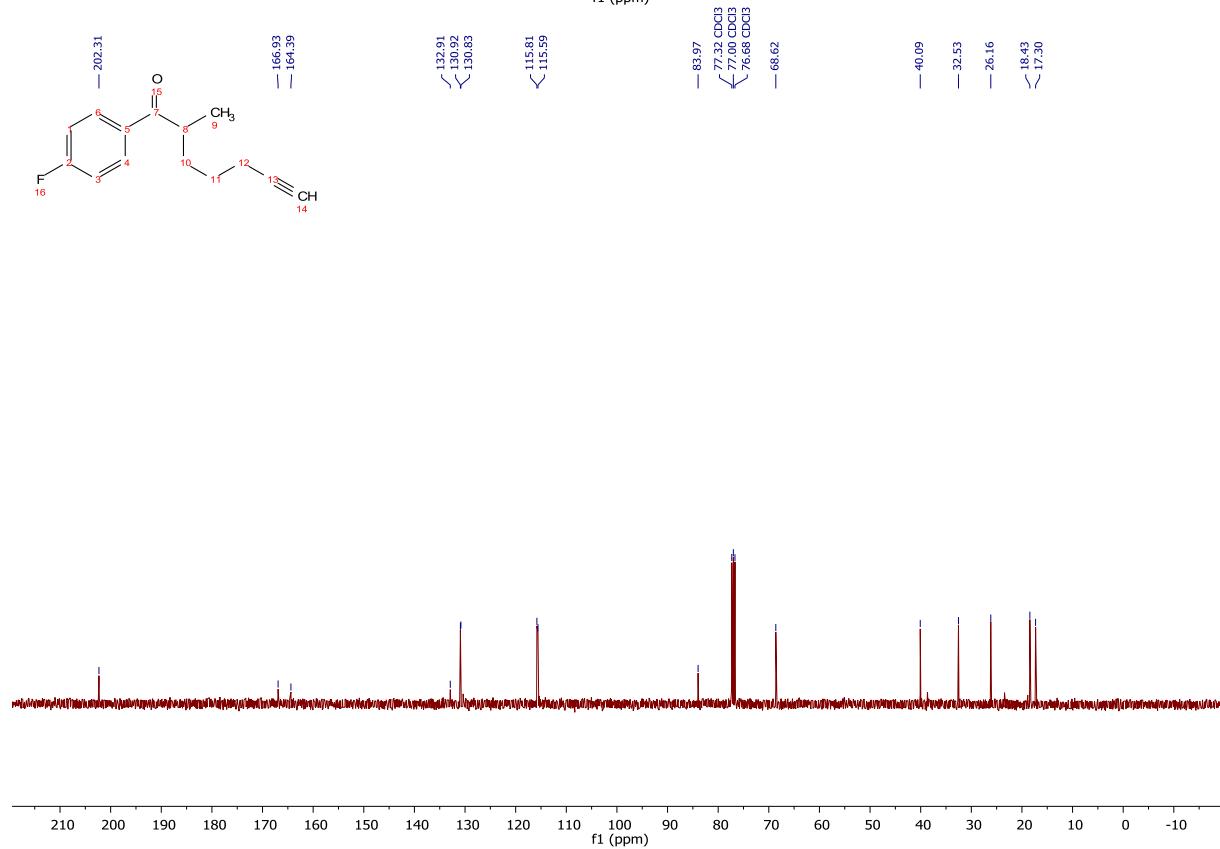

# 2-methyl-1-(p-tolyl)hept-6-yn-1-one

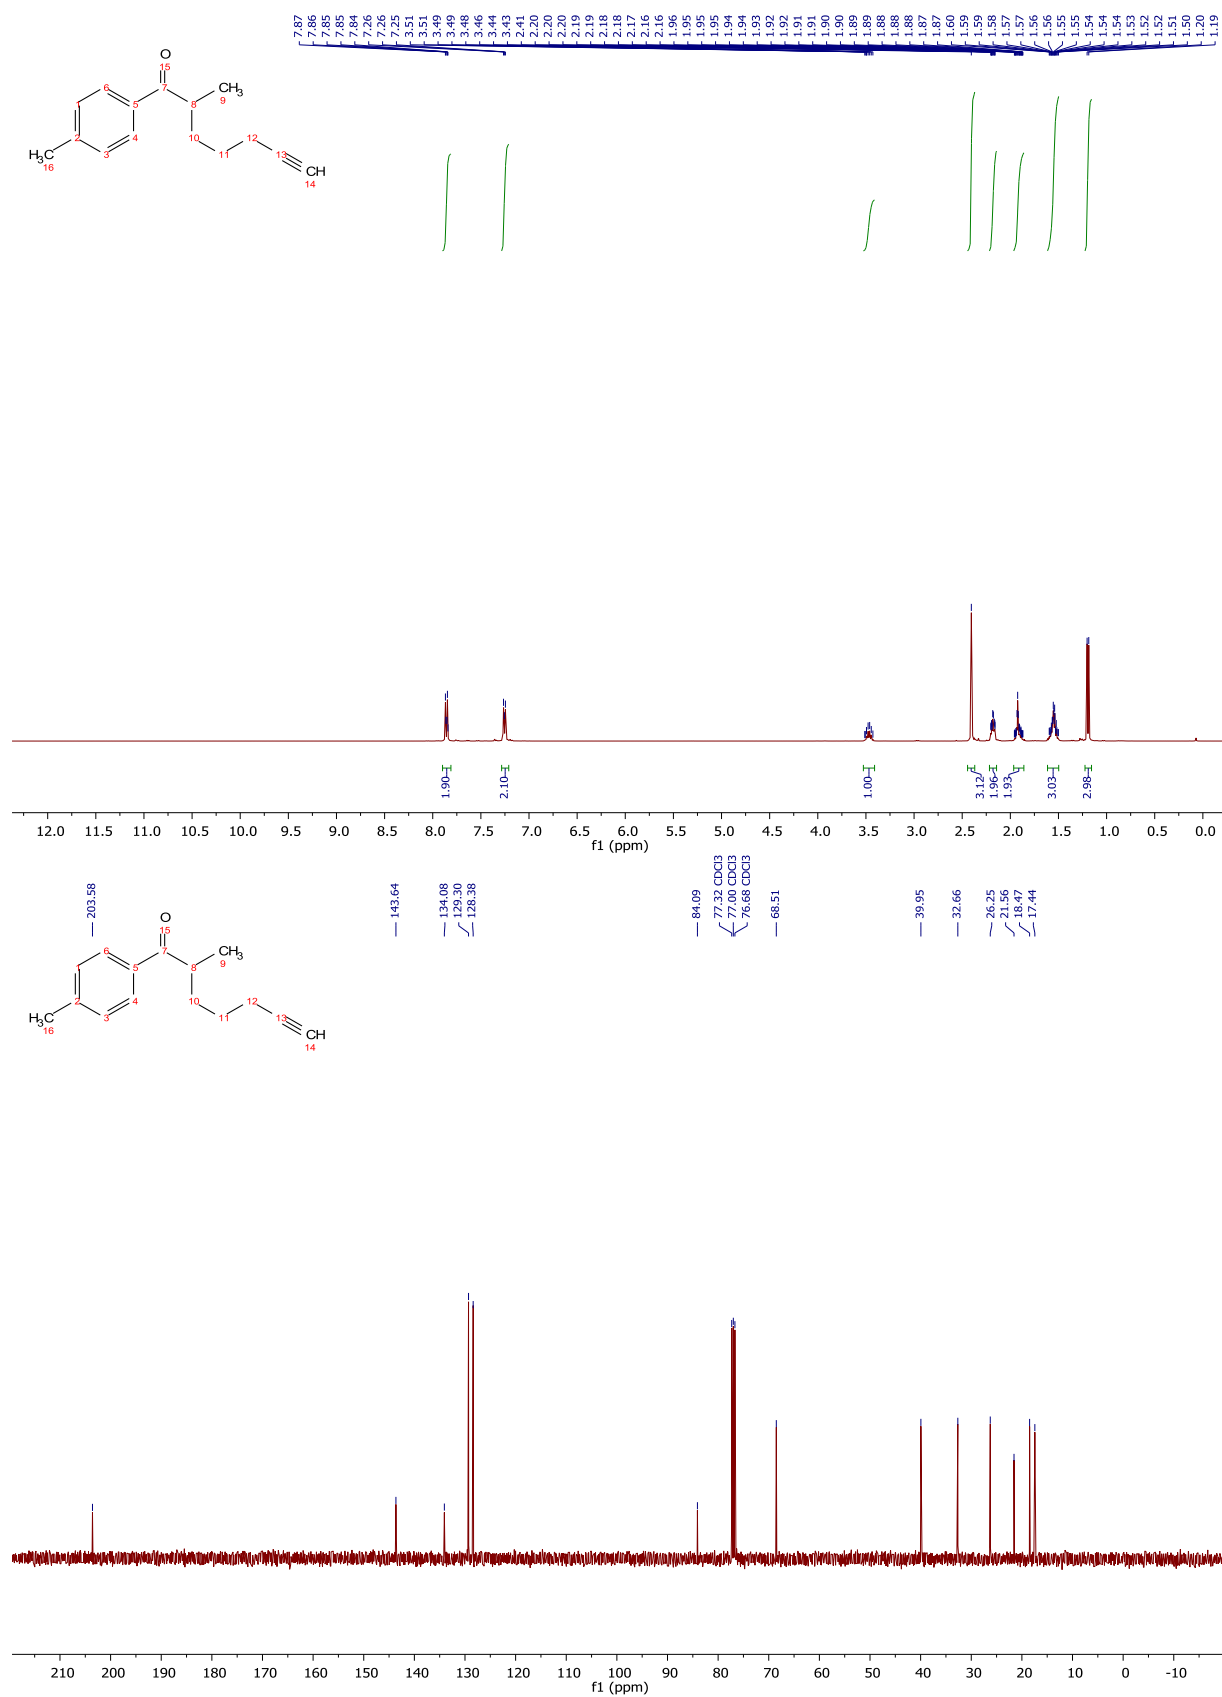

# 1-(4-methoxyphenyl)-2-methylhept-6-yn-1-one

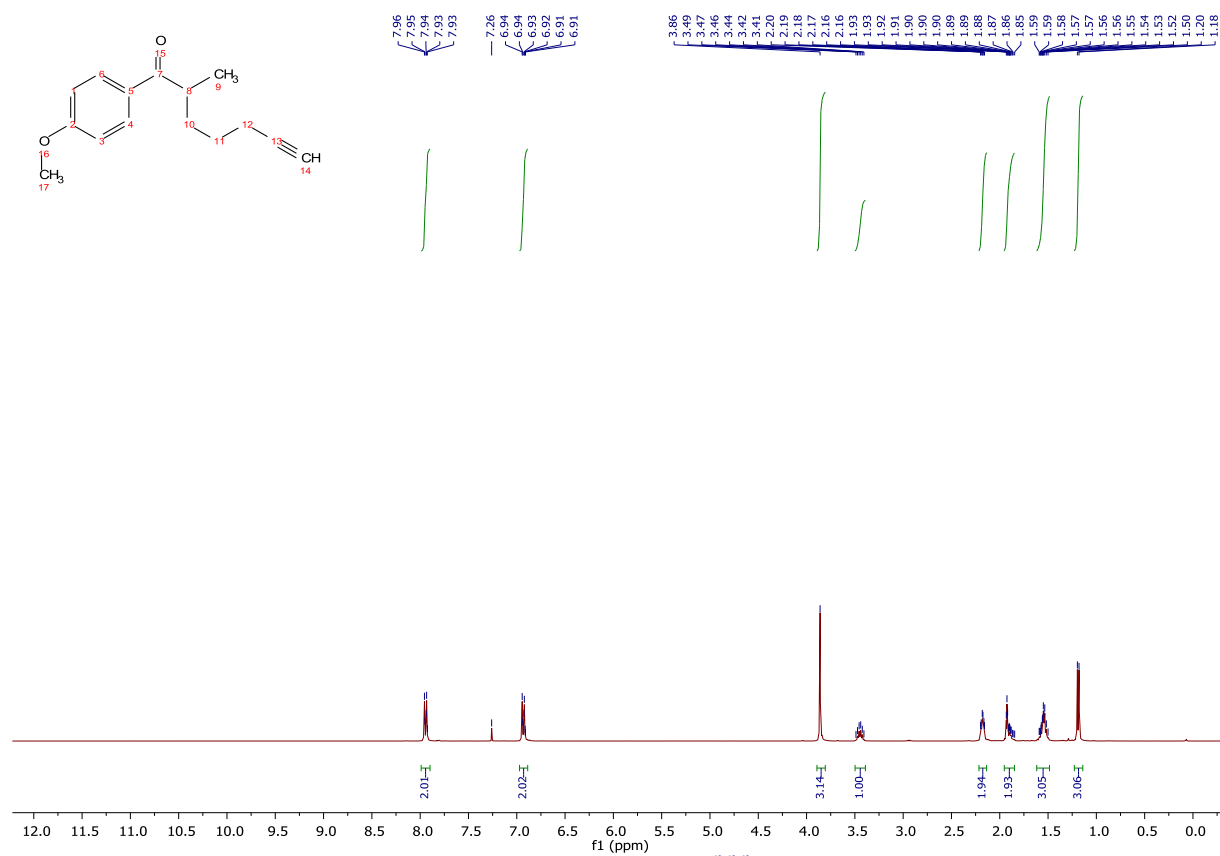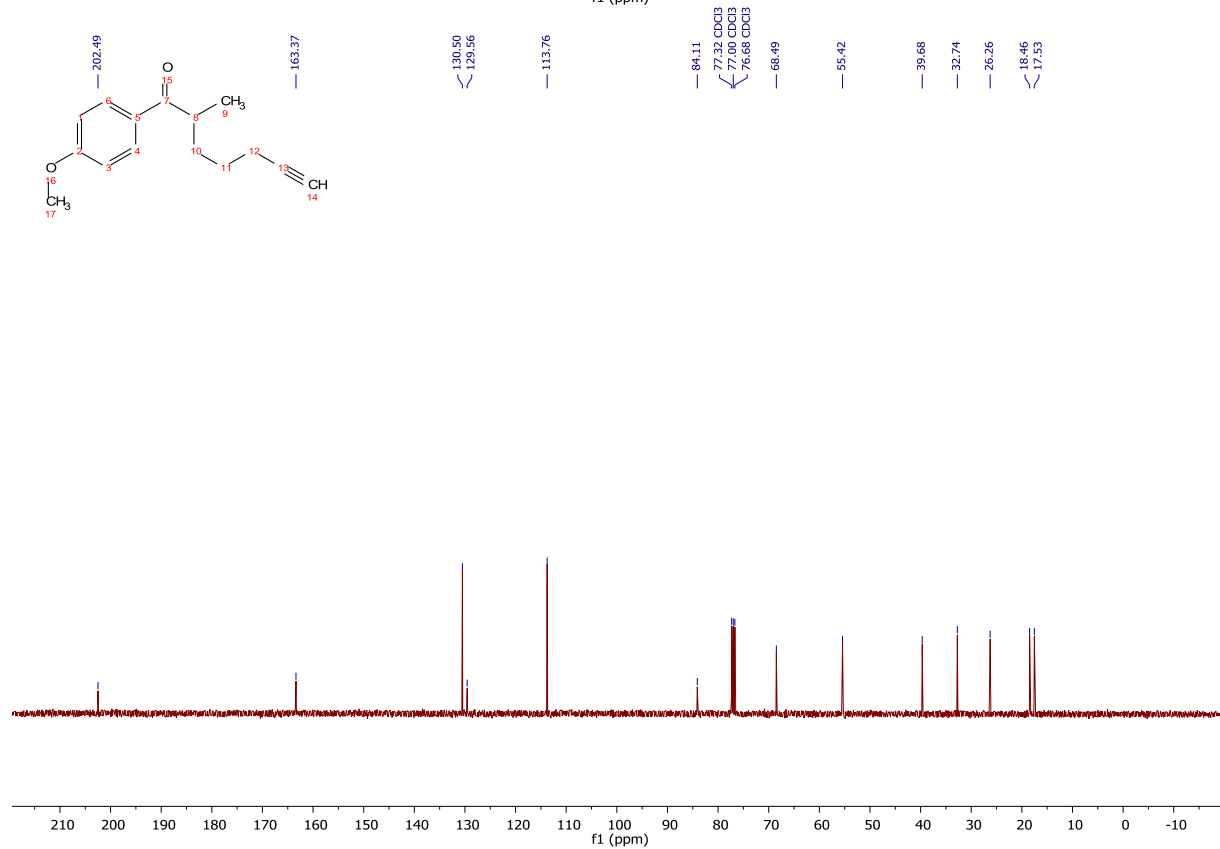

## 2-isopropyl-1-phenylhept-6-yn-1-one

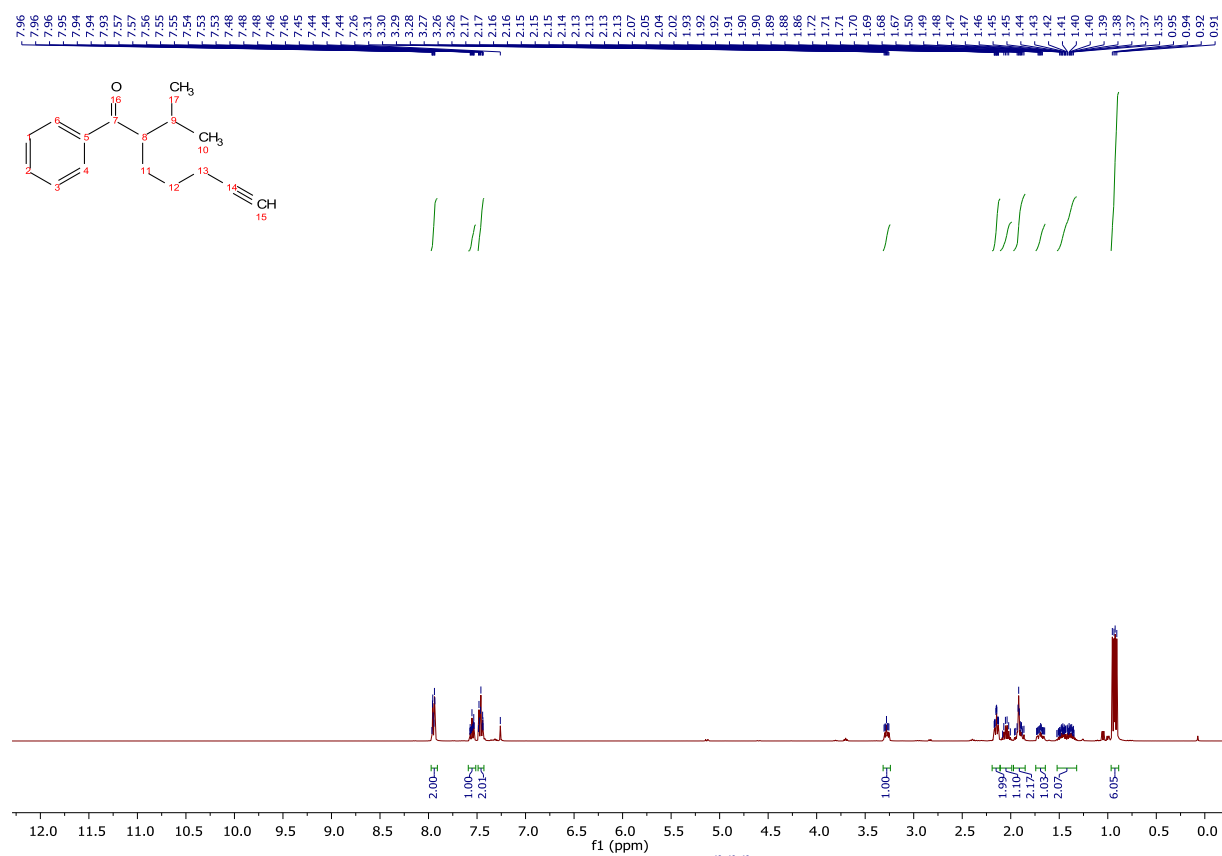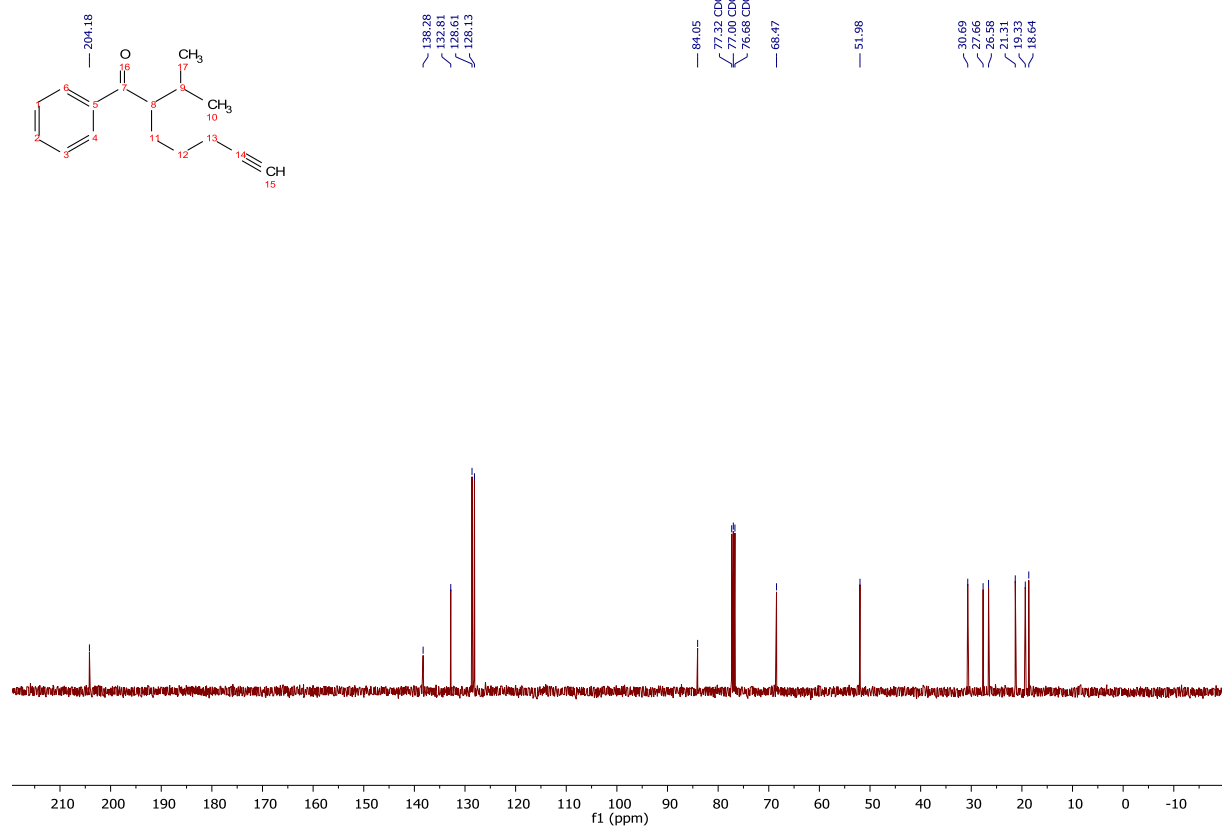

# 2-methoxy-1-phenylhept-6-yn-1-one

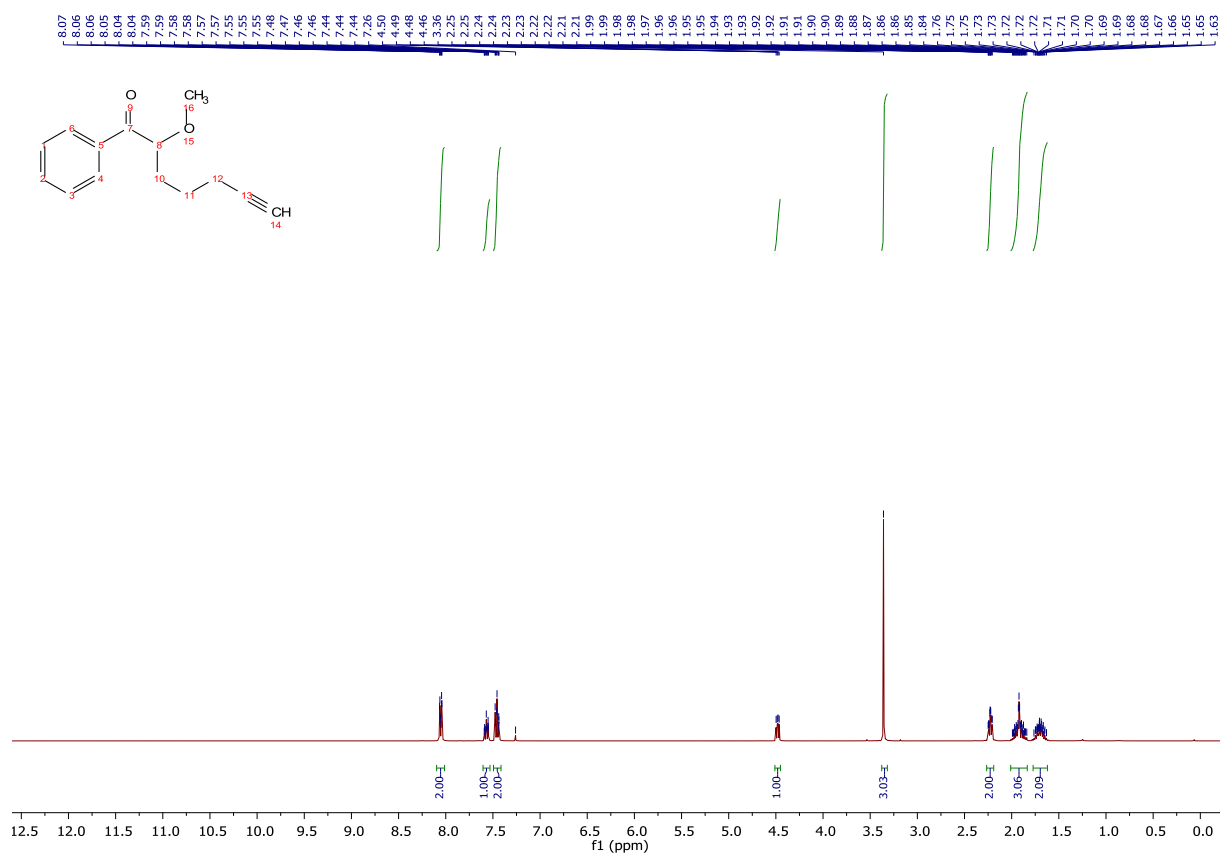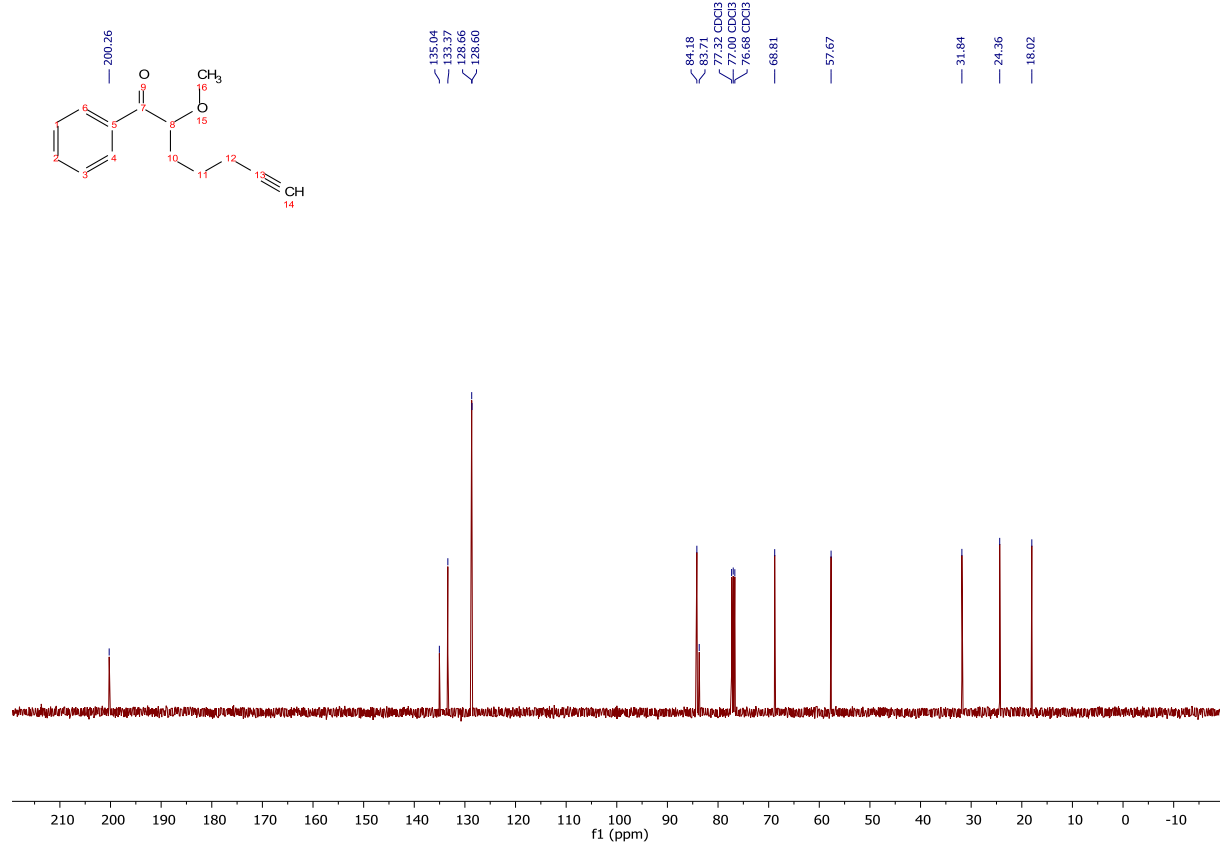

# 1,2-diphenylhept-6-yn-1-one

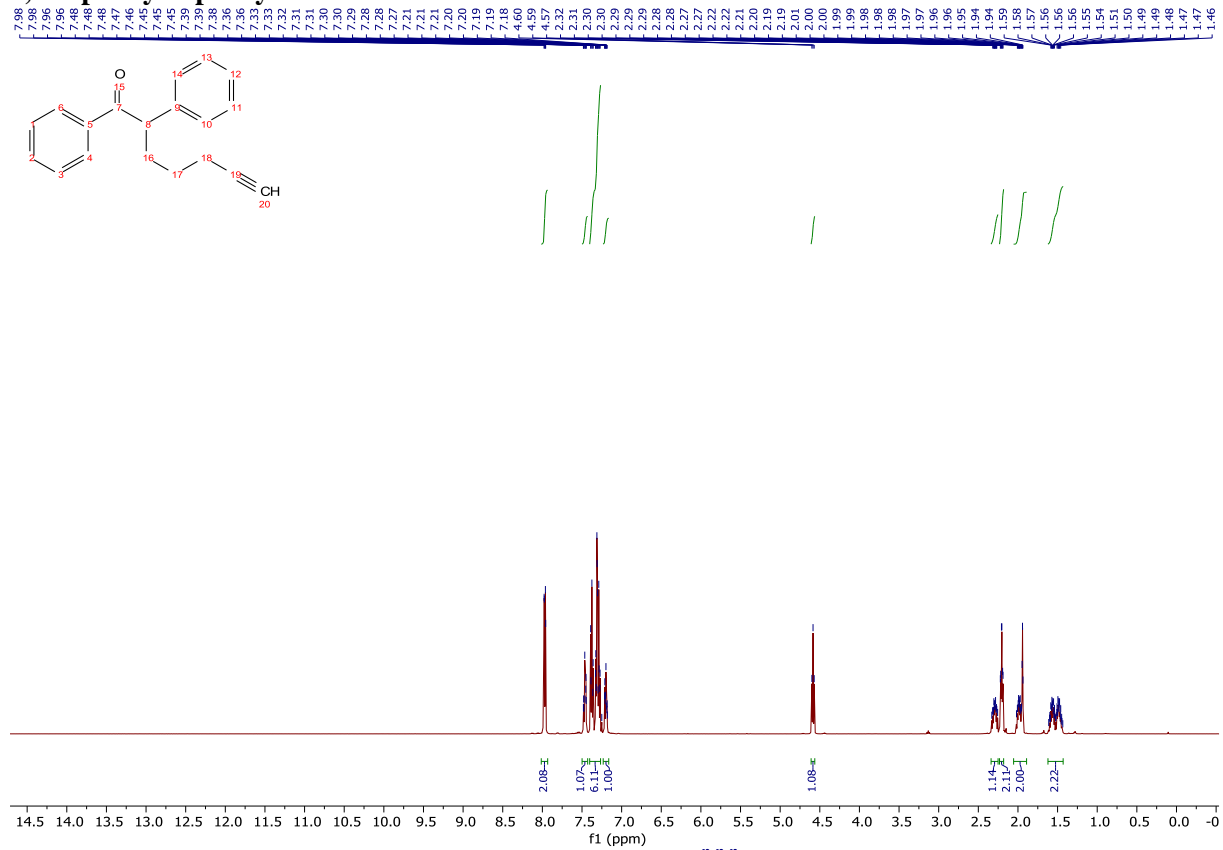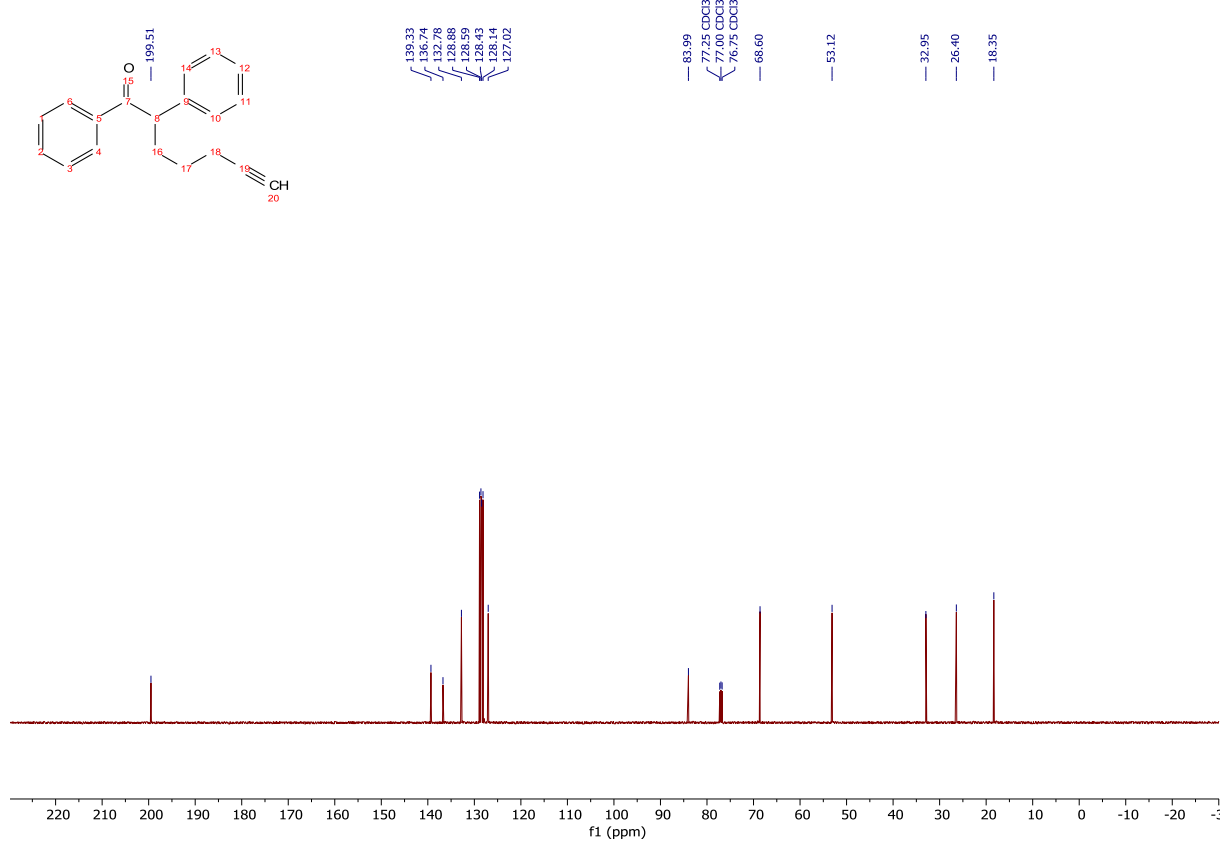



# 1-(2-methyl-1-phenylhept-1-en-6-yn-1-yl)pyrrolidine (3)

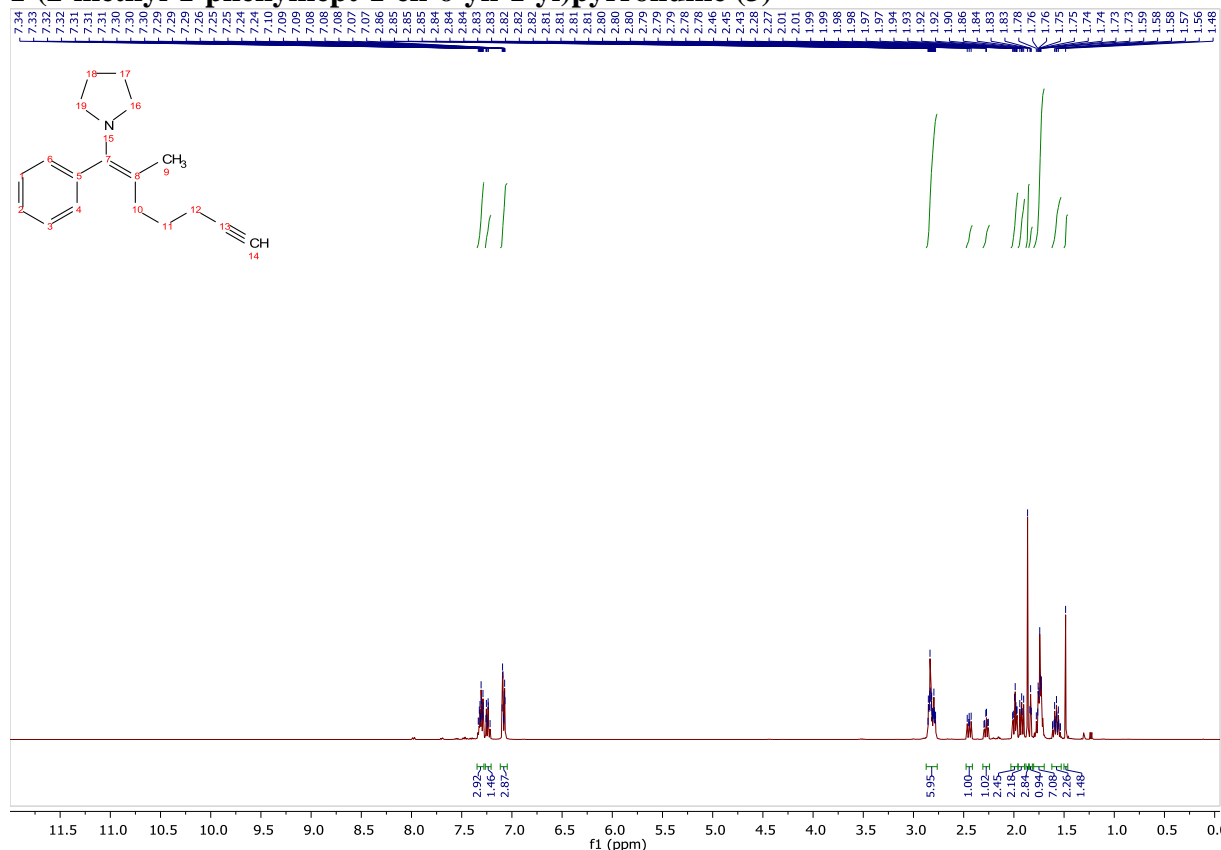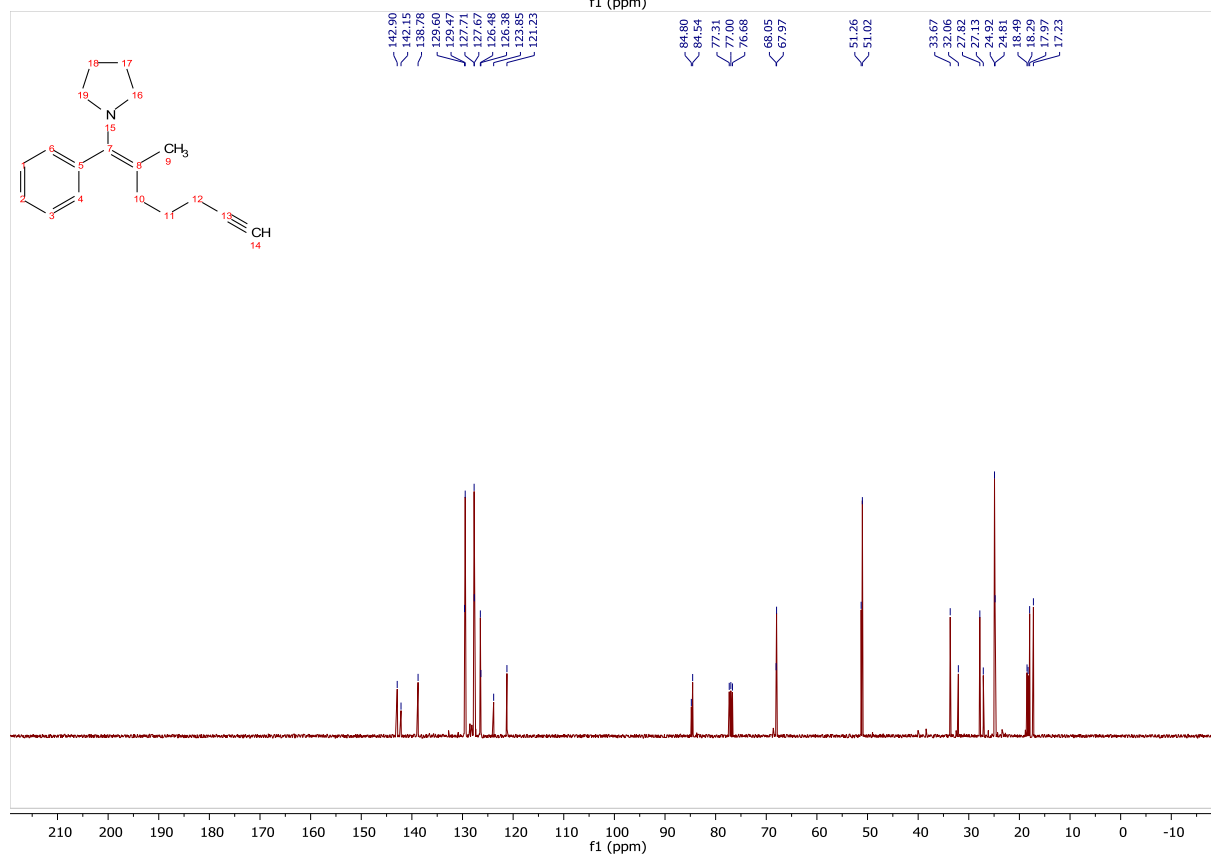

# (E)-(2-benzylidene-1-methylcyclopentyl)(phenyl)methanone (4)

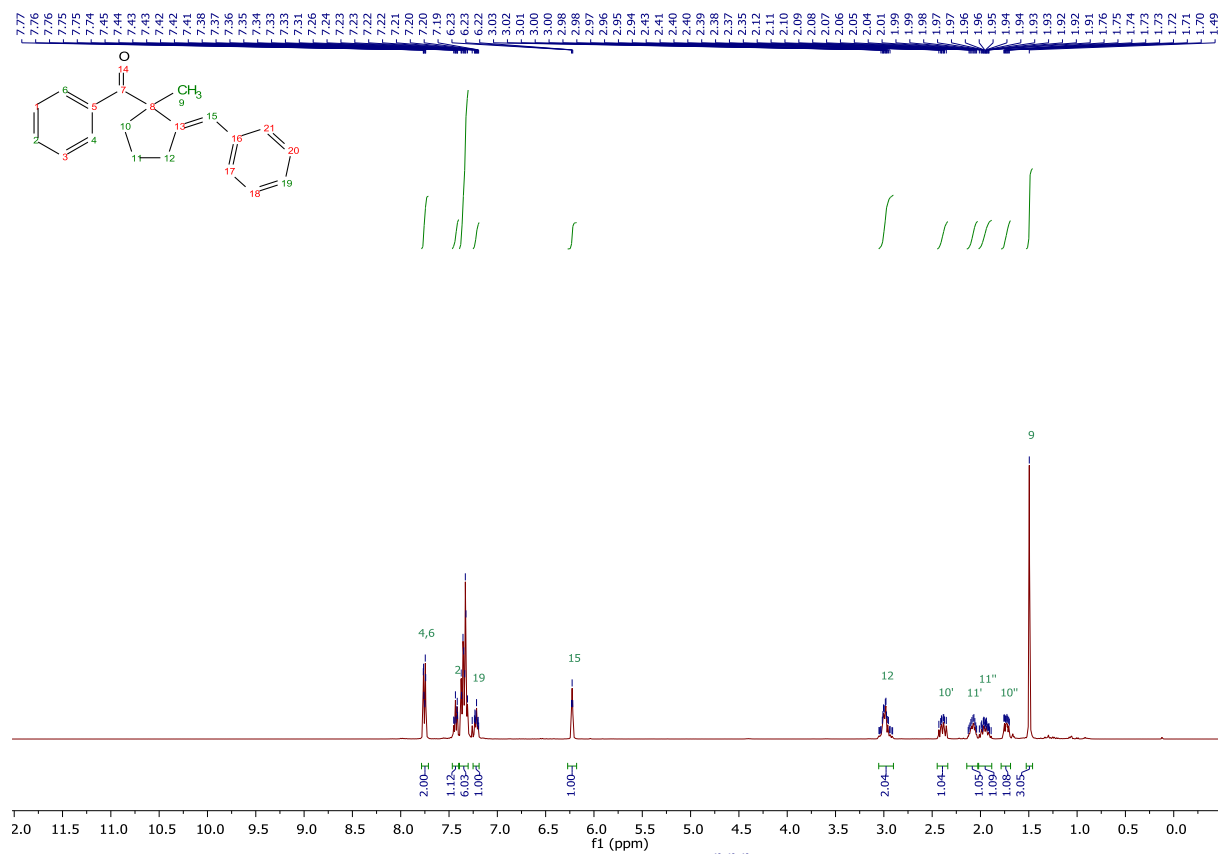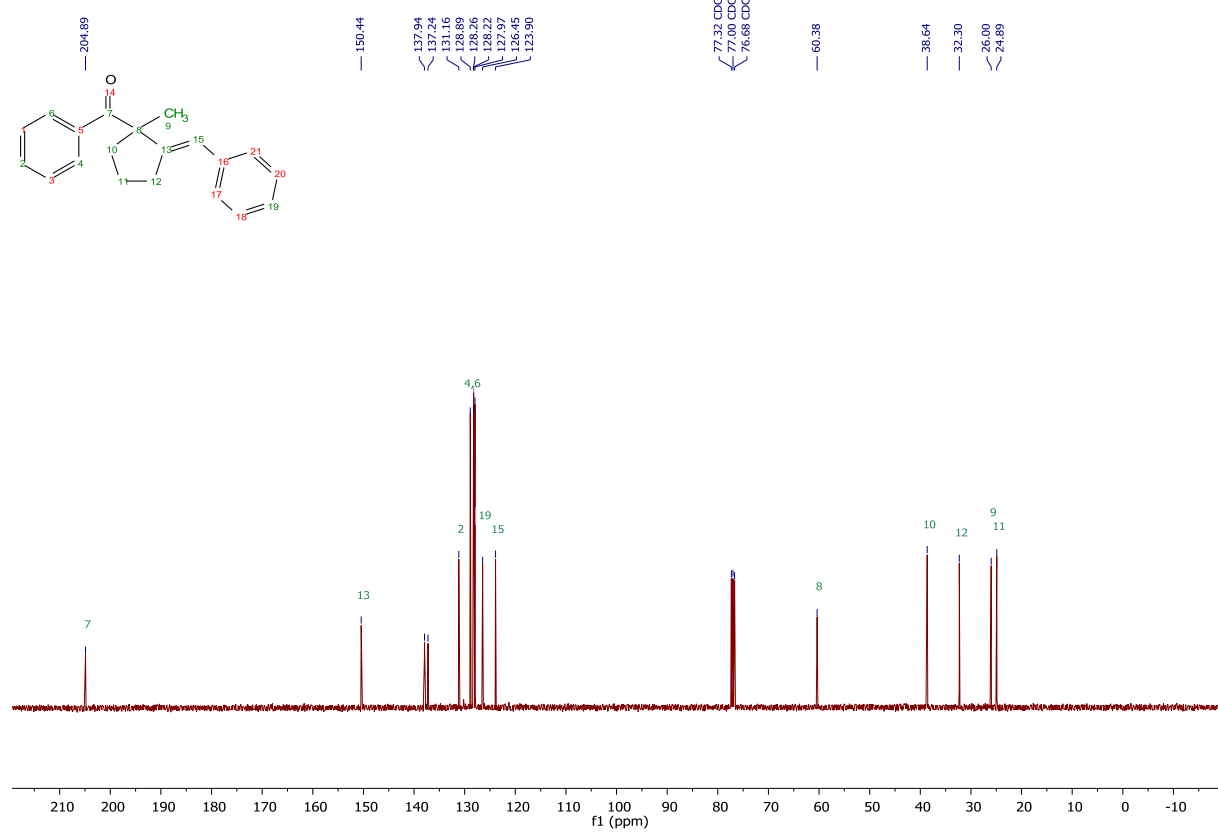

**(E)-1-methyl-2-(naphthalen-2-ylmethylene)cyclopentyl(phenyl)methanone (5)**

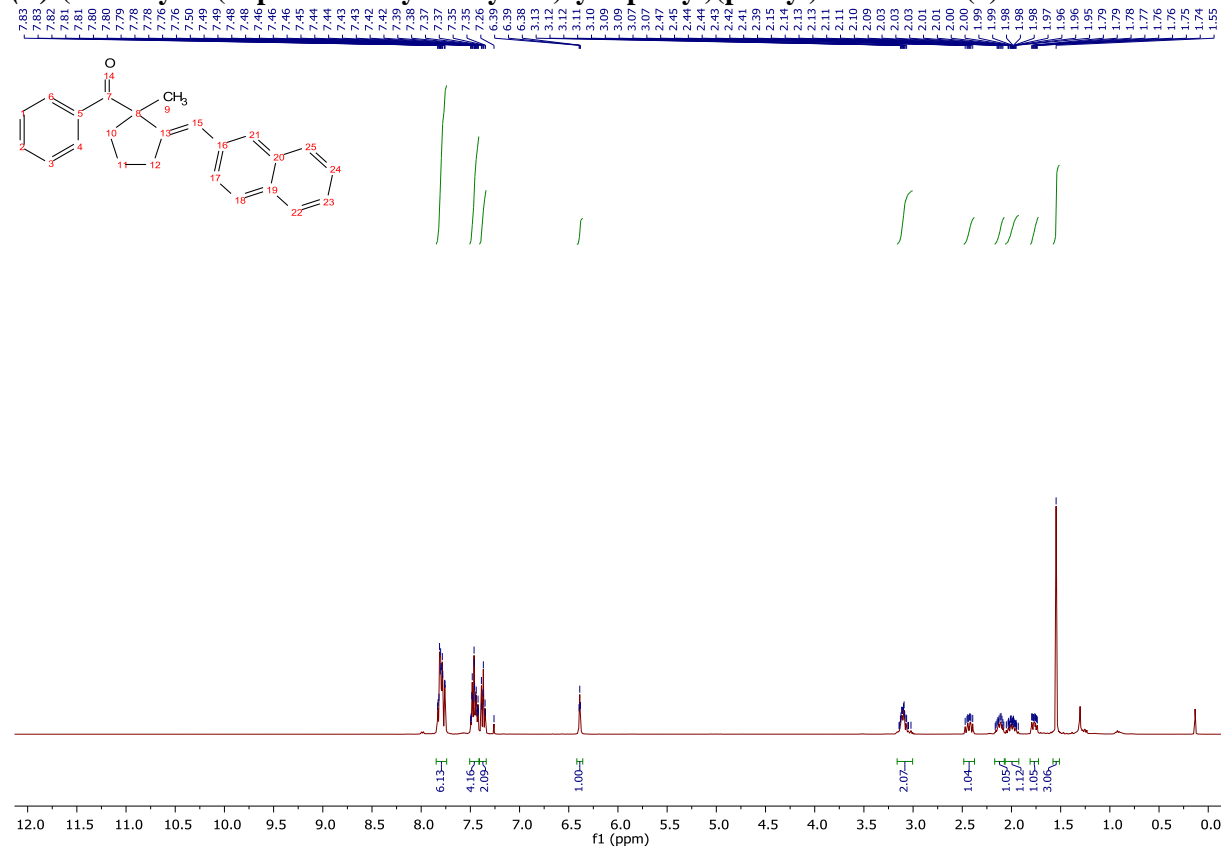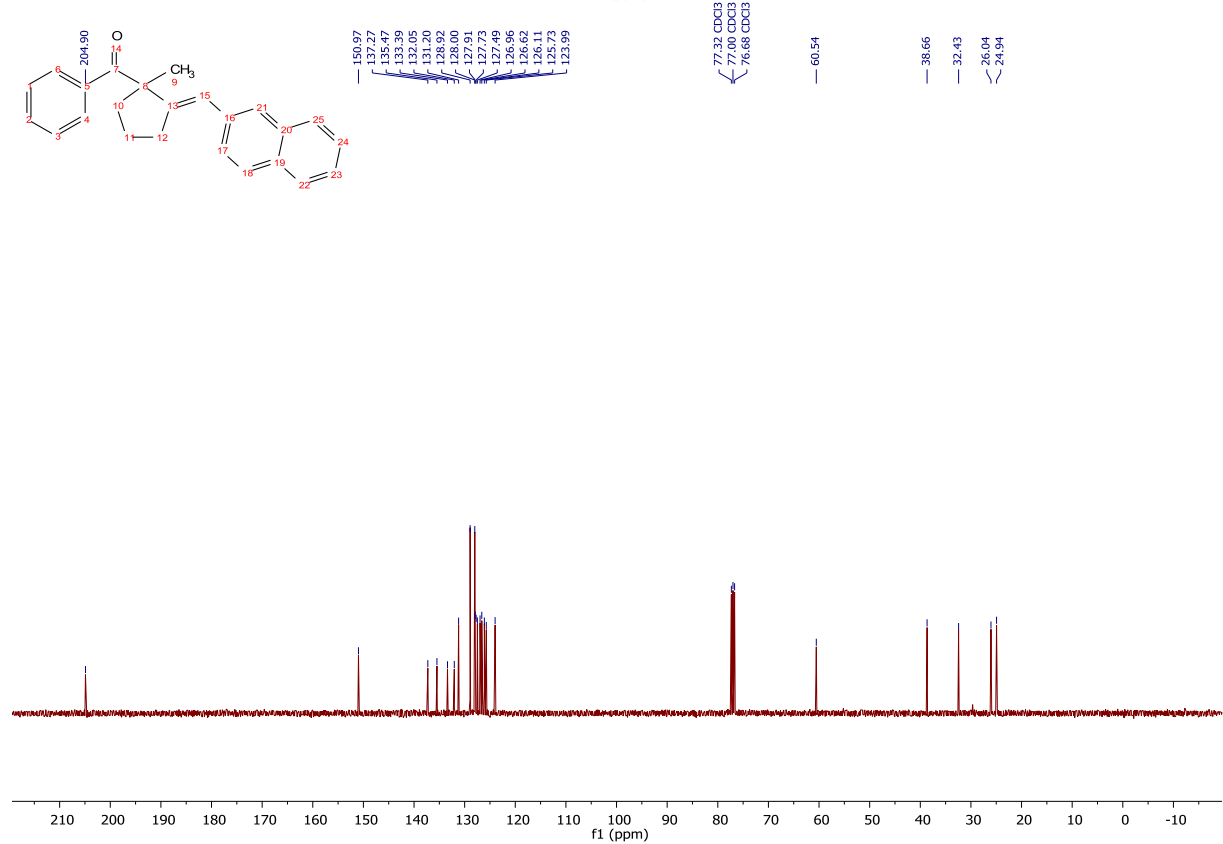

**(E)-(1-methyl-2-(naphthalen-1-ylmethylene)cyclopentyl)(phenyl)methanone (6)**

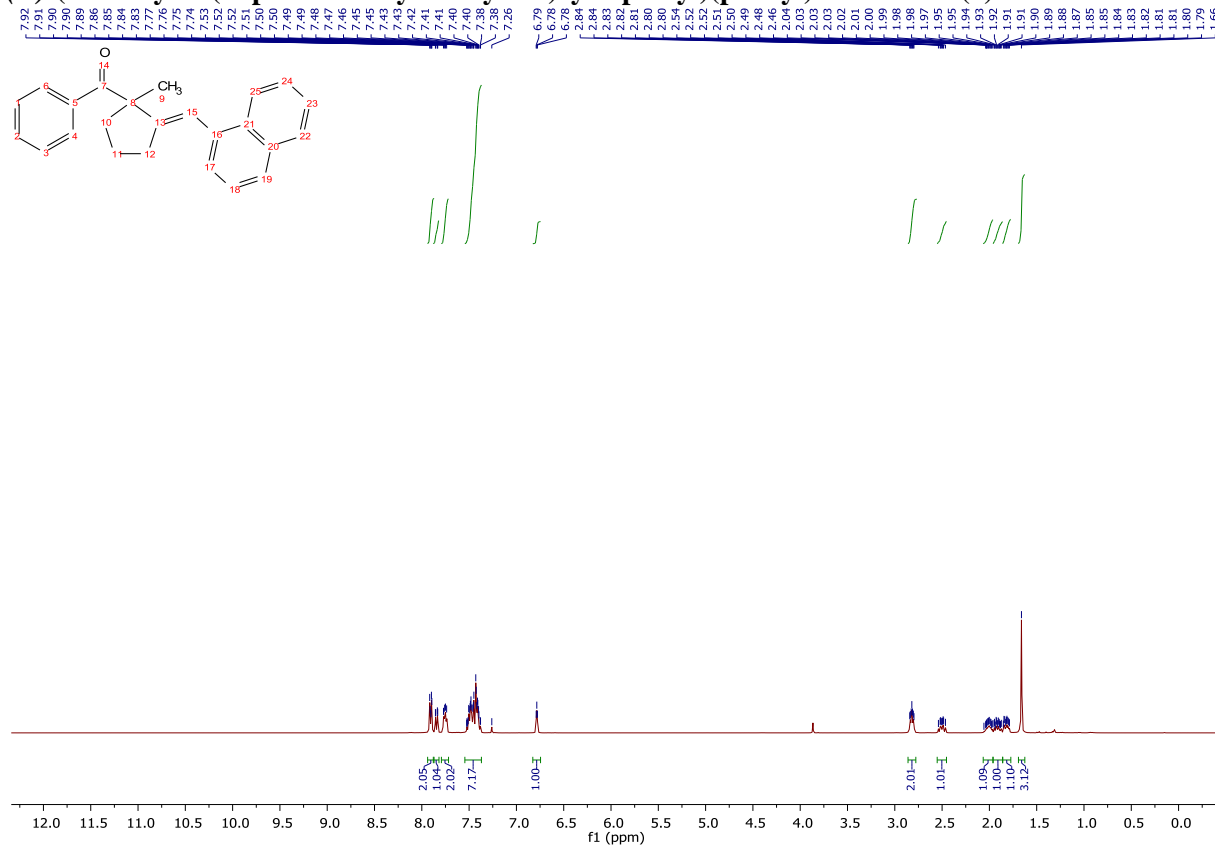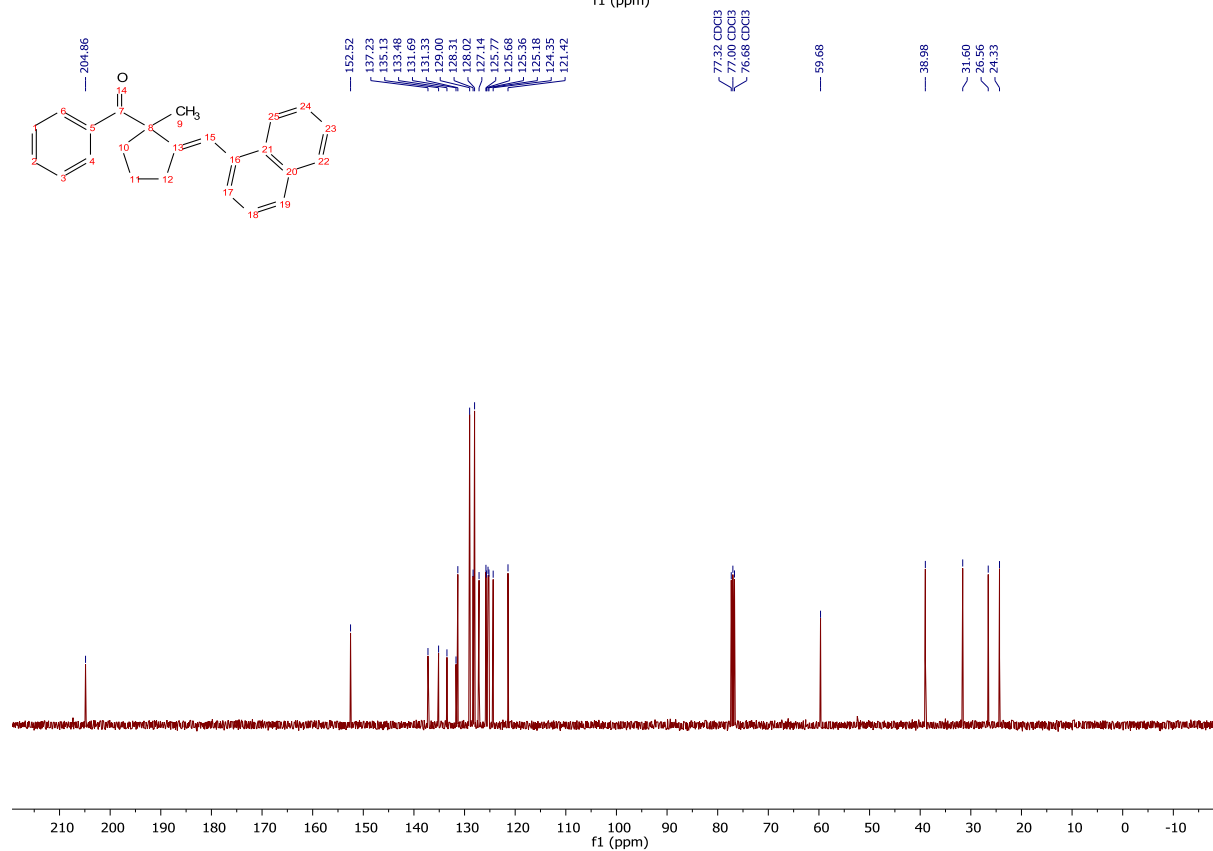

**(E)-2-(4-methoxybenzylidene)-1-methylcyclopentyl(phenyl)methanone (7)**

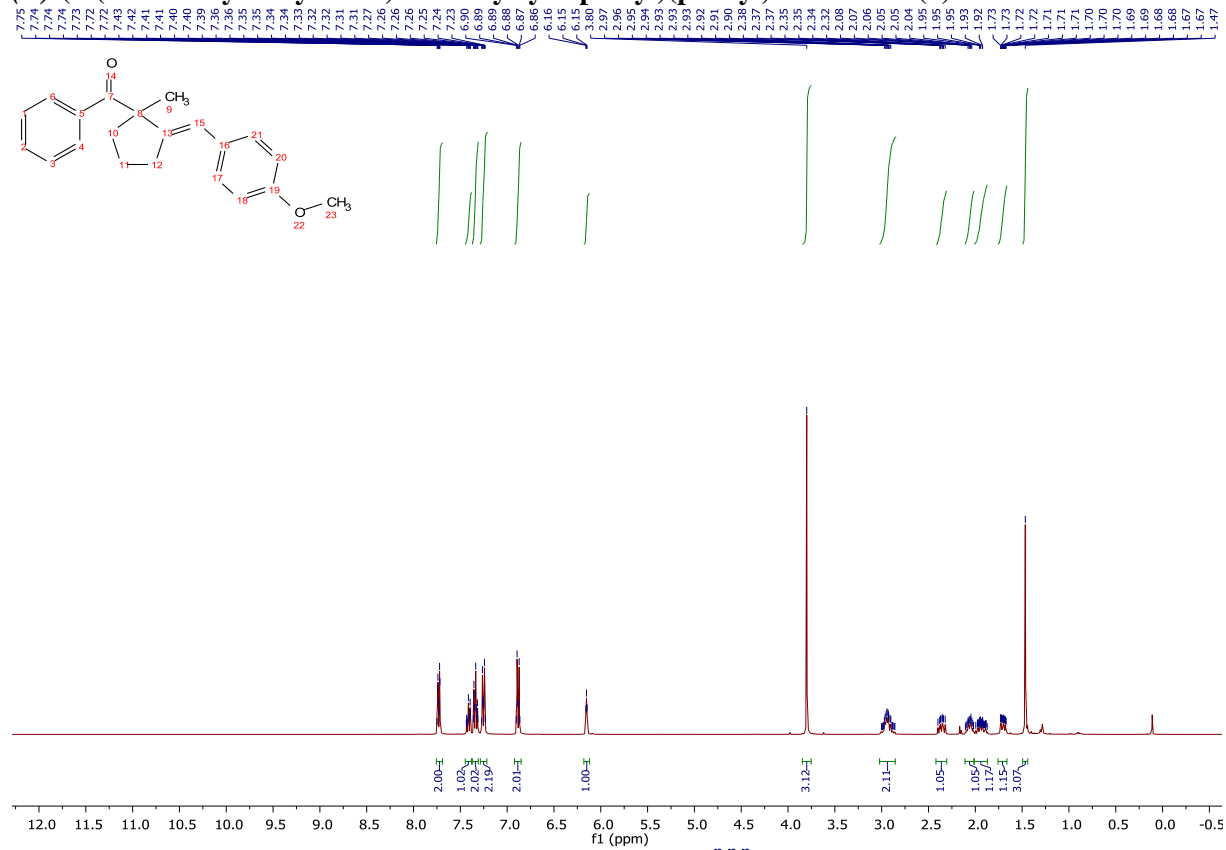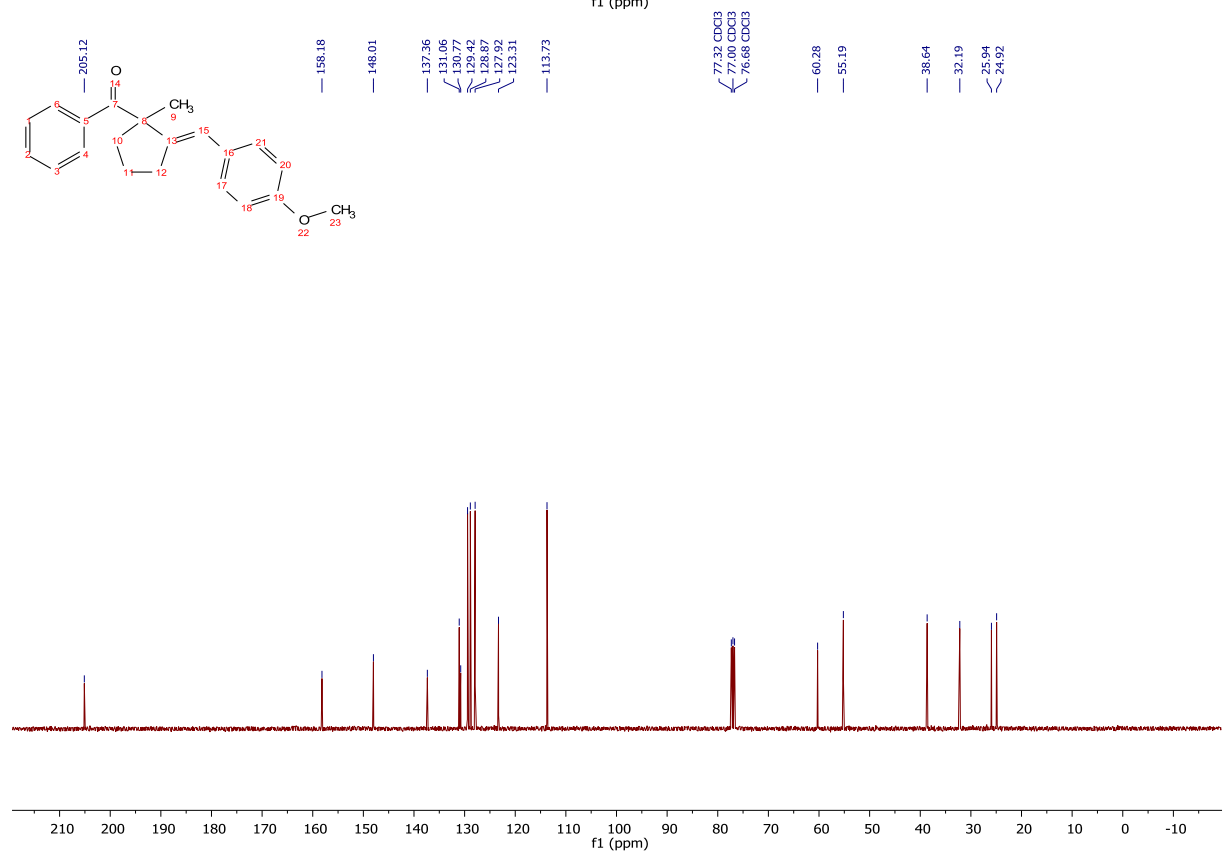

**(E)-2-(3-methoxybenzylidene)-1-methylcyclopentyl(phenyl)methanone (8)**

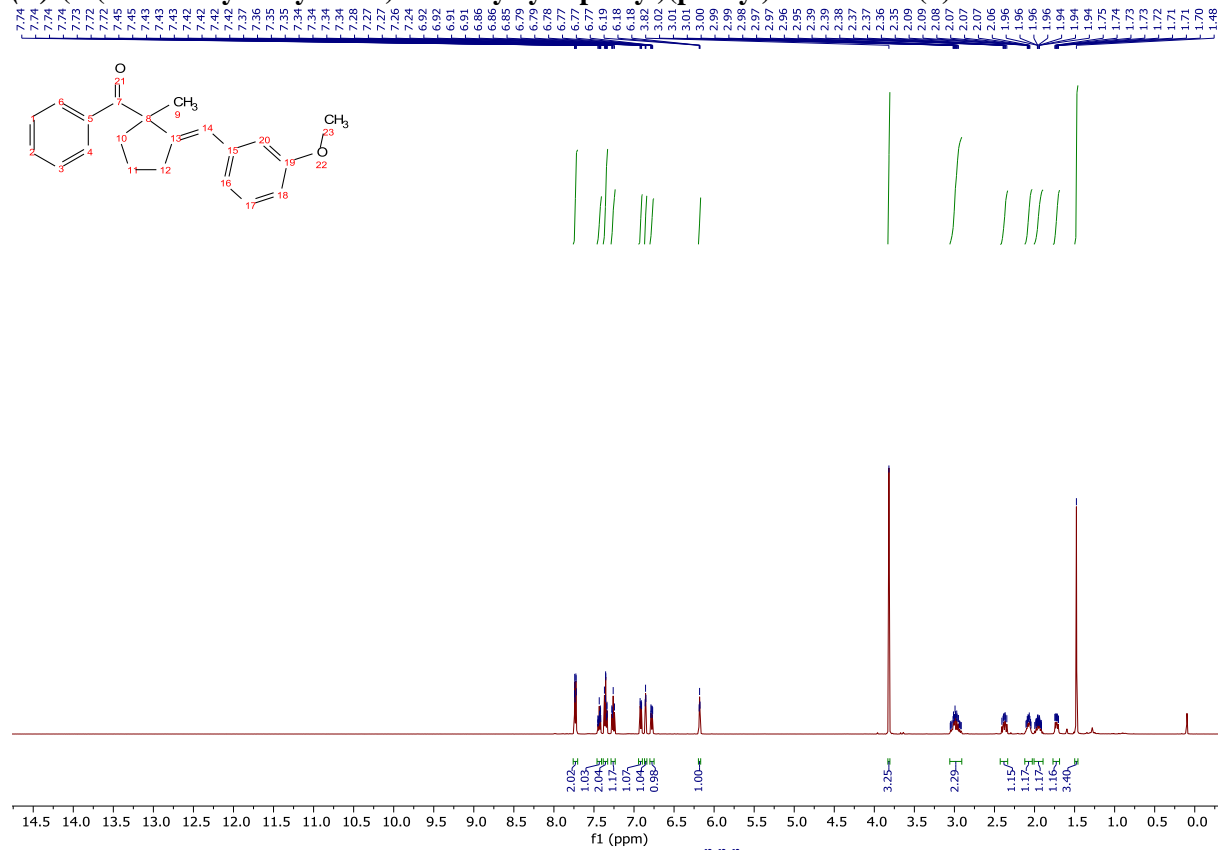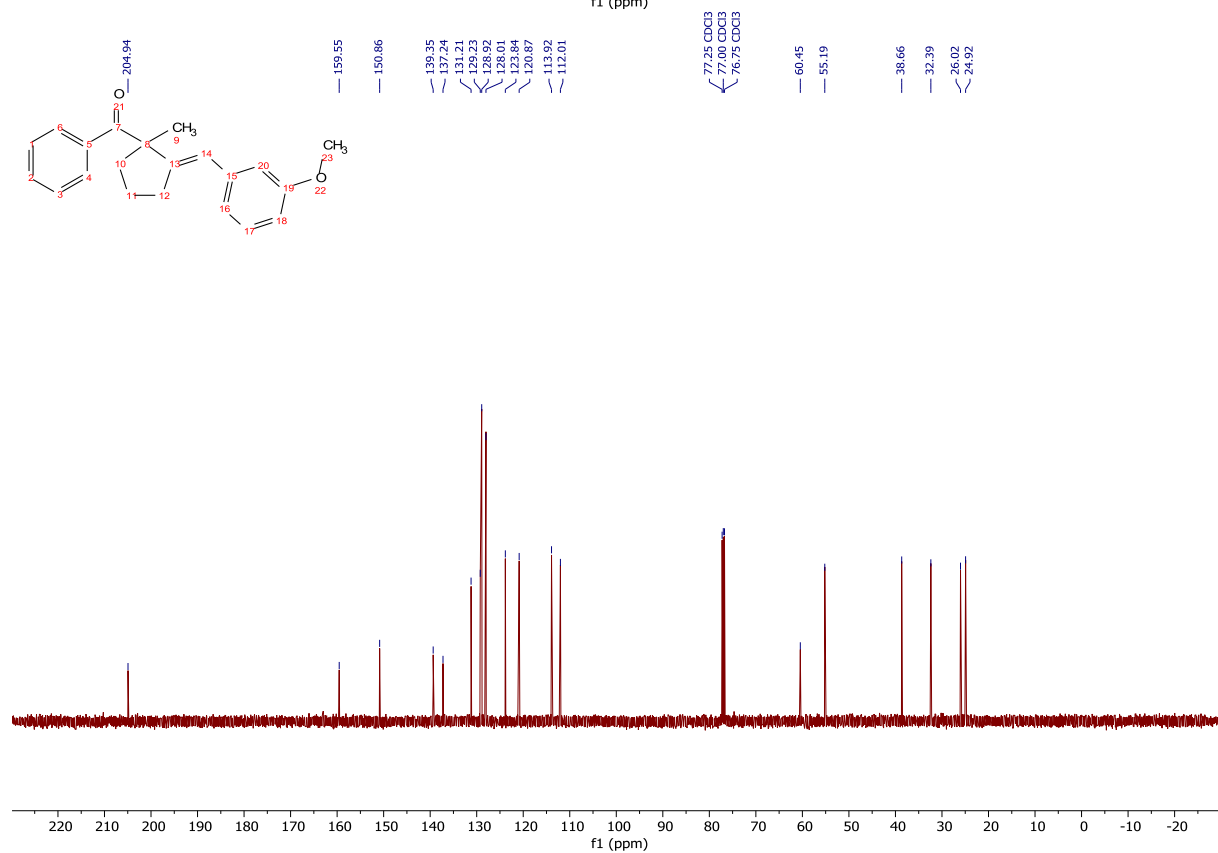

**(E)-(1-methyl-2-(4-(methylthio)benzylidene)cyclopentyl)(phenyl)methanone (9)**

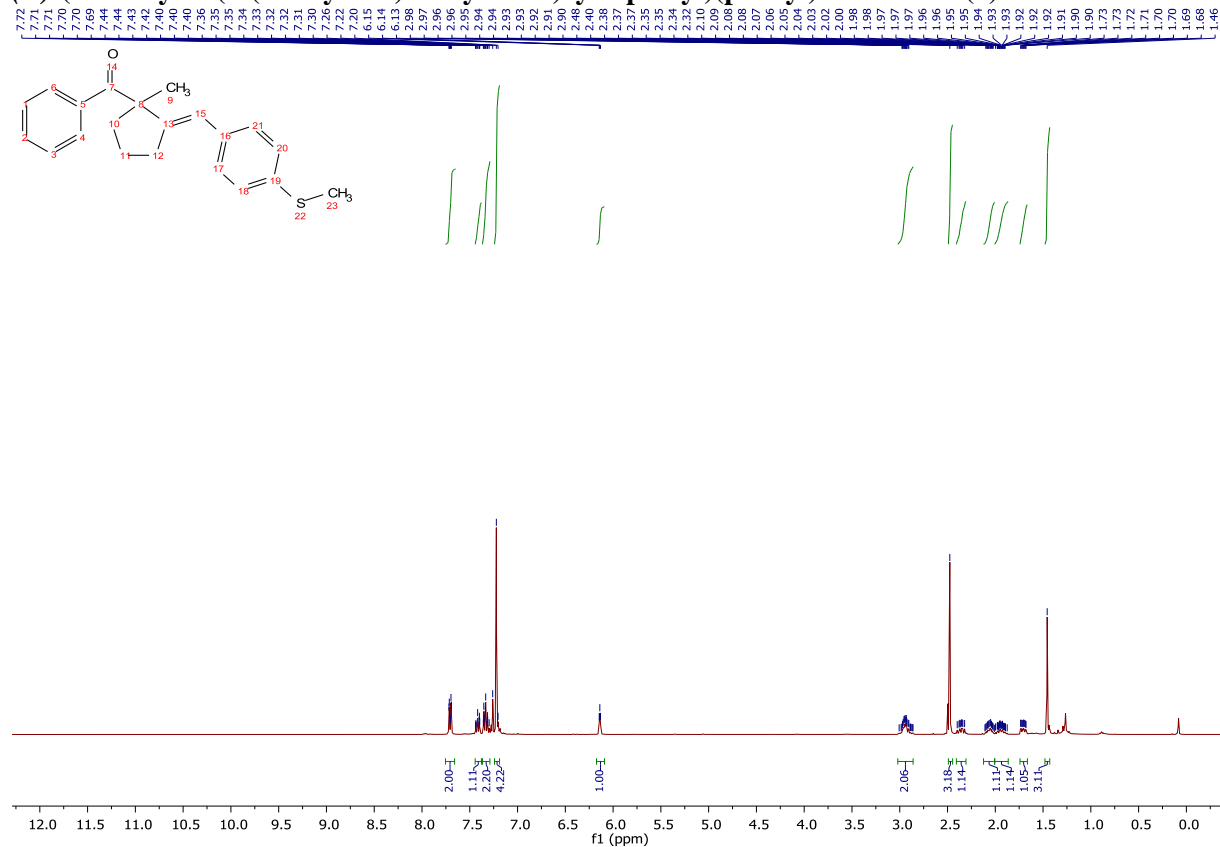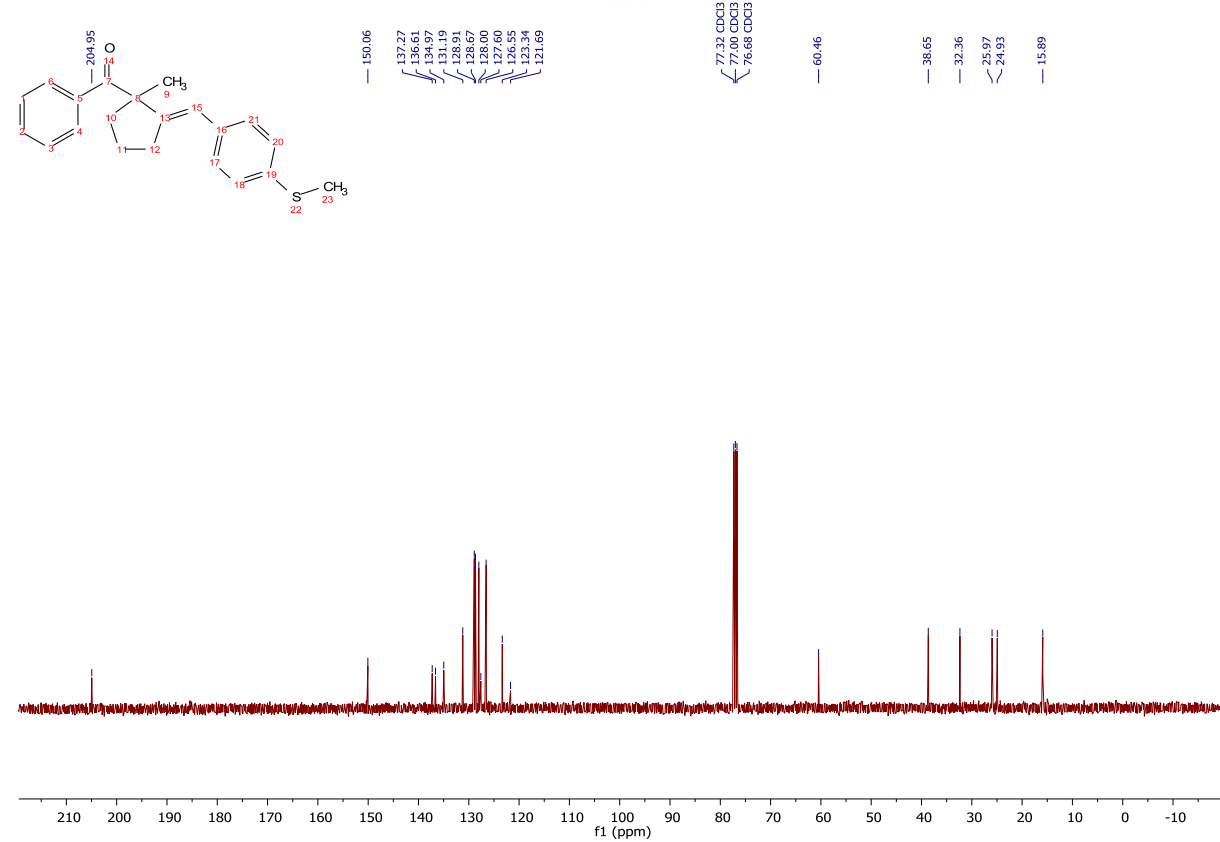

**(E)-1-methyl-2-(4-((trifluoromethyl)thio)benzylidene)cyclopentyl(phenyl)methanone (10)**

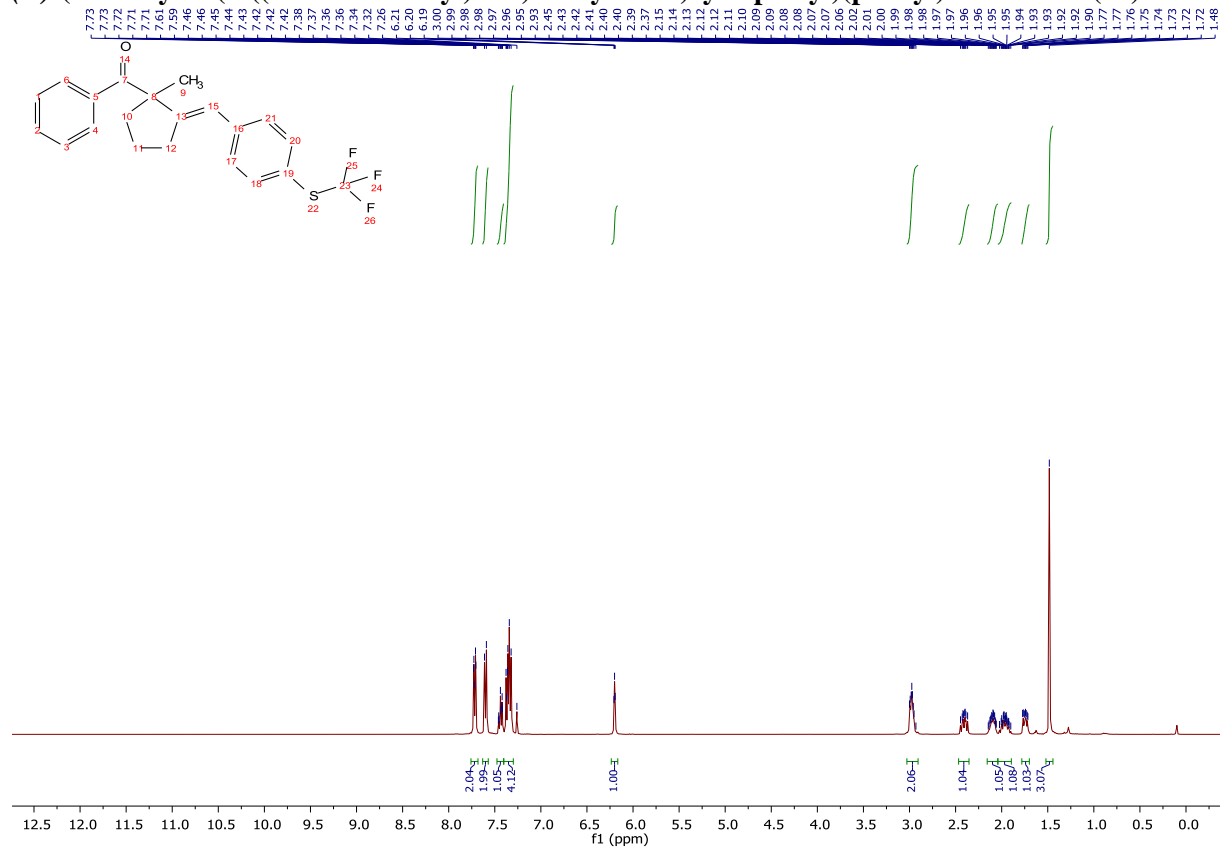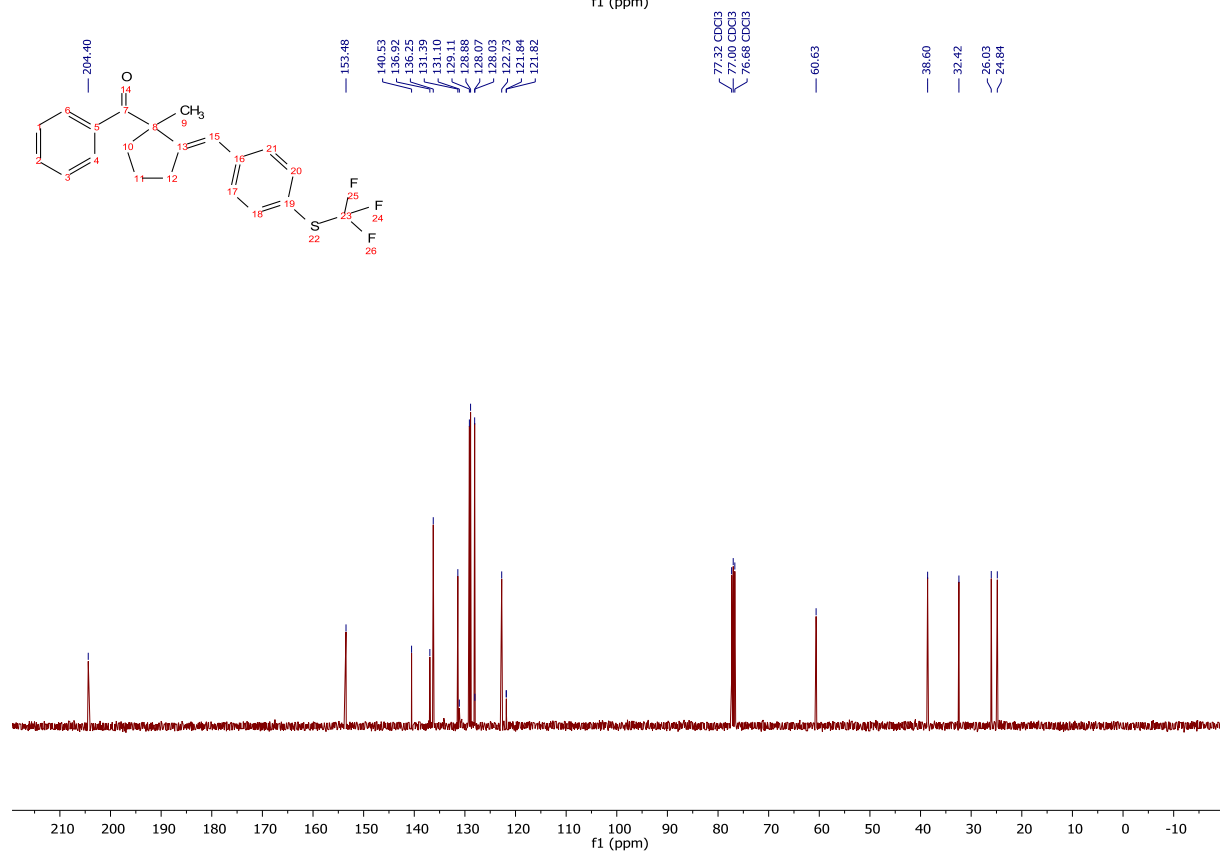



**(E)-2-(4-fluorobenzylidene)-1-methylcyclopentyl(phenyl)methanone (11)**

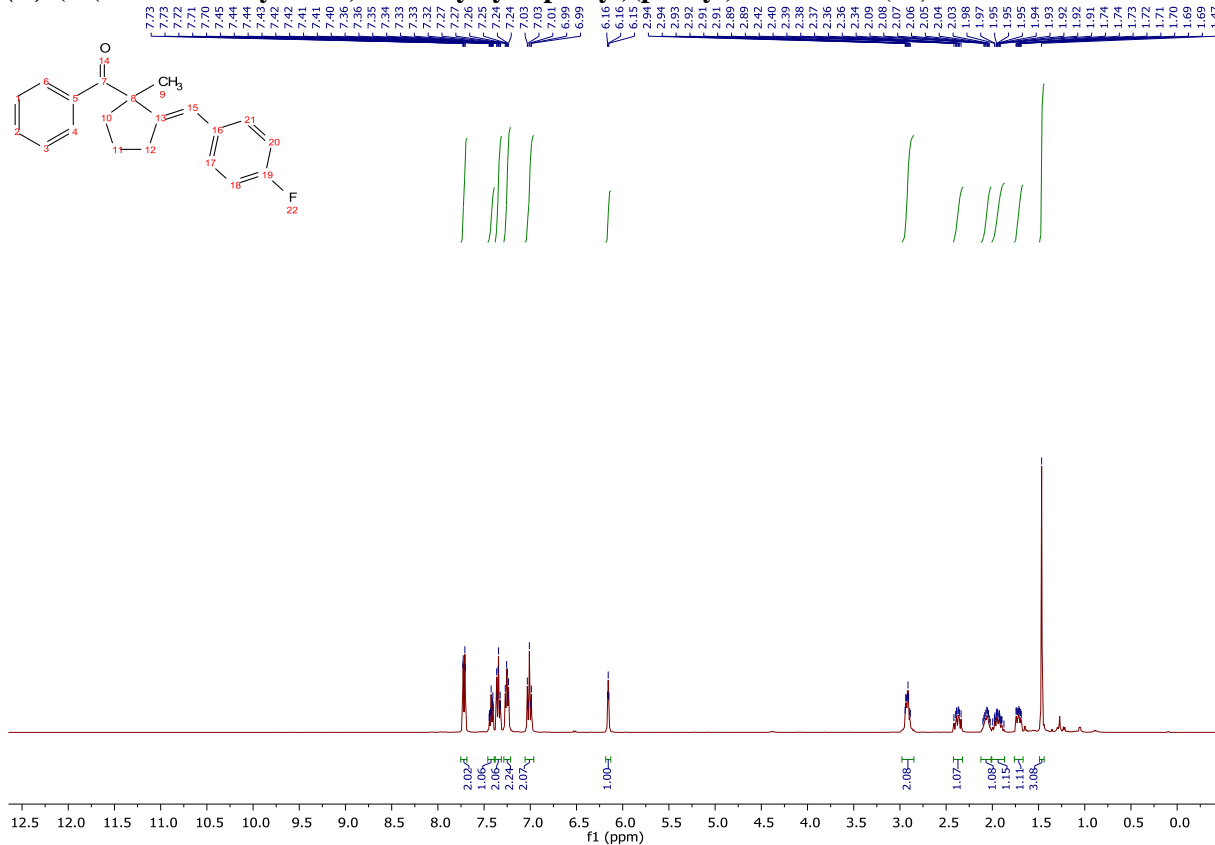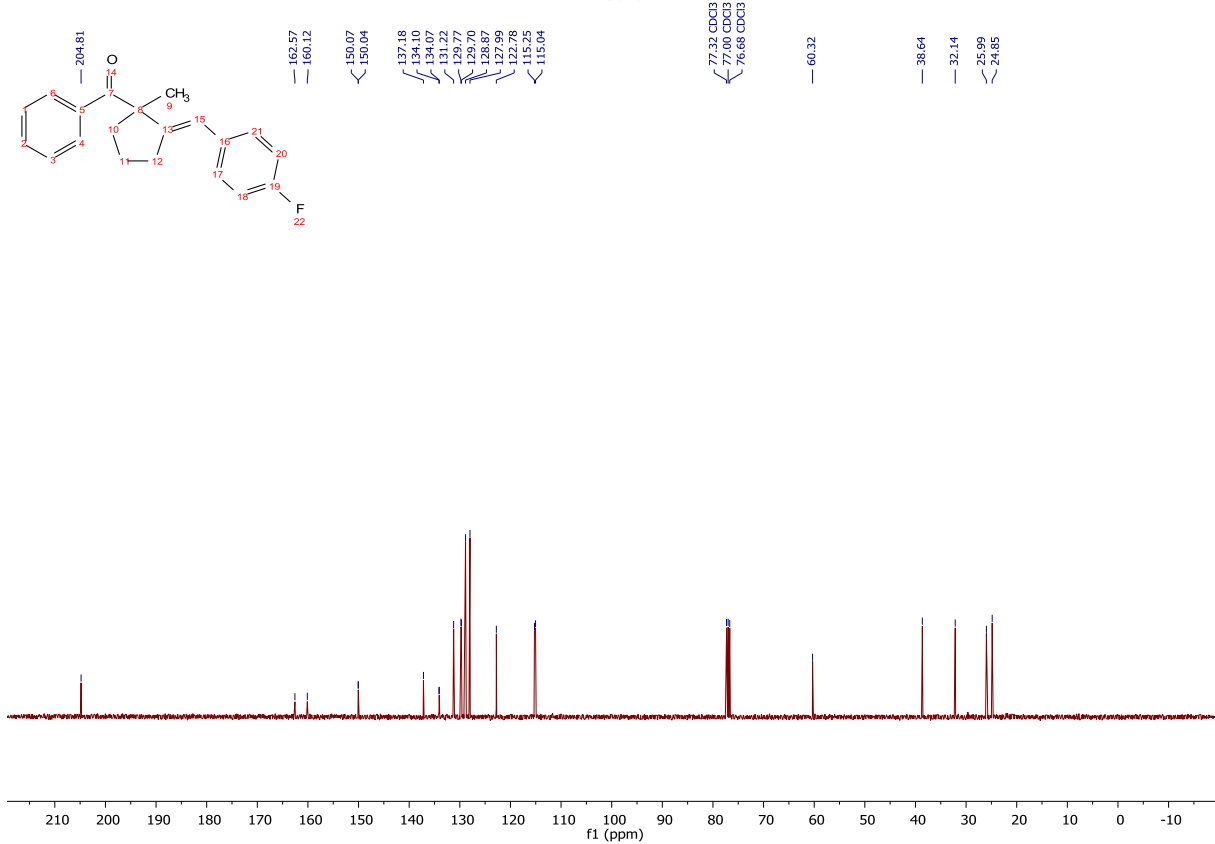

**(E)-(1-methyl-2-(4-(trifluoromethyl)benzylidene)cyclopentyl)(phenyl)methanone (12)**

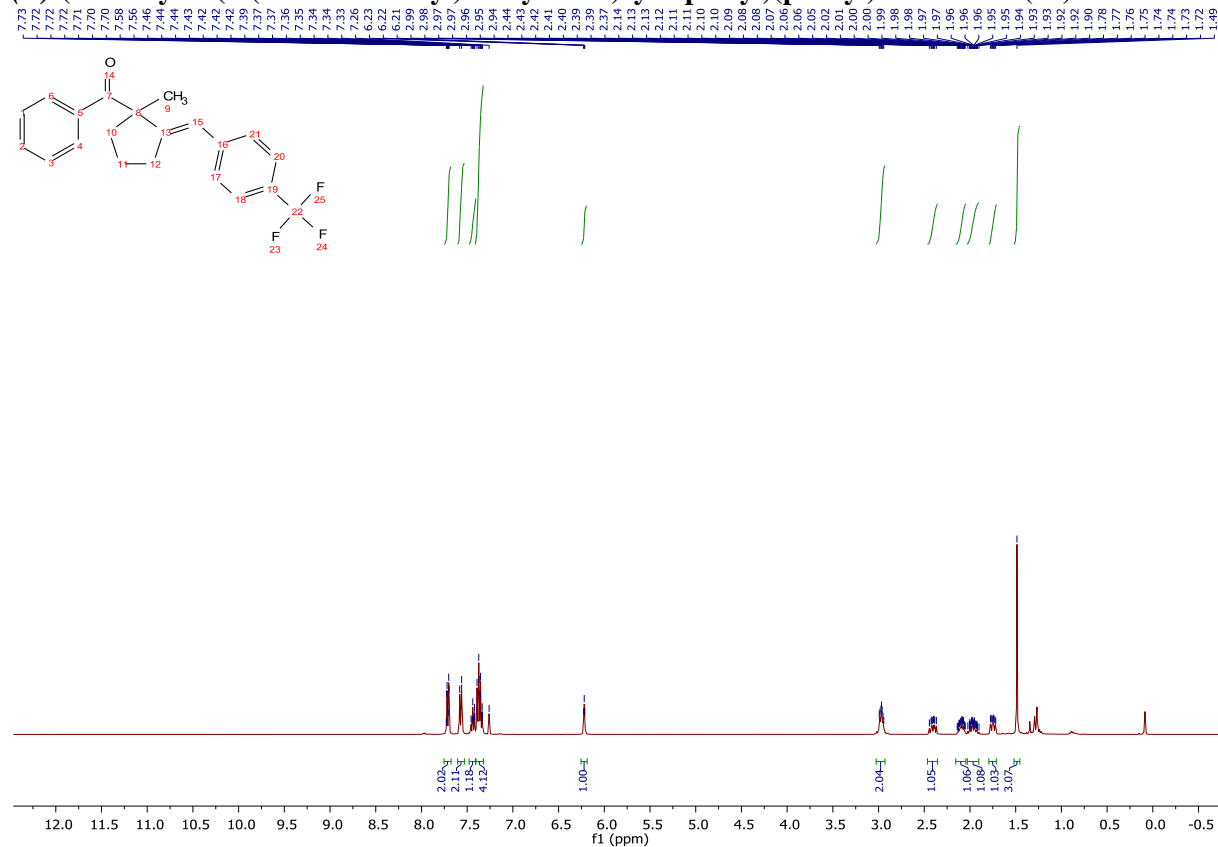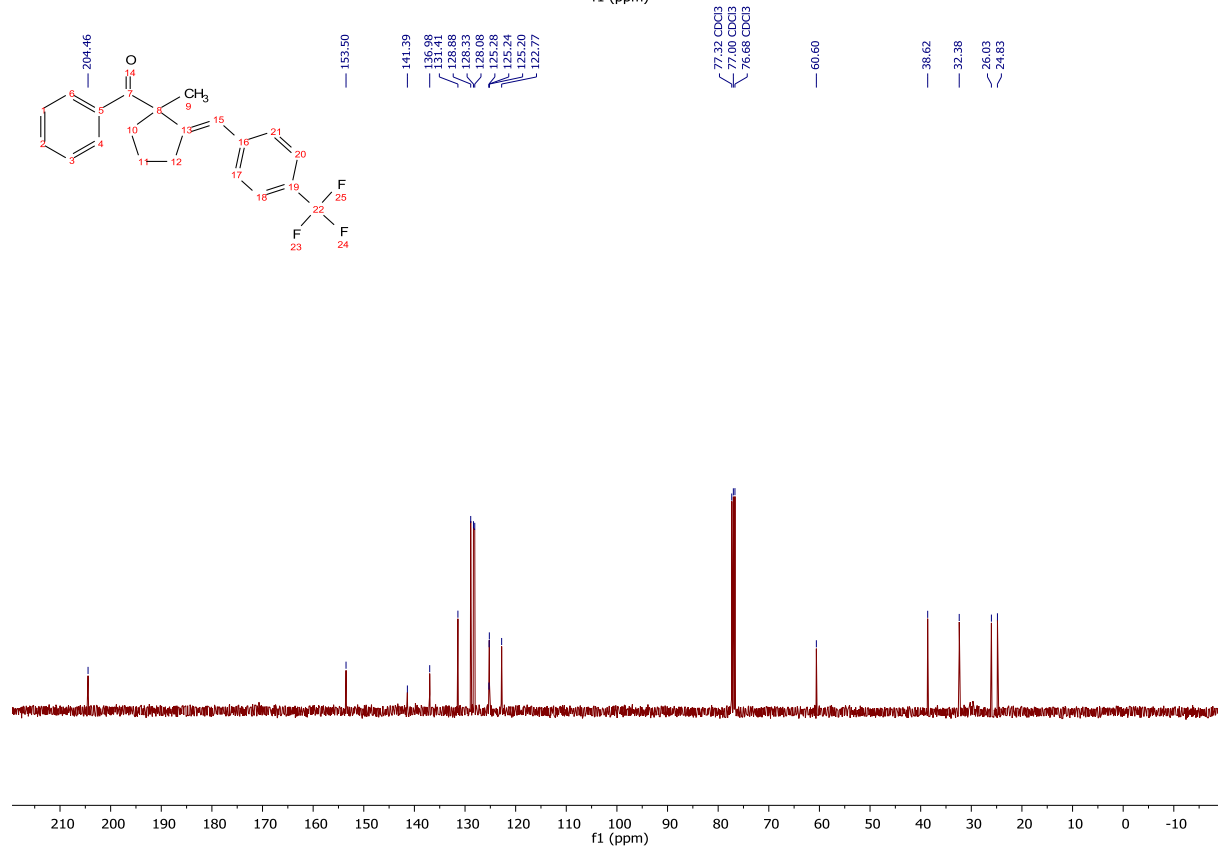



**Methyl (*E*)-4-((2-benzoyl-2-methylcyclopentylidene)methyl)benzoate (14)**

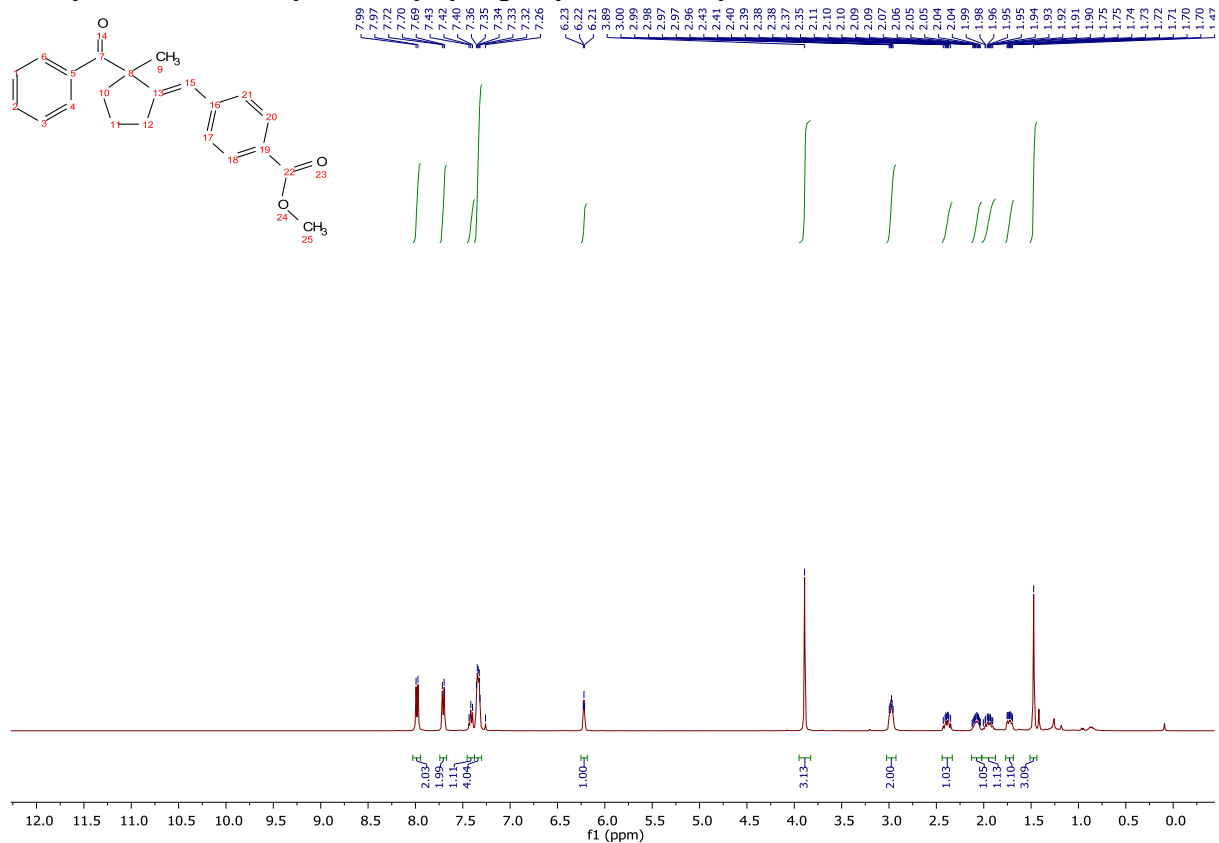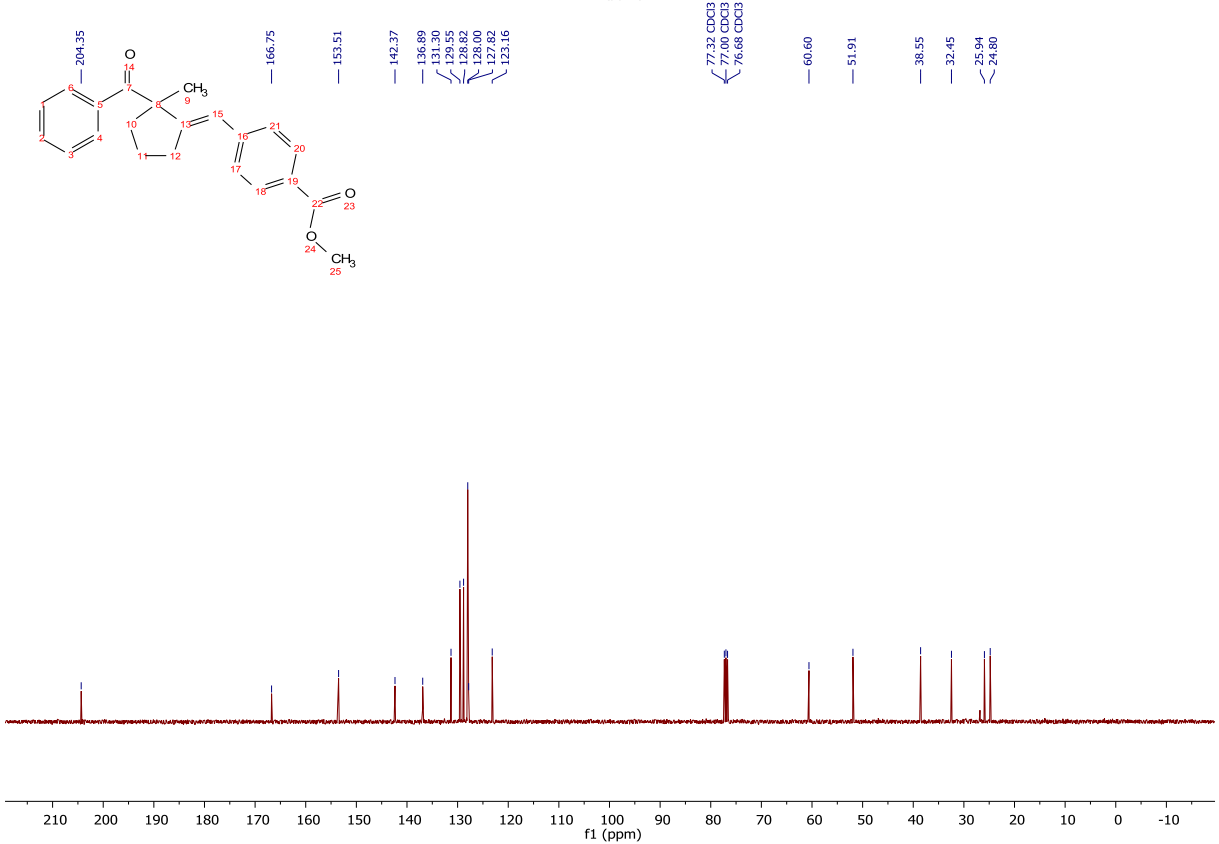

**(E)-4-((2-benzoyl-2-methylcyclopentylidene)methyl)benzaldehyde (15)**

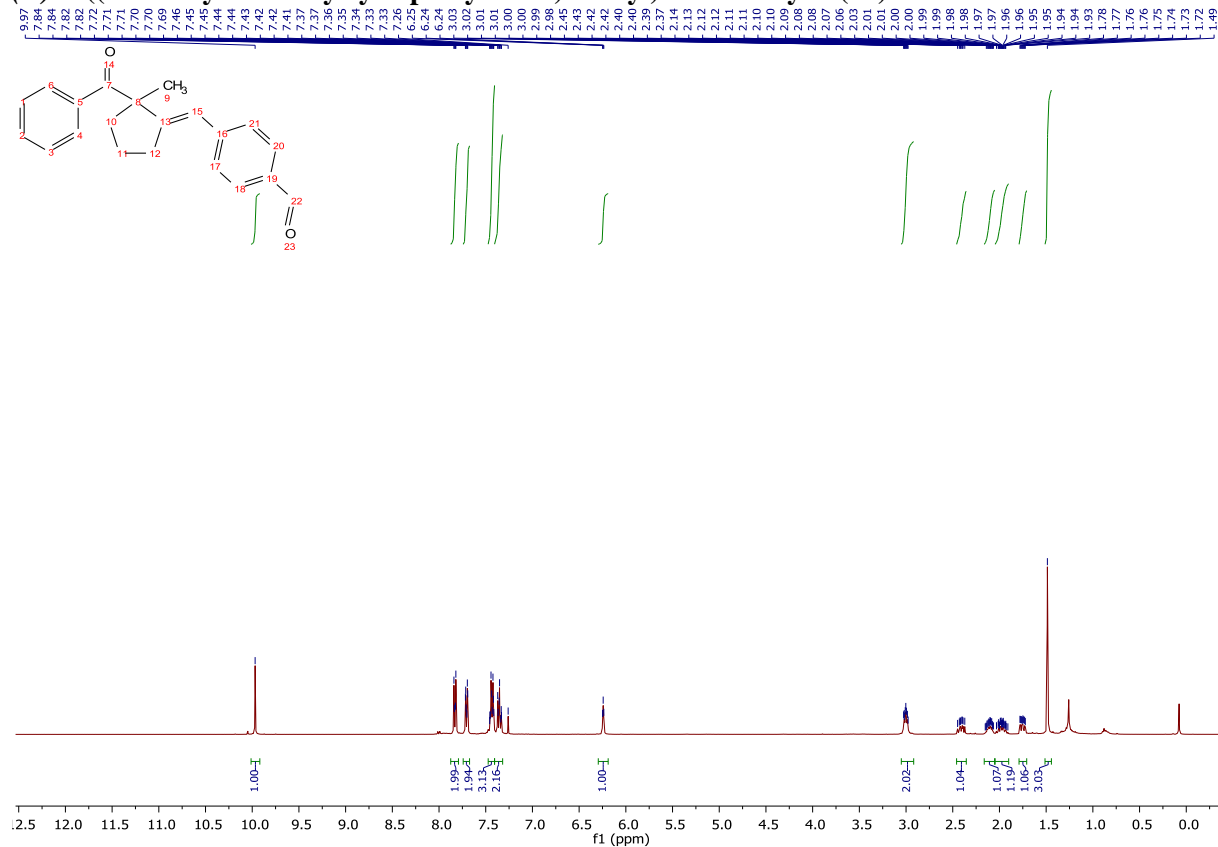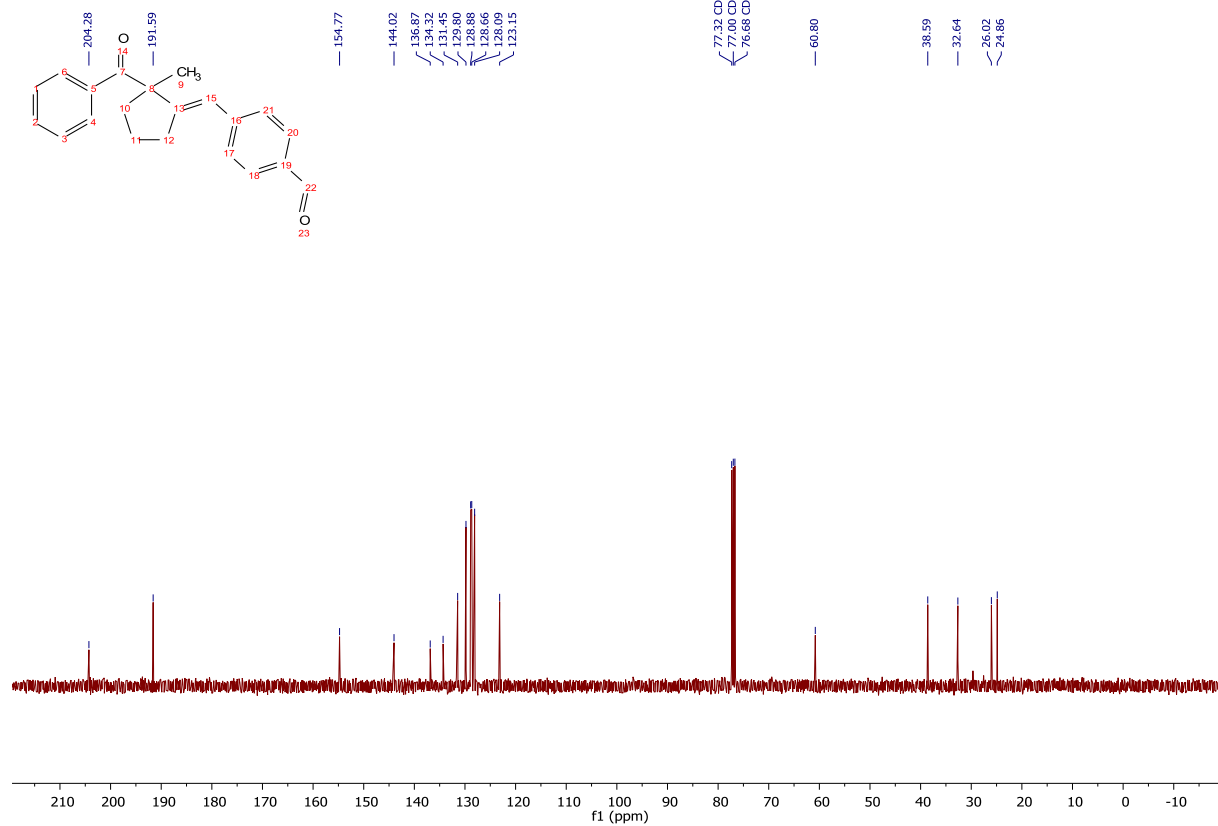

**(E)-1-(4-((2-benzoyl-2-methylcyclopentylidene)methyl)phenyl)ethan-1-one (16)**

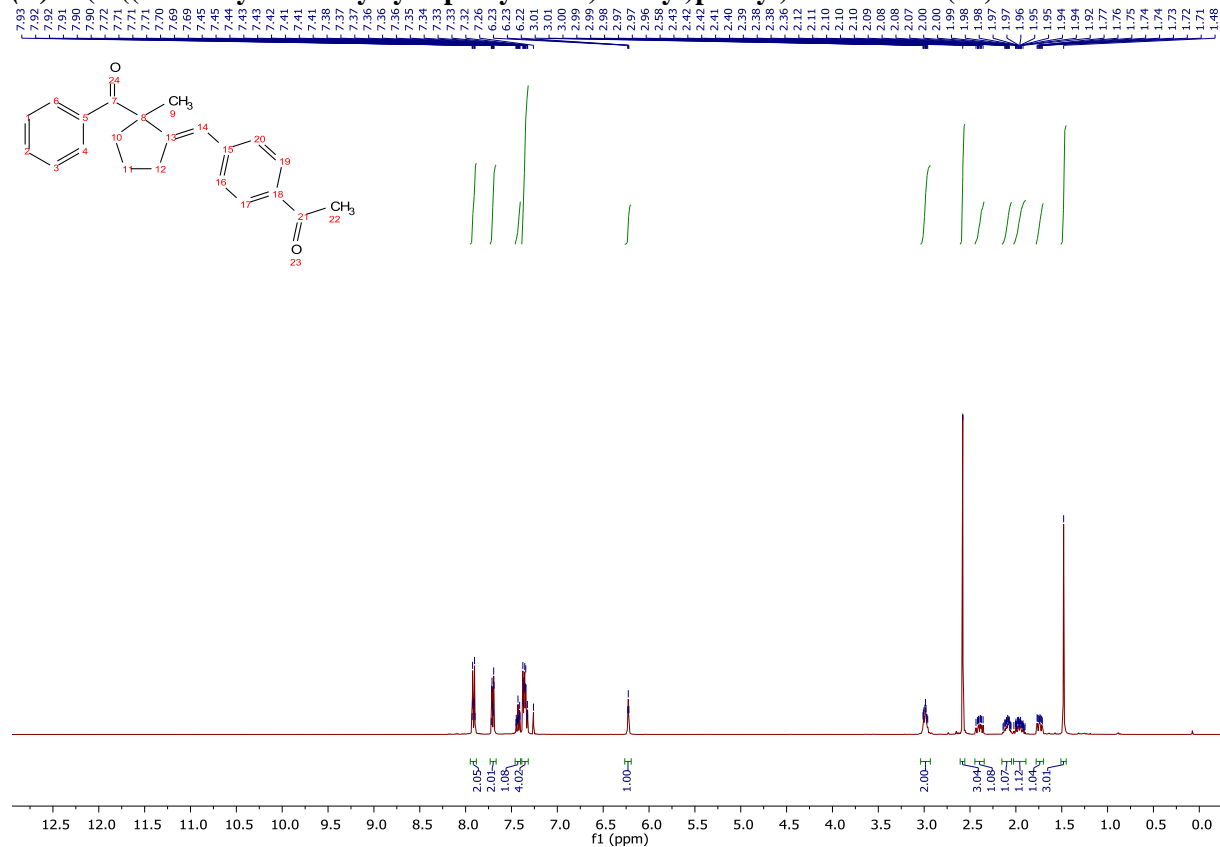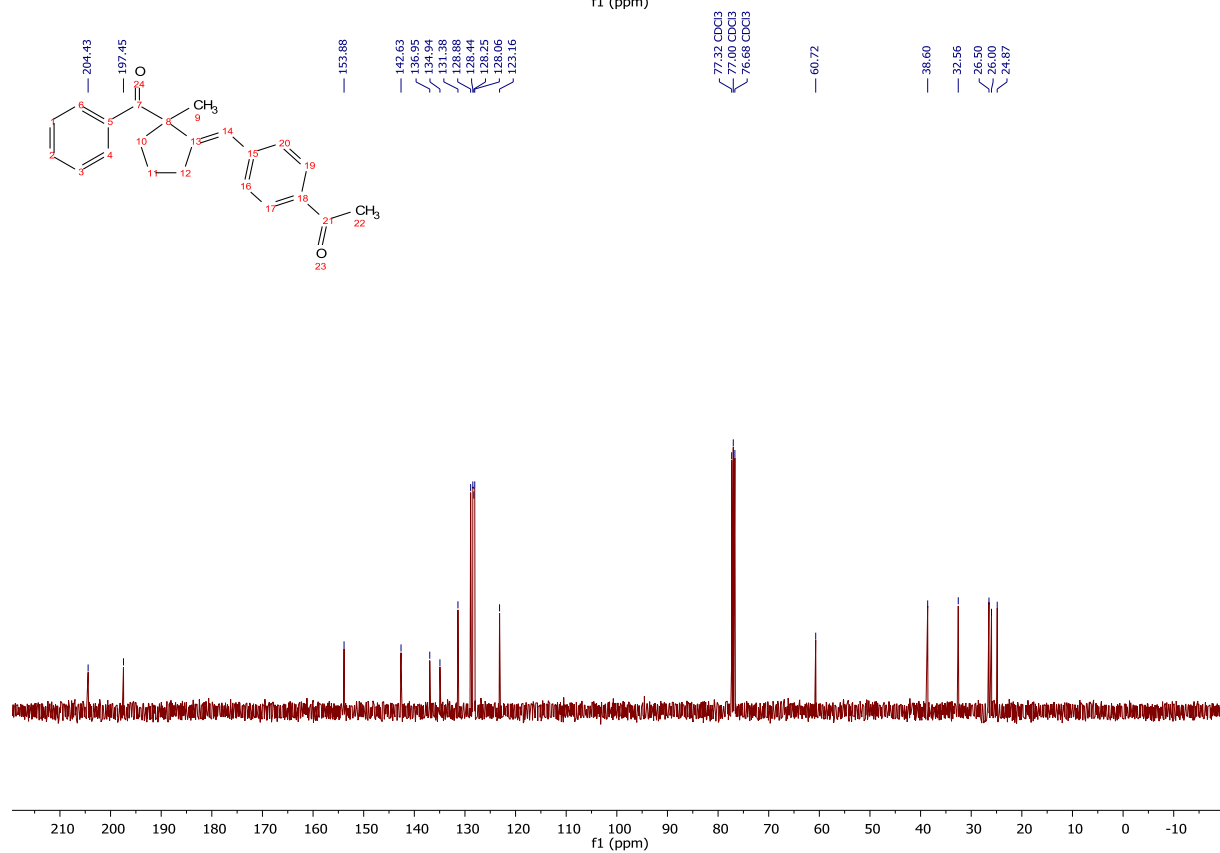

**(E)-1-(4-((2-benzoyl-2-methylcyclopentylidene)methyl)phenyl)ethan-1-one (17)**

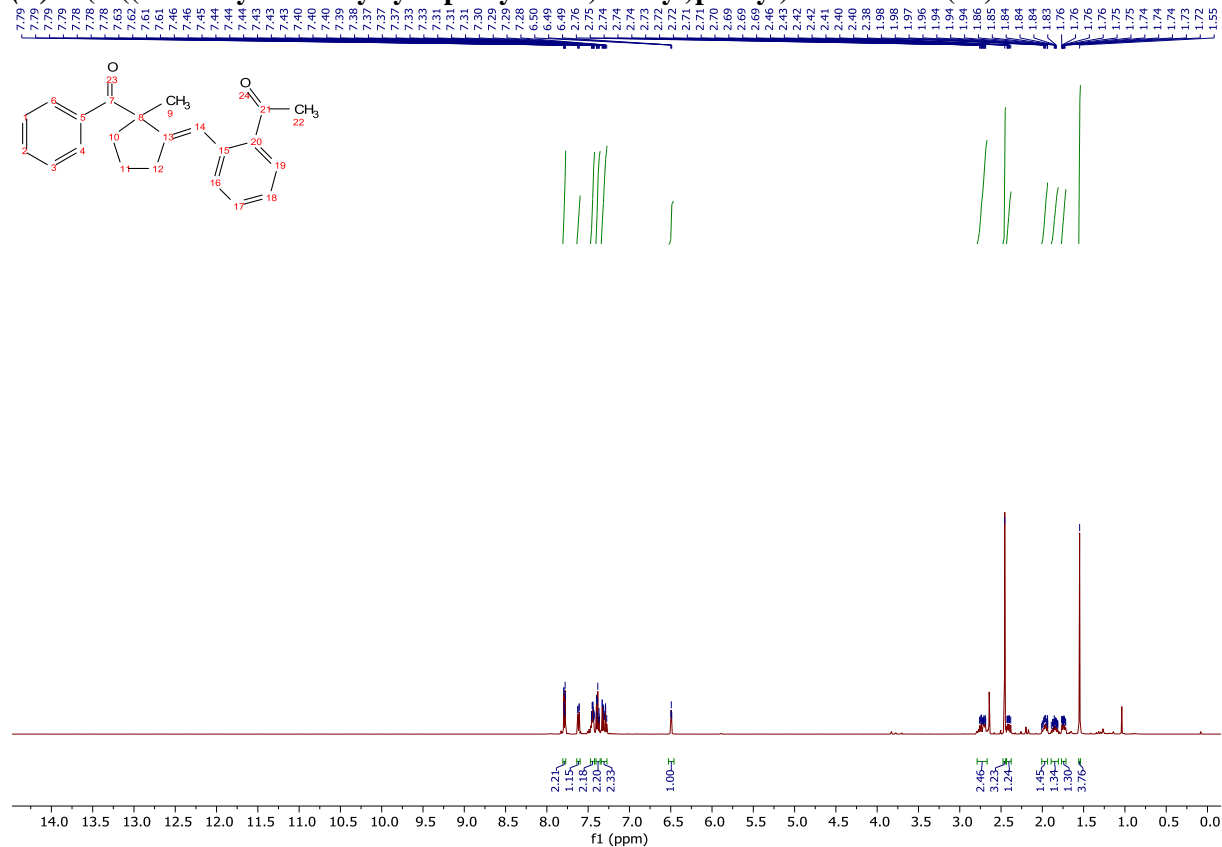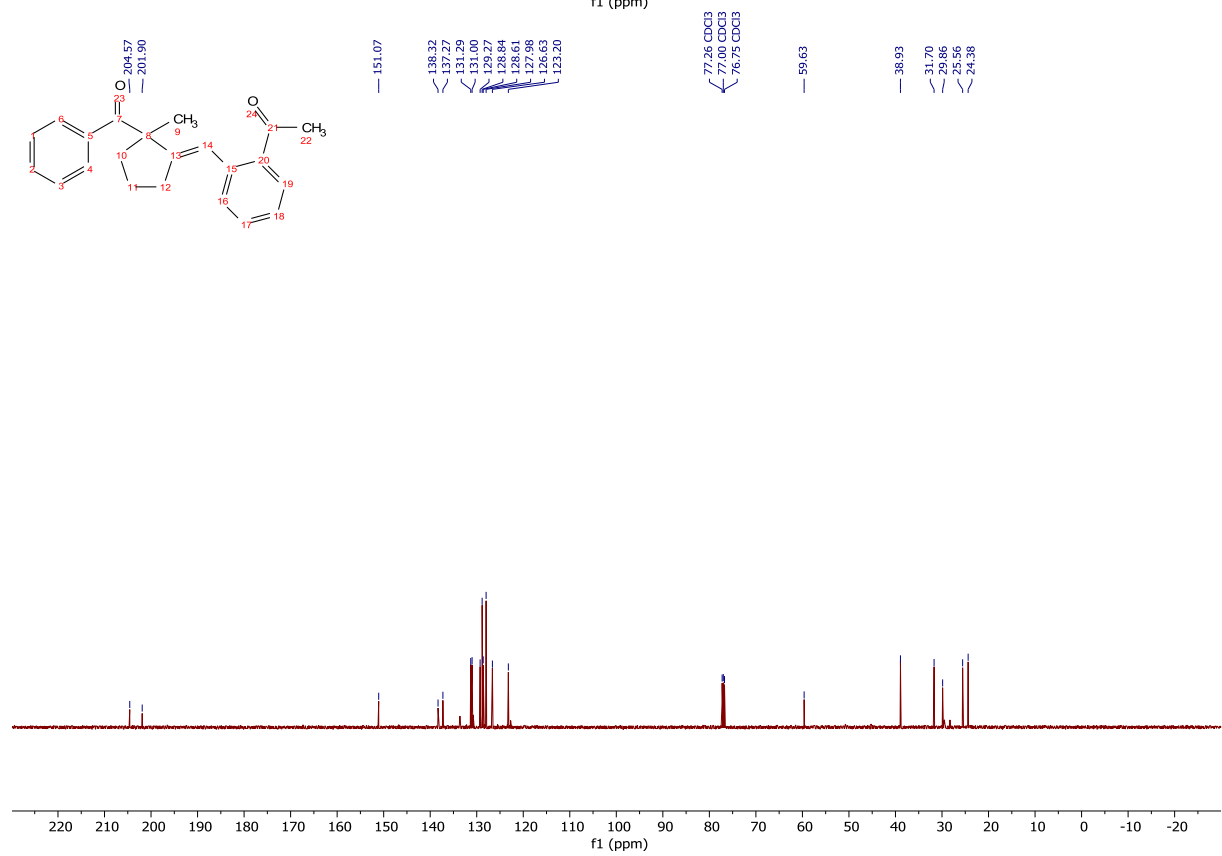

**(E)-(1-methyl-2-(4-nitrobenzylidene)cyclopentyl)(phenyl)methanone (18)**

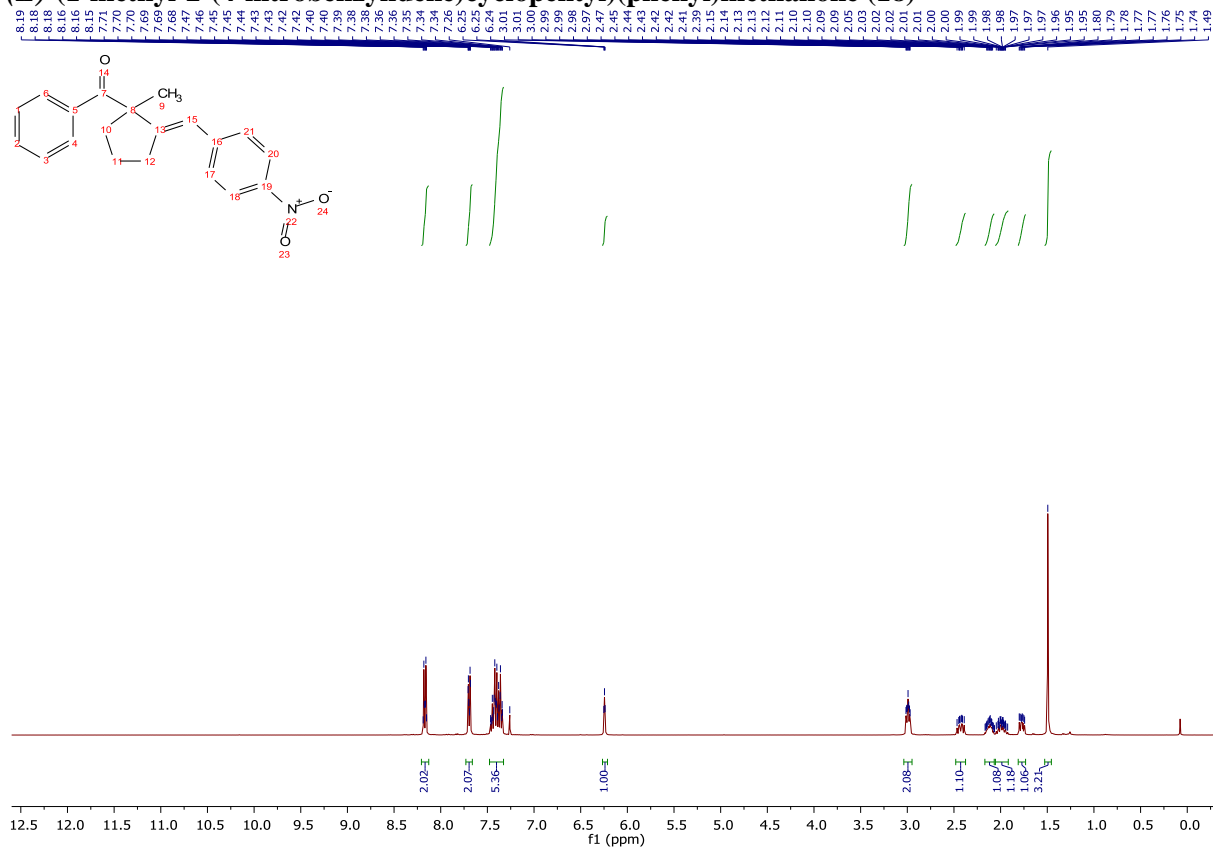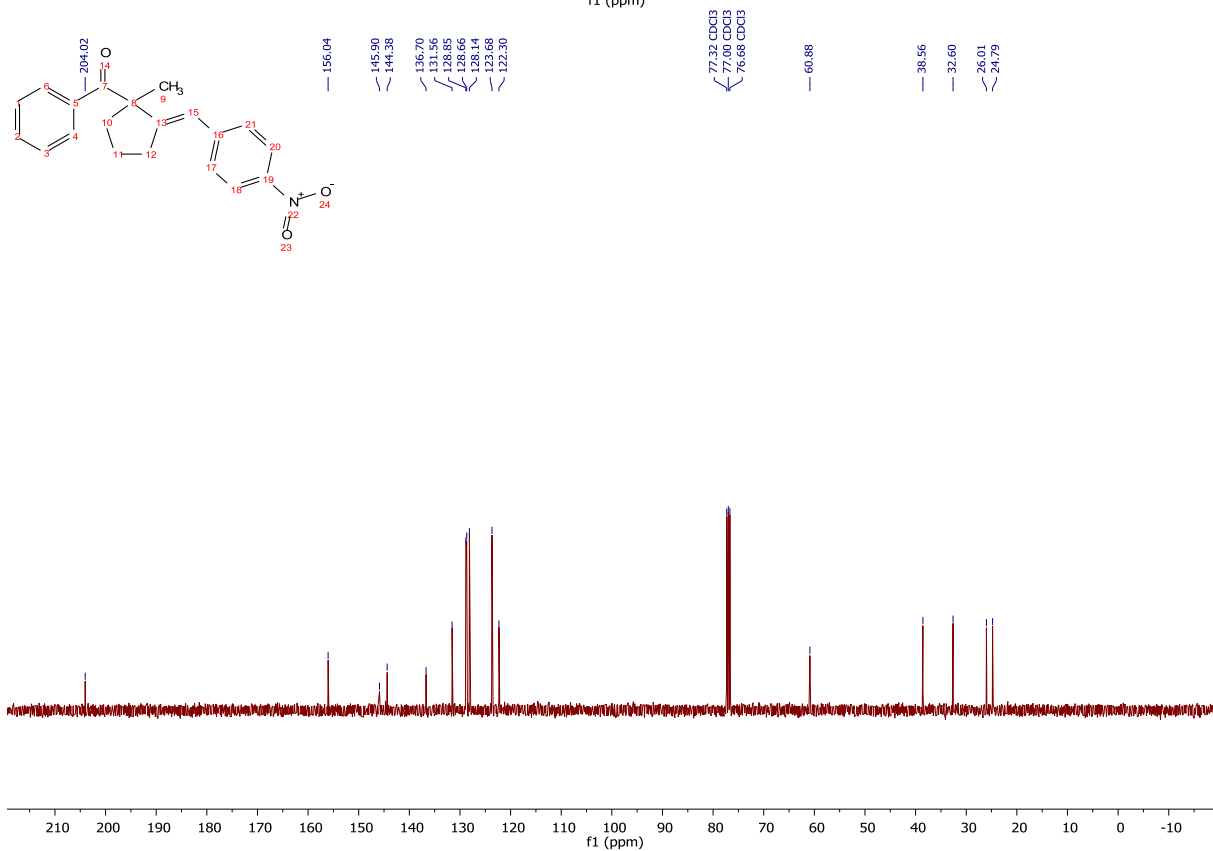



**(E)-(1-methyl-2-(2-nitrobenzylidene)cyclopentyl)(phenyl)methanone (19)**

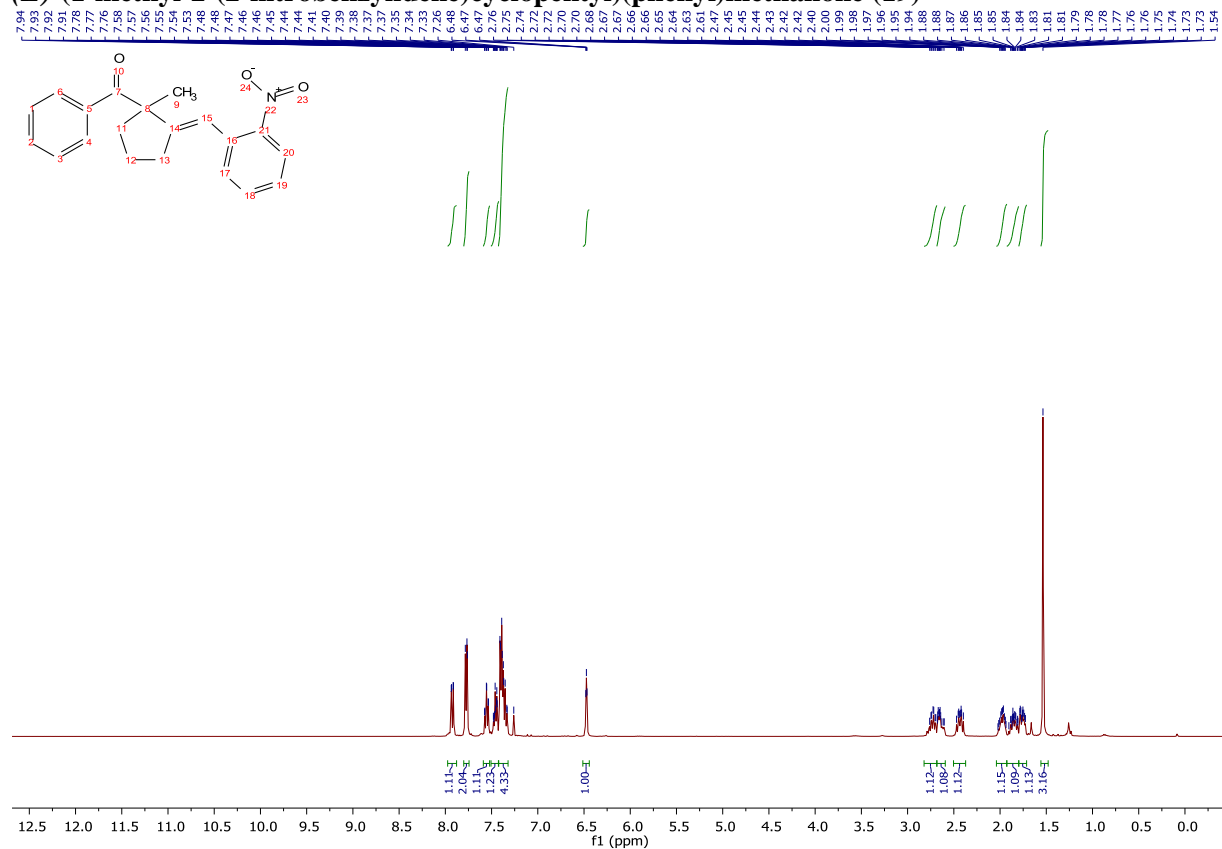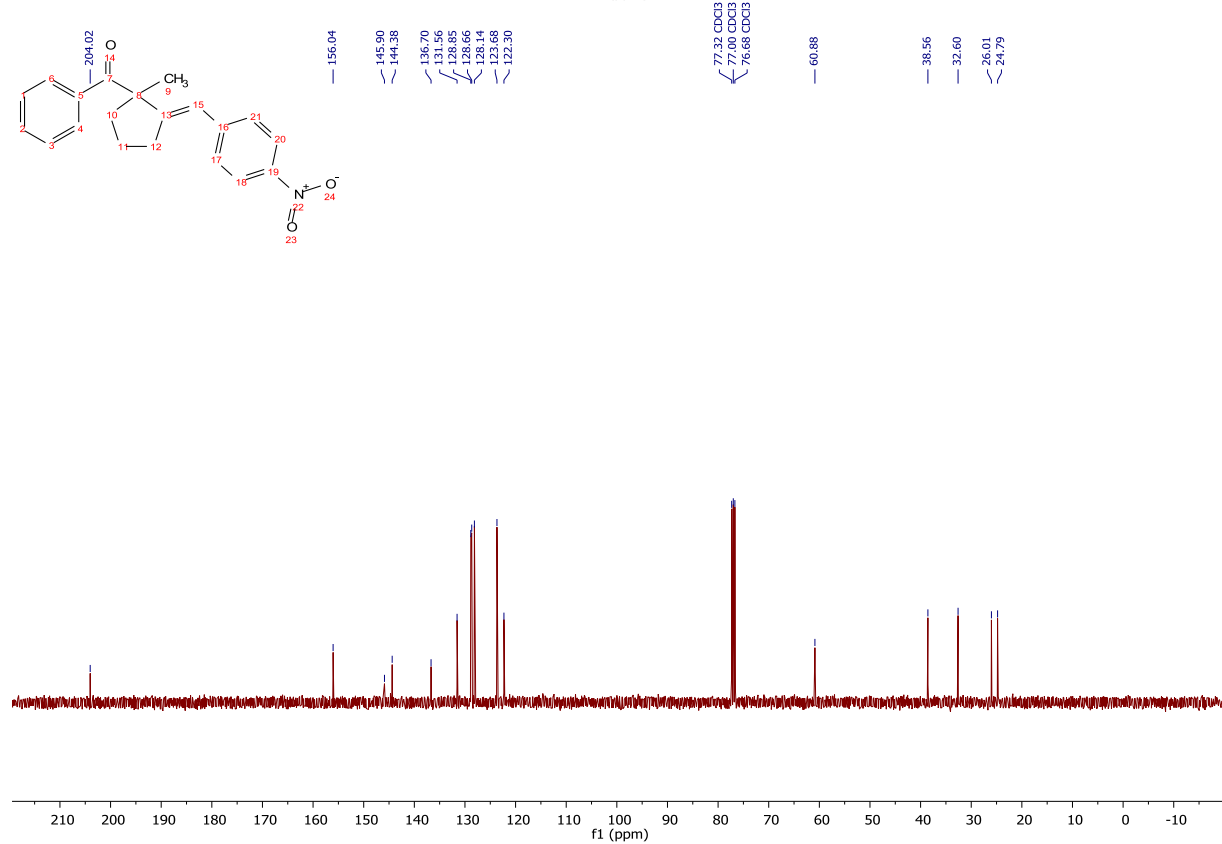

**(E)-(1-methyl-2-(pyridin-3-ylmethylene)cyclopentyl)(phenyl)methanone (20)**

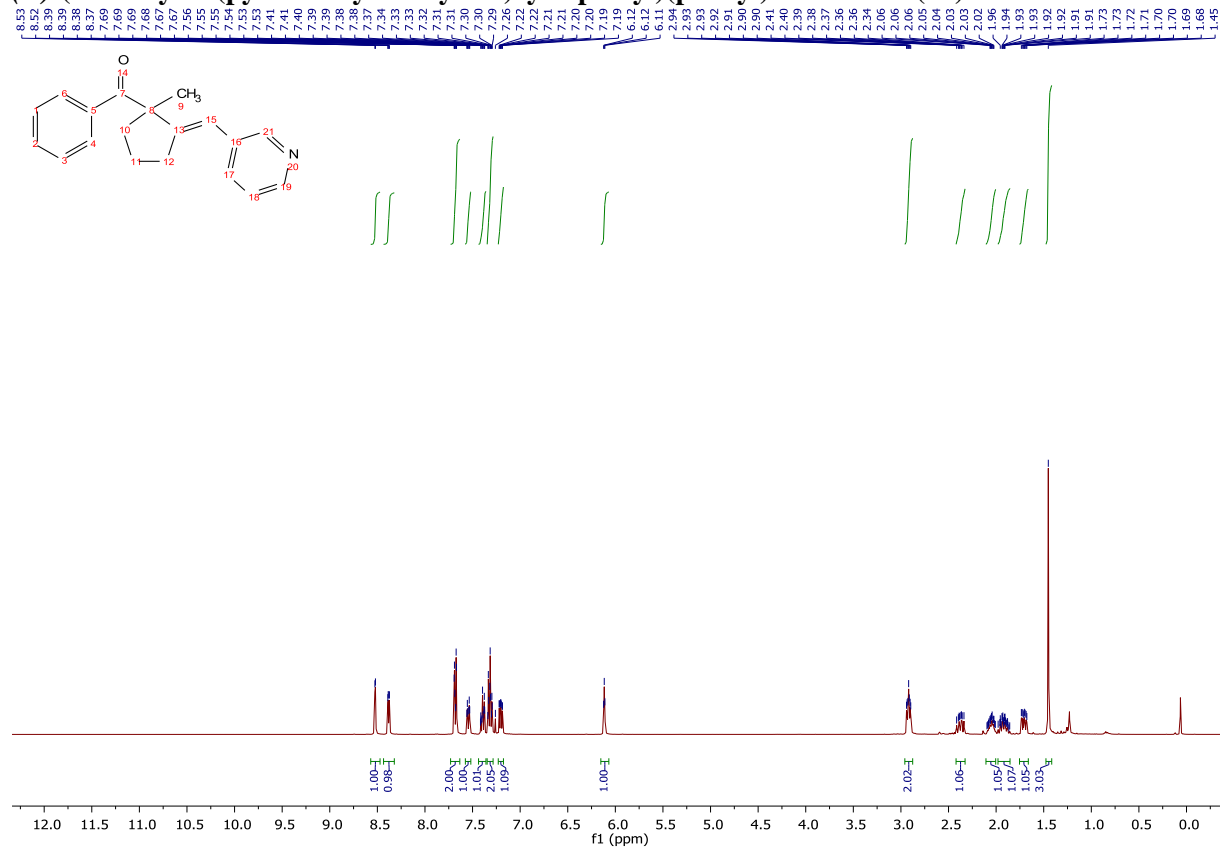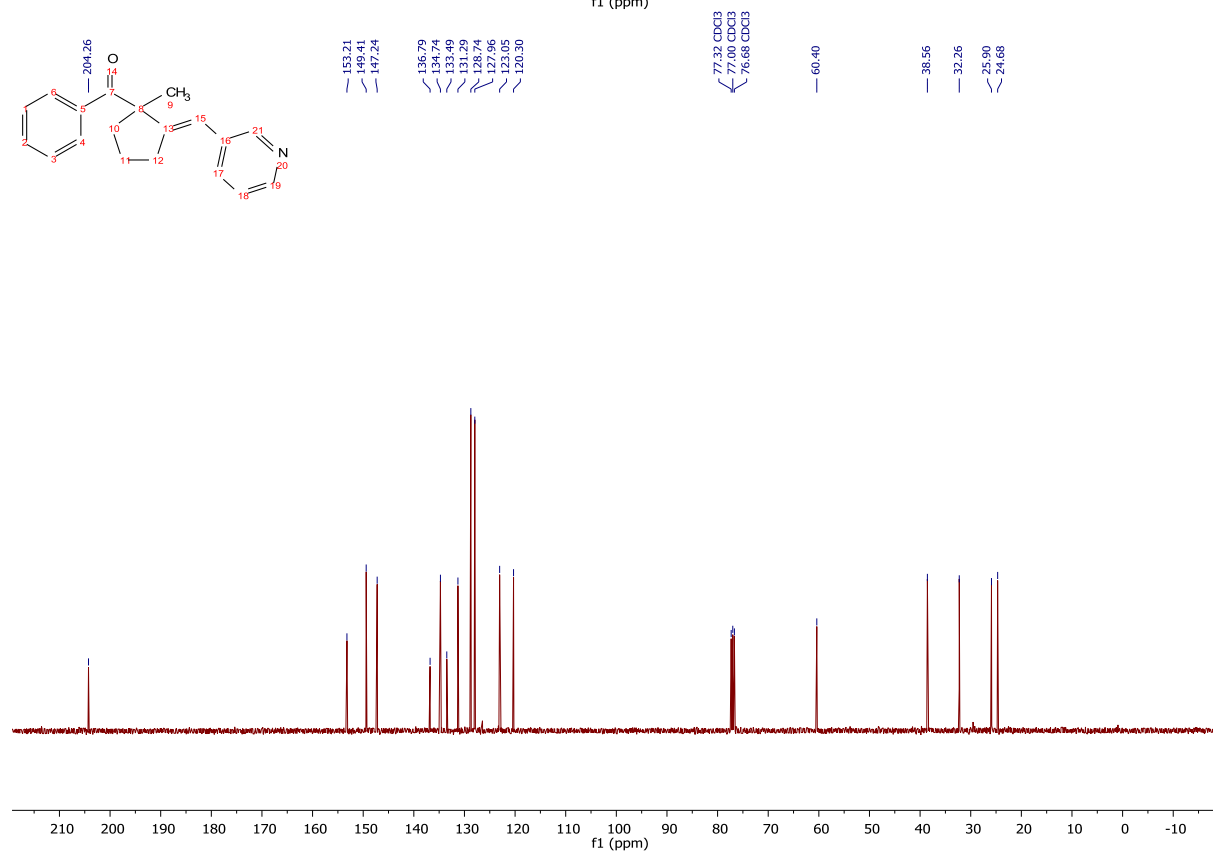

**(E)-(1-methyl-2-(quinolin-2-ylmethylene)cyclopentyl)(phenyl)methanone (21)**

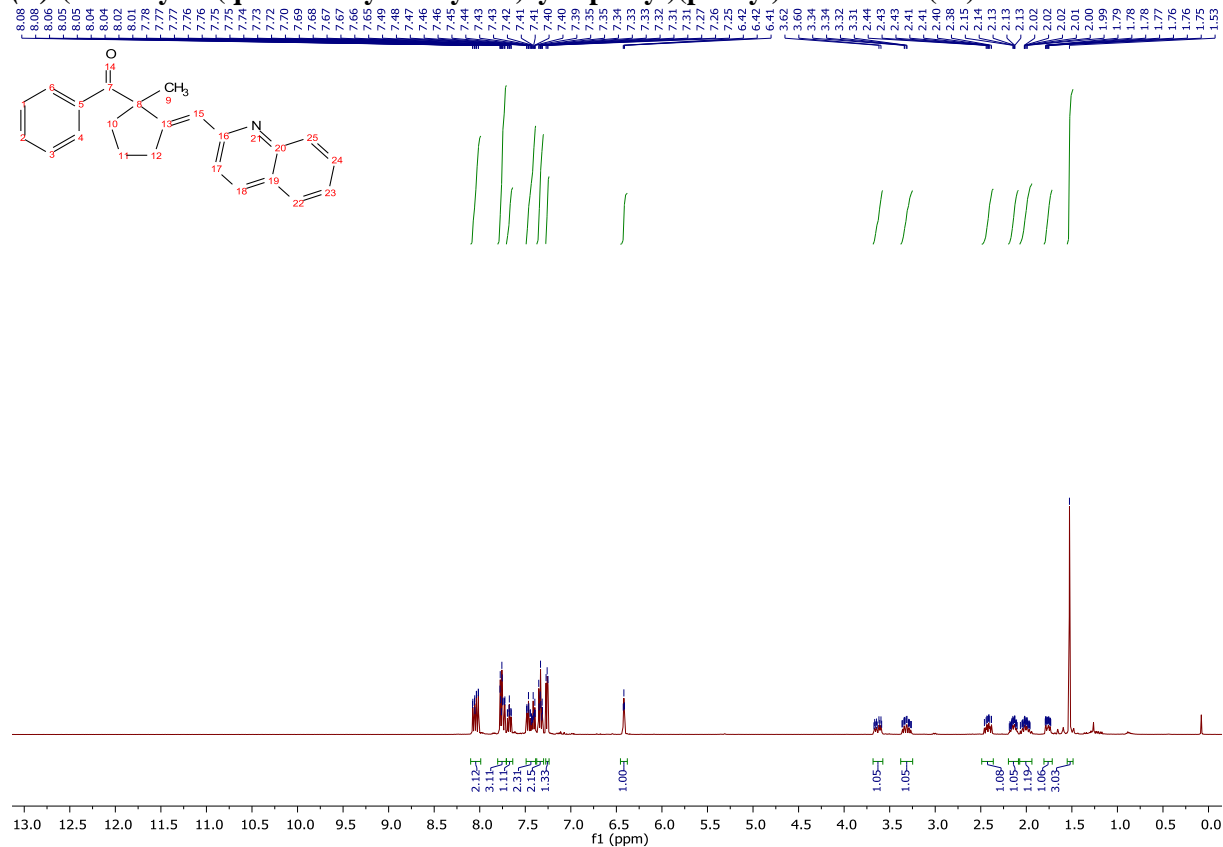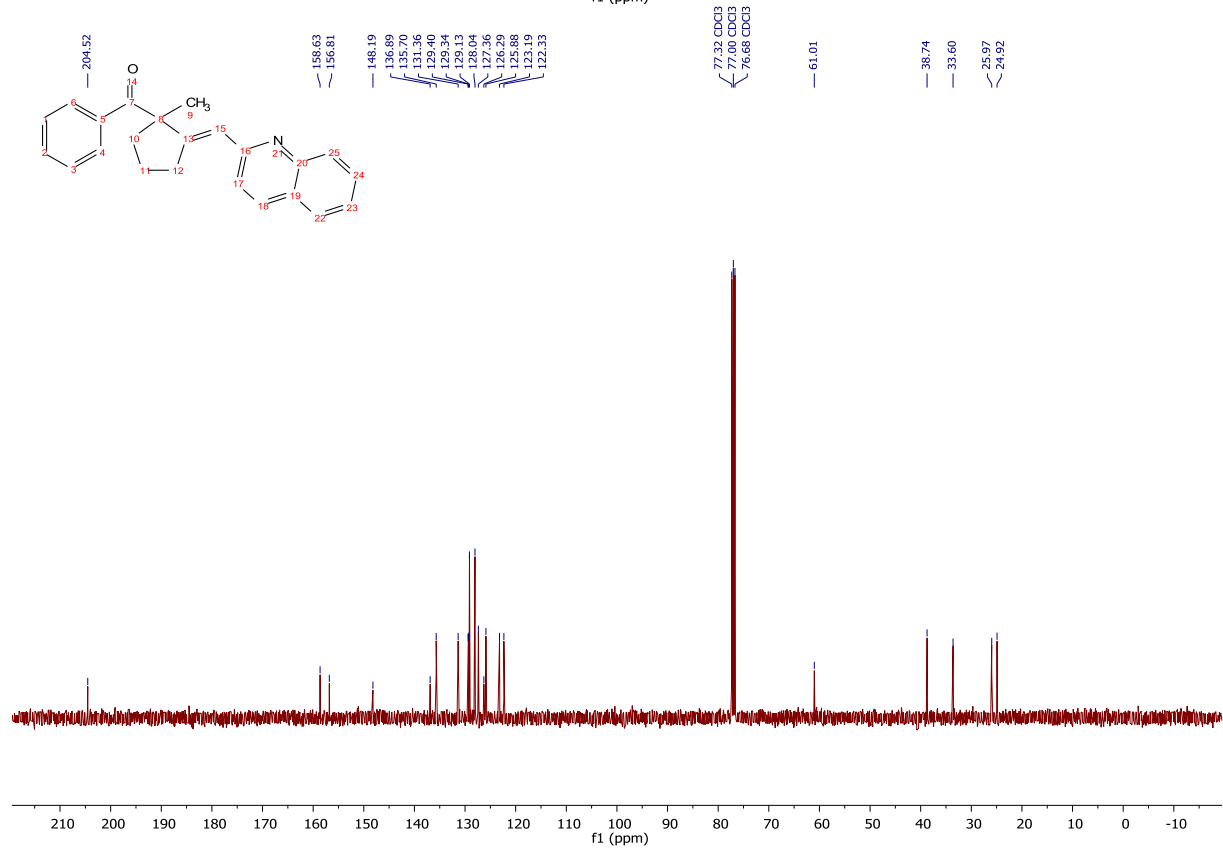

**(E)-(1-methyl-2-(quinoxalin-2-ylmethylene)cyclopentyl)(phenyl)methanone (22)**

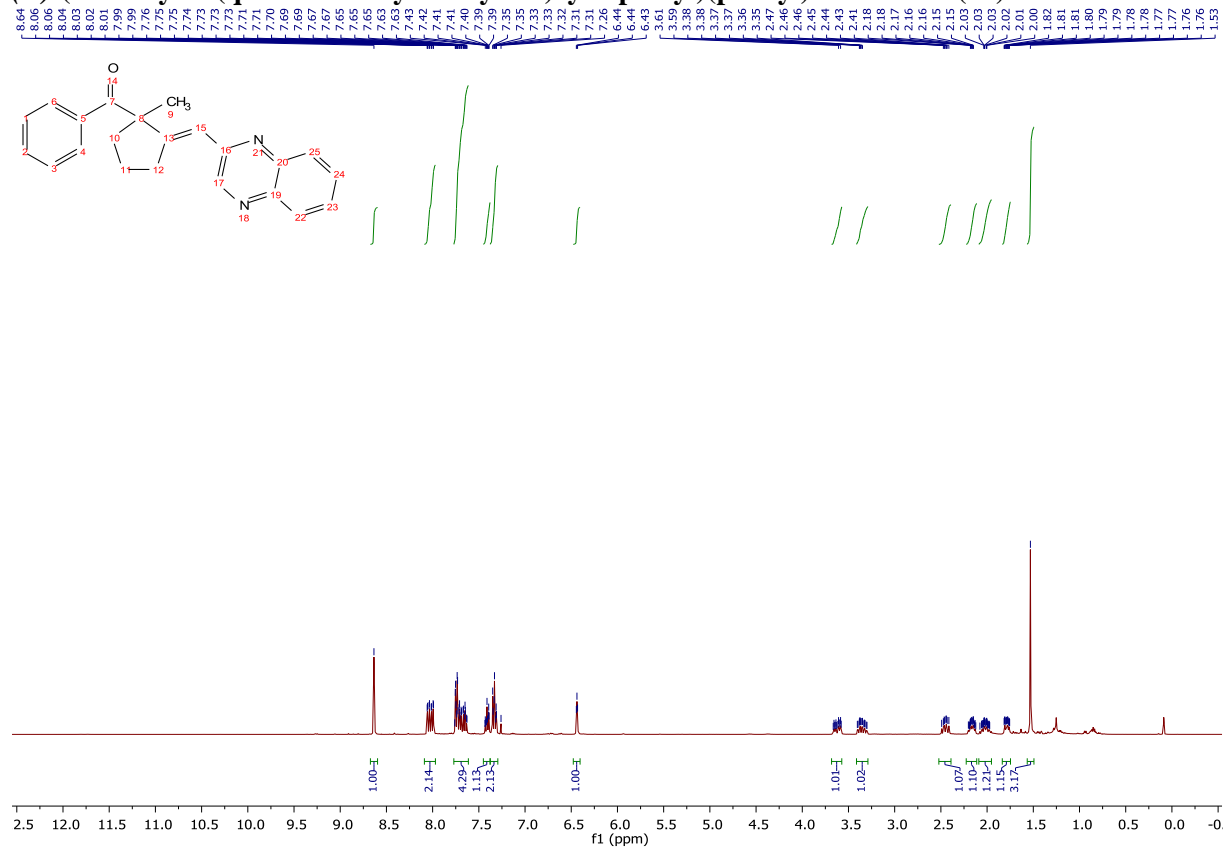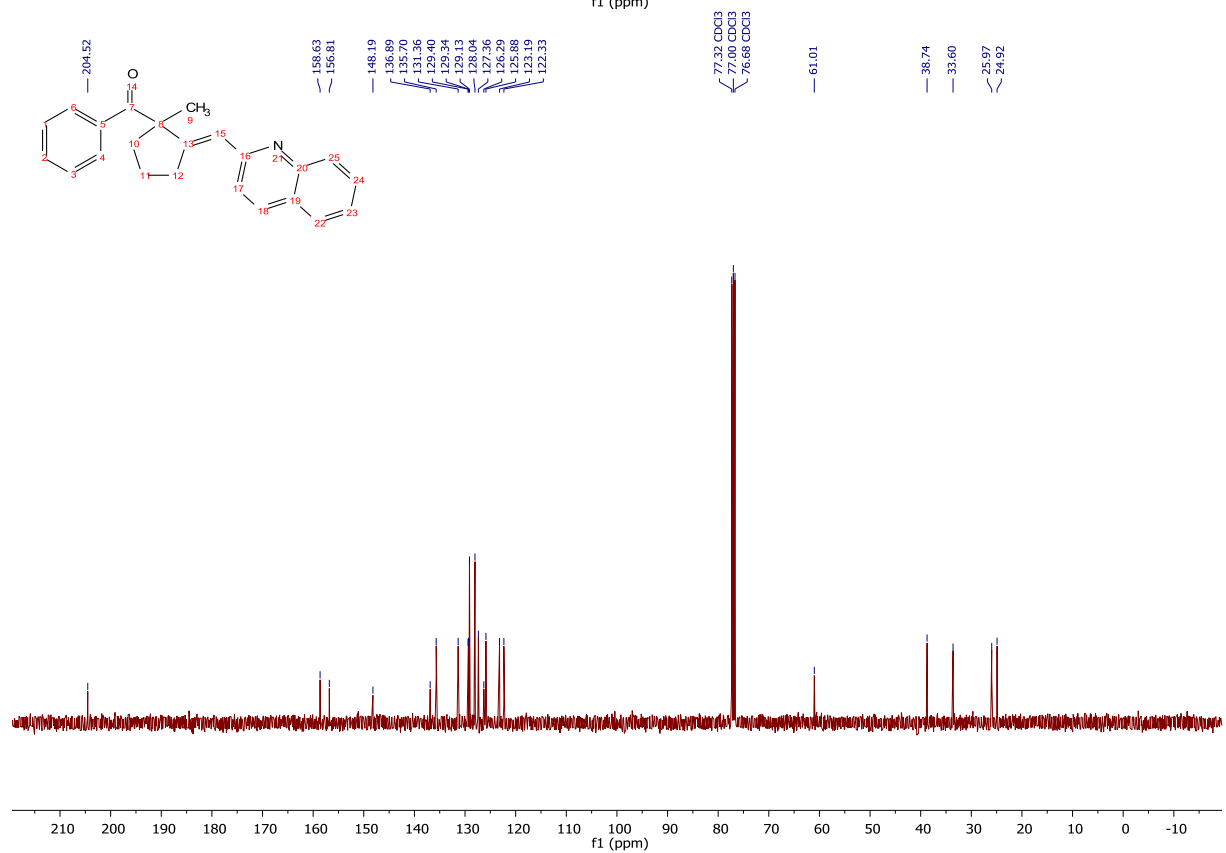

**(E)-2-((1H-indol-5-yl)methylene)-1-methylcyclopentyl(phenyl)methanone (23)**

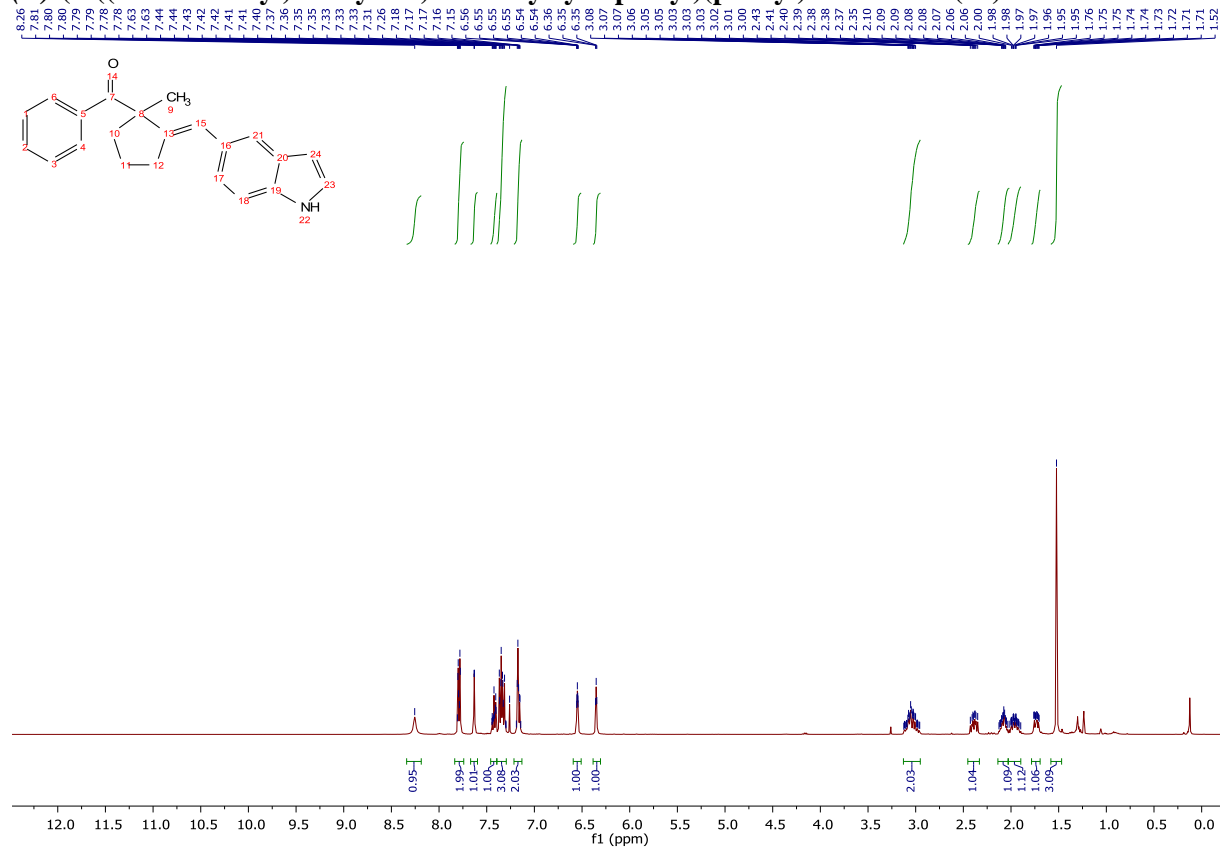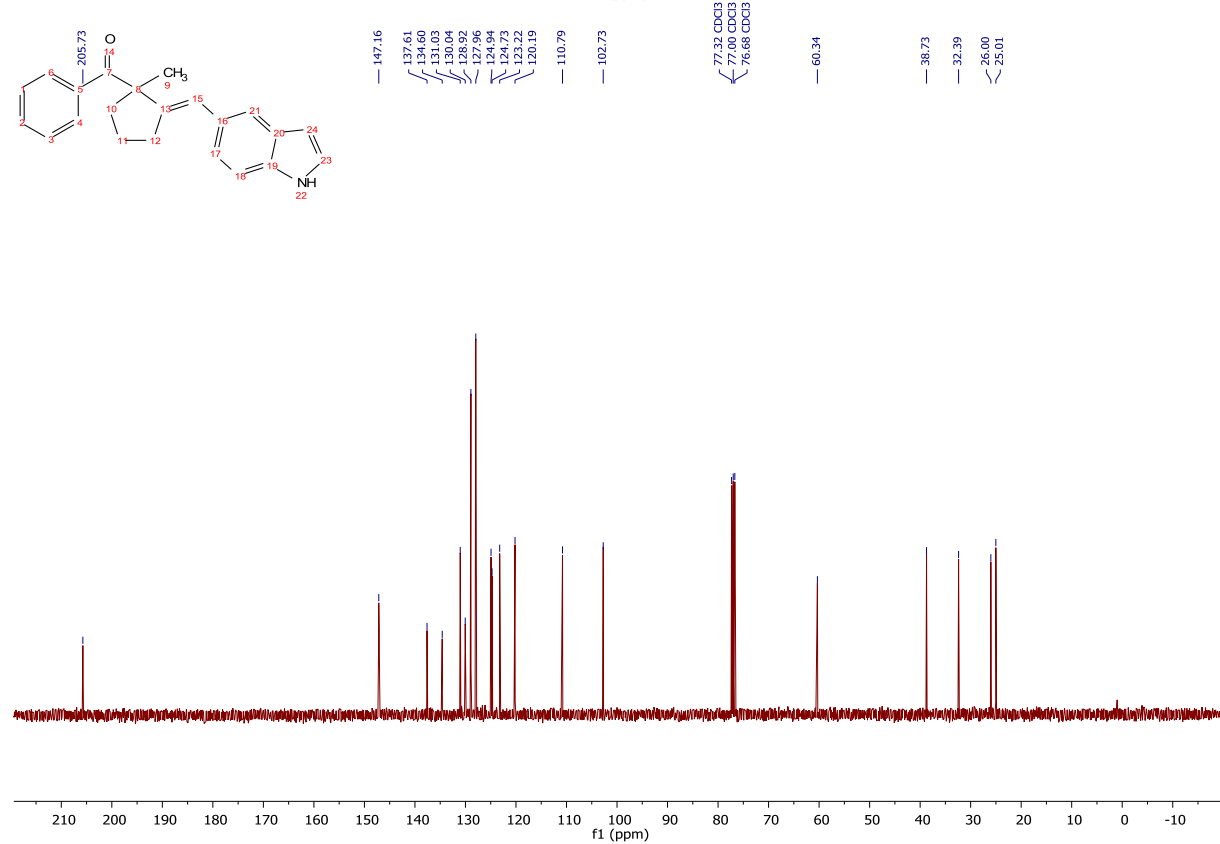

**(E)-2-(benzo[d][1,3]dioxol-5-ylmethylene)-1-methylcyclopentyl(phenyl)methanone (24)**

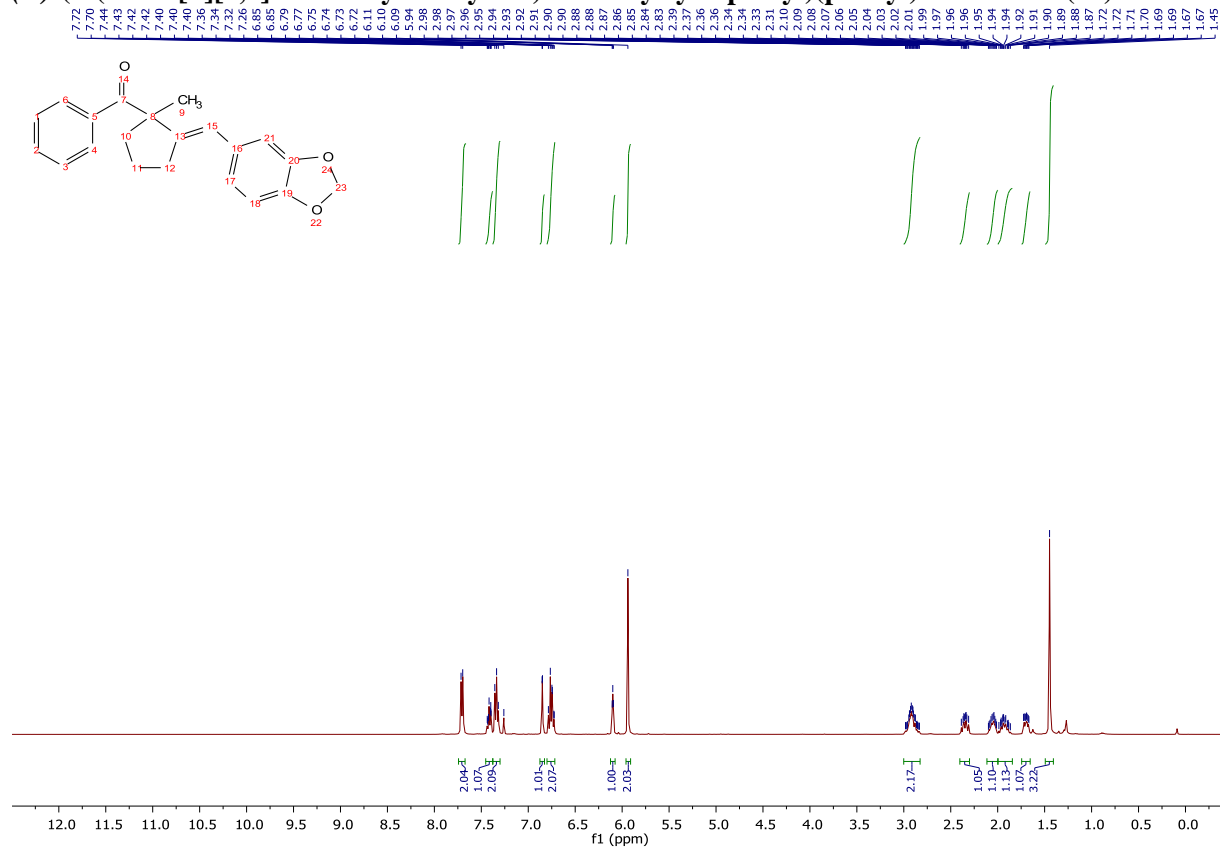

# (E)-(2-benzylidene-1-methylcyclopentyl)(p-tolyl)methanone (25)

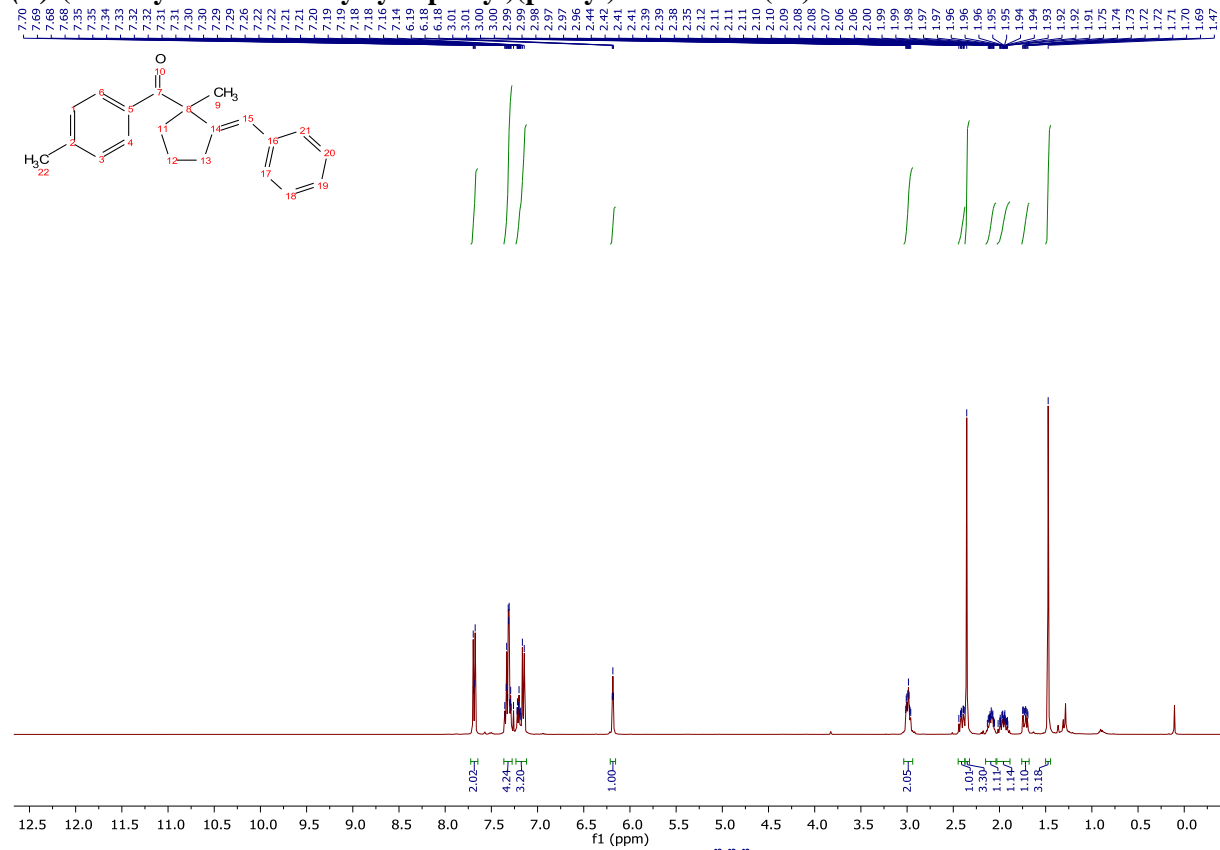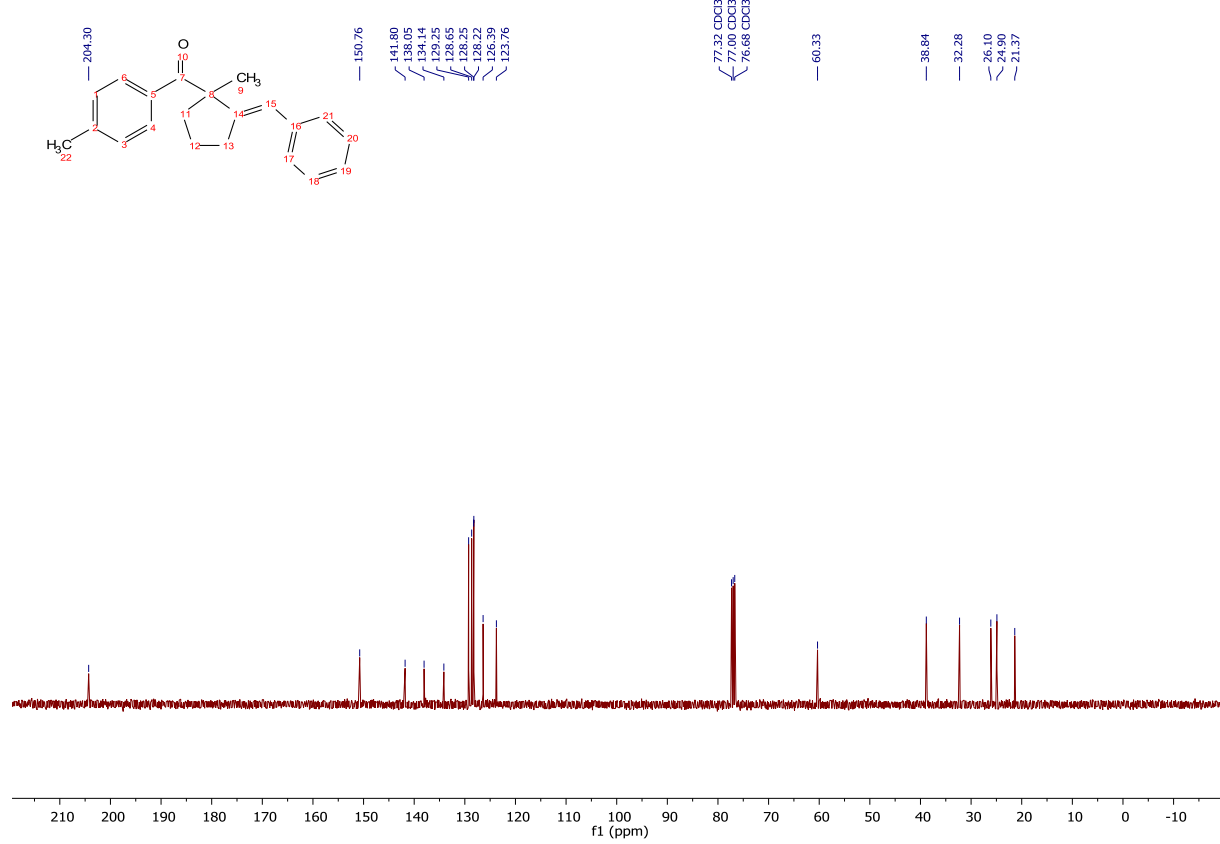

**(E)-2-(4-methoxybenzylidene)-1-methylcyclopentyl(p-tolyl)methanone (26)**

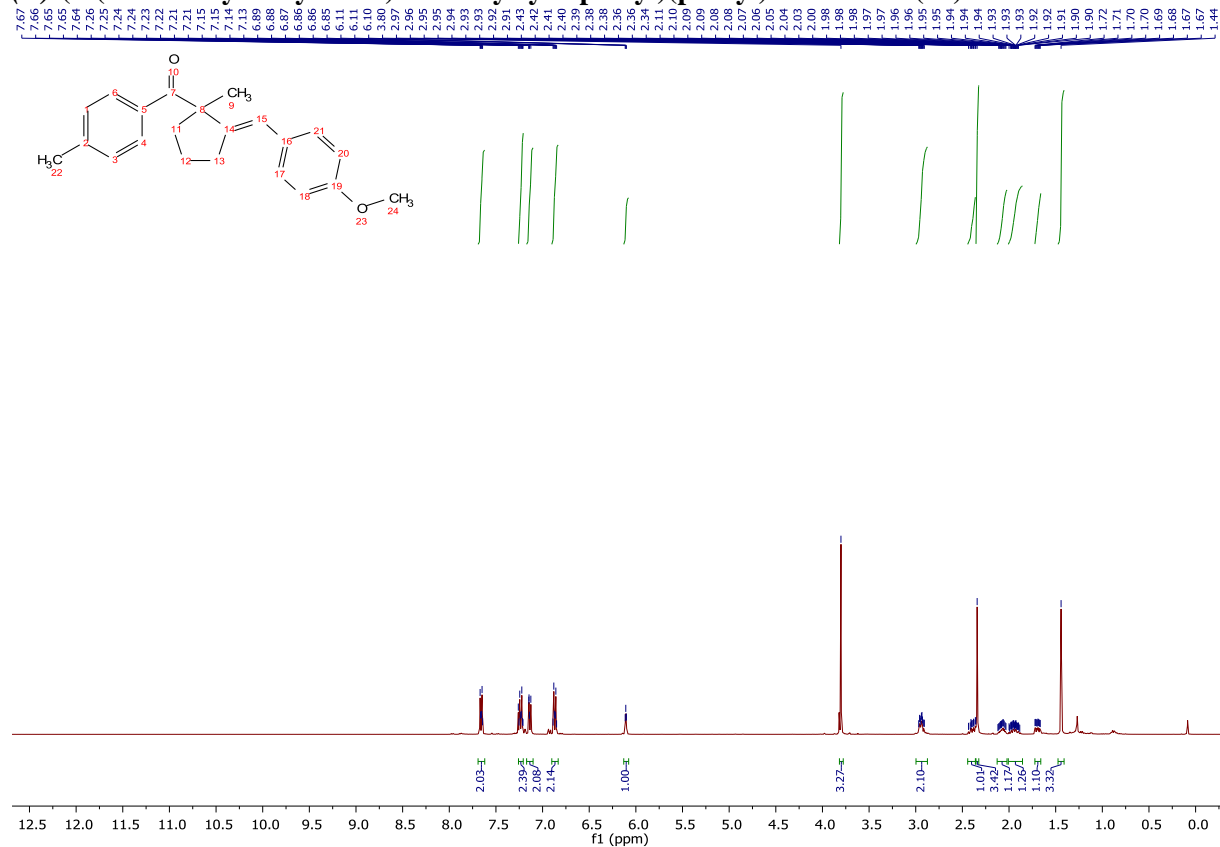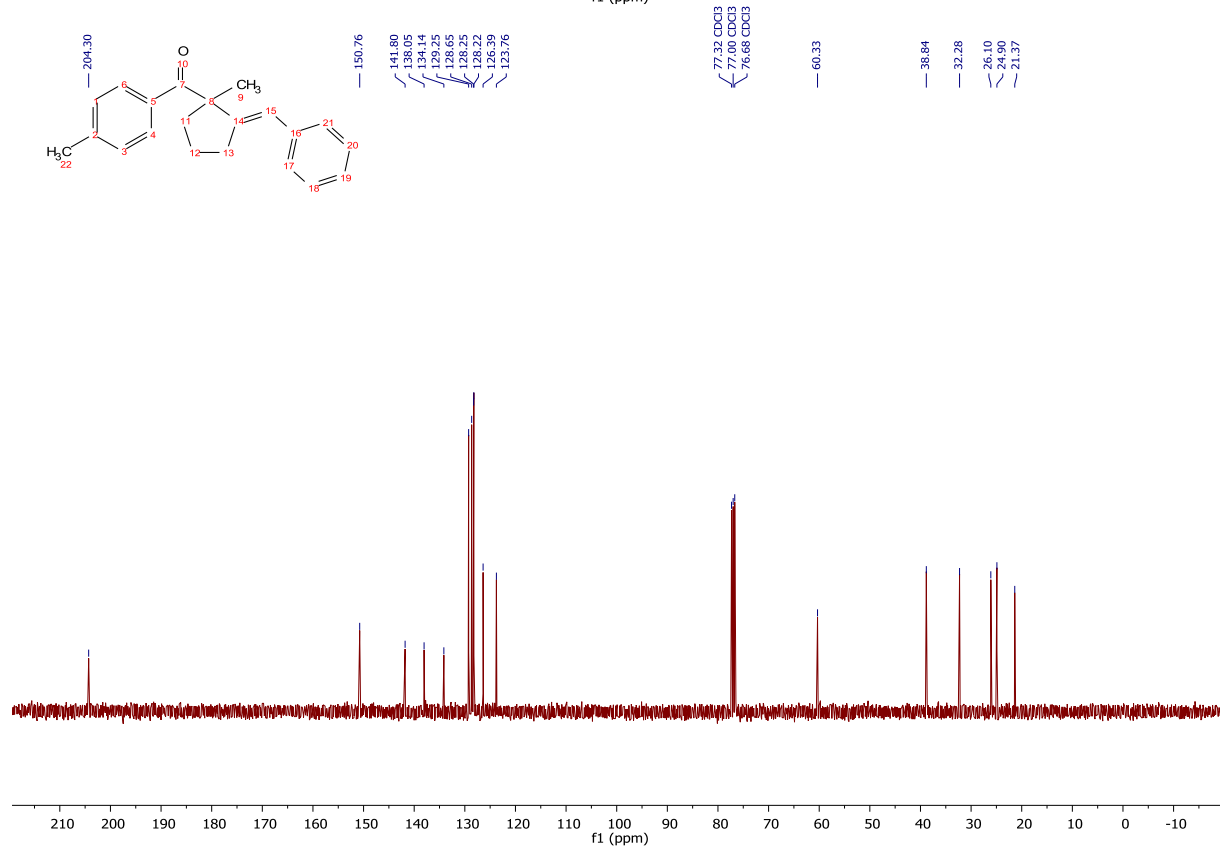



**(E)-4-((2-methyl-2-(4-methylbenzoyl)cyclopentylidene)methyl)benzotrile (27)**

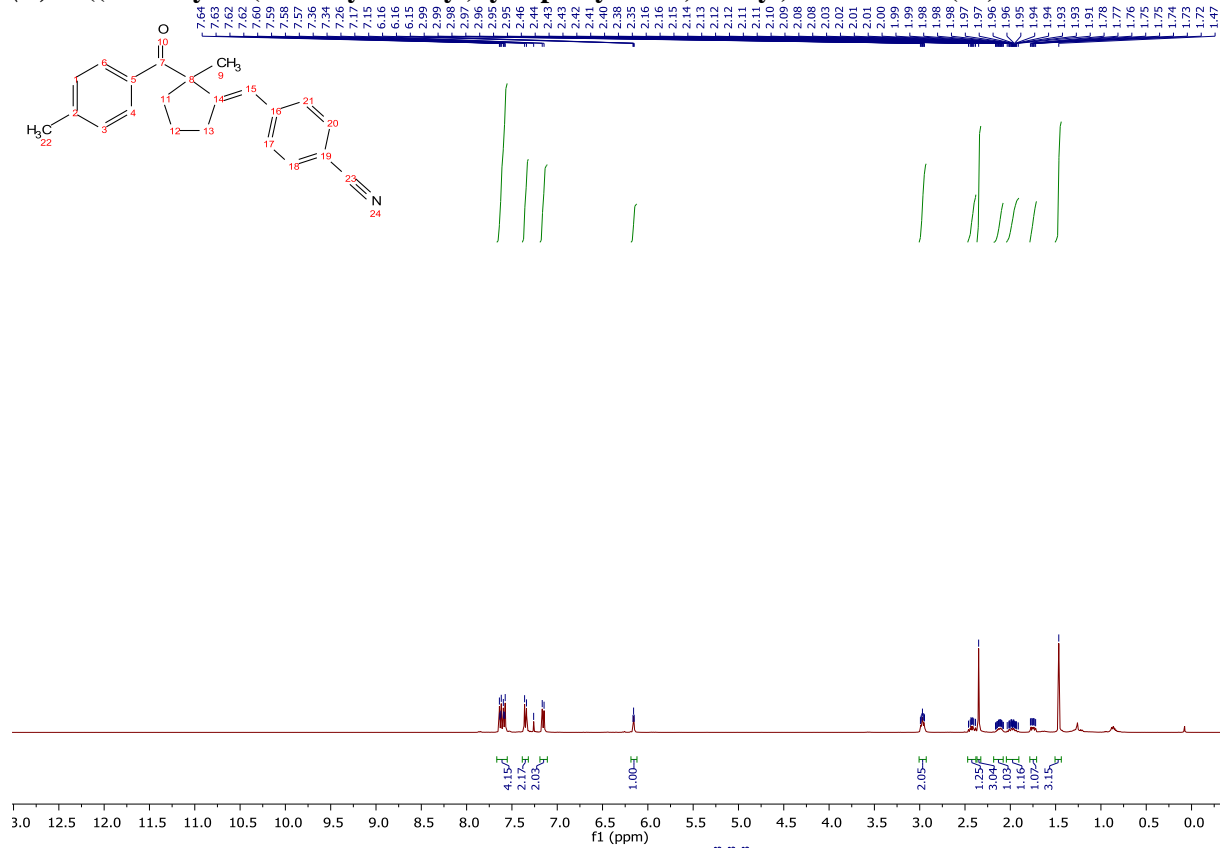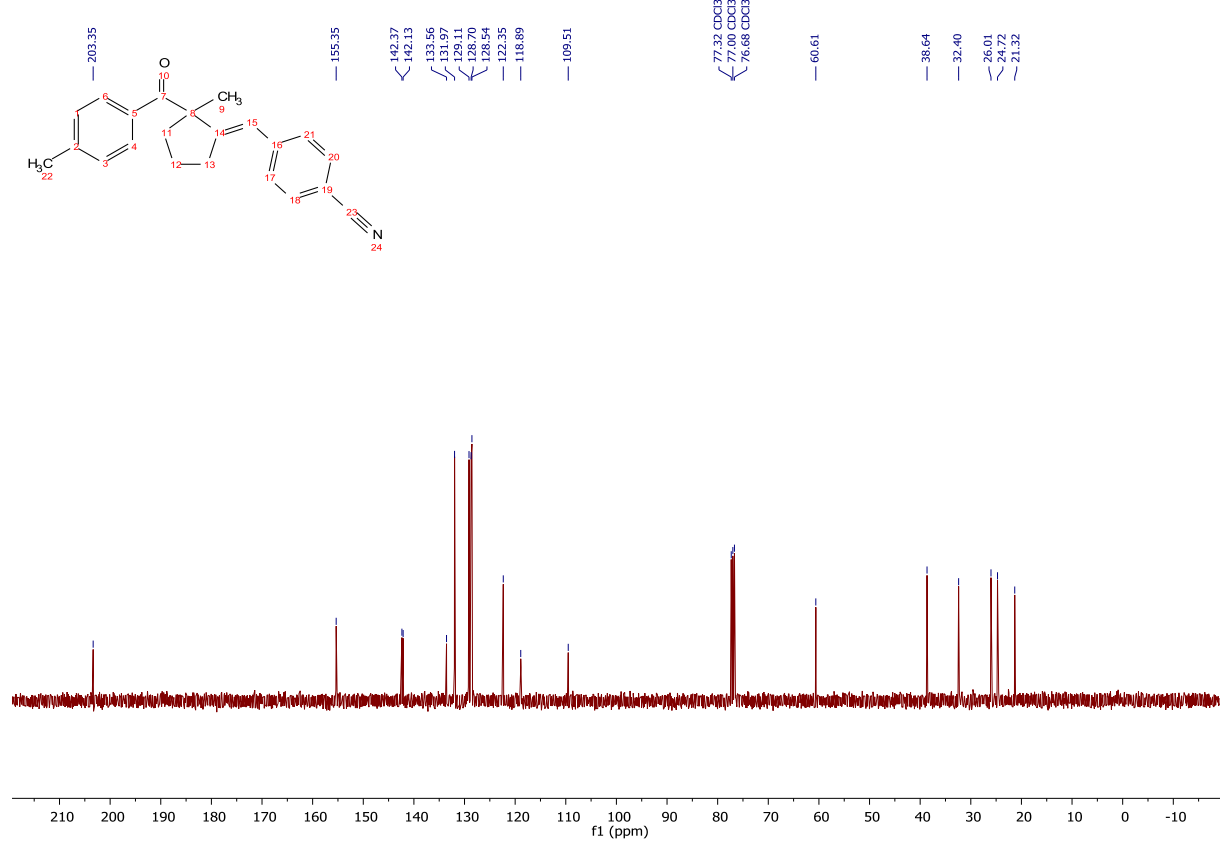

# (E)-(2-benzylidene-1-methylcyclopentyl)(4-fluorophenyl)methanone (28)

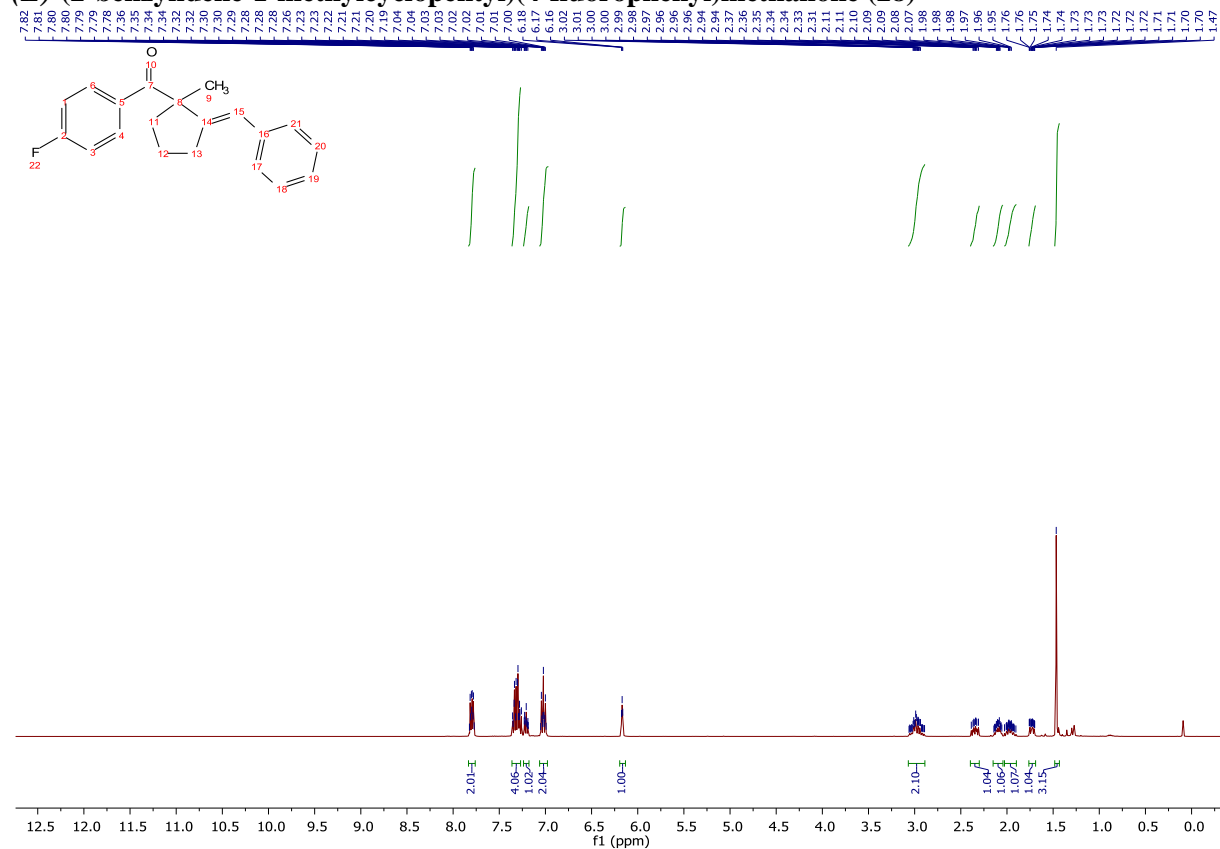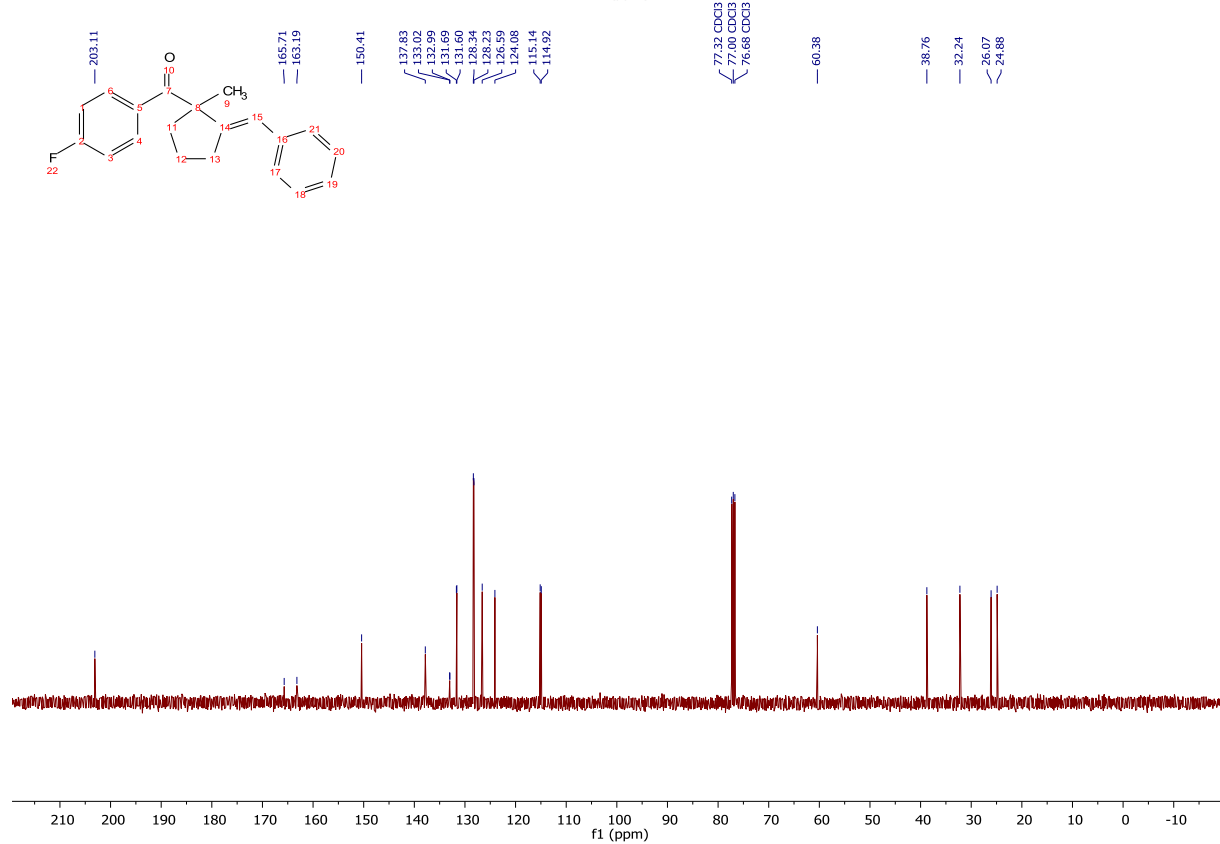

**(E)-(4-fluorophenyl)(2-(4-methoxybenzylidene)-1-methylcyclopentyl)methanone (29)**

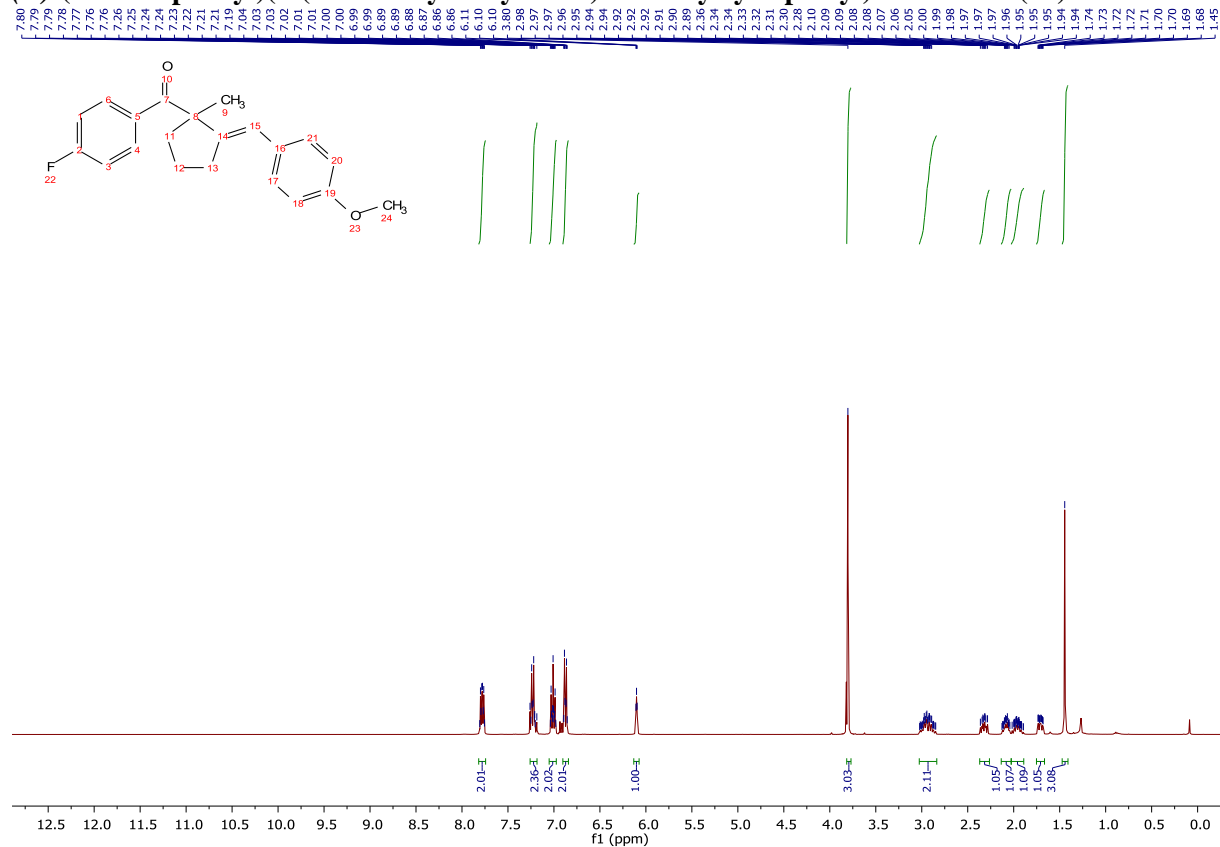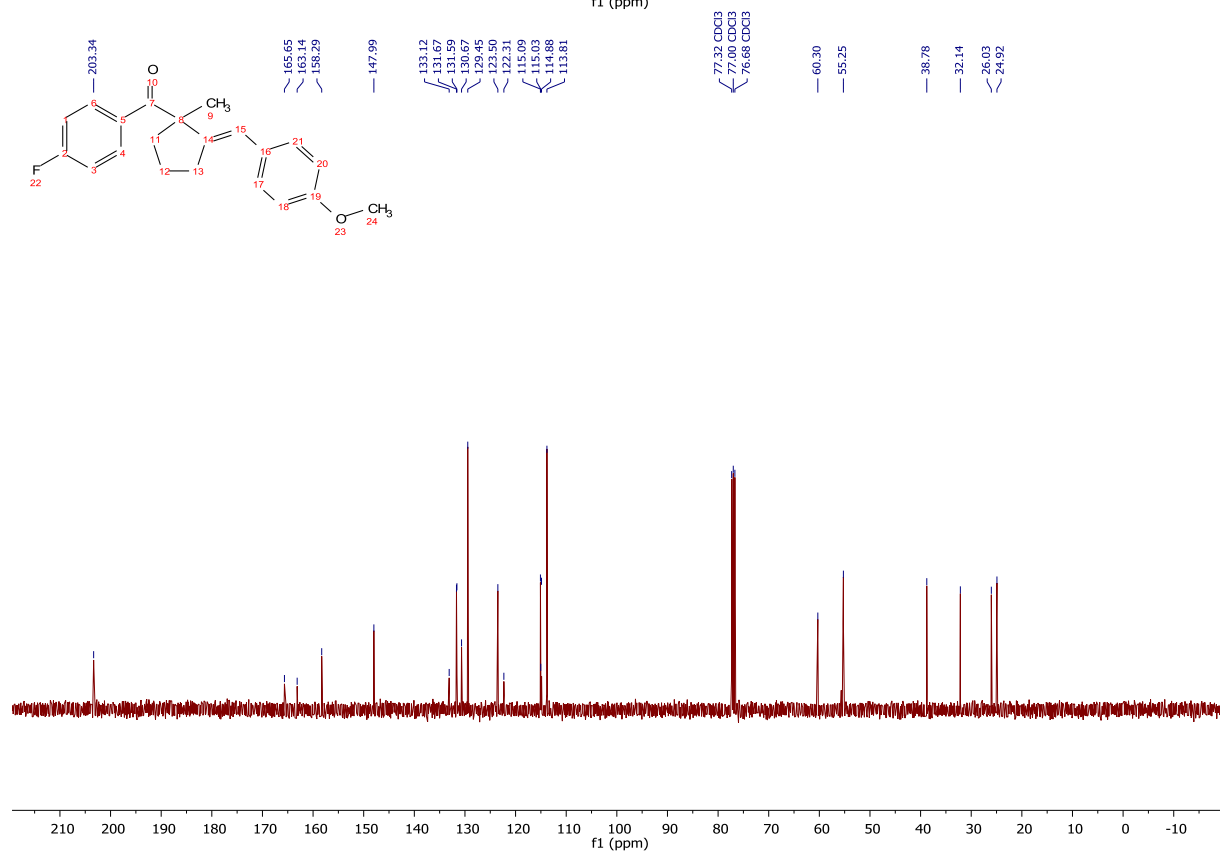

**(E)-4-((2-(4-fluorobenzoyl)-2-methylcyclopentylidene)methyl)benzonitrile (30)**

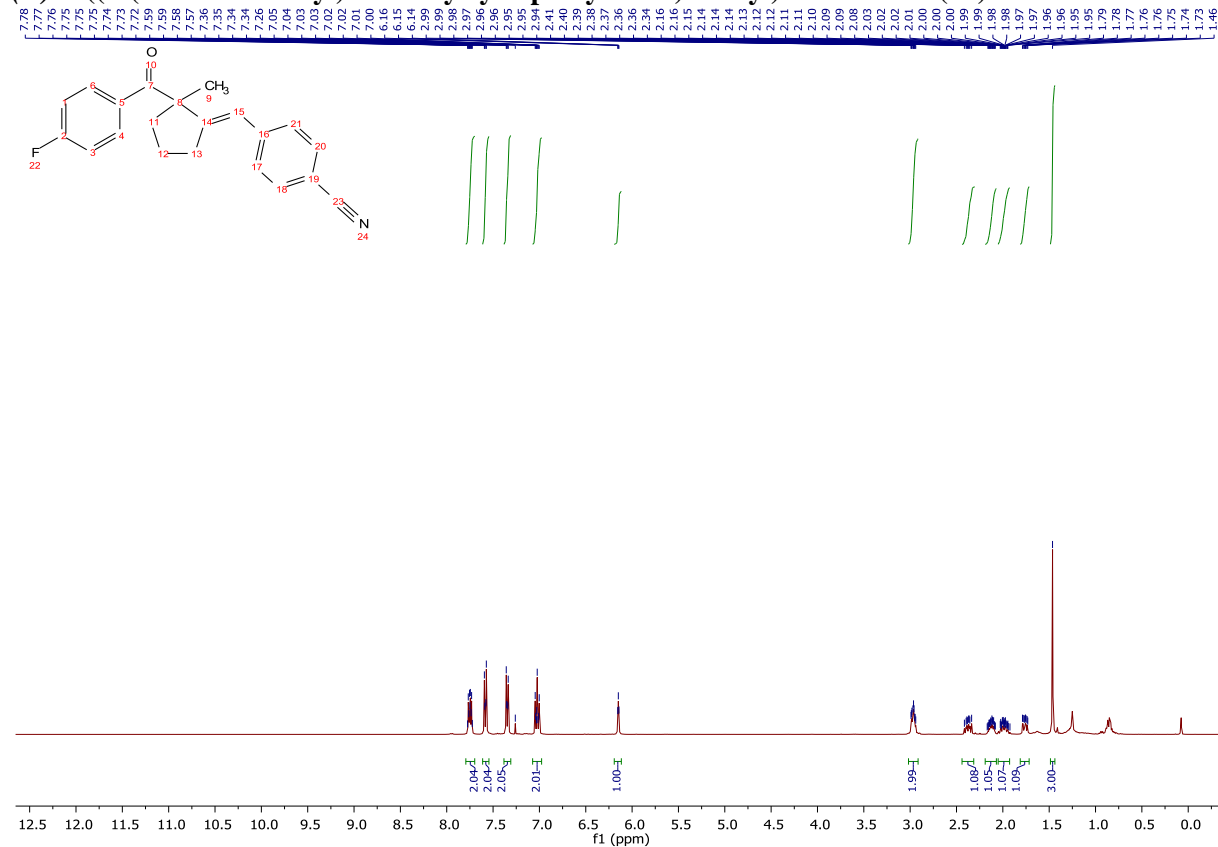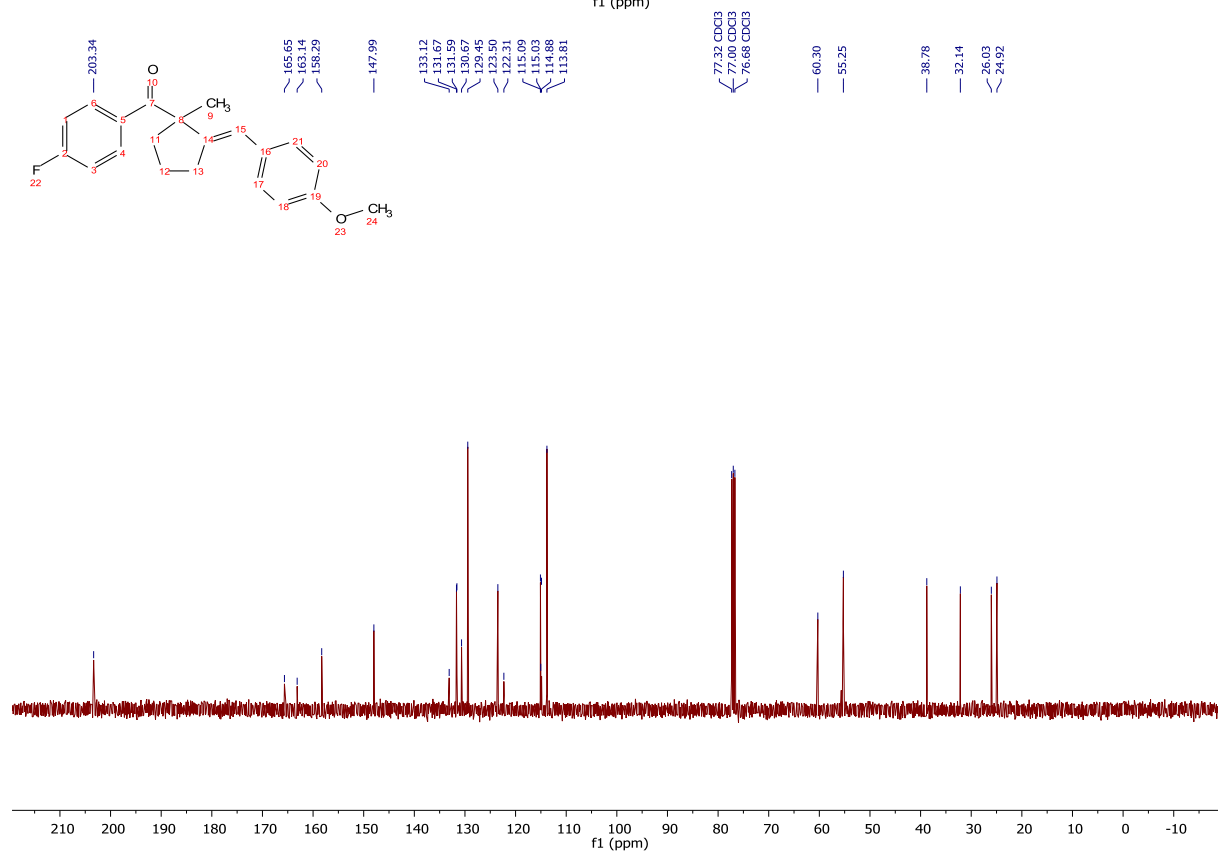

**(E)-(2-benzylidene-1-methylcyclopentyl)(4-methoxyphenyl)methanone (31)**

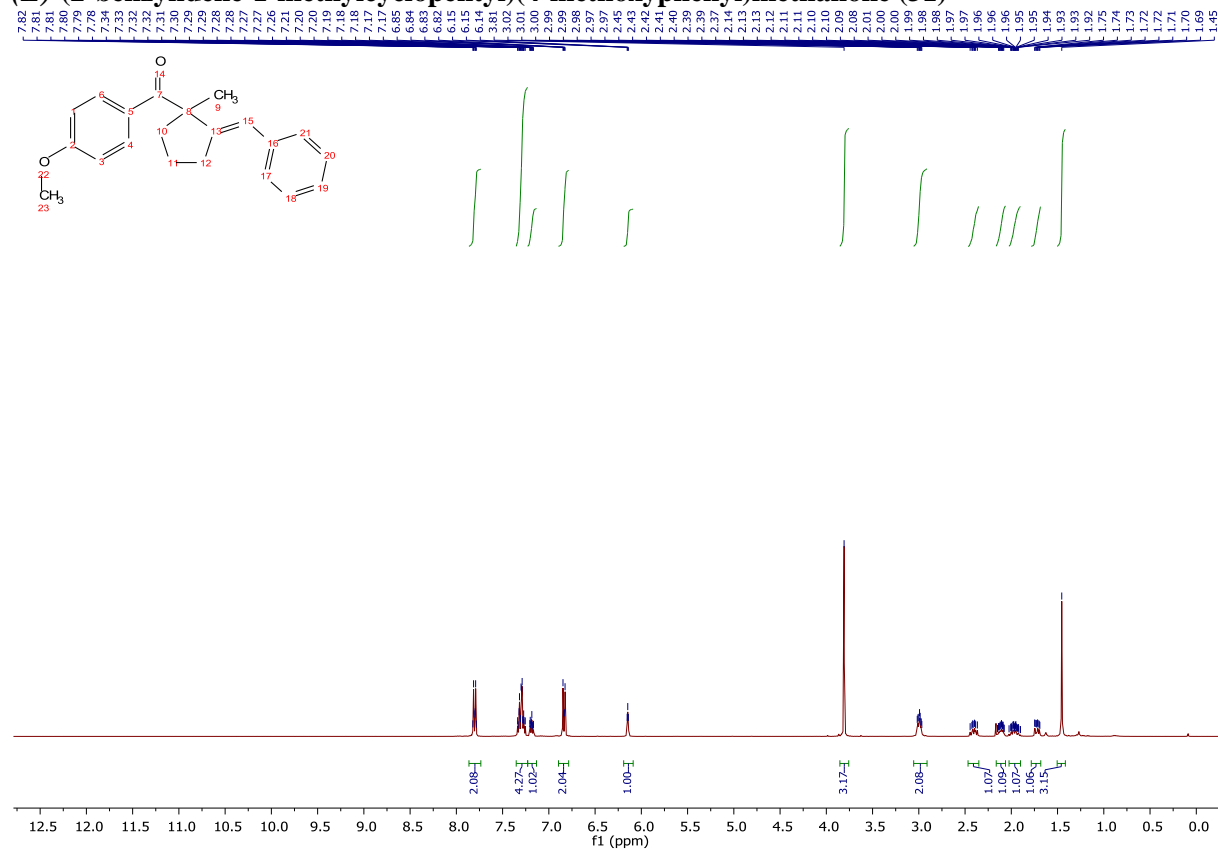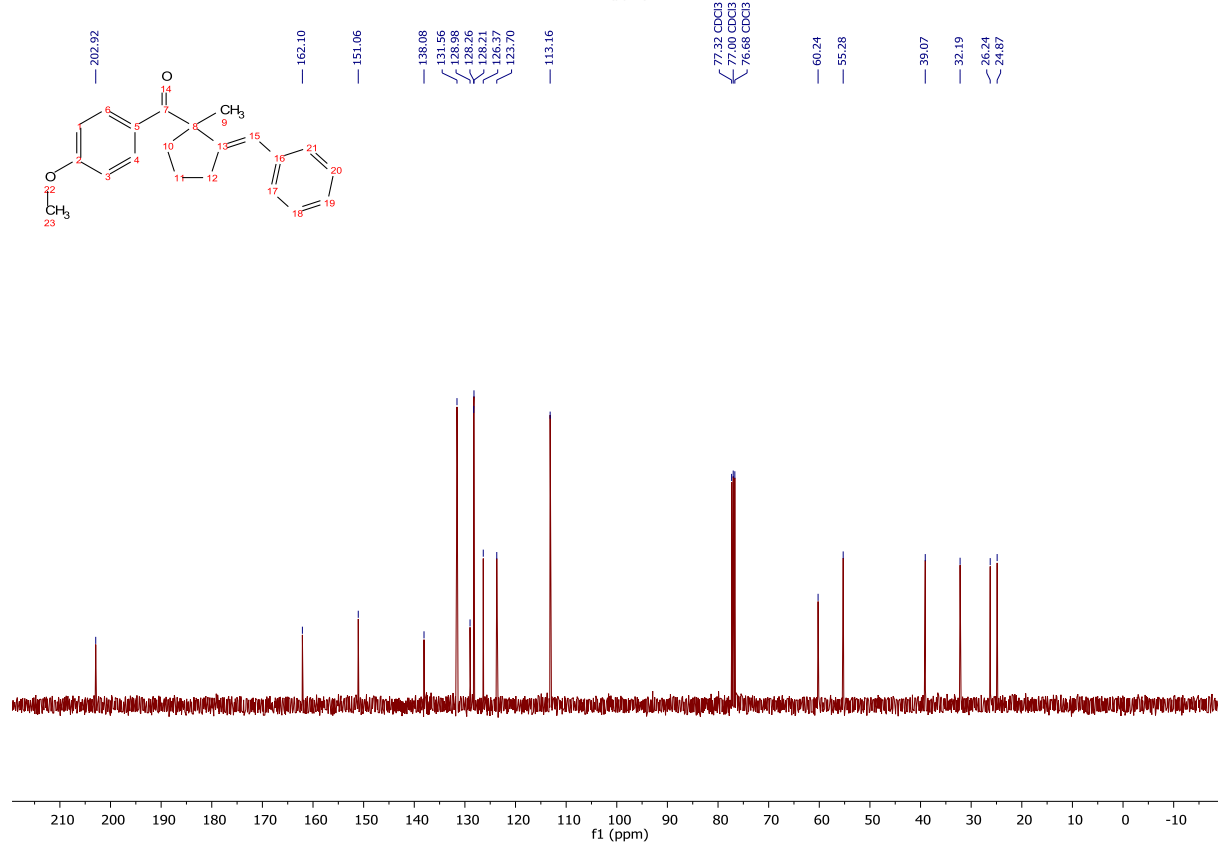

**(E)-2-(4-methoxybenzylidene)-1-methylcyclopentyl(4-methoxyphenyl)methanone (32)**

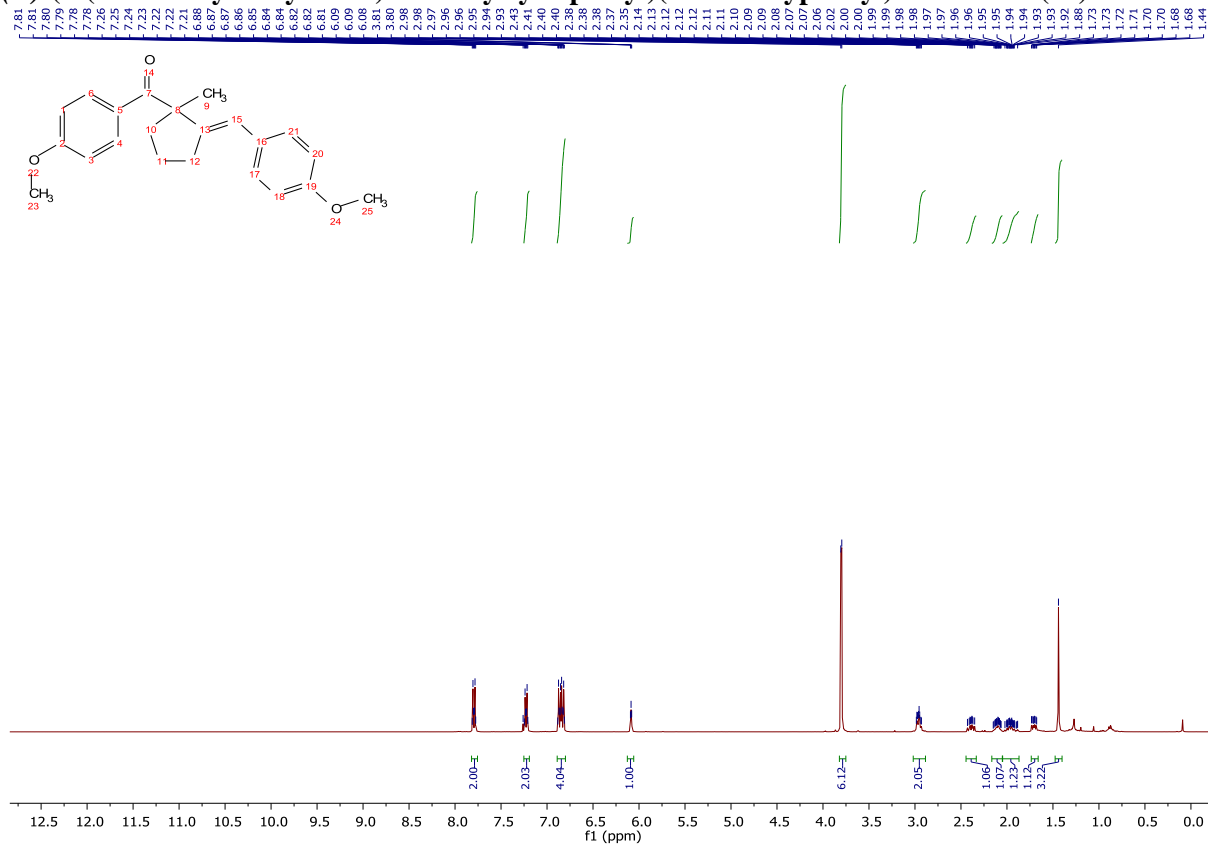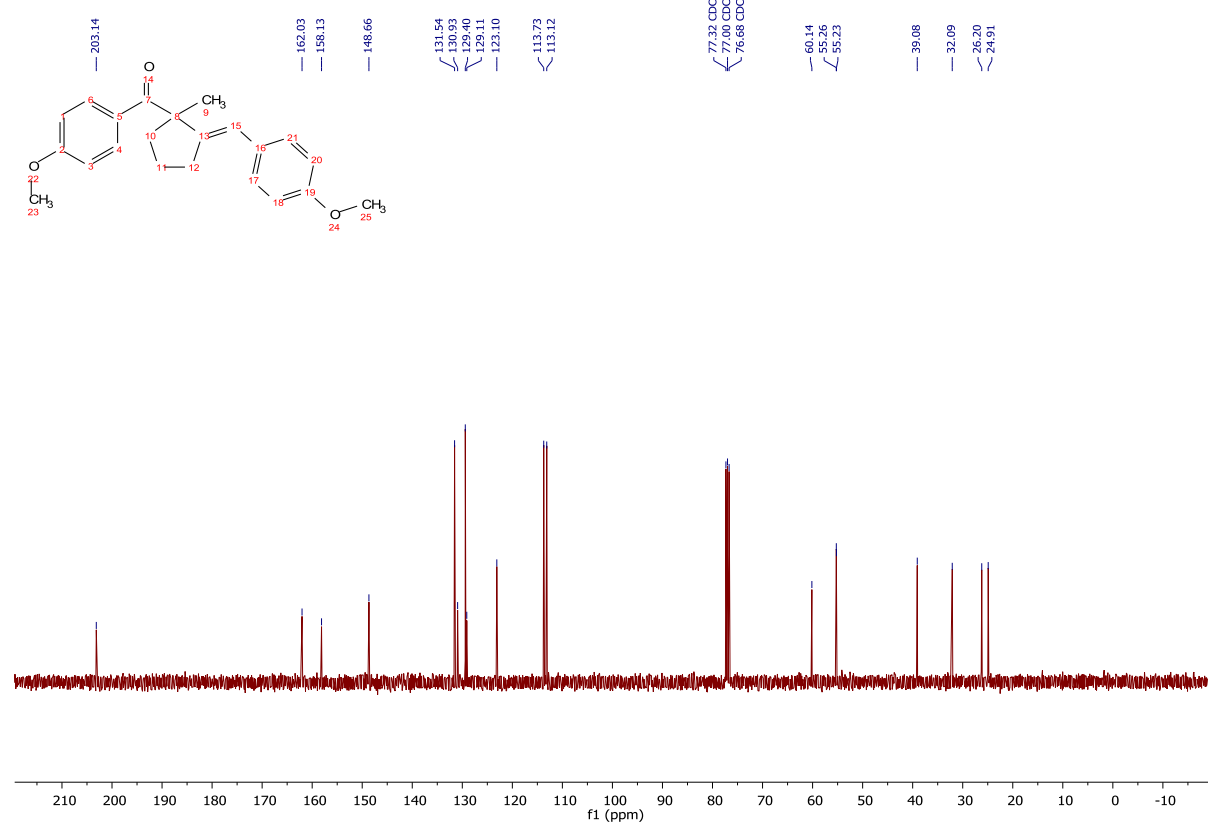

**(E)-(2-benzylidene-1-methoxycyclopentyl)(phenyl)methanone (33)**

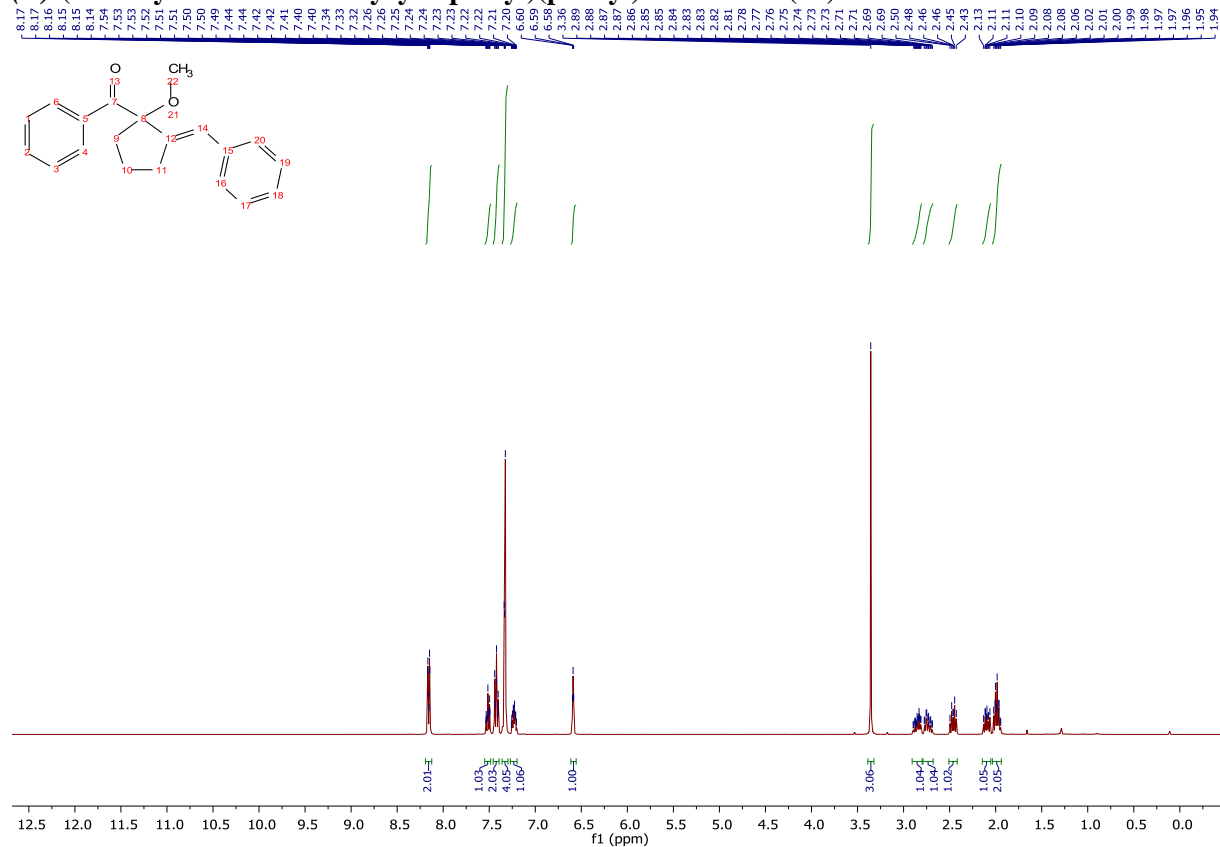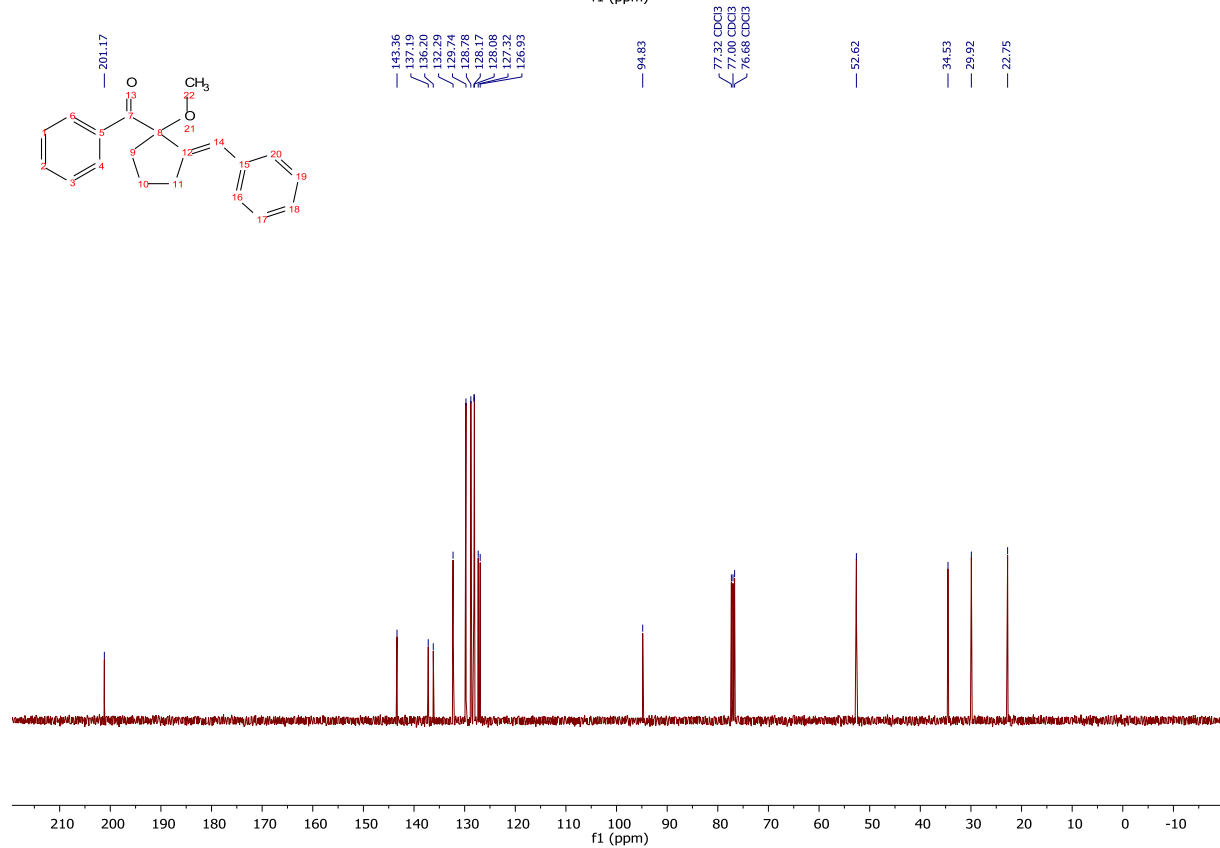

**(E)-(1-methoxy-2-(4-methoxybenzylidene)cyclopentyl)(phenyl)methanone (34)**

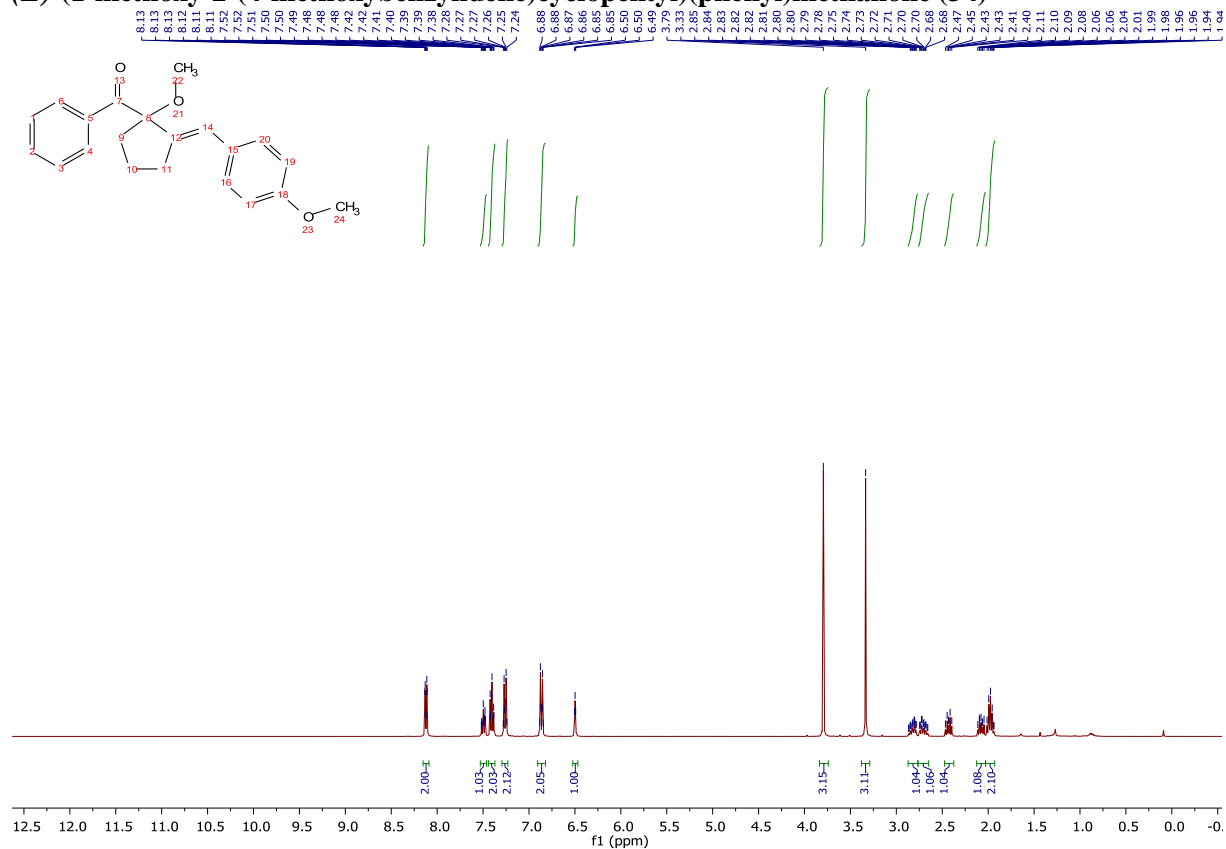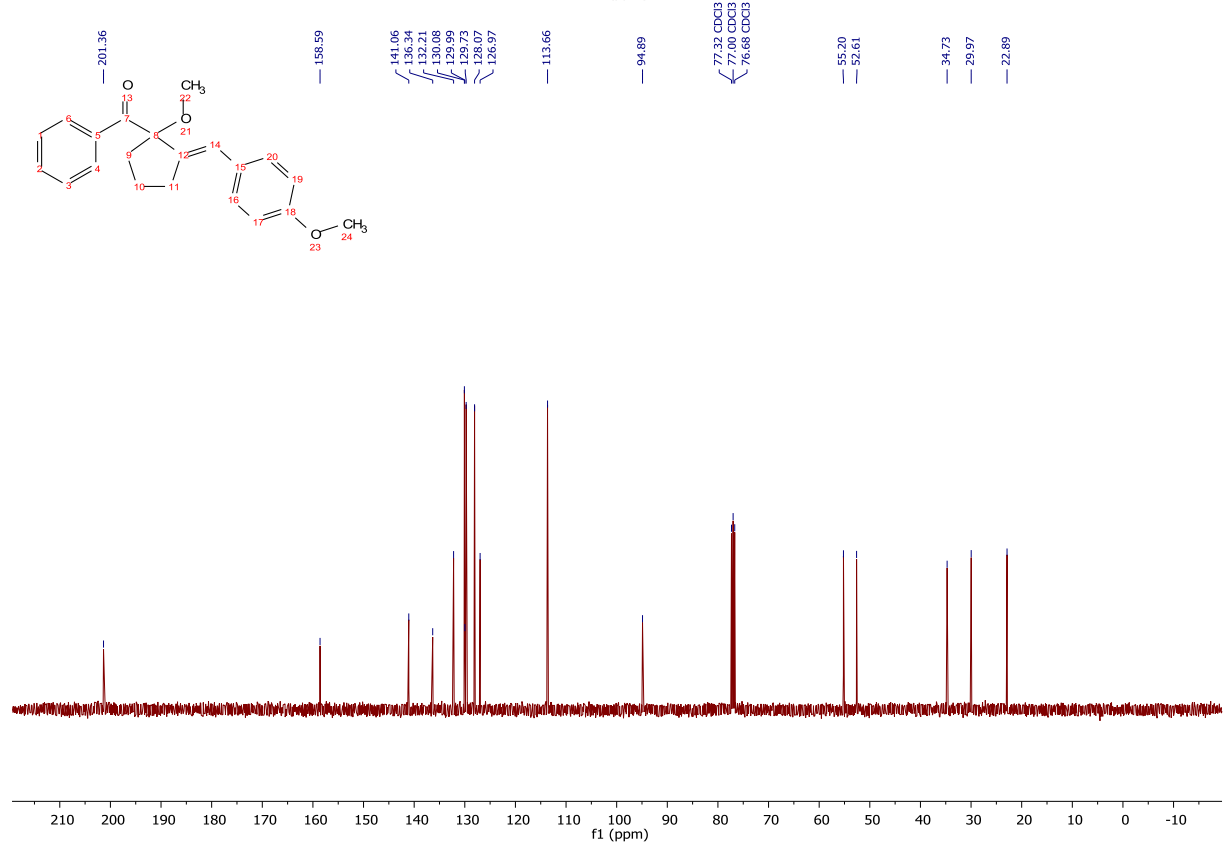



**(E)-4-((2-benzoyl-2-methoxycyclopentylidene)methyl)benzonitrile (35)**

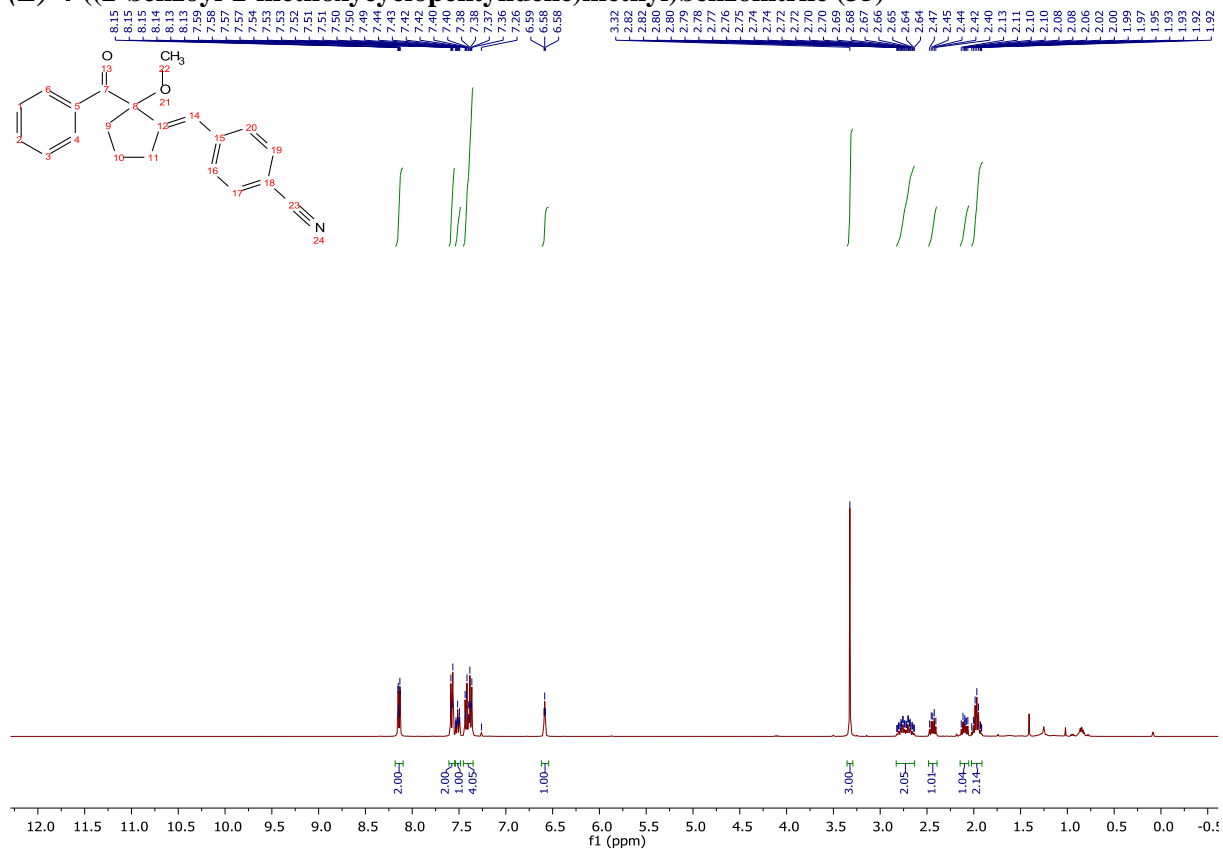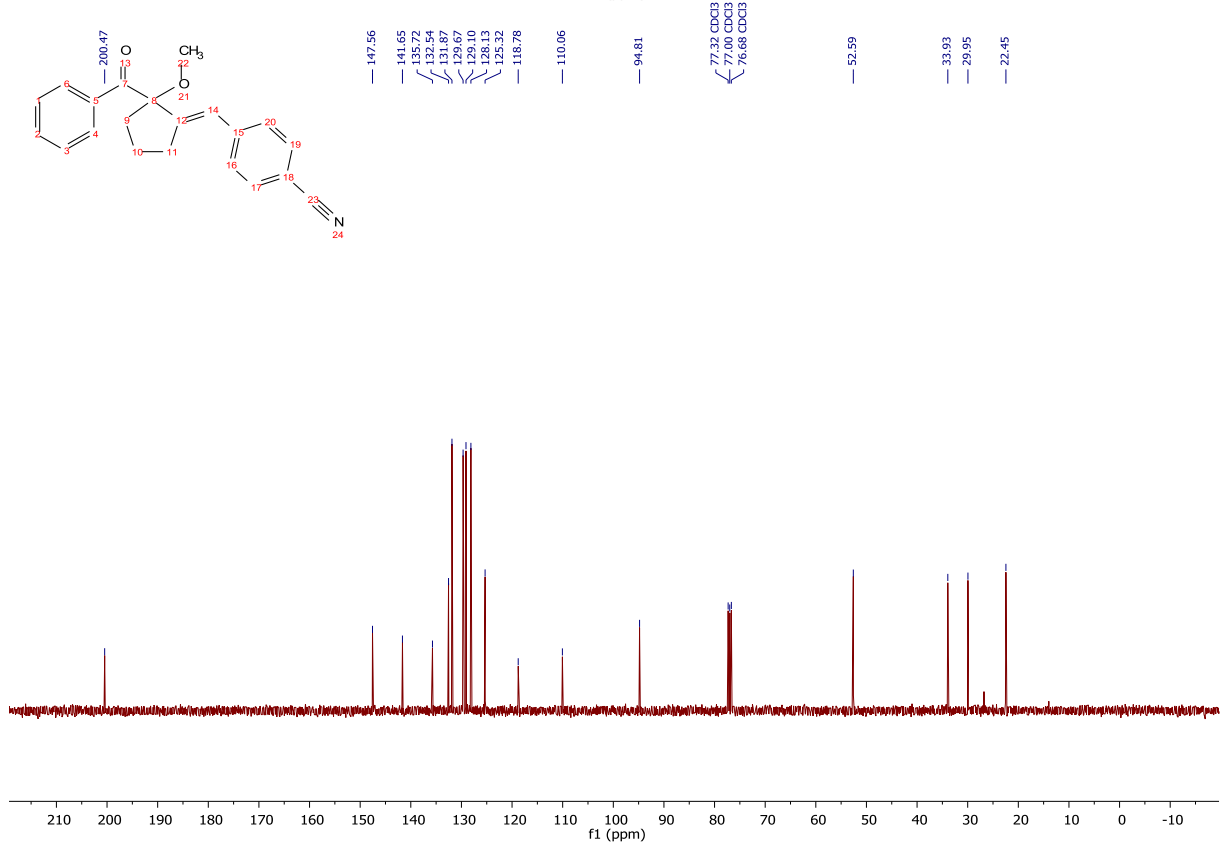

# (E)-(2-benzylidene-1-phenylcyclopentyl)(phenyl)methanone (36)

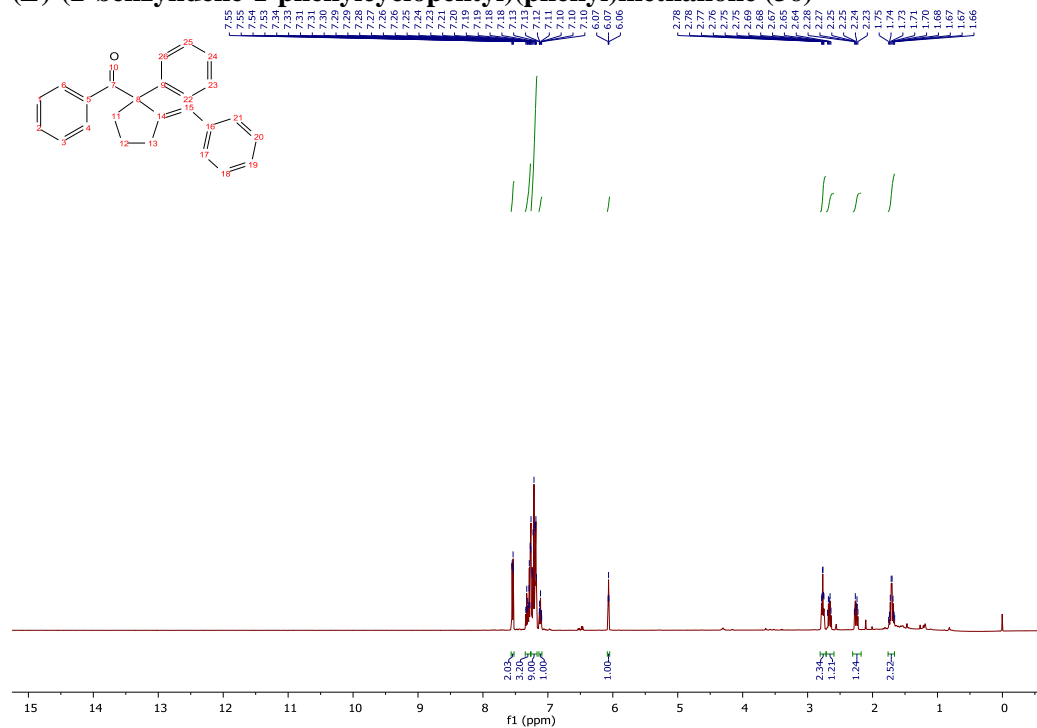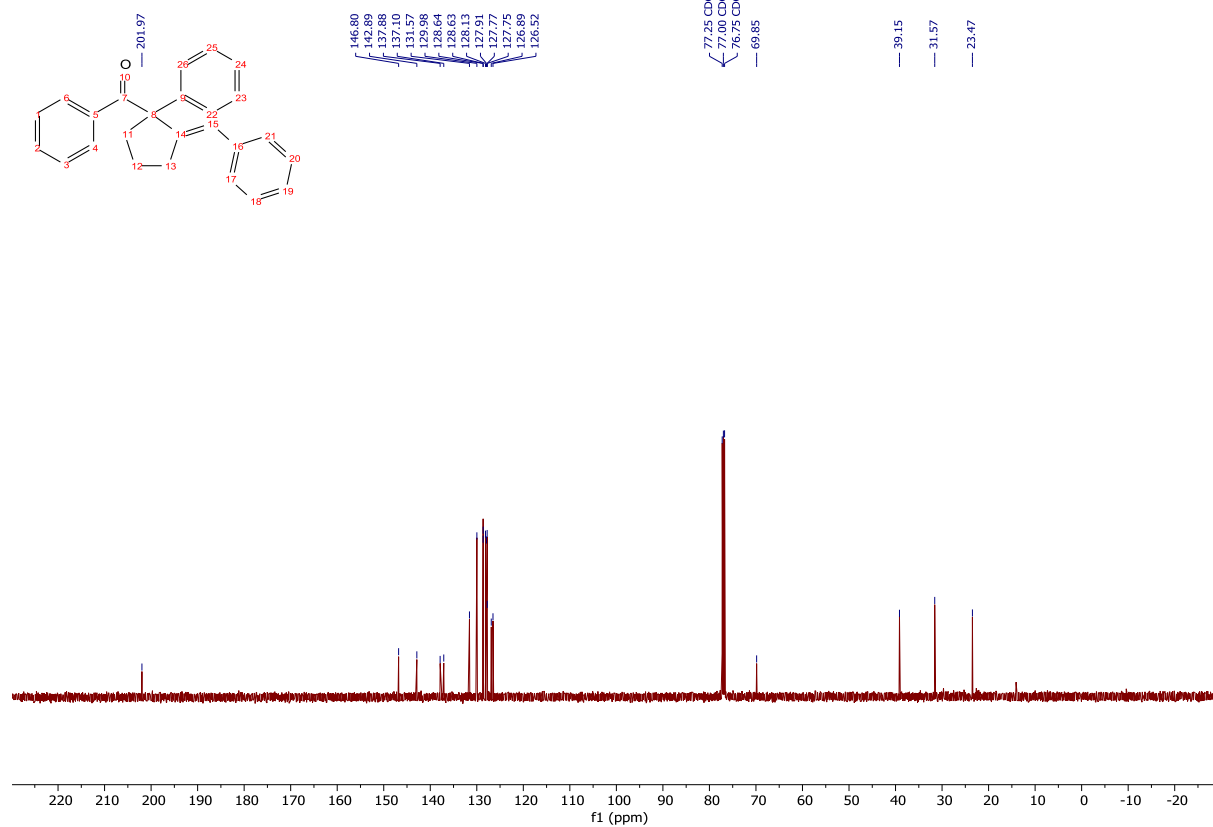

**(E)-2-(2-(4-methoxybenzylidene)-1-phenylcyclopentyl)(phenyl)methanone (37)**

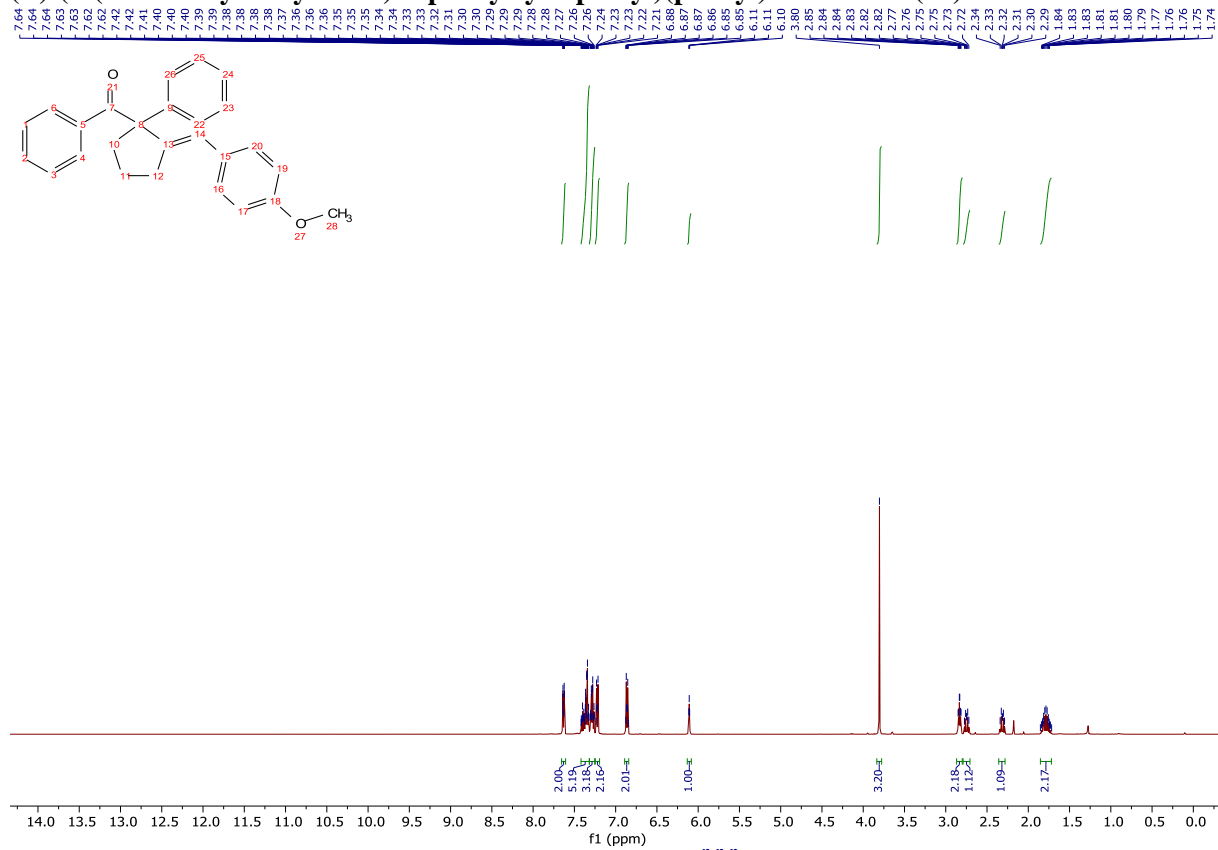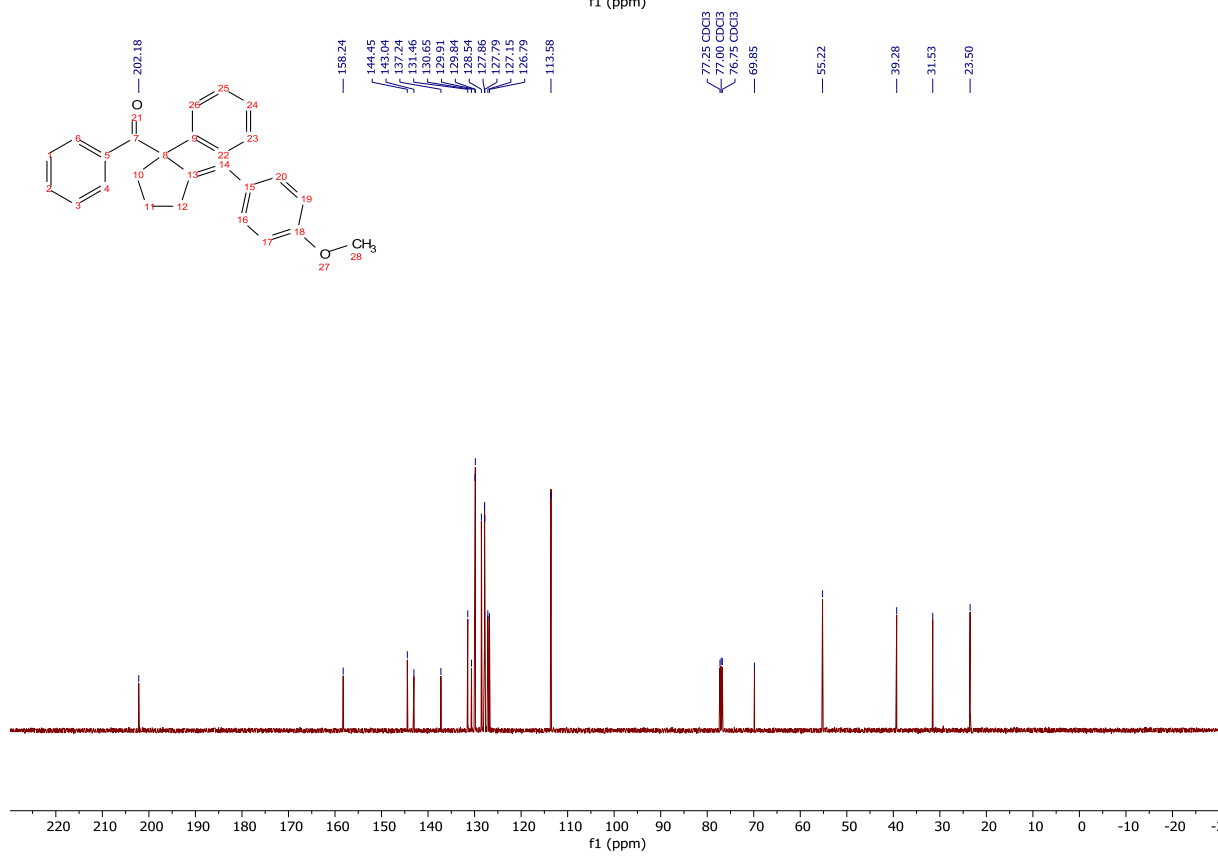

**(E)-(2-benzylidene-1-ethylcyclopentyl)(phenyl)methanone (38)**

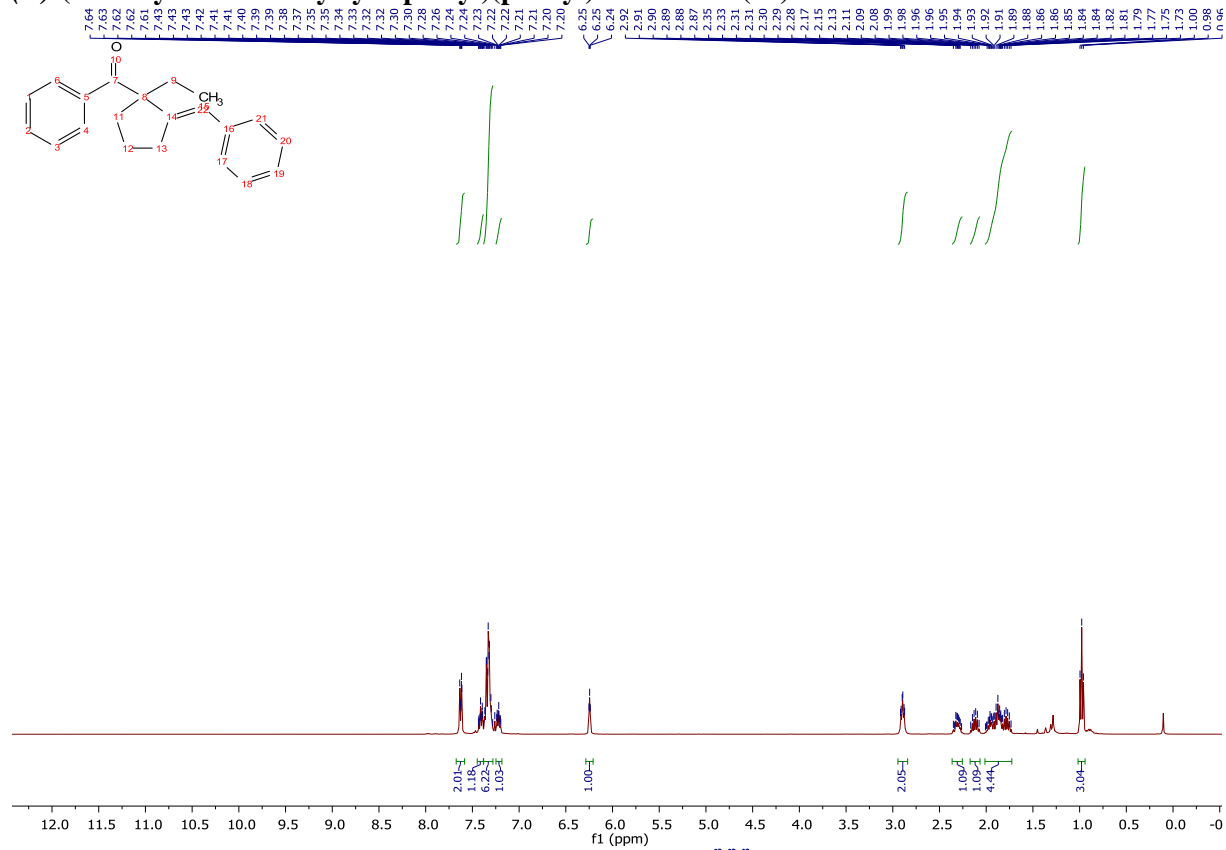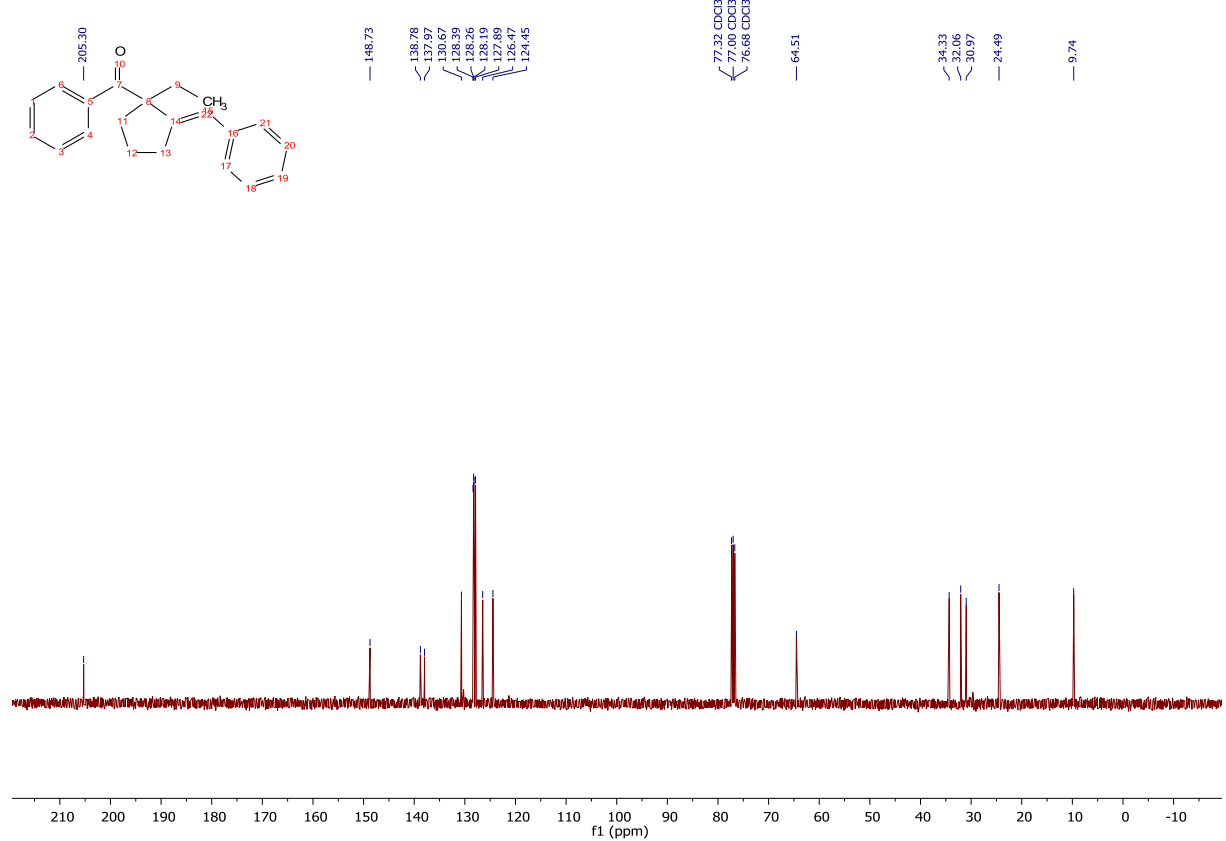

**(E)-(1-ethyl-2-(4-methoxybenzylidene)cyclopentyl)(phenyl)methanone (39)**

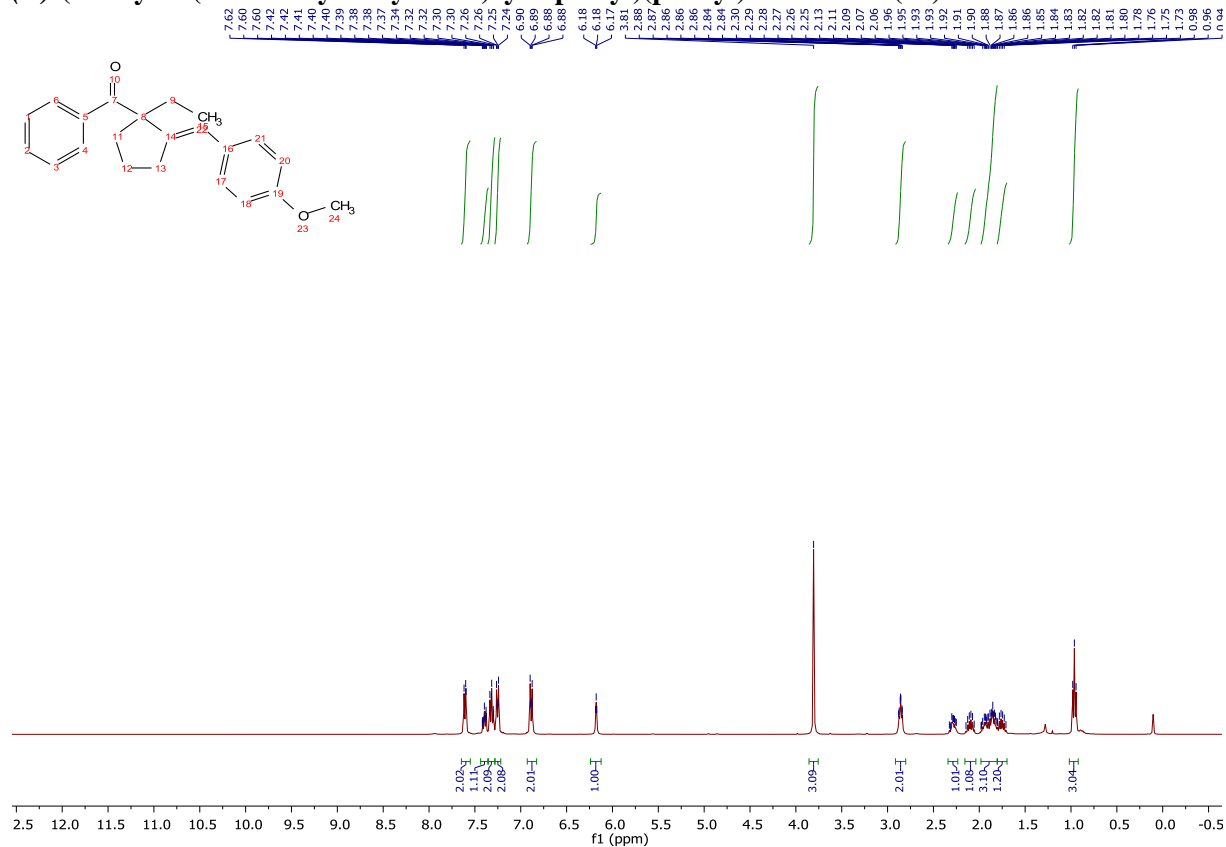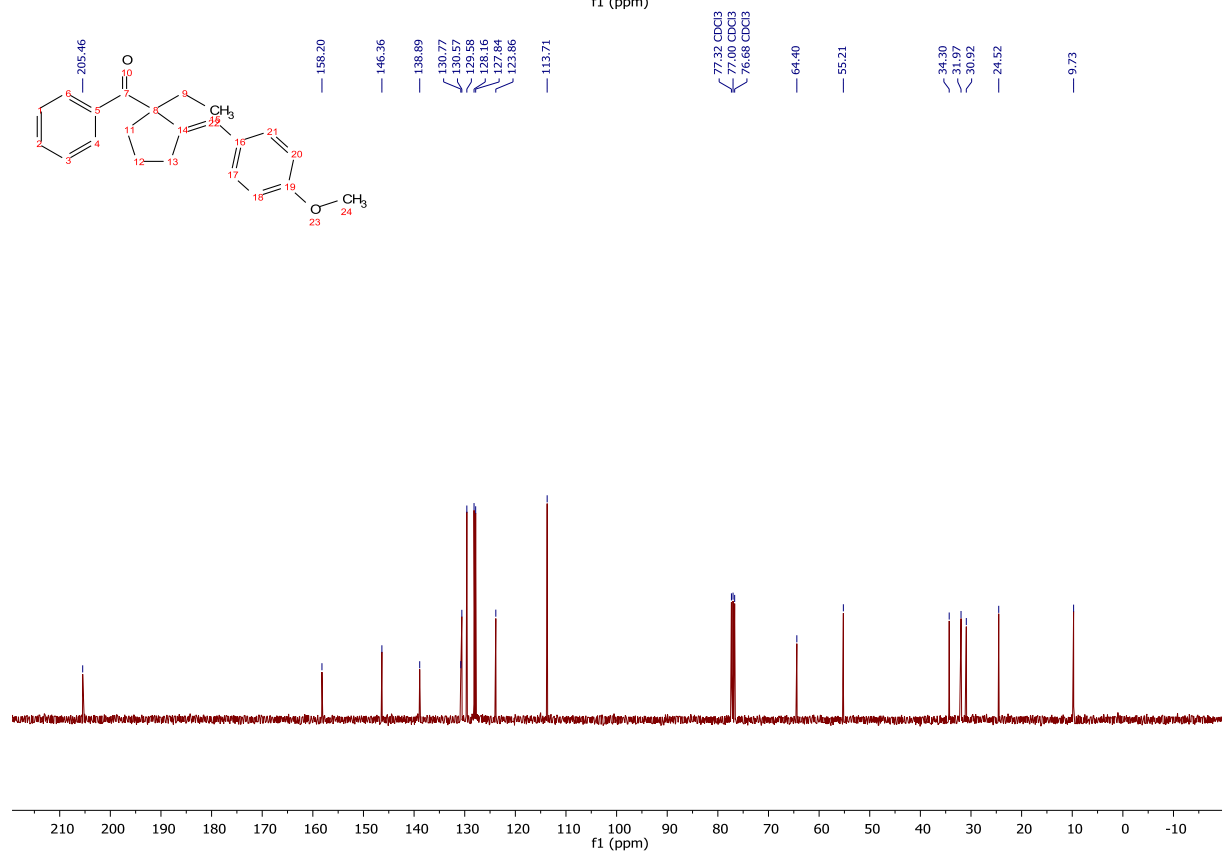

**(E)-4-((2-benzoyl-2-ethylcyclopentylidene)methyl)benzonitrile (40)**

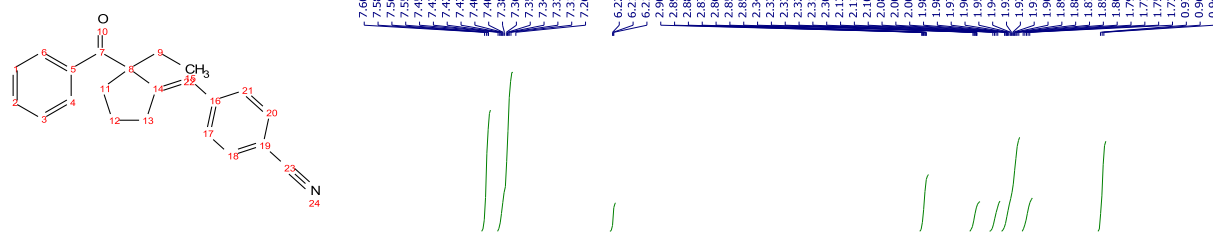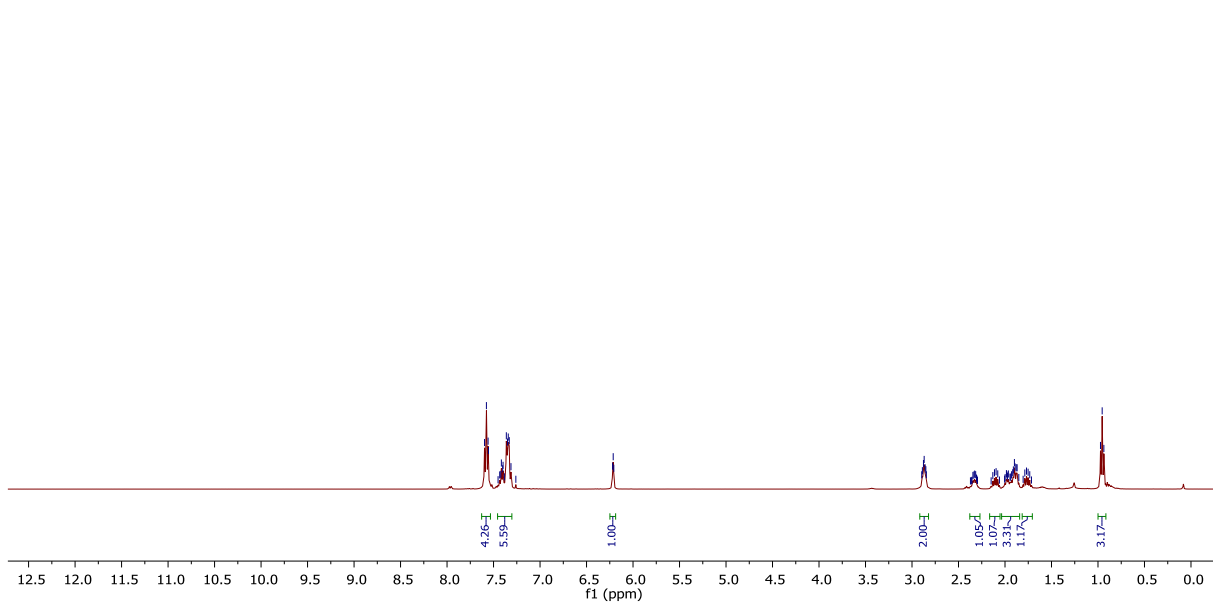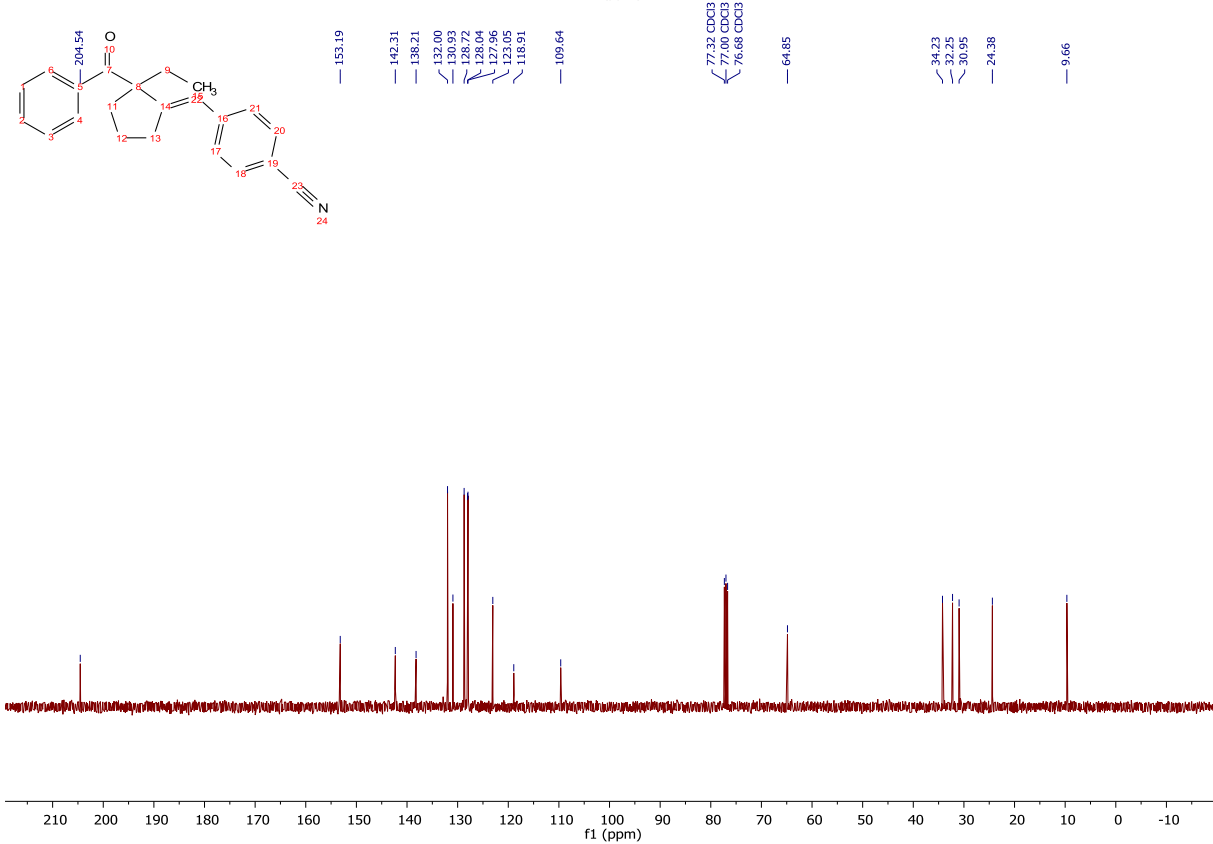

**(E)-(1-isopropyl-2-(4-methoxybenzylidene)cyclopentyl)(phenyl)methanone (41)**

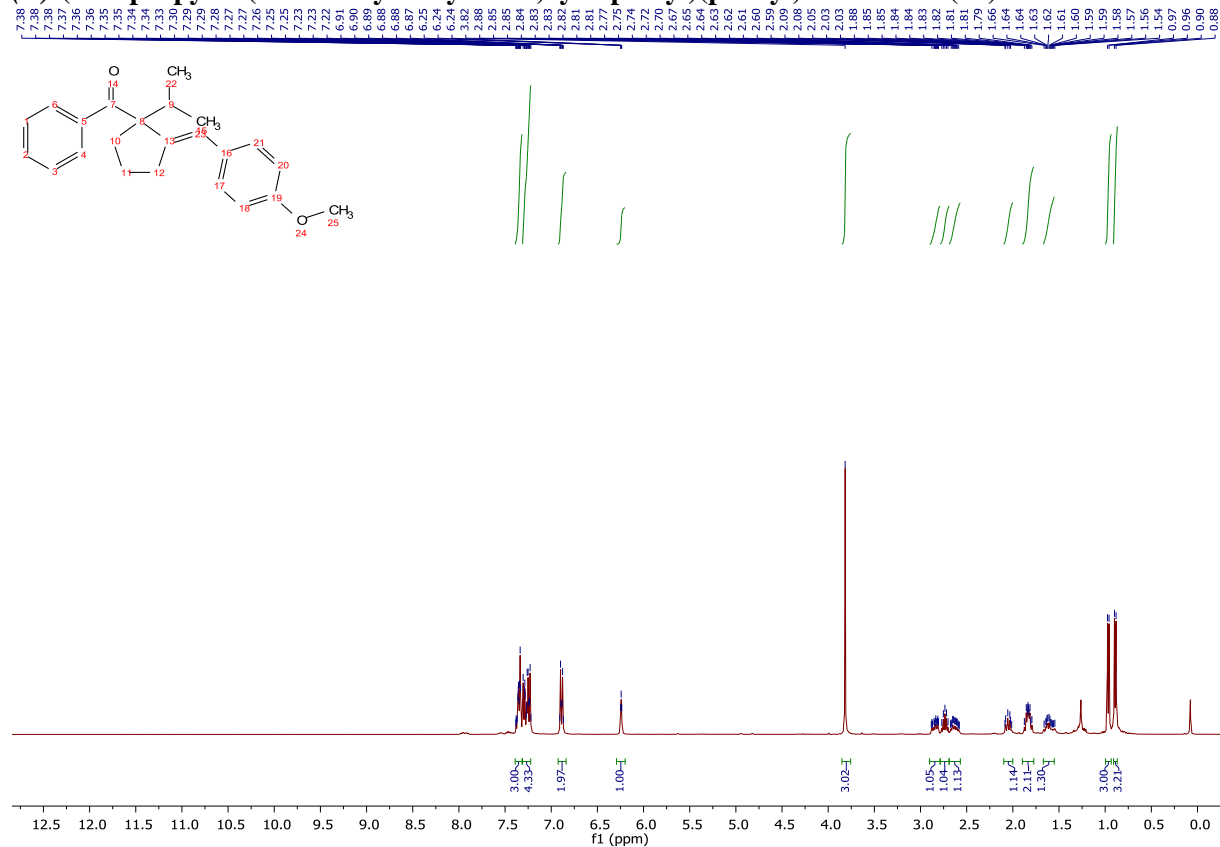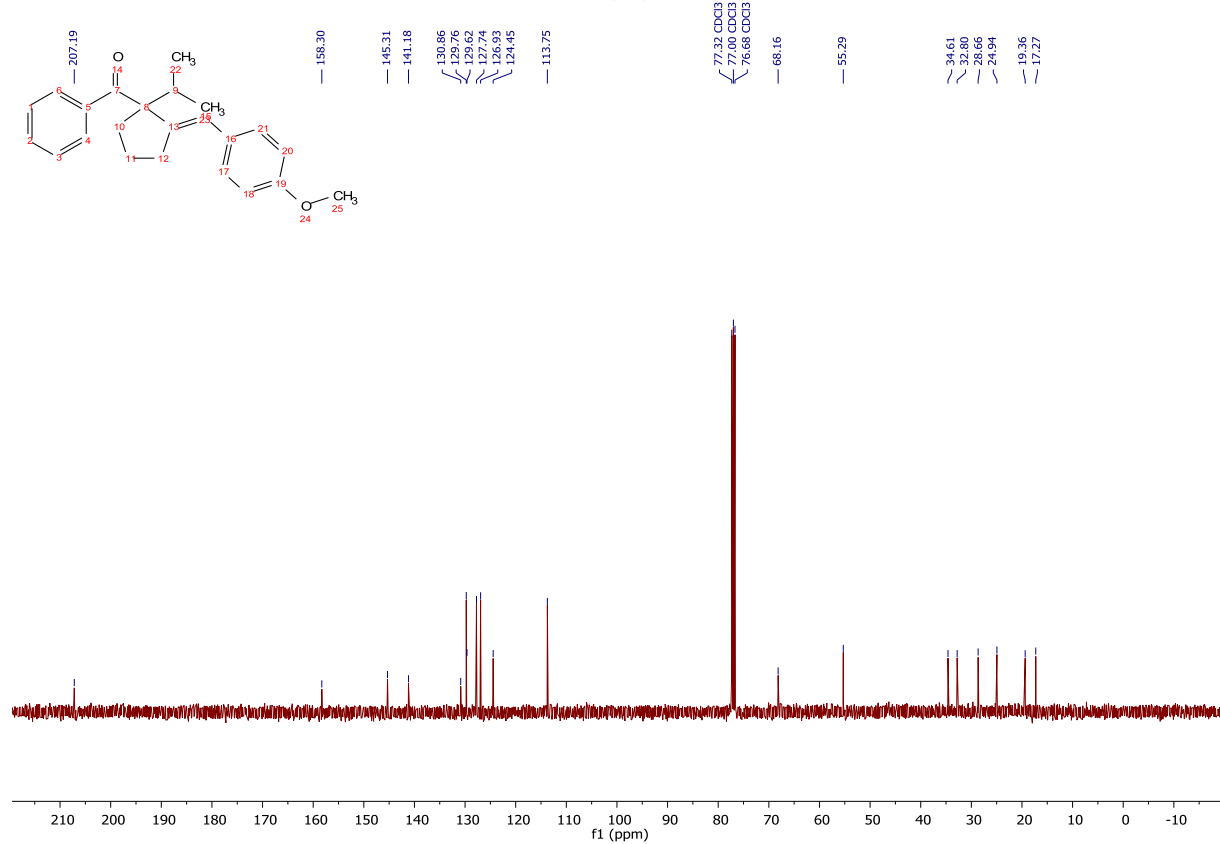

**(E)-1-(2-benzylidene-1-methylcyclopentyl)propan-1-one (42)**

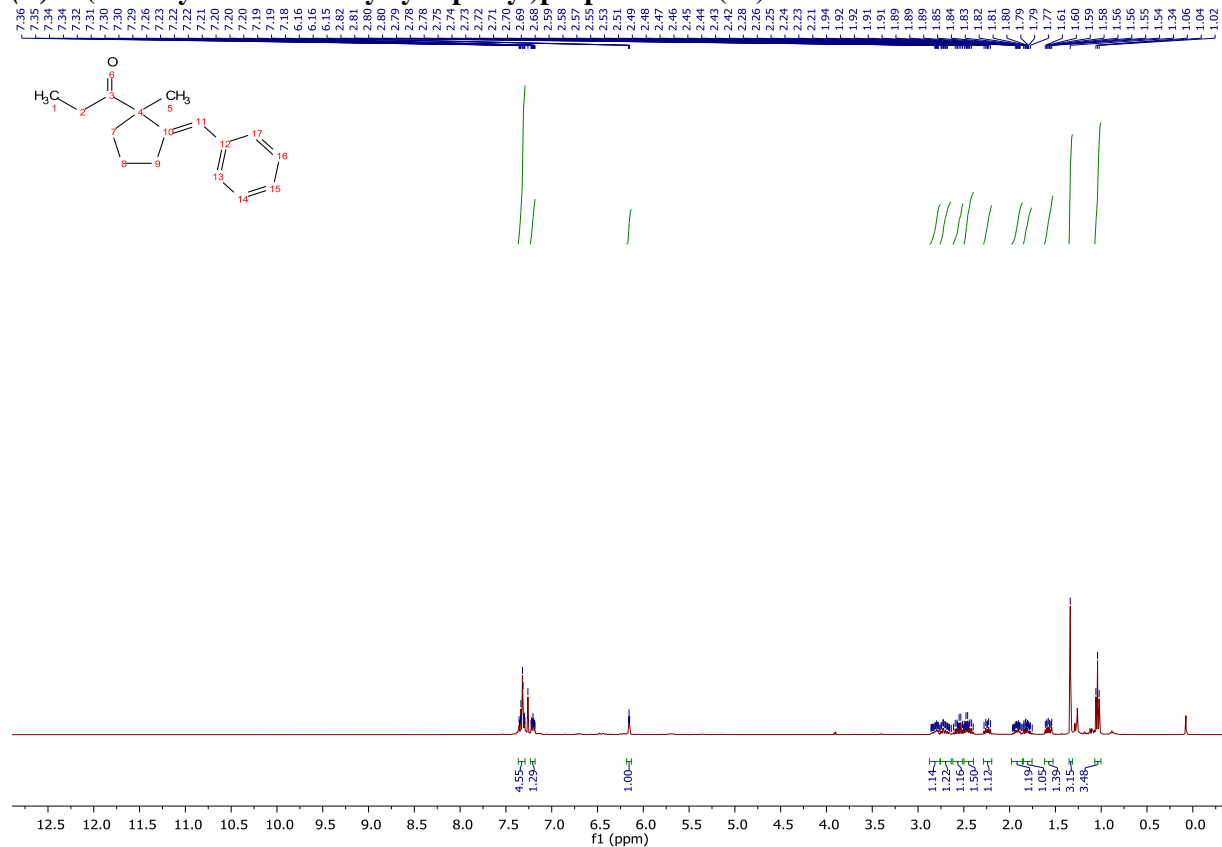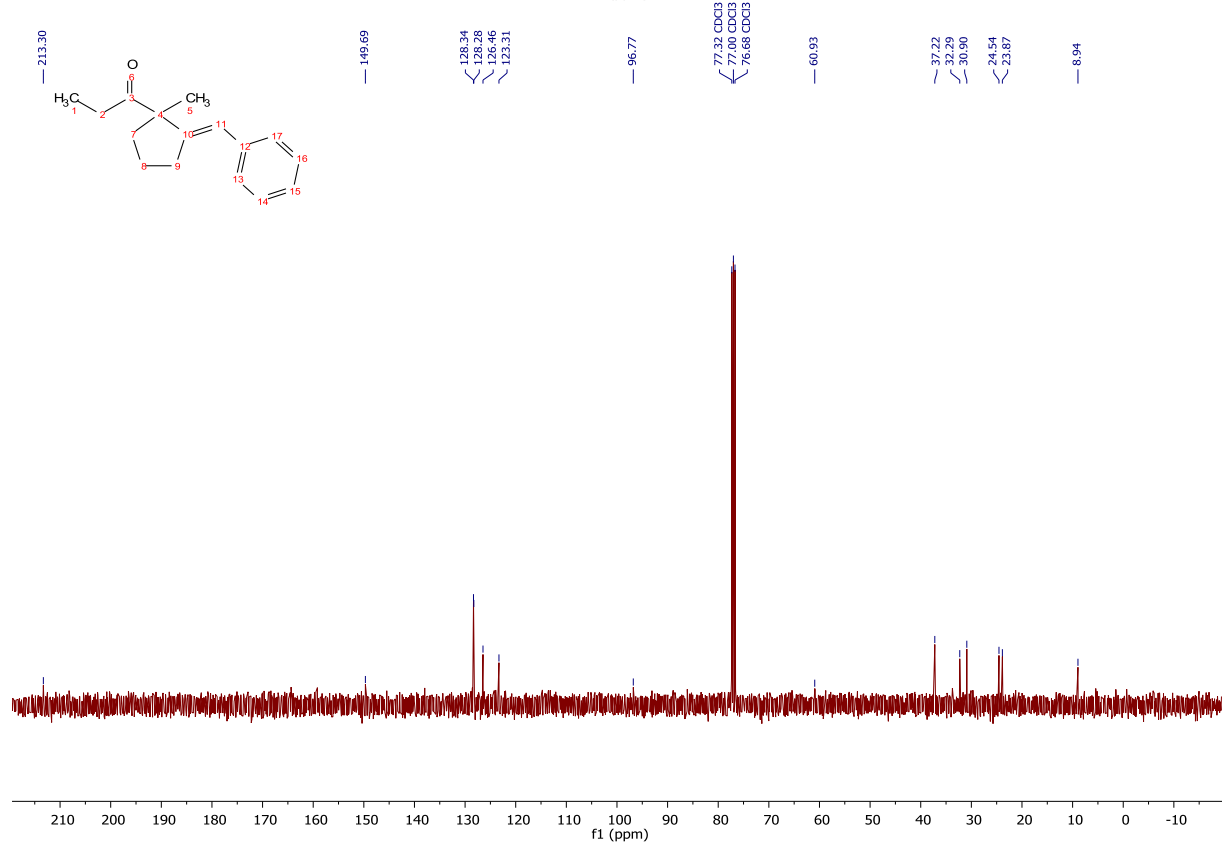



**(2-benzylcyclopent-1-en-1-yl)(phenyl)methanone (43)**

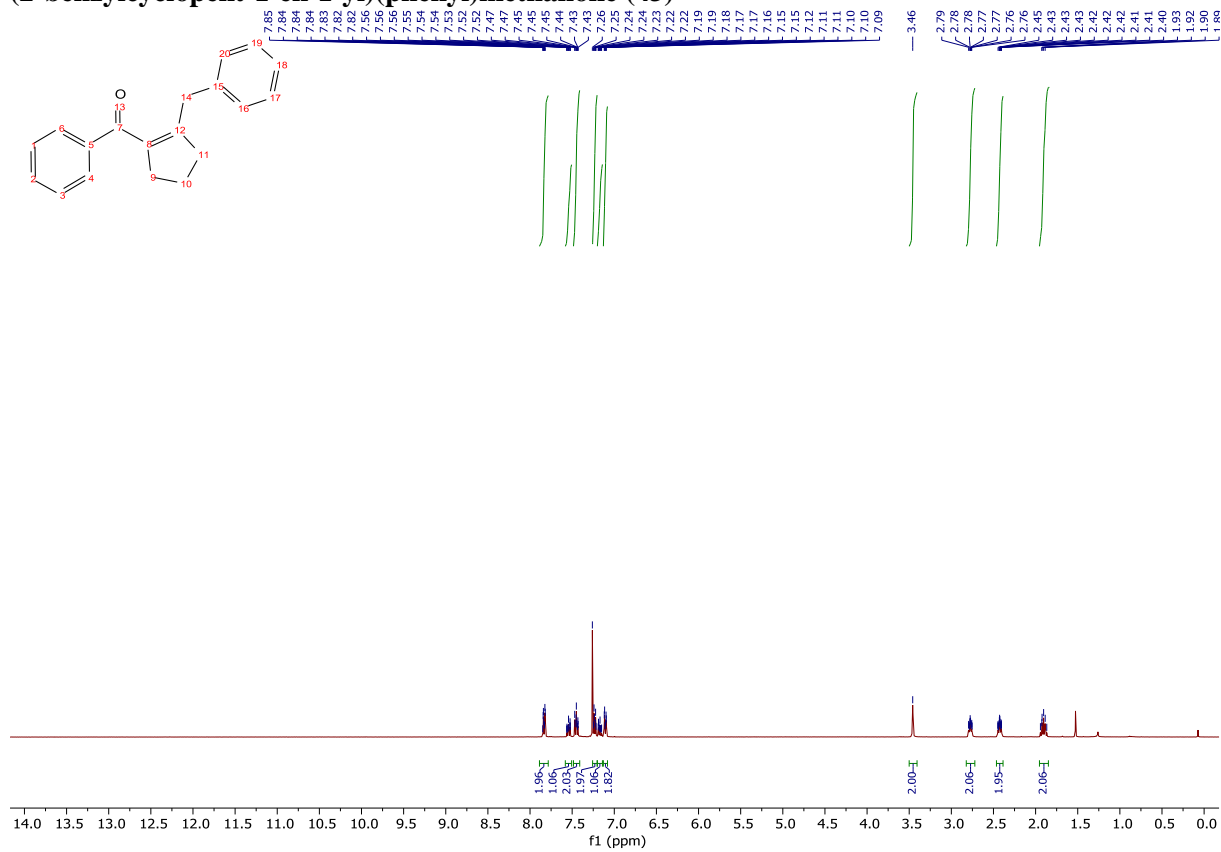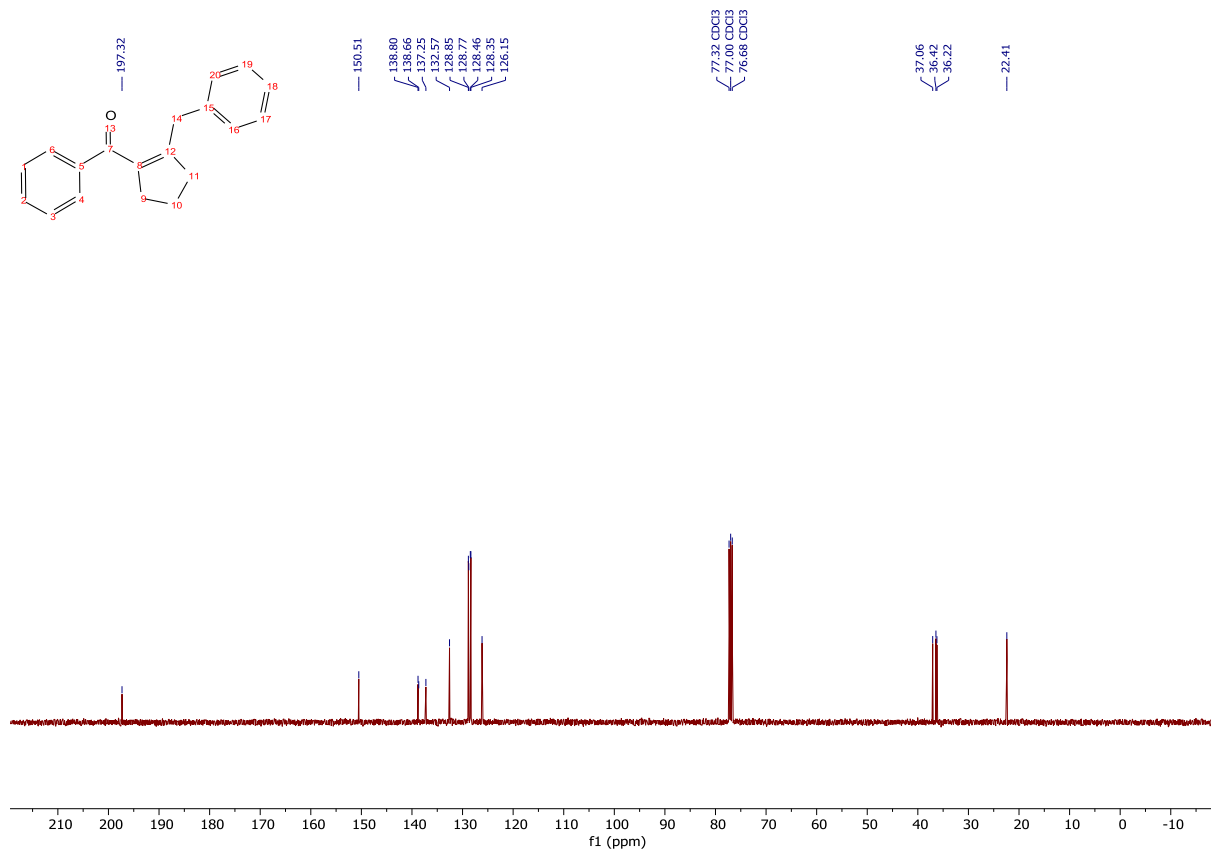

## References

- 1 N. C. Bruno, M. T. Tudge and S. L. Buchwald, *Chem. Sci.*, 2013, **4**, 916–920.
- 2 J. M. Dennis, N. A. White, R. Y. Liu and S. L. Buchwald, *ACS Catal.*, 2019, **9**, 3822–3830.
- 3 S. T. Kim, B. Pudasaini and M. H. Baik, *ACS Catal.*, 2019, **9**, 6851–6856.
- 4 M. J. Frisch, G. W. Trucks, H. B. Schlegel, G. E. Scuseria, M. a. Robb, J. R. Cheeseman, G. Scalmani, V. Barone, G. a. Petersson, H. Nakatsuji, X. Li, M. Caricato, a. V. Marenich, J. Bloino, B. G. Janesko, R. Gomperts, B. Mennucci, H. P. Hratchian, J. V. Ortiz, a. F. Izmaylov, J. L. Sonnenberg, Williams, F. Ding, F. Lipparini, F. Egidi, J. Goings, B. Peng, A. Petrone, T. Henderson, D. Ranasinghe, V. G. Zakrzewski, J. Gao, N. Rega, G. Zheng, W. Liang, M. Hada, M. Ehara, K. Toyota, R. Fukuda, J. Hasegawa, M. Ishida, T. Nakajima, Y. Honda, O. Kitao, H. Nakai, T. Vreven, K. Throssell, J. a. Montgomery Jr., J. E. Peralta, F. Ogliaro, M. J. Bearpark, J. J. Heyd, E. N. Brothers, K. N. Kudin, V. N. Staroverov, T. a. Keith, R. Kobayashi, J. Normand, K. Raghavachari, a. P. Rendell, J. C. Burant, S. S. Iyengar, J. Tomasi, M. Cossi, J. M. Millam, M. Klene, C. Adamo, R. Cammi, J. W. Ochterski, R. L. Martin, K. Morokuma, O. Farkas, J. B. Foresman and D. J. Fox, 2016, Gaussian 16, Revision C.01, Gaussian, Inc., Wallin.
- 5 S. Grimme, J. Antony, S. Ehrlich and H. Krieg, *J. Chem. Phys.*, 2010, **132**, 154104.
- 6 F. Weigend and R. Ahlrichs, *Phys. Chem. Chem. Phys.*, 2005, **7**, 3297–3305.
- 7 A. V. Marenich, C. J. Cramer and D. G. Truhlar, *J. Phys. Chem. B*, 2009, **113**, 6378–6396.
